# Supplementary material for: RNA Sequencing Reveals Interacting Key Determinants of Osteoarthritis Acting in Subchondral Bone and Articular Cartilage: Identification of IL11 and CHADL as Attractive Treatment Targets
Source: PubMed Central journal article supplement — Arthritis Rheumatol. 2021 Mar 21;73(5):789–99. doi: 10.1002/art.41600 (PMC8252798; doi:10.1002/art.41600), 2021-03-21
Supplement: ART-73-789-s001.pdf [file ART-73-789-s001.pdf]

**Supplementary table 13** - Significant differentially expressed genes exclusive for hip OA subchondral bone

| Ensembl gene ID | Gene       | P-value  | Log 2 Fold Change | Fold Change |
|-----------------|------------|----------|-------------------|-------------|
| ENSG00000004948 | CALCR      | 3,12E-02 | -1,22             | 0,43        |
| ENSG00000120738 | EGR1       | 1,17E-04 | -1,37             | 0,39        |
| ENSG00000125740 | FOSB       | 3,32E-02 | -1,70             | 0,31        |
| ENSG00000139292 | LGR5       | 4,27E-02 | -1,45             | 0,36        |
| ENSG00000167094 | TTC16      | 1,35E-02 | -1,31             | 0,40        |
| ENSG00000233013 | FAM157B    | 3,73E-02 | -1,14             | 0,45        |
| ENSG00000260105 | AOC4P      | 2,09E-02 | -1,71             | 0,31        |
| ENSG00000261026 | AC105046.1 | 3,09E-02 | -1,34             | 0,40        |
| ENSG00000279407 | AC007191.1 | 4,39E-03 | -1,29             | 0,41        |
| ENSG00000279662 | AC131649.2 | 2,72E-02 | -1,19             | 0,44        |
| ENSG00000280800 | FP671120.4 | 1,34E-02 | -1,83             | 0,28        |
| ENSG00000283199 | C13orf46   | 3,51E-02 | -1,23             | 0,43        |
| ENSG00000131459 | GFPT2      | 7,63E-03 | 1,20              | 2,30        |
| ENSG00000139219 | COL2A1     | 8,72E-03 | 2,51              | 5,71        |
| ENSG00000143512 | HHIPL2     | 7,41E-03 | 1,52              | 2,86        |
| ENSG00000180389 | ATP5F1EP2  | 1,60E-02 | 1,13              | 2,19        |
| ENSG00000253132 | IGHV3-62   | 4,79E-02 | 1,06              | 2,09        |
| ENSG00000275765 | AC091982.3 | 3,42E-02 | 1,05              | 2,07        |
