# Supplementary material for: RNA Sequencing Reveals Interacting Key Determinants of Osteoarthritis Acting in Subchondral Bone and Articular Cartilage: Identification of IL11 and CHADL as Attractive Treatment Targets
Source: PubMed Central journal article supplement — Arthritis Rheumatol. 2021 Mar 21;73(5):789–99. doi: 10.1002/art.41600 (PMC8252798; doi:10.1002/art.41600), 2021-03-21
Supplement: ART-73-789-s003.pdf [file ART-73-789-s003.pdf]

**Supplementary table 1** - Baseline characteristics of subchondral bone samples included in the study

|                 | <b>Total (N=34)</b> | <b>RNAseq - hips (N=6)</b> | <b>RNAseq - knees (N=18)</b> | <b>RT-qPCR - biological (N=10)</b> | <b>RT-qPCR - technical (N=10)</b> |
|-----------------|---------------------|----------------------------|------------------------------|------------------------------------|-----------------------------------|
| Age (SD)        | 68,1 (9,5)          | 67,8 (8,8)                 | 65,7 (8,5)                   | 72,4 (10)                          | 67,6 (7,8)                        |
| Females (total) | 27 (34)             | 6 (6)                      | 16 (18)                      | 5 (10)                             | 8 (10)                            |
