# Supplementary material for: RNA Sequencing Reveals Interacting Key Determinants of Osteoarthritis Acting in Subchondral Bone and Articular Cartilage: Identification of IL11 and CHADL as Attractive Treatment Targets
Source: PubMed Central journal article supplement — Arthritis Rheumatol. 2021 Mar 21;73(5):789–99. doi: 10.1002/art.41600 (PMC8252798; doi:10.1002/art.41600), 2021-03-21
Supplement: ART-73-789-s004.pdf [file ART-73-789-s004.pdf]

**Supplementary table 9** - Significantly differentially expressed genes in OA knee subchondral bone

| Ensembl gene ID | Gene       | P-value  | FDR      | Log 2 fold change | Fold change |
|-----------------|------------|----------|----------|-------------------|-------------|
| ENSG00000162998 | FRZB       | 3,07E-12 | 5,13E-08 | -1,05             | 0,48        |
| ENSG00000174469 | CNTNAP2    | 4,05E-10 | 3,38E-06 | 1,54              | 2,90        |
| ENSG00000054938 | CHRD2      | 7,41E-10 | 4,13E-06 | -3,47             | 0,09        |
| ENSG00000116285 | ERRFI1     | 1,61E-09 | 6,70E-06 | 0,68              | 1,60        |
| ENSG00000157103 | SLC6A1     | 3,77E-09 | 1,16E-05 | -0,76             | 0,59        |
| ENSG00000178445 | GLDC       | 4,16E-09 | 1,16E-05 | 1,78              | 3,44        |
| ENSG00000113594 | LIFR       | 1,96E-08 | 4,68E-05 | 0,43              | 1,34        |
| ENSG00000179399 | GPC5       | 3,64E-08 | 7,59E-05 | -1,36             | 0,39        |
| ENSG00000198918 | RPL39      | 4,15E-08 | 7,71E-05 | 0,42              | 1,34        |
| ENSG00000115616 | SLC9A2     | 4,72E-08 | 7,88E-05 | 1,75              | 3,35        |
| ENSG00000102466 | FGF14      | 5,51E-08 | 7,97E-05 | -1,41             | 0,38        |
| ENSG00000151025 | GPR158     | 5,73E-08 | 7,97E-05 | 1,34              | 2,54        |
| ENSG00000223561 | AC005165.1 | 7,31E-08 | 9,39E-05 | -1,31             | 0,40        |
| ENSG00000257017 | HP         | 9,28E-08 | 1,11E-04 | 1,79              | 3,46        |
| ENSG00000154783 | FGD5       | 1,17E-07 | 1,23E-04 | -0,40             | 0,76        |
| ENSG00000145934 | TENM2      | 1,22E-07 | 1,23E-04 | 0,72              | 1,64        |
| ENSG00000130158 | DOCK6      | 1,26E-07 | 1,23E-04 | -0,45             | 0,73        |
| ENSG00000229847 | EMX2OS     | 1,45E-07 | 1,34E-04 | -1,52             | 0,35        |
| ENSG00000106511 | MEOX2      | 1,56E-07 | 1,34E-04 | -0,51             | 0,70        |
| ENSG00000168685 | IL7R       | 1,64E-07 | 1,34E-04 | 1,07              | 2,10        |
| ENSG00000171517 | LPAR3      | 1,75E-07 | 1,34E-04 | 1,11              | 2,15        |
| ENSG00000175161 | CADM2      | 1,81E-07 | 1,34E-04 | -1,46             | 0,36        |
| ENSG00000002745 | WNT16      | 1,85E-07 | 1,34E-04 | 2,39              | 5,23        |
| ENSG00000144057 | ST6GAL2    | 2,31E-07 | 1,61E-04 | 2,29              | 4,88        |
| ENSG00000249306 | LINC01411  | 2,54E-07 | 1,70E-04 | 2,65              | 6,27        |
| ENSG00000104435 | STMN2      | 2,74E-07 | 1,76E-04 | 4,52              | 23,00       |
| ENSG00000159307 | SCUBE1     | 3,10E-07 | 1,92E-04 | -0,92             | 0,53        |
| ENSG00000144867 | SRPRB      | 3,95E-07 | 2,36E-04 | 0,51              | 1,43        |
| ENSG00000187244 | BCAM       | 4,10E-07 | 2,36E-04 | -0,61             | 0,66        |
| ENSG00000169871 | TRIM56     | 4,26E-07 | 2,37E-04 | -0,36             | 0,78        |
| ENSG00000110237 | ARHGEF17   | 6,59E-07 | 3,55E-04 | -0,39             | 0,76        |
| ENSG00000123610 | TNFAIP6    | 6,95E-07 | 3,63E-04 | 1,17              | 2,26        |
| ENSG00000148400 | NOTCH1     | 8,50E-07 | 4,30E-04 | -0,65             | 0,64        |
| ENSG00000232044 | SILC1      | 9,27E-07 | 4,55E-04 | 1,19              | 2,28        |
| ENSG00000138829 | FBN2       | 1,13E-06 | 5,37E-04 | 1,01              | 2,02        |
| ENSG00000146830 | GIGYF1     | 1,18E-06 | 5,49E-04 | -0,33             | 0,80        |
| ENSG00000074181 | NOTCH3     | 1,27E-06 | 5,74E-04 | -0,61             | 0,66        |
| ENSG00000150938 | CRIM1      | 1,42E-06 | 6,22E-04 | -0,55             | 0,68        |
| ENSG00000196104 | SPOCK3     | 1,81E-06 | 7,25E-04 | -2,43             | 0,19        |
| ENSG00000159200 | RCAN1      | 1,81E-06 | 7,25E-04 | 0,57              | 1,49        |
| ENSG00000171714 | ANO5       | 1,82E-06 | 7,25E-04 | 0,92              | 1,89        |
| ENSG00000134014 | ELP3       | 1,82E-06 | 7,25E-04 | 0,22              | 1,17        |
| ENSG00000107719 | PALD1      | 2,21E-06 | 8,59E-04 | -0,34             | 0,79        |
| ENSG00000125869 | LAMP5      | 2,31E-06 | 8,63E-04 | 0,92              | 1,90        |

|                 |           |          |          |       |      |
|-----------------|-----------|----------|----------|-------|------|
| ENSG00000066056 | TIE1      | 2,33E-06 | 8,63E-04 | -0,40 | 0,76 |
| ENSG00000162105 | SHANK2    | 2,60E-06 | 9,45E-04 | -1,10 | 0,47 |
| ENSG00000166426 | CRABP1    | 2,82E-06 | 9,84E-04 | 1,54  | 2,91 |
| ENSG00000140464 | PML       | 2,83E-06 | 9,84E-04 | -0,37 | 0,78 |
| ENSG00000172986 | GXYLT2    | 3,32E-06 | 1,10E-03 | 0,69  | 1,61 |
| ENSG00000128917 | DLL4      | 3,35E-06 | 1,10E-03 | -0,70 | 0,62 |
| ENSG00000118849 | RARRES1   | 3,35E-06 | 1,10E-03 | 0,87  | 1,82 |
| ENSG00000073969 | NSF       | 3,49E-06 | 1,12E-03 | 0,29  | 1,22 |
| ENSG00000174514 | MFSD4A    | 3,59E-06 | 1,13E-03 | -0,85 | 0,56 |
| ENSG00000123500 | COL10A1   | 3,93E-06 | 1,22E-03 | -1,10 | 0,47 |
| ENSG00000252835 | SCARNA21  | 4,04E-06 | 1,22E-03 | 0,43  | 1,35 |
| ENSG00000072041 | SLC6A15   | 4,09E-06 | 1,22E-03 | -1,73 | 0,30 |
| ENSG00000181035 | SLC25A42  | 4,24E-06 | 1,24E-03 | -0,36 | 0,78 |
| ENSG00000156030 | ELMSAN1   | 4,58E-06 | 1,31E-03 | -0,47 | 0,72 |
| ENSG00000153707 | PTPRD     | 4,62E-06 | 1,31E-03 | 0,61  | 1,52 |
| ENSG00000249378 | LINC01060 | 4,76E-06 | 1,32E-03 | 1,42  | 2,68 |
| ENSG00000068697 | LAPTM4A   | 4,84E-06 | 1,32E-03 | 0,23  | 1,18 |
| ENSG00000197442 | MAP3K5    | 5,37E-06 | 1,45E-03 | -0,30 | 0,81 |
| ENSG00000251322 | SHANK3    | 5,70E-06 | 1,51E-03 | -0,51 | 0,70 |
| ENSG00000083720 | OXCT1     | 5,93E-06 | 1,52E-03 | 0,41  | 1,32 |
| ENSG00000167244 | IGF2      | 5,93E-06 | 1,52E-03 | -0,58 | 0,67 |
| ENSG00000130402 | ACTN4     | 6,23E-06 | 1,58E-03 | -0,33 | 0,80 |
| ENSG00000006210 | CX3CL1    | 6,34E-06 | 1,58E-03 | -0,54 | 0,69 |
| ENSG00000167191 | GPRC5B    | 6,70E-06 | 1,64E-03 | -0,39 | 0,77 |
| ENSG00000187800 | PEAR1     | 7,32E-06 | 1,75E-03 | -0,52 | 0,70 |
| ENSG00000163902 | RPN1      | 7,33E-06 | 1,75E-03 | 0,23  | 1,18 |
| ENSG00000122862 | SRGN      | 7,57E-06 | 1,75E-03 | 0,41  | 1,33 |
| ENSG00000204580 | DDR1      | 7,62E-06 | 1,75E-03 | -0,43 | 0,74 |
| ENSG00000079246 | XRCC5     | 7,67E-06 | 1,75E-03 | 0,16  | 1,12 |
| ENSG00000089157 | RPLP0     | 8,08E-06 | 1,76E-03 | 0,32  | 1,25 |
| ENSG00000007314 | SCN4A     | 8,18E-06 | 1,76E-03 | -0,59 | 0,66 |
| ENSG00000116604 | MEF2D     | 8,31E-06 | 1,76E-03 | -0,40 | 0,76 |
| ENSG00000130787 | HIP1R     | 8,34E-06 | 1,76E-03 | -0,41 | 0,75 |
| ENSG00000145425 | RPS3A     | 8,42E-06 | 1,76E-03 | 0,27  | 1,21 |
| ENSG00000078018 | MAP2      | 8,54E-06 | 1,76E-03 | -0,44 | 0,74 |
| ENSG00000203883 | SOX18     | 8,76E-06 | 1,76E-03 | -0,68 | 0,62 |
| ENSG00000153283 | CD96      | 8,97E-06 | 1,76E-03 | 0,73  | 1,66 |
| ENSG00000091317 | CMTM6     | 9,19E-06 | 1,76E-03 | 0,29  | 1,22 |
| ENSG00000143196 | DPT       | 9,27E-06 | 1,76E-03 | 0,65  | 1,56 |
| ENSG00000113263 | ITK       | 9,38E-06 | 1,76E-03 | 0,58  | 1,49 |
| ENSG00000127533 | F2RL3     | 9,47E-06 | 1,76E-03 | -0,58 | 0,67 |
| ENSG00000153029 | MR1       | 9,48E-06 | 1,76E-03 | 0,24  | 1,18 |
| ENSG00000059122 | FLYWCH1   | 9,60E-06 | 1,76E-03 | -0,36 | 0,78 |
| ENSG00000204301 | NOTCH4    | 9,72E-06 | 1,76E-03 | -0,40 | 0,76 |
| ENSG00000196787 | HIST1H2AG | 9,75E-06 | 1,76E-03 | 0,58  | 1,50 |
| ENSG00000141431 | ASXL3     | 9,80E-06 | 1,76E-03 | -0,77 | 0,58 |
| ENSG00000101493 | ZNF516    | 9,87E-06 | 1,76E-03 | -0,35 | 0,79 |

|                 |           |          |          |       |      |
|-----------------|-----------|----------|----------|-------|------|
| ENSG00000100311 | PDGFB     | 9,98E-06 | 1,76E-03 | -0,44 | 0,74 |
| ENSG00000186335 | SLC36A2   | 1,00E-05 | 1,76E-03 | 0,91  | 1,87 |
| ENSG00000163884 | KLF15     | 1,01E-05 | 1,76E-03 | -0,70 | 0,62 |
| ENSG00000037042 | TUBG2     | 1,01E-05 | 1,76E-03 | -0,37 | 0,78 |
| ENSG00000225178 | RPSAP58   | 1,02E-05 | 1,76E-03 | 0,31  | 1,24 |
| ENSG00000110046 | ATG2A     | 1,02E-05 | 1,76E-03 | -0,32 | 0,80 |
| ENSG00000099284 | H2AFY2    | 1,04E-05 | 1,77E-03 | 0,42  | 1,34 |
| ENSG00000089685 | BIRC5     | 1,06E-05 | 1,79E-03 | 1,12  | 2,17 |
| ENSG00000177045 | SIX5      | 1,07E-05 | 1,79E-03 | -0,38 | 0,77 |
| ENSG00000133030 | MPRIIP    | 1,12E-05 | 1,85E-03 | -0,31 | 0,80 |
| ENSG00000116157 | GPX7      | 1,15E-05 | 1,88E-03 | 0,69  | 1,62 |
| ENSG00000185453 | ZSWIM9    | 1,17E-05 | 1,90E-03 | -0,72 | 0,61 |
| ENSG00000275221 | HIST1H2AK | 1,18E-05 | 1,90E-03 | 0,58  | 1,49 |
| ENSG00000101057 | MYBL2     | 1,20E-05 | 1,91E-03 | 1,07  | 2,10 |
| ENSG00000066735 | KIF26A    | 1,22E-05 | 1,93E-03 | -0,47 | 0,72 |
| ENSG00000122966 | CIT       | 1,24E-05 | 1,93E-03 | 0,51  | 1,43 |
| ENSG00000090530 | P3H2      | 1,29E-05 | 1,98E-03 | 0,59  | 1,51 |
| ENSG00000090238 | YPEL3     | 1,30E-05 | 1,98E-03 | -0,27 | 0,83 |
| ENSG00000112984 | KIF20A    | 1,33E-05 | 1,98E-03 | 1,51  | 2,85 |
| ENSG00000143409 | MINDY1    | 1,33E-05 | 1,98E-03 | -0,26 | 0,84 |
| ENSG00000167522 | ANKRD11   | 1,35E-05 | 1,98E-03 | -0,33 | 0,80 |
| ENSG00000274997 | HIST1H2AH | 1,37E-05 | 1,98E-03 | 0,55  | 1,47 |
| ENSG00000154473 | BUB3      | 1,37E-05 | 1,98E-03 | 0,21  | 1,16 |
| ENSG00000143842 | SOX13     | 1,37E-05 | 1,98E-03 | -0,47 | 0,72 |
| ENSG00000048540 | LMO3      | 1,38E-05 | 1,98E-03 | -0,92 | 0,53 |
| ENSG00000173227 | SYT12     | 1,39E-05 | 1,98E-03 | -0,52 | 0,70 |
| ENSG00000111077 | TNS2      | 1,40E-05 | 1,98E-03 | -0,47 | 0,72 |
| ENSG00000118785 | SPP1      | 1,49E-05 | 2,08E-03 | 0,54  | 1,45 |
| ENSG00000187678 | SPRY4     | 1,54E-05 | 2,15E-03 | -0,46 | 0,73 |
| ENSG00000107249 | GLIS3     | 1,56E-05 | 2,15E-03 | 0,62  | 1,54 |
| ENSG00000143061 | IGSF3     | 1,59E-05 | 2,17E-03 | 0,90  | 1,86 |
| ENSG00000165757 | JCAD      | 1,61E-05 | 2,19E-03 | -0,49 | 0,71 |
| ENSG00000141543 | EIF4A3    | 1,64E-05 | 2,19E-03 | 0,22  | 1,16 |
| ENSG00000278272 | HIST1H3C  | 1,64E-05 | 2,19E-03 | 0,84  | 1,79 |
| ENSG00000260139 | CSPG4P13  | 1,69E-05 | 2,24E-03 | -0,63 | 0,65 |
| ENSG00000112079 | STK38     | 1,72E-05 | 2,26E-03 | 0,28  | 1,21 |
| ENSG00000179933 | C14orf119 | 1,78E-05 | 2,30E-03 | 0,33  | 1,25 |
| ENSG00000148848 | ADAM12    | 1,79E-05 | 2,30E-03 | 0,81  | 1,76 |
| ENSG00000145911 | N4BP3     | 1,79E-05 | 2,30E-03 | -0,62 | 0,65 |
| ENSG00000151468 | CCDC3     | 1,88E-05 | 2,39E-03 | -0,43 | 0,74 |
| ENSG00000138160 | KIF11     | 1,89E-05 | 2,39E-03 | 0,68  | 1,60 |
| ENSG00000100593 | ISM2      | 1,91E-05 | 2,39E-03 | 1,77  | 3,40 |
| ENSG00000136868 | SLC31A1   | 1,95E-05 | 2,43E-03 | 0,34  | 1,27 |
| ENSG00000110955 | ATP5F1B   | 1,99E-05 | 2,45E-03 | 0,21  | 1,15 |
| ENSG00000198856 | OSTC      | 2,01E-05 | 2,45E-03 | 0,63  | 1,54 |
| ENSG00000156869 | FRRS1     | 2,01E-05 | 2,45E-03 | 0,57  | 1,49 |
| ENSG00000188549 | CCDC9B    | 2,02E-05 | 2,45E-03 | -0,41 | 0,75 |

|                 |            |          |          |       |      |
|-----------------|------------|----------|----------|-------|------|
| ENSG00000162739 | SLAMF6     | 2,05E-05 | 2,47E-03 | 0,79  | 1,73 |
| ENSG00000054277 | OPN3       | 2,11E-05 | 2,52E-03 | 0,56  | 1,48 |
| ENSG00000019144 | PHLDB1     | 2,15E-05 | 2,54E-03 | -0,34 | 0,79 |
| ENSG00000179542 | SLITRK4    | 2,20E-05 | 2,59E-03 | -0,58 | 0,67 |
| ENSG00000052850 | ALX4       | 2,22E-05 | 2,60E-03 | 1,18  | 2,26 |
| ENSG00000029364 | SLC39A9    | 2,25E-05 | 2,61E-03 | 0,18  | 1,13 |
| ENSG00000187231 | SESTD1     | 2,32E-05 | 2,67E-03 | -0,34 | 0,79 |
| ENSG00000061273 | HDAC7      | 2,36E-05 | 2,70E-03 | -0,28 | 0,82 |
| ENSG00000213694 | S1PR3      | 2,41E-05 | 2,74E-03 | 0,79  | 1,73 |
| ENSG00000057608 | GDI2       | 2,47E-05 | 2,79E-03 | 0,23  | 1,18 |
| ENSG00000169679 | BUB1       | 2,50E-05 | 2,81E-03 | 0,79  | 1,73 |
| ENSG00000154856 | APCDD1     | 2,54E-05 | 2,82E-03 | 0,45  | 1,36 |
| ENSG00000234797 | RPS3AP6    | 2,55E-05 | 2,82E-03 | 0,25  | 1,19 |
| ENSG00000090382 | LYZ        | 2,56E-05 | 2,82E-03 | 0,64  | 1,56 |
| ENSG00000277224 | HIST1H2BF  | 2,59E-05 | 2,83E-03 | 0,58  | 1,49 |
| ENSG00000139173 | TMEM117    | 2,68E-05 | 2,90E-03 | 0,46  | 1,38 |
| ENSG00000203710 | CR1        | 2,73E-05 | 2,91E-03 | 0,62  | 1,54 |
| ENSG00000211448 | DIO2       | 2,73E-05 | 2,91E-03 | 1,12  | 2,17 |
| ENSG00000155096 | AZIN1      | 2,75E-05 | 2,91E-03 | 0,23  | 1,17 |
| ENSG00000253141 | AC008632.1 | 2,76E-05 | 2,91E-03 | -1,68 | 0,31 |
| ENSG00000185730 | ZNF696     | 2,81E-05 | 2,92E-03 | -0,39 | 0,77 |
| ENSG00000019505 | SYT13      | 2,81E-05 | 2,92E-03 | 2,33  | 5,04 |
| ENSG00000231711 | LINC00899  | 2,82E-05 | 2,92E-03 | -0,37 | 0,78 |
| ENSG00000115468 | EFHD1      | 2,86E-05 | 2,92E-03 | -0,62 | 0,65 |
| ENSG00000127083 | OMD        | 2,86E-05 | 2,92E-03 | 0,70  | 1,62 |
| ENSG00000116584 | ARHGEF2    | 2,88E-05 | 2,92E-03 | -0,27 | 0,83 |
| ENSG00000164023 | SGMS2      | 2,91E-05 | 2,92E-03 | 0,79  | 1,73 |
| ENSG00000104415 | CCN4       | 2,91E-05 | 2,92E-03 | 0,73  | 1,66 |
| ENSG00000149380 | P4HA3      | 2,93E-05 | 2,92E-03 | 1,05  | 2,07 |
| ENSG00000153064 | BANK1      | 2,94E-05 | 2,92E-03 | -0,72 | 0,61 |
| ENSG00000168297 | PXK        | 2,95E-05 | 2,92E-03 | 0,32  | 1,25 |
| ENSG00000165655 | ZNF503     | 3,01E-05 | 2,95E-03 | -0,42 | 0,75 |
| ENSG00000157680 | DGKI       | 3,03E-05 | 2,95E-03 | 0,68  | 1,60 |
| ENSG00000158481 | CD1C       | 3,08E-05 | 2,98E-03 | 0,69  | 1,61 |
| ENSG00000136167 | LCP1       | 3,09E-05 | 2,98E-03 | 0,45  | 1,37 |
| ENSG00000112306 | RPS12      | 3,13E-05 | 3,00E-03 | 0,24  | 1,18 |
| ENSG00000274267 | HIST1H3B   | 3,20E-05 | 3,05E-03 | 0,75  | 1,69 |
| ENSG00000163479 | SSR2       | 3,21E-05 | 3,05E-03 | 0,29  | 1,22 |
| ENSG00000076924 | XAB2       | 3,29E-05 | 3,10E-03 | -0,28 | 0,82 |
| ENSG00000163823 | CCR1       | 3,35E-05 | 3,14E-03 | 0,63  | 1,55 |
| ENSG00000068784 | SRBD1      | 3,38E-05 | 3,16E-03 | 0,27  | 1,21 |
| ENSG00000136205 | TNS3       | 3,51E-05 | 3,25E-03 | -0,29 | 0,82 |
| ENSG00000181513 | ACBD4      | 3,61E-05 | 3,33E-03 | -0,37 | 0,77 |
| ENSG00000225159 | NPM1P39    | 3,66E-05 | 3,36E-03 | 0,35  | 1,28 |
| ENSG00000113732 | ATP6V0E1   | 3,83E-05 | 3,49E-03 | 0,37  | 1,29 |
| ENSG00000093167 | LRRFIP2    | 3,84E-05 | 3,49E-03 | 0,38  | 1,30 |
| ENSG00000167037 | SGSM1      | 3,95E-05 | 3,57E-03 | -0,74 | 0,60 |

|                 |          |          |          |       |      |
|-----------------|----------|----------|----------|-------|------|
| ENSG00000145284 | SCD5     | 3,99E-05 | 3,59E-03 | 0,48  | 1,40 |
| ENSG00000153993 | SEMA3D   | 4,26E-05 | 3,81E-03 | 0,80  | 1,74 |
| ENSG00000187595 | ZNF385C  | 4,37E-05 | 3,88E-03 | -1,11 | 0,46 |
| ENSG00000130702 | LAMA5    | 4,45E-05 | 3,94E-03 | -0,48 | 0,71 |
| ENSG00000186350 | RXRA     | 4,49E-05 | 3,94E-03 | -0,35 | 0,78 |
| ENSG00000064886 | CHI3L2   | 4,53E-05 | 3,95E-03 | 1,34  | 2,52 |
| ENSG00000119523 | ALG2     | 4,54E-05 | 3,95E-03 | 0,25  | 1,19 |
| ENSG00000135905 | DOCK10   | 4,62E-05 | 3,99E-03 | 0,52  | 1,43 |
| ENSG00000074695 | LMAN1    | 4,63E-05 | 3,99E-03 | 0,31  | 1,24 |
| ENSG00000123975 | CKS2     | 4,67E-05 | 3,99E-03 | 0,85  | 1,80 |
| ENSG00000130300 | PLVAP    | 4,68E-05 | 3,99E-03 | -0,47 | 0,72 |
| ENSG00000124440 | HIF3A    | 4,72E-05 | 4,00E-03 | -1,11 | 0,46 |
| ENSG00000120254 | MTHFD1L  | 4,81E-05 | 4,05E-03 | 0,55  | 1,46 |
| ENSG00000112511 | PHF1     | 4,82E-05 | 4,05E-03 | -0,32 | 0,80 |
| ENSG00000099365 | STX1B    | 4,91E-05 | 4,07E-03 | -0,86 | 0,55 |
| ENSG00000039560 | RAI14    | 4,91E-05 | 4,07E-03 | 0,27  | 1,21 |
| ENSG00000205268 | PDE7A    | 4,93E-05 | 4,07E-03 | 0,39  | 1,31 |
| ENSG00000177303 | CASKIN2  | 5,00E-05 | 4,08E-03 | -0,42 | 0,75 |
| ENSG00000108828 | VAT1     | 5,03E-05 | 4,08E-03 | -0,30 | 0,81 |
| ENSG00000157782 | CABP1    | 5,04E-05 | 4,08E-03 | -0,81 | 0,57 |
| ENSG00000136237 | RAPGEF5  | 5,04E-05 | 4,08E-03 | -0,45 | 0,73 |
| ENSG00000213923 | CSNK1E   | 5,06E-05 | 4,08E-03 | -0,22 | 0,86 |
| ENSG00000196305 | IARS     | 5,16E-05 | 4,15E-03 | 0,33  | 1,26 |
| ENSG00000166106 | ADAMTS15 | 5,25E-05 | 4,20E-03 | -0,83 | 0,56 |
| ENSG00000142937 | RPS8     | 5,33E-05 | 4,22E-03 | 0,23  | 1,17 |
| ENSG00000149930 | TAOK2    | 5,33E-05 | 4,22E-03 | -0,22 | 0,86 |
| ENSG00000111676 | ATN1     | 5,42E-05 | 4,27E-03 | -0,45 | 0,73 |
| ENSG00000184357 | HIST1H1B | 5,70E-05 | 4,40E-03 | 0,61  | 1,53 |
| ENSG00000070882 | OSBPL3   | 5,71E-05 | 4,40E-03 | 0,33  | 1,26 |
| ENSG00000070669 | ASNS     | 5,71E-05 | 4,40E-03 | 0,48  | 1,40 |
| ENSG00000168243 | GNG4     | 5,73E-05 | 4,40E-03 | 1,05  | 2,06 |
| ENSG00000185483 | ROR1     | 5,73E-05 | 4,40E-03 | 0,34  | 1,26 |
| ENSG00000106066 | CPVL     | 5,74E-05 | 4,40E-03 | 0,43  | 1,34 |
| ENSG00000171388 | APLN     | 5,81E-05 | 4,43E-03 | -0,51 | 0,70 |
| ENSG00000139613 | SMARCC2  | 5,90E-05 | 4,44E-03 | -0,25 | 0,84 |
| ENSG00000261221 | ZNF865   | 5,91E-05 | 4,44E-03 | -0,48 | 0,72 |
| ENSG00000126787 | DLGAP5   | 5,91E-05 | 4,44E-03 | 1,23  | 2,35 |
| ENSG00000182095 | TNRC18   | 5,94E-05 | 4,45E-03 | -0,38 | 0,77 |
| ENSG00000234741 | GAS5     | 5,99E-05 | 4,47E-03 | 0,28  | 1,21 |
| ENSG00000166816 | LDHD     | 6,02E-05 | 4,47E-03 | -0,44 | 0,74 |
| ENSG00000120318 | ARAP3    | 6,12E-05 | 4,52E-03 | -0,27 | 0,83 |
| ENSG00000120896 | SORBS3   | 6,17E-05 | 4,54E-03 | -0,38 | 0,77 |
| ENSG00000140443 | IGF1R    | 6,32E-05 | 4,61E-03 | -0,43 | 0,74 |
| ENSG00000005194 | CIAPIN1  | 6,33E-05 | 4,61E-03 | 0,29  | 1,22 |
| ENSG00000163501 | IHH      | 6,51E-05 | 4,69E-03 | -1,01 | 0,50 |
| ENSG00000149090 | PAMR1    | 6,51E-05 | 4,69E-03 | 0,48  | 1,40 |
| ENSG00000211892 | IGHG4    | 6,53E-05 | 4,69E-03 | 1,24  | 2,36 |

|                 |            |          |          |       |      |
|-----------------|------------|----------|----------|-------|------|
| ENSG00000198844 | ARHGEF15   | 6,55E-05 | 4,69E-03 | -0,43 | 0,74 |
| ENSG00000117091 | CD48       | 6,58E-05 | 4,69E-03 | 0,57  | 1,49 |
| ENSG00000182263 | FIGN       | 6,62E-05 | 4,70E-03 | -0,75 | 0,59 |
| ENSG00000179314 | WSCD1      | 6,67E-05 | 4,72E-03 | -0,71 | 0,61 |
| ENSG00000122133 | PAEP       | 6,72E-05 | 4,73E-03 | -1,00 | 0,50 |
| ENSG00000167173 | C15orf39   | 6,78E-05 | 4,76E-03 | -0,42 | 0,75 |
| ENSG00000163536 | SERPINI1   | 6,84E-05 | 4,78E-03 | -0,65 | 0,64 |
| ENSG00000133106 | EPSTI1     | 7,01E-05 | 4,88E-03 | 0,44  | 1,35 |
| ENSG00000276410 | HIST1H2BB  | 7,06E-05 | 4,89E-03 | 0,57  | 1,49 |
| ENSG00000132963 | POMP       | 7,10E-05 | 4,89E-03 | 0,33  | 1,26 |
| ENSG00000171056 | SOX7       | 7,11E-05 | 4,89E-03 | -0,62 | 0,65 |
| ENSG00000145088 | EAF2       | 7,28E-05 | 4,96E-03 | 0,58  | 1,49 |
| ENSG00000148337 | CIZ1       | 7,28E-05 | 4,96E-03 | -0,30 | 0,81 |
| ENSG00000165194 | PCDH19     | 7,31E-05 | 4,96E-03 | -0,83 | 0,56 |
| ENSG00000173801 | JUP        | 7,46E-05 | 5,04E-03 | -0,51 | 0,70 |
| ENSG00000006327 | TNFRSF12A  | 7,50E-05 | 5,05E-03 | 0,82  | 1,76 |
| ENSG00000272333 | KMT2B      | 7,52E-05 | 5,05E-03 | -0,37 | 0,78 |
| ENSG00000132386 | SERPINF1   | 7,57E-05 | 5,06E-03 | 0,60  | 1,52 |
| ENSG00000117724 | CENPF      | 7,62E-05 | 5,07E-03 | 0,71  | 1,64 |
| ENSG00000264364 | DYNLL2     | 7,68E-05 | 5,09E-03 | -0,28 | 0,82 |
| ENSG00000072163 | LIMS2      | 7,82E-05 | 5,10E-03 | -0,44 | 0,74 |
| ENSG00000139718 | SETD1B     | 7,83E-05 | 5,10E-03 | -0,42 | 0,75 |
| ENSG00000205581 | HMG1       | 7,86E-05 | 5,10E-03 | 0,30  | 1,23 |
| ENSG00000125354 | SEPT6      | 7,86E-05 | 5,10E-03 | 0,30  | 1,23 |
| ENSG00000116459 | ATP5PB     | 7,87E-05 | 5,10E-03 | 0,26  | 1,19 |
| ENSG00000125848 | FLRT3      | 7,88E-05 | 5,10E-03 | 0,72  | 1,65 |
| ENSG00000132024 | CC2D1A     | 8,01E-05 | 5,17E-03 | -0,28 | 0,82 |
| ENSG00000197635 | DPP4       | 8,10E-05 | 5,20E-03 | 0,76  | 1,69 |
| ENSG00000169902 | TPST1      | 8,24E-05 | 5,27E-03 | 0,62  | 1,54 |
| ENSG00000131747 | TOP2A      | 8,28E-05 | 5,28E-03 | 0,77  | 1,71 |
| ENSG00000185585 | OLFML2A    | 8,49E-05 | 5,38E-03 | -0,38 | 0,77 |
| ENSG00000121005 | CRISPLD1   | 8,53E-05 | 5,38E-03 | -1,34 | 0,40 |
| ENSG00000131238 | PPT1       | 8,54E-05 | 5,38E-03 | 0,21  | 1,16 |
| ENSG00000170961 | HAS2       | 8,69E-05 | 5,46E-03 | 0,69  | 1,61 |
| ENSG00000165732 | DDX21      | 8,73E-05 | 5,46E-03 | 0,25  | 1,19 |
| ENSG00000158315 | RHBDL2     | 8,85E-05 | 5,50E-03 | 0,91  | 1,87 |
| ENSG00000091592 | NLRP1      | 8,89E-05 | 5,50E-03 | -0,27 | 0,83 |
| ENSG00000070778 | AL162171.1 | 8,89E-05 | 5,50E-03 | -0,31 | 0,81 |
| ENSG00000170271 | FAXDC2     | 8,98E-05 | 5,53E-03 | -0,44 | 0,74 |
| ENSG00000130812 | ANGPTL6    | 9,02E-05 | 5,54E-03 | 1,34  | 2,53 |
| ENSG00000161940 | BCL6B      | 9,11E-05 | 5,57E-03 | -0,51 | 0,70 |
| ENSG00000198768 | APCDD1L    | 9,29E-05 | 5,66E-03 | 1,91  | 3,75 |
| ENSG00000100554 | ATP6V1D    | 9,53E-05 | 5,79E-03 | 0,38  | 1,30 |
| ENSG00000164463 | CREBRF     | 9,57E-05 | 5,79E-03 | -0,26 | 0,84 |
| ENSG00000131475 | VPS25      | 9,78E-05 | 5,90E-03 | 0,26  | 1,19 |
| ENSG00000198933 | TBKBP1     | 9,85E-05 | 5,92E-03 | -0,36 | 0,78 |
| ENSG00000126709 | IFI6       | 9,90E-05 | 5,93E-03 | 0,35  | 1,28 |

|                 |           |          |          |       |      |
|-----------------|-----------|----------|----------|-------|------|
| ENSG00000106211 | HSPB1     | 1,00E-04 | 5,99E-03 | -0,53 | 0,69 |
| ENSG00000133110 | POSTN     | 1,01E-04 | 5,99E-03 | 1,35  | 2,55 |
| ENSG00000114315 | HES1      | 1,02E-04 | 5,99E-03 | -0,46 | 0,73 |
| ENSG00000138162 | TACC2     | 1,03E-04 | 5,99E-03 | -0,53 | 0,69 |
| ENSG00000266074 | BAHCC1    | 1,03E-04 | 5,99E-03 | -0,37 | 0,78 |
| ENSG00000166741 | NNMT      | 1,03E-04 | 5,99E-03 | 0,43  | 1,35 |
| ENSG00000169302 | STK32A    | 1,04E-04 | 5,99E-03 | -0,49 | 0,71 |
| ENSG00000082212 | ME2       | 1,04E-04 | 5,99E-03 | 0,34  | 1,27 |
| ENSG00000136854 | STXBP1    | 1,04E-04 | 5,99E-03 | -0,47 | 0,72 |
| ENSG00000132646 | PCNA      | 1,04E-04 | 5,99E-03 | 0,33  | 1,26 |
| ENSG00000175061 | SNHG29    | 1,04E-04 | 5,99E-03 | 0,23  | 1,17 |
| ENSG00000126368 | NR1D1     | 1,05E-04 | 5,99E-03 | -0,78 | 0,58 |
| ENSG00000103319 | EEF2K     | 1,05E-04 | 5,99E-03 | -0,25 | 0,84 |
| ENSG00000128590 | DNAJB9    | 1,06E-04 | 5,99E-03 | 0,38  | 1,30 |
| ENSG00000151240 | DIP2C     | 1,06E-04 | 5,99E-03 | -0,32 | 0,80 |
| ENSG00000226221 | RPL26P19  | 1,06E-04 | 5,99E-03 | 0,27  | 1,21 |
| ENSG00000137497 | NUMA1     | 1,07E-04 | 6,01E-03 | -0,28 | 0,82 |
| ENSG00000165072 | MAMDC2    | 1,07E-04 | 6,01E-03 | 0,51  | 1,43 |
| ENSG00000010319 | SEMA3G    | 1,07E-04 | 6,01E-03 | -0,69 | 0,62 |
| ENSG00000151917 | BEND6     | 1,08E-04 | 6,01E-03 | 0,83  | 1,78 |
| ENSG00000272398 | CD24      | 1,09E-04 | 6,06E-03 | 0,69  | 1,62 |
| ENSG00000154133 | ROBO4     | 1,10E-04 | 6,09E-03 | -0,52 | 0,70 |
| ENSG00000143543 | JTB       | 1,12E-04 | 6,18E-03 | 0,32  | 1,25 |
| ENSG00000182774 | RPS17     | 1,13E-04 | 6,21E-03 | 0,20  | 1,15 |
| ENSG00000213553 | RPLPOP6   | 1,13E-04 | 6,21E-03 | 0,32  | 1,25 |
| ENSG00000165804 | ZNF219    | 1,14E-04 | 6,24E-03 | -0,50 | 0,71 |
| ENSG00000197153 | HIST1H3J  | 1,15E-04 | 6,24E-03 | 0,94  | 1,91 |
| ENSG00000213672 | NCKIPSD   | 1,15E-04 | 6,24E-03 | -0,35 | 0,78 |
| ENSG00000168907 | PLA2G4F   | 1,16E-04 | 6,29E-03 | 1,28  | 2,43 |
| ENSG00000058453 | CROCC     | 1,17E-04 | 6,32E-03 | -0,27 | 0,83 |
| ENSG00000169385 | RNASE2    | 1,18E-04 | 6,35E-03 | 1,22  | 2,33 |
| ENSG00000273703 | HIST1H2BM | 1,21E-04 | 6,48E-03 | 0,91  | 1,88 |
| ENSG00000116396 | KCNC4     | 1,22E-04 | 6,53E-03 | -0,37 | 0,78 |
| ENSG00000105639 | JAK3      | 1,24E-04 | 6,57E-03 | 0,54  | 1,45 |
| ENSG00000104408 | EIF3E     | 1,24E-04 | 6,57E-03 | 0,27  | 1,21 |
| ENSG00000186174 | BCL9L     | 1,24E-04 | 6,57E-03 | -0,46 | 0,73 |
| ENSG00000174059 | CD34      | 1,25E-04 | 6,62E-03 | -0,39 | 0,76 |
| ENSG00000126217 | MCF2L     | 1,26E-04 | 6,62E-03 | -0,40 | 0,76 |
| ENSG00000146731 | CCT6A     | 1,28E-04 | 6,70E-03 | 0,27  | 1,21 |
| ENSG00000086598 | TMED2     | 1,29E-04 | 6,74E-03 | 0,25  | 1,19 |
| ENSG00000088367 | EPB41L1   | 1,29E-04 | 6,75E-03 | -0,54 | 0,69 |
| ENSG00000105357 | MYH14     | 1,30E-04 | 6,78E-03 | -0,65 | 0,64 |
| ENSG00000171798 | KNDC1     | 1,32E-04 | 6,84E-03 | -0,76 | 0,59 |
| ENSG00000082458 | DLG3      | 1,34E-04 | 6,89E-03 | -0,25 | 0,84 |
| ENSG00000106080 | FKBP14    | 1,34E-04 | 6,89E-03 | 0,45  | 1,36 |
| ENSG00000149485 | FADS1     | 1,37E-04 | 7,00E-03 | 0,39  | 1,31 |
| ENSG00000001617 | SEMA3F    | 1,37E-04 | 7,00E-03 | -0,54 | 0,69 |

|                 |            |          |          |       |      |
|-----------------|------------|----------|----------|-------|------|
| ENSG00000058799 | YIPF1      | 1,37E-04 | 7,00E-03 | 0,29  | 1,22 |
| ENSG00000095752 | IL11       | 1,38E-04 | 7,00E-03 | 2,02  | 4,07 |
| ENSG00000115128 | SF3B6      | 1,38E-04 | 7,01E-03 | 0,27  | 1,20 |
| ENSG00000100234 | TIMP3      | 1,39E-04 | 7,03E-03 | -0,49 | 0,71 |
| ENSG00000173327 | MAP3K11    | 1,40E-04 | 7,03E-03 | -0,30 | 0,81 |
| ENSG00000049540 | ELN        | 1,40E-04 | 7,03E-03 | -0,55 | 0,68 |
| ENSG00000230148 | HOXB-AS1   | 1,40E-04 | 7,03E-03 | 1,28  | 2,43 |
| ENSG00000115306 | SPTBN1     | 1,41E-04 | 7,03E-03 | -0,55 | 0,68 |
| ENSG00000012048 | BRCA1      | 1,41E-04 | 7,03E-03 | 0,30  | 1,23 |
| ENSG00000148303 | RPL7A      | 1,42E-04 | 7,04E-03 | 0,19  | 1,14 |
| ENSG00000143367 | TUFT1      | 1,42E-04 | 7,04E-03 | -0,53 | 0,69 |
| ENSG00000099995 | SF3A1      | 1,43E-04 | 7,08E-03 | -0,25 | 0,84 |
| ENSG00000279117 | AP001972.5 | 1,44E-04 | 7,11E-03 | -0,34 | 0,79 |
| ENSG00000116793 | PHTF1      | 1,45E-04 | 7,14E-03 | 0,33  | 1,26 |
| ENSG00000146067 | FAM193B    | 1,47E-04 | 7,18E-03 | -0,24 | 0,85 |
| ENSG00000084764 | MAPRE3     | 1,49E-04 | 7,26E-03 | -0,46 | 0,73 |
| ENSG00000171105 | INSR       | 1,49E-04 | 7,26E-03 | -0,38 | 0,77 |
| ENSG00000143614 | GATAD2B    | 1,49E-04 | 7,26E-03 | -0,31 | 0,81 |
| ENSG00000075651 | PLD1       | 1,53E-04 | 7,40E-03 | 0,27  | 1,20 |
| ENSG00000125257 | ABCC4      | 1,53E-04 | 7,40E-03 | 0,55  | 1,46 |
| ENSG00000177169 | ULK1       | 1,54E-04 | 7,42E-03 | -0,33 | 0,80 |
| ENSG00000178752 | ERFE       | 1,57E-04 | 7,49E-03 | 1,22  | 2,33 |
| ENSG00000152661 | GJA1       | 1,58E-04 | 7,49E-03 | 0,61  | 1,53 |
| ENSG00000132622 | HSPA12B    | 1,58E-04 | 7,49E-03 | -0,41 | 0,75 |
| ENSG00000140157 | NIPA2      | 1,59E-04 | 7,49E-03 | 0,33  | 1,26 |
| ENSG00000214389 | RPS3AP26   | 1,59E-04 | 7,49E-03 | 0,25  | 1,19 |
| ENSG00000078902 | TOLLIP     | 1,60E-04 | 7,49E-03 | -0,28 | 0,82 |
| ENSG00000273983 | HIST1H3G   | 1,60E-04 | 7,49E-03 | 0,88  | 1,84 |
| ENSG00000137285 | TUBB2B     | 1,60E-04 | 7,49E-03 | -0,60 | 0,66 |
| ENSG00000177728 | TMEM94     | 1,61E-04 | 7,49E-03 | -0,31 | 0,81 |
| ENSG00000184113 | CLDN5      | 1,61E-04 | 7,49E-03 | -0,68 | 0,62 |
| ENSG00000166130 | IKBIP      | 1,61E-04 | 7,49E-03 | 0,42  | 1,34 |
| ENSG00000114573 | ATP6V1A    | 1,61E-04 | 7,49E-03 | 0,39  | 1,31 |
| ENSG00000151348 | EXT2       | 1,63E-04 | 7,53E-03 | 0,23  | 1,17 |
| ENSG00000172575 | RASGRP1    | 1,64E-04 | 7,54E-03 | 0,60  | 1,51 |
| ENSG00000118855 | MFSD1      | 1,65E-04 | 7,54E-03 | 0,30  | 1,24 |
| ENSG00000215018 | COL28A1    | 1,66E-04 | 7,54E-03 | 0,80  | 1,74 |
| ENSG00000087302 | RTRAF      | 1,66E-04 | 7,54E-03 | 0,22  | 1,16 |
| ENSG00000125304 | TM9SF2     | 1,67E-04 | 7,54E-03 | 0,24  | 1,18 |
| ENSG00000100979 | PLTP       | 1,67E-04 | 7,54E-03 | 0,56  | 1,47 |
| ENSG00000189056 | RELN       | 1,67E-04 | 7,54E-03 | -1,31 | 0,40 |
| ENSG00000110693 | SOX6       | 1,67E-04 | 7,54E-03 | -0,45 | 0,73 |
| ENSG00000038427 | VCAN       | 1,67E-04 | 7,54E-03 | 0,73  | 1,66 |
| ENSG00000138018 | SELENOI    | 1,68E-04 | 7,54E-03 | 0,32  | 1,25 |
| ENSG00000197057 | DTHD1      | 1,68E-04 | 7,55E-03 | 0,97  | 1,95 |
| ENSG00000231500 | RPS18      | 1,69E-04 | 7,55E-03 | 0,21  | 1,16 |
| ENSG00000154589 | LY96       | 1,69E-04 | 7,55E-03 | 0,63  | 1,55 |



|                 |          |          |          |       |      |
|-----------------|----------|----------|----------|-------|------|
| ENSG00000146386 | ABRACL   | 1,70E-04 | 7,58E-03 | 0,59  | 1,51 |
| ENSG00000149115 | TNKS1BP1 | 1,72E-04 | 7,63E-03 | -0,42 | 0,75 |
| ENSG00000184500 | PROS1    | 1,74E-04 | 7,70E-03 | 0,31  | 1,24 |
| ENSG00000179981 | TSHZ1    | 1,74E-04 | 7,70E-03 | -0,31 | 0,81 |
| ENSG00000069849 | ATP1B3   | 1,75E-04 | 7,72E-03 | 0,44  | 1,36 |
| ENSG00000189129 | PLAC9    | 1,76E-04 | 7,73E-03 | -0,39 | 0,76 |
| ENSG00000102393 | GLA      | 1,77E-04 | 7,74E-03 | 0,35  | 1,27 |
| ENSG00000126351 | THRA     | 1,77E-04 | 7,74E-03 | -0,34 | 0,79 |
| ENSG00000173517 | PEAK1    | 1,78E-04 | 7,74E-03 | -0,28 | 0,83 |
| ENSG00000103145 | HCFC1R1  | 1,78E-04 | 7,74E-03 | 0,30  | 1,23 |
| ENSG00000107816 | LZTS2    | 1,79E-04 | 7,74E-03 | -0,25 | 0,84 |
| ENSG00000185842 | DNAH14   | 1,79E-04 | 7,75E-03 | 0,71  | 1,64 |
| ENSG00000145685 | LHFPL2   | 1,80E-04 | 7,75E-03 | 0,45  | 1,37 |
| ENSG00000171992 | SYNPO    | 1,81E-04 | 7,75E-03 | -0,47 | 0,72 |
| ENSG00000108509 | CAMTA2   | 1,82E-04 | 7,75E-03 | -0,33 | 0,79 |
| ENSG00000139734 | DIAPH3   | 1,82E-04 | 7,75E-03 | 1,05  | 2,07 |
| ENSG00000132003 | ZSWIM4   | 1,82E-04 | 7,75E-03 | -0,46 | 0,73 |
| ENSG00000156508 | EEF1A1   | 1,83E-04 | 7,75E-03 | 0,19  | 1,14 |
| ENSG00000122824 | NUDT10   | 1,83E-04 | 7,75E-03 | 0,63  | 1,54 |
| ENSG00000174282 | ZBTB4    | 1,84E-04 | 7,75E-03 | -0,37 | 0,77 |
| ENSG00000128641 | MYO1B    | 1,84E-04 | 7,75E-03 | 0,39  | 1,31 |
| ENSG00000129757 | CDKN1C   | 1,84E-04 | 7,75E-03 | -0,50 | 0,70 |
| ENSG00000169635 | HIC2     | 1,85E-04 | 7,75E-03 | -0,37 | 0,77 |
| ENSG00000085265 | FCN1     | 1,85E-04 | 7,75E-03 | 0,55  | 1,47 |
| ENSG00000033327 | GAB2     | 1,86E-04 | 7,77E-03 | -0,39 | 0,76 |
| ENSG00000174951 | FUT1     | 1,86E-04 | 7,77E-03 | -0,57 | 0,68 |
| ENSG00000146834 | MEPCE    | 1,87E-04 | 7,77E-03 | -0,31 | 0,81 |
| ENSG00000114999 | TTL      | 1,87E-04 | 7,77E-03 | 0,27  | 1,21 |
| ENSG00000158828 | PINK1    | 1,90E-04 | 7,87E-03 | -0,21 | 0,86 |
| ENSG00000130584 | ZBTB46   | 1,91E-04 | 7,90E-03 | -0,34 | 0,79 |
| ENSG00000138623 | SEMA7A   | 1,92E-04 | 7,90E-03 | 0,54  | 1,45 |
| ENSG00000198833 | UBE2J1   | 1,94E-04 | 7,98E-03 | 0,26  | 1,19 |
| ENSG00000065882 | TBC1D1   | 1,95E-04 | 7,98E-03 | -0,23 | 0,85 |
| ENSG00000173597 | SULT1B1  | 1,96E-04 | 8,01E-03 | 0,72  | 1,65 |
| ENSG00000163590 | PPM1L    | 1,99E-04 | 8,14E-03 | -0,42 | 0,75 |
| ENSG00000118193 | KIF14    | 2,03E-04 | 8,28E-03 | 0,73  | 1,66 |
| ENSG00000169490 | TM2D2    | 2,04E-04 | 8,28E-03 | 0,22  | 1,17 |
| ENSG00000140538 | NTRK3    | 2,04E-04 | 8,28E-03 | -0,47 | 0,72 |
| ENSG00000089009 | RPL6     | 2,06E-04 | 8,30E-03 | 0,20  | 1,15 |
| ENSG00000138207 | RBP4     | 2,06E-04 | 8,30E-03 | -0,50 | 0,71 |
| ENSG00000127184 | COX7C    | 2,07E-04 | 8,32E-03 | 0,27  | 1,20 |
| ENSG00000069020 | MAST4    | 2,08E-04 | 8,32E-03 | -0,46 | 0,73 |
| ENSG00000174574 | AKIRIN1  | 2,08E-04 | 8,32E-03 | 0,22  | 1,17 |
| ENSG00000126860 | EVI2A    | 2,09E-04 | 8,35E-03 | 0,56  | 1,48 |
| ENSG00000204977 | TRIM13   | 2,11E-04 | 8,40E-03 | 0,19  | 1,14 |
| ENSG00000266524 | GDF10    | 2,11E-04 | 8,40E-03 | -0,79 | 0,58 |
| ENSG00000140470 | ADAMTS17 | 2,12E-04 | 8,42E-03 | 0,45  | 1,36 |

|                 |            |          |          |       |      |
|-----------------|------------|----------|----------|-------|------|
| ENSG00000130723 | PRRC2B     | 2,14E-04 | 8,44E-03 | -0,32 | 0,80 |
| ENSG00000114541 | FRMD4B     | 2,14E-04 | 8,44E-03 | 0,23  | 1,17 |
| ENSG00000104881 | PPP1R13L   | 2,14E-04 | 8,44E-03 | -0,43 | 0,74 |
| ENSG00000090006 | LTBP4      | 2,16E-04 | 8,49E-03 | -0,61 | 0,66 |
| ENSG00000071282 | LMCD1      | 2,20E-04 | 8,61E-03 | -0,46 | 0,73 |
| ENSG00000119888 | EPCAM      | 2,20E-04 | 8,61E-03 | 0,58  | 1,49 |
| ENSG00000182566 | CLEC4G     | 2,22E-04 | 8,62E-03 | 0,99  | 1,99 |
| ENSG00000064393 | HIPK2      | 2,22E-04 | 8,62E-03 | -0,45 | 0,73 |
| ENSG00000138756 | BMP2K      | 2,23E-04 | 8,62E-03 | 0,29  | 1,22 |
| ENSG00000116016 | EPAS1      | 2,23E-04 | 8,62E-03 | -0,43 | 0,74 |
| ENSG00000076685 | NT5C2      | 2,23E-04 | 8,62E-03 | 0,19  | 1,14 |
| ENSG00000189159 | JPT1       | 2,26E-04 | 8,70E-03 | 0,43  | 1,35 |
| ENSG00000115884 | SDC1       | 2,27E-04 | 8,74E-03 | 0,52  | 1,43 |
| ENSG00000132840 | BHMT2      | 2,28E-04 | 8,77E-03 | -0,72 | 0,61 |
| ENSG00000164970 | FAM219A    | 2,31E-04 | 8,84E-03 | -0,26 | 0,83 |
| ENSG00000170558 | CDH2       | 2,31E-04 | 8,84E-03 | 0,74  | 1,67 |
| ENSG00000196235 | SUPT5H     | 2,32E-04 | 8,85E-03 | -0,25 | 0,84 |
| ENSG00000086570 | FAT2       | 2,36E-04 | 8,98E-03 | -1,07 | 0,47 |
| ENSG00000109323 | MANBA      | 2,37E-04 | 8,98E-03 | 0,24  | 1,18 |
| ENSG00000124942 | AHNAK      | 2,37E-04 | 8,98E-03 | -0,32 | 0,80 |
| ENSG00000198755 | RPL10A     | 2,38E-04 | 8,99E-03 | 0,21  | 1,16 |
| ENSG00000099864 | PALM       | 2,39E-04 | 9,01E-03 | -0,68 | 0,63 |
| ENSG00000167861 | HID1       | 2,40E-04 | 9,01E-03 | -0,60 | 0,66 |
| ENSG00000152818 | UTRN       | 2,40E-04 | 9,01E-03 | -0,23 | 0,85 |
| ENSG00000134901 | KDELC1     | 2,41E-04 | 9,04E-03 | 0,53  | 1,44 |
| ENSG00000122406 | RPL5       | 2,42E-04 | 9,06E-03 | 0,18  | 1,13 |
| ENSG00000111530 | CAND1      | 2,45E-04 | 9,11E-03 | 0,15  | 1,11 |
| ENSG00000198018 | ENTPD7     | 2,45E-04 | 9,11E-03 | 0,56  | 1,47 |
| ENSG00000225200 | AC246787.1 | 2,46E-04 | 9,14E-03 | 0,28  | 1,22 |
| ENSG00000134684 | YARS       | 2,49E-04 | 9,21E-03 | 0,34  | 1,26 |
| ENSG00000079313 | REXO1      | 2,50E-04 | 9,23E-03 | -0,34 | 0,79 |
| ENSG00000147202 | DIAPH2     | 2,53E-04 | 9,33E-03 | -0,28 | 0,82 |
| ENSG00000005243 | COPZ2      | 2,54E-04 | 9,33E-03 | 0,43  | 1,35 |
| ENSG00000109794 | FAM149A    | 2,55E-04 | 9,37E-03 | -0,56 | 0,68 |
| ENSG00000112249 | ASCC3      | 2,56E-04 | 9,38E-03 | 0,29  | 1,22 |
| ENSG00000127377 | CRYGN      | 2,57E-04 | 9,38E-03 | -0,85 | 0,55 |
| ENSG00000276644 | DACH1      | 2,58E-04 | 9,40E-03 | -0,51 | 0,70 |
| ENSG00000079337 | RAPGEF3    | 2,59E-04 | 9,42E-03 | -0,38 | 0,77 |
| ENSG00000137038 | DMAC1      | 2,60E-04 | 9,44E-03 | 0,23  | 1,17 |
| ENSG00000136383 | ALPK3      | 2,62E-04 | 9,50E-03 | -0,56 | 0,68 |
| ENSG00000137962 | ARHGAP29   | 2,65E-04 | 9,59E-03 | -0,35 | 0,78 |
| ENSG00000183876 | ARSI       | 2,69E-04 | 9,67E-03 | 1,72  | 3,29 |
| ENSG00000104973 | MED25      | 2,69E-04 | 9,67E-03 | -0,31 | 0,81 |
| ENSG00000164932 | CTHRC1     | 2,69E-04 | 9,67E-03 | 1,14  | 2,20 |
| ENSG00000163527 | STT3B      | 2,71E-04 | 9,69E-03 | 0,25  | 1,19 |
| ENSG00000240694 | PNMA2      | 2,72E-04 | 9,69E-03 | 0,56  | 1,47 |
| ENSG00000120332 | TNN        | 2,72E-04 | 9,69E-03 | 0,80  | 1,74 |

|                 |           |          |          |       |      |
|-----------------|-----------|----------|----------|-------|------|
| ENSG00000074660 | SCARF1    | 2,73E-04 | 9,69E-03 | -0,26 | 0,83 |
| ENSG00000165699 | TSC1      | 2,73E-04 | 9,69E-03 | -0,18 | 0,88 |
| ENSG00000235174 | RPL39P3   | 2,73E-04 | 9,69E-03 | 0,26  | 1,20 |
| ENSG00000164715 | LMTK2     | 2,74E-04 | 9,69E-03 | -0,24 | 0,85 |
| ENSG00000172830 | SSH3      | 2,75E-04 | 9,71E-03 | -0,30 | 0,81 |
| ENSG00000043143 | JADE2     | 2,77E-04 | 9,75E-03 | -0,40 | 0,76 |
| ENSG00000183826 | BTBD9     | 2,77E-04 | 9,75E-03 | -0,26 | 0,84 |
| ENSG00000008853 | RHOBTB2   | 2,79E-04 | 9,81E-03 | -0,32 | 0,80 |
| ENSG00000132510 | KDM6B     | 2,80E-04 | 9,81E-03 | -0,50 | 0,71 |
| ENSG00000186994 | KANK3     | 2,83E-04 | 9,88E-03 | -0,42 | 0,75 |
| ENSG00000142784 | WDTC1     | 2,86E-04 | 9,97E-03 | -0,34 | 0,79 |
| ENSG00000177508 | IRX3      | 2,88E-04 | 1,00E-02 | -0,44 | 0,74 |
| ENSG00000142149 | HUNK      | 2,90E-04 | 1,01E-02 | 0,93  | 1,90 |
| ENSG00000100307 | CBX7      | 2,91E-04 | 1,01E-02 | -0,50 | 0,71 |
| ENSG00000137941 | TTLL7     | 2,93E-04 | 1,01E-02 | -0,66 | 0,63 |
| ENSG00000124782 | RREB1     | 2,94E-04 | 1,02E-02 | -0,24 | 0,85 |
| ENSG00000137103 | TMEM8B    | 2,96E-04 | 1,02E-02 | -0,47 | 0,72 |
| ENSG00000131480 | AOC2      | 2,96E-04 | 1,02E-02 | 0,50  | 1,41 |
| ENSG00000168672 | FAM84B    | 2,98E-04 | 1,02E-02 | -0,43 | 0,74 |
| ENSG00000229132 | EIF4A1P10 | 3,01E-04 | 1,03E-02 | 0,34  | 1,27 |
| ENSG00000165801 | ARHGEF40  | 3,04E-04 | 1,04E-02 | -0,27 | 0,83 |
| ENSG00000277734 | TRAC      | 3,04E-04 | 1,04E-02 | 0,58  | 1,50 |
| ENSG00000263155 | MYZAP     | 3,05E-04 | 1,04E-02 | -0,91 | 0,53 |
| ENSG00000183111 | ARHGEF37  | 3,06E-04 | 1,04E-02 | -0,50 | 0,71 |
| ENSG00000150471 | ADGRL3    | 3,09E-04 | 1,05E-02 | -0,75 | 0,60 |
| ENSG00000078687 | TNRC6C    | 3,10E-04 | 1,05E-02 | -0,31 | 0,81 |
| ENSG00000109501 | WFS1      | 3,14E-04 | 1,06E-02 | -0,56 | 0,68 |
| ENSG00000154153 | RETREG1   | 3,14E-04 | 1,06E-02 | 0,55  | 1,46 |
| ENSG00000087274 | ADD1      | 3,15E-04 | 1,06E-02 | -0,19 | 0,88 |
| ENSG00000140836 | ZFHX3     | 3,16E-04 | 1,06E-02 | -0,36 | 0,78 |
| ENSG00000154639 | CXADR     | 3,16E-04 | 1,06E-02 | 1,00  | 2,00 |
| ENSG00000278588 | HIST1H2BI | 3,17E-04 | 1,06E-02 | 0,48  | 1,40 |
| ENSG00000119335 | SET       | 3,19E-04 | 1,06E-02 | 0,18  | 1,13 |
| ENSG00000198242 | RPL23A    | 3,21E-04 | 1,07E-02 | 0,20  | 1,15 |
| ENSG00000171848 | RRM2      | 3,22E-04 | 1,07E-02 | 1,06  | 2,09 |
| ENSG00000164736 | SOX17     | 3,23E-04 | 1,07E-02 | -0,48 | 0,72 |
| ENSG00000188487 | INSC      | 3,24E-04 | 1,07E-02 | 0,49  | 1,41 |
| ENSG00000133056 | PIK3C2B   | 3,24E-04 | 1,07E-02 | -0,43 | 0,74 |
| ENSG00000177103 | DSCAML1   | 3,26E-04 | 1,07E-02 | -0,65 | 0,64 |
| ENSG00000164509 | IL31RA    | 3,28E-04 | 1,08E-02 | 1,45  | 2,73 |
| ENSG00000196557 | CACNA1H   | 3,29E-04 | 1,08E-02 | -0,59 | 0,66 |
| ENSG00000156471 | PTDSS1    | 3,30E-04 | 1,08E-02 | 0,20  | 1,15 |
| ENSG00000148926 | ADM       | 3,31E-04 | 1,08E-02 | -0,54 | 0,69 |
| ENSG00000229638 | RPL4P4    | 3,32E-04 | 1,08E-02 | 0,20  | 1,15 |
| ENSG00000062524 | LTK       | 3,34E-04 | 1,09E-02 | 0,93  | 1,90 |
| ENSG00000140416 | TPM1      | 3,36E-04 | 1,09E-02 | 0,32  | 1,25 |
| ENSG00000132470 | ITGB4     | 3,40E-04 | 1,10E-02 | -0,44 | 0,74 |

|                 |          |          |          |       |      |
|-----------------|----------|----------|----------|-------|------|
| ENSG00000057252 | SOAT1    | 3,40E-04 | 1,10E-02 | 0,18  | 1,13 |
| ENSG00000213593 | TMX2     | 3,41E-04 | 1,10E-02 | 0,18  | 1,14 |
| ENSG00000173915 | ATP5MD   | 3,44E-04 | 1,11E-02 | 0,35  | 1,28 |
| ENSG00000111481 | COPZ1    | 3,45E-04 | 1,11E-02 | 0,17  | 1,12 |
| ENSG00000102882 | MAPK3    | 3,46E-04 | 1,11E-02 | -0,35 | 0,78 |
| ENSG00000134825 | TMEM258  | 3,47E-04 | 1,11E-02 | 0,28  | 1,22 |
| ENSG00000256968 | SNRPEP2  | 3,47E-04 | 1,11E-02 | 0,74  | 1,67 |
| ENSG00000165929 | TC2N     | 3,49E-04 | 1,12E-02 | 0,55  | 1,46 |
| ENSG00000164236 | ANKRD33B | 3,50E-04 | 1,12E-02 | -1,07 | 0,47 |
| ENSG00000185950 | IRS2     | 3,55E-04 | 1,13E-02 | -0,75 | 0,59 |
| ENSG00000144749 | LRIG1    | 3,55E-04 | 1,13E-02 | -0,56 | 0,68 |
| ENSG00000164294 | GPX8     | 3,58E-04 | 1,13E-02 | 0,43  | 1,35 |
| ENSG00000005339 | CREBBP   | 3,58E-04 | 1,13E-02 | -0,34 | 0,79 |
| ENSG00000166716 | ZNF592   | 3,58E-04 | 1,13E-02 | -0,28 | 0,82 |
| ENSG00000105321 | CCDC9    | 3,58E-04 | 1,13E-02 | -0,30 | 0,81 |
| ENSG00000134817 | APLNR    | 3,60E-04 | 1,13E-02 | -0,35 | 0,78 |
| ENSG00000186377 | CYP4X1   | 3,61E-04 | 1,13E-02 | -0,71 | 0,61 |
| ENSG00000196954 | CASP4    | 3,62E-04 | 1,13E-02 | 0,33  | 1,26 |
| ENSG00000182220 | ATP6AP2  | 3,62E-04 | 1,13E-02 | 0,26  | 1,20 |
| ENSG00000197077 | KIAA1671 | 3,62E-04 | 1,13E-02 | -0,32 | 0,80 |
| ENSG00000126458 | RRAS     | 3,62E-04 | 1,13E-02 | -0,40 | 0,76 |
| ENSG00000117016 | RIMS3    | 3,64E-04 | 1,13E-02 | -0,52 | 0,70 |
| ENSG00000163701 | IL17RE   | 3,65E-04 | 1,13E-02 | -0,72 | 0,61 |
| ENSG00000103404 | USP31    | 3,67E-04 | 1,14E-02 | 0,17  | 1,12 |
| ENSG00000174669 | SLC29A2  | 3,69E-04 | 1,14E-02 | -0,82 | 0,57 |
| ENSG00000123892 | RAB38    | 3,70E-04 | 1,14E-02 | 0,65  | 1,57 |
| ENSG00000151490 | PTPRO    | 3,71E-04 | 1,14E-02 | 0,67  | 1,59 |
| ENSG00000184545 | DUSP8    | 3,71E-04 | 1,14E-02 | -0,73 | 0,60 |
| ENSG00000095370 | SH2D3C   | 3,71E-04 | 1,14E-02 | -0,33 | 0,80 |
| ENSG00000168542 | COL3A1   | 3,72E-04 | 1,14E-02 | 1,20  | 2,30 |
| ENSG00000170855 | TRIAP1   | 3,73E-04 | 1,14E-02 | 0,33  | 1,25 |
| ENSG00000128595 | CALU     | 3,74E-04 | 1,14E-02 | 0,43  | 1,35 |
| ENSG00000137573 | SULF1    | 3,78E-04 | 1,15E-02 | 0,37  | 1,29 |
| ENSG00000128266 | GNAZ     | 3,79E-04 | 1,15E-02 | -0,62 | 0,65 |
| ENSG00000100242 | SUN2     | 3,84E-04 | 1,16E-02 | -0,31 | 0,81 |
| ENSG00000120733 | KDM3B    | 3,84E-04 | 1,16E-02 | -0,22 | 0,86 |
| ENSG00000118596 | SLC16A7  | 3,85E-04 | 1,16E-02 | 0,32  | 1,25 |
| ENSG00000100345 | MYH9     | 3,85E-04 | 1,16E-02 | -0,27 | 0,83 |
| ENSG00000116288 | PARK7    | 3,85E-04 | 1,16E-02 | 0,22  | 1,16 |
| ENSG00000160953 | PWWP3A   | 3,89E-04 | 1,17E-02 | -0,21 | 0,86 |
| ENSG00000147416 | ATP6V1B2 | 3,90E-04 | 1,17E-02 | 0,41  | 1,33 |
| ENSG00000105227 | PRX      | 3,91E-04 | 1,17E-02 | -0,39 | 0,76 |
| ENSG00000140612 | SEC11A   | 3,91E-04 | 1,17E-02 | 0,22  | 1,16 |
| ENSG00000152234 | ATP5F1A  | 3,93E-04 | 1,17E-02 | 0,19  | 1,14 |
| ENSG00000004700 | RECQL    | 3,93E-04 | 1,17E-02 | 0,23  | 1,17 |
| ENSG00000218350 | LYPLA1P3 | 3,94E-04 | 1,17E-02 | 0,59  | 1,51 |
| ENSG00000121316 | PLBD1    | 3,96E-04 | 1,18E-02 | 0,29  | 1,23 |

|                 |            |          |          |       |      |
|-----------------|------------|----------|----------|-------|------|
| ENSG00000148344 | PTGES      | 4,04E-04 | 1,20E-02 | 0,89  | 1,85 |
| ENSG00000117036 | ETV3       | 4,05E-04 | 1,20E-02 | -0,25 | 0,84 |
| ENSG00000134030 | CTIF       | 4,06E-04 | 1,20E-02 | -0,40 | 0,76 |
| ENSG00000103942 | HOMER2     | 4,08E-04 | 1,20E-02 | 0,49  | 1,41 |
| ENSG00000112837 | TBX18      | 4,08E-04 | 1,20E-02 | -0,34 | 0,79 |
| ENSG00000175315 | CST6       | 4,12E-04 | 1,21E-02 | -0,71 | 0,61 |
| ENSG00000173210 | ABLIM3     | 4,12E-04 | 1,21E-02 | -0,43 | 0,74 |
| ENSG00000213719 | CLIC1      | 4,15E-04 | 1,22E-02 | 0,18  | 1,13 |
| ENSG00000088930 | XRN2       | 4,18E-04 | 1,22E-02 | 0,20  | 1,15 |
| ENSG00000092421 | SEMA6A     | 4,19E-04 | 1,22E-02 | -0,43 | 0,74 |
| ENSG00000111319 | SCNN1A     | 4,20E-04 | 1,22E-02 | -1,05 | 0,48 |
| ENSG00000168036 | CTNNB1     | 4,22E-04 | 1,23E-02 | 0,15  | 1,11 |
| ENSG00000196498 | NCOR2      | 4,24E-04 | 1,23E-02 | -0,41 | 0,75 |
| ENSG00000142611 | PRDM16     | 4,25E-04 | 1,23E-02 | -0,54 | 0,69 |
| ENSG00000159387 | IRX6       | 4,25E-04 | 1,23E-02 | -0,72 | 0,61 |
| ENSG00000138741 | TRPC3      | 4,29E-04 | 1,24E-02 | 0,57  | 1,49 |
| ENSG00000118292 | C1orf54    | 4,30E-04 | 1,24E-02 | 0,56  | 1,47 |
| ENSG00000106819 | ASPN       | 4,32E-04 | 1,24E-02 | 1,63  | 3,10 |
| ENSG00000074696 | HACD3      | 4,32E-04 | 1,24E-02 | 0,33  | 1,26 |
| ENSG00000130749 | AC008755.1 | 4,35E-04 | 1,25E-02 | -0,35 | 0,78 |
| ENSG00000197563 | PIGN       | 4,35E-04 | 1,25E-02 | 0,23  | 1,17 |
| ENSG00000015475 | BID        | 4,36E-04 | 1,25E-02 | 0,41  | 1,33 |
| ENSG00000104946 | TBC1D17    | 4,37E-04 | 1,25E-02 | -0,34 | 0,79 |
| ENSG00000135924 | DNAJB2     | 4,39E-04 | 1,25E-02 | -0,22 | 0,86 |
| ENSG00000143570 | SLC39A1    | 4,41E-04 | 1,25E-02 | 0,19  | 1,14 |
| ENSG00000260428 | SCX        | 4,42E-04 | 1,26E-02 | 1,05  | 2,07 |
| ENSG00000275713 | HIST1H2BH  | 4,44E-04 | 1,26E-02 | 0,58  | 1,50 |
| ENSG00000185551 | NR2F2      | 4,45E-04 | 1,26E-02 | -0,37 | 0,77 |
| ENSG00000122359 | ANXA11     | 4,46E-04 | 1,26E-02 | -0,23 | 0,85 |
| ENSG00000090905 | TNRC6A     | 4,48E-04 | 1,26E-02 | -0,19 | 0,88 |
| ENSG00000168772 | CXXC4      | 4,48E-04 | 1,26E-02 | -0,52 | 0,70 |
| ENSG00000123496 | IL13RA2    | 4,52E-04 | 1,27E-02 | -0,87 | 0,55 |
| ENSG00000130294 | KIF1A      | 4,54E-04 | 1,27E-02 | -2,32 | 0,20 |
| ENSG00000076984 | MAP2K7     | 4,55E-04 | 1,27E-02 | -0,26 | 0,83 |
| ENSG00000197614 | MFAP5      | 4,55E-04 | 1,27E-02 | -1,05 | 0,48 |
| ENSG00000157110 | RBPMS      | 4,57E-04 | 1,28E-02 | -0,46 | 0,73 |
| ENSG00000168028 | RPSA       | 4,60E-04 | 1,28E-02 | 0,26  | 1,20 |
| ENSG00000109906 | ZBTB16     | 4,61E-04 | 1,28E-02 | -0,68 | 0,62 |
| ENSG00000232472 | EEF1B2P3   | 4,62E-04 | 1,28E-02 | 0,24  | 1,18 |
| ENSG00000164647 | STEAP1     | 4,62E-04 | 1,28E-02 | 0,49  | 1,41 |
| ENSG00000149100 | EIF3M      | 4,64E-04 | 1,28E-02 | 0,17  | 1,13 |
| ENSG00000126005 | MMP24OS    | 4,65E-04 | 1,29E-02 | -0,28 | 0,82 |
| ENSG00000136261 | BZW2       | 4,67E-04 | 1,29E-02 | 0,34  | 1,27 |
| ENSG00000123095 | BHLHE41    | 4,73E-04 | 1,30E-02 | -0,51 | 0,70 |
| ENSG00000167972 | ABCA3      | 4,73E-04 | 1,30E-02 | -0,54 | 0,69 |
| ENSG00000113273 | ARSB       | 4,76E-04 | 1,31E-02 | 0,52  | 1,43 |
| ENSG00000162654 | GBP4       | 4,80E-04 | 1,32E-02 | -0,36 | 0,78 |

|                 |           |          |          |       |      |
|-----------------|-----------|----------|----------|-------|------|
| ENSG00000135341 | MAP3K7    | 4,84E-04 | 1,32E-02 | 0,19  | 1,14 |
| ENSG00000109861 | CTSC      | 4,85E-04 | 1,33E-02 | 0,33  | 1,26 |
| ENSG00000225630 | MTND2P28  | 4,87E-04 | 1,33E-02 | -0,62 | 0,65 |
| ENSG00000066279 | ASPM      | 4,88E-04 | 1,33E-02 | 0,79  | 1,73 |
| ENSG00000189043 | NDUFA4    | 4,88E-04 | 1,33E-02 | 0,33  | 1,26 |
| ENSG00000134242 | PTPN22    | 4,89E-04 | 1,33E-02 | 0,42  | 1,33 |
| ENSG00000159363 | ATP13A2   | 4,90E-04 | 1,33E-02 | -0,33 | 0,80 |
| ENSG00000024422 | EHD2      | 4,91E-04 | 1,33E-02 | -0,54 | 0,69 |
| ENSG00000163466 | ARPC2     | 4,94E-04 | 1,34E-02 | 0,20  | 1,15 |
| ENSG00000100678 | SLC8A3    | 4,95E-04 | 1,34E-02 | 0,68  | 1,60 |
| ENSG00000112584 | FAM120B   | 4,97E-04 | 1,34E-02 | -0,23 | 0,85 |
| ENSG00000168702 | LRP1B     | 4,98E-04 | 1,34E-02 | -0,58 | 0,67 |
| ENSG00000135838 | NPL       | 5,00E-04 | 1,34E-02 | 0,53  | 1,44 |
| ENSG00000134363 | FST       | 5,06E-04 | 1,35E-02 | -0,44 | 0,73 |
| ENSG00000182397 | DNM1P46   | 5,06E-04 | 1,35E-02 | -0,84 | 0,56 |
| ENSG00000138792 | ENPEP     | 5,06E-04 | 1,35E-02 | 0,44  | 1,35 |
| ENSG00000124491 | F13A1     | 5,07E-04 | 1,35E-02 | 0,39  | 1,31 |
| ENSG00000106105 | GARS      | 5,09E-04 | 1,35E-02 | 0,37  | 1,29 |
| ENSG00000163389 | POGLUT1   | 5,11E-04 | 1,35E-02 | 0,34  | 1,27 |
| ENSG00000102554 | KLF5      | 5,11E-04 | 1,35E-02 | -0,39 | 0,76 |
| ENSG00000148296 | SURF6     | 5,12E-04 | 1,35E-02 | -0,25 | 0,84 |
| ENSG00000104369 | JPH1      | 5,12E-04 | 1,35E-02 | -0,79 | 0,58 |
| ENSG00000146083 | RNF44     | 5,12E-04 | 1,35E-02 | -0,37 | 0,77 |
| ENSG00000145623 | OSMR      | 5,17E-04 | 1,36E-02 | 0,65  | 1,57 |
| ENSG00000198517 | MAFK      | 5,18E-04 | 1,36E-02 | -0,25 | 0,84 |
| ENSG00000037749 | MFAP3     | 5,19E-04 | 1,36E-02 | 0,20  | 1,15 |
| ENSG00000154027 | AK5       | 5,19E-04 | 1,36E-02 | 0,99  | 1,98 |
| ENSG00000213741 | RPS29     | 5,20E-04 | 1,36E-02 | 0,23  | 1,17 |
| ENSG00000135404 | CD63      | 5,21E-04 | 1,36E-02 | 0,23  | 1,17 |
| ENSG00000171241 | SHCBP1    | 5,24E-04 | 1,37E-02 | 0,88  | 1,84 |
| ENSG00000184481 | FOXO4     | 5,25E-04 | 1,37E-02 | -0,39 | 0,76 |
| ENSG00000185361 | TNFAIP8L1 | 5,26E-04 | 1,37E-02 | -0,41 | 0,75 |
| ENSG00000170962 | PDGFD     | 5,26E-04 | 1,37E-02 | 0,35  | 1,28 |
| ENSG00000114019 | AMOTL2    | 5,29E-04 | 1,37E-02 | -0,45 | 0,73 |
| ENSG00000126562 | WNK4      | 5,30E-04 | 1,37E-02 | -0,77 | 0,58 |
| ENSG00000198369 | SPRED2    | 5,31E-04 | 1,37E-02 | -0,40 | 0,76 |
| ENSG00000185022 | MAFF      | 5,31E-04 | 1,37E-02 | -0,58 | 0,67 |
| ENSG00000111229 | ARPC3     | 5,34E-04 | 1,38E-02 | 0,29  | 1,22 |
| ENSG00000257704 | INAFM1    | 5,37E-04 | 1,39E-02 | -0,34 | 0,79 |
| ENSG00000141469 | SLC14A1   | 5,39E-04 | 1,39E-02 | -1,15 | 0,45 |
| ENSG00000125144 | MT1G      | 5,40E-04 | 1,39E-02 | 1,32  | 2,50 |
| ENSG00000197879 | MYO1C     | 5,41E-04 | 1,39E-02 | -0,45 | 0,73 |
| ENSG00000122592 | HOXA7     | 5,42E-04 | 1,39E-02 | -0,38 | 0,77 |
| ENSG00000047648 | ARHGAP6   | 5,44E-04 | 1,39E-02 | -0,39 | 0,76 |
| ENSG00000266412 | NCOA4     | 5,45E-04 | 1,39E-02 | 0,24  | 1,18 |
| ENSG00000173482 | PTPRM     | 5,45E-04 | 1,39E-02 | -0,21 | 0,87 |
| ENSG00000007264 | MATK      | 5,48E-04 | 1,39E-02 | 0,61  | 1,52 |

|                 |            |          |          |       |      |
|-----------------|------------|----------|----------|-------|------|
| ENSG00000159322 | ADPGK      | 5,50E-04 | 1,40E-02 | 0,21  | 1,16 |
| ENSG00000124374 | PAIP2B     | 5,60E-04 | 1,42E-02 | -0,47 | 0,72 |
| ENSG00000088888 | MAVS       | 5,60E-04 | 1,42E-02 | -0,20 | 0,87 |
| ENSG00000146282 | RARS2      | 5,61E-04 | 1,42E-02 | 0,21  | 1,16 |
| ENSG00000196154 | S100A4     | 5,62E-04 | 1,42E-02 | 0,45  | 1,37 |
| ENSG00000174136 | RGMB       | 5,64E-04 | 1,42E-02 | -0,49 | 0,71 |
| ENSG00000043591 | ADRB1      | 5,65E-04 | 1,42E-02 | -1,23 | 0,43 |
| ENSG00000078098 | FAP        | 5,65E-04 | 1,42E-02 | 1,12  | 2,18 |
| ENSG00000099381 | SETD1A     | 5,66E-04 | 1,42E-02 | -0,34 | 0,79 |
| ENSG00000186472 | PCLO       | 5,66E-04 | 1,42E-02 | -0,76 | 0,59 |
| ENSG00000115604 | IL18R1     | 5,68E-04 | 1,42E-02 | 0,44  | 1,36 |
| ENSG00000156650 | KAT6B      | 5,70E-04 | 1,43E-02 | -0,23 | 0,85 |
| ENSG00000166987 | MBD6       | 5,72E-04 | 1,43E-02 | -0,36 | 0,78 |
| ENSG00000112144 | ICK        | 5,72E-04 | 1,43E-02 | -0,25 | 0,84 |
| ENSG00000276368 | HIST1H2AJ  | 5,77E-04 | 1,44E-02 | 0,75  | 1,68 |
| ENSG00000125691 | RPL23      | 5,79E-04 | 1,44E-02 | 0,21  | 1,15 |
| ENSG00000171502 | COL24A1    | 5,80E-04 | 1,44E-02 | 0,72  | 1,65 |
| ENSG00000168824 | NSG1       | 5,80E-04 | 1,44E-02 | 1,34  | 2,52 |
| ENSG00000270640 | AC104695.4 | 5,81E-04 | 1,44E-02 | -0,80 | 0,58 |
| ENSG00000158258 | CLSTN2     | 5,83E-04 | 1,44E-02 | -0,62 | 0,65 |
| ENSG00000128656 | CHN1       | 5,86E-04 | 1,44E-02 | 0,43  | 1,35 |
| ENSG00000117707 | PROX1      | 5,86E-04 | 1,44E-02 | -0,76 | 0,59 |
| ENSG00000138180 | CEP55      | 5,89E-04 | 1,45E-02 | 1,10  | 2,14 |
| ENSG00000108039 | XPNPEP1    | 5,89E-04 | 1,45E-02 | 0,23  | 1,17 |
| ENSG00000013375 | PGM3       | 5,92E-04 | 1,45E-02 | 0,44  | 1,36 |
| ENSG00000204256 | BRD2       | 5,92E-04 | 1,45E-02 | -0,13 | 0,91 |
| ENSG00000124160 | NCOA5      | 5,95E-04 | 1,45E-02 | -0,19 | 0,88 |
| ENSG00000170801 | HTRA3      | 5,96E-04 | 1,46E-02 | 0,87  | 1,83 |
| ENSG00000144895 | EIF2A      | 5,99E-04 | 1,46E-02 | 0,18  | 1,13 |
| ENSG00000185862 | EVI2B      | 6,01E-04 | 1,46E-02 | 0,33  | 1,26 |
| ENSG00000076108 | BAZ2A      | 6,02E-04 | 1,46E-02 | -0,30 | 0,81 |
| ENSG00000122877 | EGR2       | 6,04E-04 | 1,47E-02 | -0,75 | 0,59 |
| ENSG00000124172 | ATP5F1E    | 6,06E-04 | 1,47E-02 | 0,22  | 1,17 |
| ENSG00000058091 | CDK14      | 6,07E-04 | 1,47E-02 | 0,46  | 1,37 |
| ENSG00000051341 | POLQ       | 6,07E-04 | 1,47E-02 | 0,77  | 1,71 |
| ENSG00000116774 | OLFML3     | 6,08E-04 | 1,47E-02 | 0,29  | 1,23 |
| ENSG00000196205 | EEF1A1P5   | 6,17E-04 | 1,49E-02 | 0,20  | 1,15 |
| ENSG00000128699 | ORMDL1     | 6,19E-04 | 1,49E-02 | 0,22  | 1,16 |
| ENSG00000141232 | TOB1       | 6,19E-04 | 1,49E-02 | -0,39 | 0,76 |
| ENSG00000188763 | FZD9       | 6,25E-04 | 1,50E-02 | -1,07 | 0,48 |
| ENSG00000172974 | AC007318.1 | 6,31E-04 | 1,51E-02 | 0,20  | 1,15 |
| ENSG00000081913 | PHLPP1     | 6,34E-04 | 1,51E-02 | -0,31 | 0,81 |
| ENSG00000158747 | NBL1       | 6,35E-04 | 1,51E-02 | 0,35  | 1,28 |
| ENSG00000175354 | PTPN2      | 6,36E-04 | 1,51E-02 | 0,25  | 1,19 |
| ENSG00000160752 | FDPS       | 6,36E-04 | 1,51E-02 | 0,20  | 1,15 |
| ENSG00000158683 | PKD1L1     | 6,37E-04 | 1,52E-02 | -0,47 | 0,72 |
| ENSG00000152284 | TCF7L1     | 6,38E-04 | 1,52E-02 | -0,47 | 0,72 |

|                 |            |          |          |       |      |
|-----------------|------------|----------|----------|-------|------|
| ENSG00000141456 | PELP1      | 6,42E-04 | 1,52E-02 | -0,24 | 0,84 |
| ENSG00000120820 | GLT8D2     | 6,43E-04 | 1,52E-02 | 0,53  | 1,44 |
| ENSG00000116209 | TMEM59     | 6,45E-04 | 1,52E-02 | 0,22  | 1,17 |
| ENSG00000185236 | RAB11B     | 6,45E-04 | 1,52E-02 | -0,29 | 0,82 |
| ENSG00000235823 | OLMALINC   | 6,46E-04 | 1,52E-02 | -0,67 | 0,63 |
| ENSG00000101916 | TLR8       | 6,50E-04 | 1,53E-02 | 0,37  | 1,29 |
| ENSG00000197530 | MIB2       | 6,55E-04 | 1,54E-02 | -0,23 | 0,85 |
| ENSG00000118432 | CNR1       | 6,58E-04 | 1,54E-02 | -0,60 | 0,66 |
| ENSG00000164659 | KIAA1324L  | 6,61E-04 | 1,55E-02 | -0,40 | 0,76 |
| ENSG00000264672 | SEPT4-AS1  | 6,62E-04 | 1,55E-02 | 0,65  | 1,57 |
| ENSG00000115232 | ITGA4      | 6,66E-04 | 1,56E-02 | 0,38  | 1,30 |
| ENSG00000262877 | AC110285.2 | 6,74E-04 | 1,57E-02 | -0,48 | 0,72 |
| ENSG00000172586 | CHCHD1     | 6,80E-04 | 1,59E-02 | 0,34  | 1,26 |
| ENSG00000074416 | MGLL       | 6,82E-04 | 1,59E-02 | -0,60 | 0,66 |
| ENSG00000105287 | PRKD2      | 6,83E-04 | 1,59E-02 | -0,34 | 0,79 |
| ENSG00000072422 | RHOBTB1    | 6,86E-04 | 1,59E-02 | 0,28  | 1,22 |
| ENSG00000184381 | PLA2G6     | 6,93E-04 | 1,61E-02 | -0,37 | 0,77 |
| ENSG00000234093 | RPS15AP11  | 6,95E-04 | 1,61E-02 | 0,45  | 1,36 |
| ENSG00000215183 | MSMP       | 6,97E-04 | 1,61E-02 | 2,17  | 4,50 |
| ENSG00000150681 | RGS18      | 7,00E-04 | 1,62E-02 | 0,37  | 1,29 |
| ENSG00000143106 | PSMA5      | 7,01E-04 | 1,62E-02 | 0,25  | 1,19 |
| ENSG00000005882 | PDK2       | 7,08E-04 | 1,63E-02 | -0,30 | 0,81 |
| ENSG00000129353 | SLC44A2    | 7,09E-04 | 1,63E-02 | -0,29 | 0,82 |
| ENSG00000127511 | SIN3B      | 7,09E-04 | 1,63E-02 | -0,22 | 0,86 |
| ENSG00000157927 | RADIL      | 7,10E-04 | 1,63E-02 | -0,43 | 0,74 |
| ENSG00000139329 | LUM        | 7,15E-04 | 1,64E-02 | 0,83  | 1,78 |
| ENSG00000065154 | OAT        | 7,17E-04 | 1,64E-02 | 0,29  | 1,22 |
| ENSG00000167395 | ZNF646     | 7,18E-04 | 1,64E-02 | -0,29 | 0,82 |
| ENSG00000100065 | CARD10     | 7,19E-04 | 1,64E-02 | -0,42 | 0,75 |
| ENSG00000005381 | MPO        | 7,21E-04 | 1,64E-02 | 0,74  | 1,67 |
| ENSG00000041357 | PSMA4      | 7,22E-04 | 1,64E-02 | 0,25  | 1,19 |
| ENSG00000211950 | IGHV1-24   | 7,23E-04 | 1,64E-02 | 1,11  | 2,15 |
| ENSG00000136731 | UGGT1      | 7,27E-04 | 1,65E-02 | 0,19  | 1,14 |
| ENSG00000108829 | LRRCS9     | 7,39E-04 | 1,68E-02 | 0,43  | 1,35 |
| ENSG00000113916 | BCL6       | 7,41E-04 | 1,68E-02 | -0,36 | 0,78 |
| ENSG00000242498 | ARPIN      | 7,44E-04 | 1,68E-02 | -0,25 | 0,84 |
| ENSG00000177685 | CRACR2B    | 7,46E-04 | 1,68E-02 | -0,47 | 0,72 |
| ENSG00000177469 | CAVIN1     | 7,46E-04 | 1,68E-02 | -0,32 | 0,80 |
| ENSG00000112787 | FBRSL1     | 7,49E-04 | 1,68E-02 | -0,31 | 0,80 |
| ENSG00000105204 | DYRK1B     | 7,50E-04 | 1,68E-02 | -0,35 | 0,78 |
| ENSG00000073737 | DHRS9      | 7,50E-04 | 1,68E-02 | 0,96  | 1,94 |
| ENSG00000184254 | ALDH1A3    | 7,53E-04 | 1,69E-02 | 0,53  | 1,45 |
| ENSG00000119669 | IRF2BPL    | 7,57E-04 | 1,69E-02 | -0,39 | 0,76 |
| ENSG00000220842 | RPL21P16   | 7,58E-04 | 1,69E-02 | 0,33  | 1,25 |
| ENSG00000183255 | PTTG1IP    | 7,58E-04 | 1,69E-02 | 0,25  | 1,19 |
| ENSG00000100478 | AP4S1      | 7,62E-04 | 1,70E-02 | 0,28  | 1,22 |
| ENSG00000198208 | RPS6KL1    | 7,62E-04 | 1,70E-02 | -0,50 | 0,71 |



|                 |          |          |          |       |      |
|-----------------|----------|----------|----------|-------|------|
| ENSG00000198910 | L1CAM    | 7,63E-04 | 1,70E-02 | -0,89 | 0,54 |
| ENSG00000055483 | USP36    | 7,70E-04 | 1,71E-02 | -0,22 | 0,86 |
| ENSG00000107949 | BCCIP    | 7,73E-04 | 1,71E-02 | 0,22  | 1,17 |
| ENSG00000133112 | TPT1     | 7,74E-04 | 1,72E-02 | 0,21  | 1,15 |
| ENSG00000073910 | FRY      | 7,82E-04 | 1,73E-02 | -0,37 | 0,77 |
| ENSG00000154127 | UBASH3B  | 7,83E-04 | 1,73E-02 | 0,56  | 1,47 |
| ENSG00000224470 | ATXN1L   | 7,92E-04 | 1,75E-02 | -0,26 | 0,83 |
| ENSG00000163938 | GNL3     | 7,98E-04 | 1,76E-02 | 0,33  | 1,26 |
| ENSG00000099256 | PRTFDC1  | 7,98E-04 | 1,76E-02 | 0,39  | 1,31 |
| ENSG00000130940 | CASZ1    | 8,00E-04 | 1,76E-02 | -0,44 | 0,74 |
| ENSG00000198763 | MT-ND2   | 8,03E-04 | 1,76E-02 | -0,57 | 0,67 |
| ENSG00000186160 | CYP4Z1   | 8,04E-04 | 1,76E-02 | -1,00 | 0,50 |
| ENSG00000147036 | LANCL3   | 8,04E-04 | 1,76E-02 | 0,67  | 1,59 |
| ENSG00000117643 | MAN1C1   | 8,04E-04 | 1,76E-02 | -0,36 | 0,78 |
| ENSG00000164405 | UQCRQ    | 8,05E-04 | 1,76E-02 | 0,30  | 1,23 |
| ENSG00000136628 | EPRS     | 8,05E-04 | 1,76E-02 | 0,22  | 1,17 |
| ENSG00000277775 | HIST1H3F | 8,06E-04 | 1,76E-02 | 0,57  | 1,49 |
| ENSG00000171791 | BCL2     | 8,08E-04 | 1,76E-02 | -0,38 | 0,77 |
| ENSG00000169291 | SHE      | 8,09E-04 | 1,76E-02 | -0,30 | 0,81 |
| ENSG00000142910 | TINAGL1  | 8,10E-04 | 1,76E-02 | -0,41 | 0,75 |
| ENSG00000179776 | CDH5     | 8,11E-04 | 1,76E-02 | -0,28 | 0,82 |
| ENSG00000106278 | PTPRZ1   | 8,12E-04 | 1,76E-02 | 0,52  | 1,43 |
| ENSG00000170525 | PFKFB3   | 8,19E-04 | 1,77E-02 | -0,49 | 0,71 |
| ENSG00000122515 | ZMIZ2    | 8,20E-04 | 1,77E-02 | -0,27 | 0,83 |
| ENSG00000126822 | PLEKHG3  | 8,20E-04 | 1,77E-02 | -0,32 | 0,80 |
| ENSG00000118508 | RAB32    | 8,22E-04 | 1,77E-02 | 0,29  | 1,22 |
| ENSG00000203685 | STUM     | 8,26E-04 | 1,77E-02 | -0,55 | 0,69 |
| ENSG00000123009 | NME2P1   | 8,26E-04 | 1,77E-02 | 0,38  | 1,30 |
| ENSG00000196352 | CD55     | 8,27E-04 | 1,77E-02 | 0,70  | 1,62 |
| ENSG00000125977 | EIF2S2   | 8,27E-04 | 1,77E-02 | 0,22  | 1,16 |
| ENSG00000099308 | MAST3    | 8,34E-04 | 1,78E-02 | -0,37 | 0,77 |
| ENSG00000112796 | ENPP5    | 8,42E-04 | 1,80E-02 | -0,55 | 0,69 |
| ENSG00000053918 | KCNQ1    | 8,42E-04 | 1,80E-02 | -0,40 | 0,76 |
| ENSG00000172339 | ALG14    | 8,45E-04 | 1,80E-02 | 0,29  | 1,22 |
| ENSG00000142892 | PIGK     | 8,45E-04 | 1,80E-02 | 0,31  | 1,24 |
| ENSG00000004399 | PLXND1   | 8,53E-04 | 1,81E-02 | -0,30 | 0,81 |
| ENSG00000136010 | ALDH1L2  | 8,56E-04 | 1,82E-02 | 0,54  | 1,45 |
| ENSG00000198888 | MT-ND1   | 8,63E-04 | 1,83E-02 | -0,49 | 0,71 |
| ENSG00000066294 | CD84     | 8,66E-04 | 1,83E-02 | 0,54  | 1,45 |
| ENSG00000005022 | SLC25A5  | 8,66E-04 | 1,83E-02 | 0,23  | 1,17 |
| ENSG00000179639 | FCER1A   | 8,67E-04 | 1,83E-02 | 0,46  | 1,37 |
| ENSG00000172061 | LRRC15   | 8,68E-04 | 1,83E-02 | 0,77  | 1,70 |
| ENSG00000148154 | UGCG     | 8,70E-04 | 1,83E-02 | 0,27  | 1,21 |
| ENSG00000136827 | TOR1A    | 8,72E-04 | 1,84E-02 | 0,18  | 1,13 |
| ENSG00000186642 | PDE2A    | 8,75E-04 | 1,84E-02 | -0,42 | 0,75 |
| ENSG00000047249 | ATP6V1H  | 8,75E-04 | 1,84E-02 | 0,26  | 1,20 |
| ENSG00000169418 | NPR1     | 8,85E-04 | 1,85E-02 | -0,59 | 0,67 |

|                 |           |          |          |       |      |
|-----------------|-----------|----------|----------|-------|------|
| ENSG00000107282 | APBA1     | 8,86E-04 | 1,85E-02 | -0,31 | 0,81 |
| ENSG00000215041 | NEURL4    | 8,86E-04 | 1,85E-02 | -0,26 | 0,83 |
| ENSG00000033170 | FUT8      | 8,87E-04 | 1,85E-02 | 0,25  | 1,19 |
| ENSG00000176749 | CDK5R1    | 8,89E-04 | 1,85E-02 | 0,50  | 1,41 |
| ENSG00000277791 | PSMB3     | 8,90E-04 | 1,85E-02 | 0,22  | 1,16 |
| ENSG00000214357 | NEURL1B   | 8,95E-04 | 1,86E-02 | -0,37 | 0,77 |
| ENSG00000054598 | FOXC1     | 8,97E-04 | 1,86E-02 | -0,32 | 0,80 |
| ENSG00000060491 | OGFR      | 8,97E-04 | 1,86E-02 | -0,18 | 0,88 |
| ENSG00000113013 | HSPA9     | 8,97E-04 | 1,86E-02 | 0,19  | 1,14 |
| ENSG00000164330 | EBF1      | 8,98E-04 | 1,86E-02 | -0,27 | 0,83 |
| ENSG00000163597 | SNHG16    | 8,98E-04 | 1,86E-02 | 0,15  | 1,11 |
| ENSG00000151150 | ANK3      | 9,05E-04 | 1,87E-02 | 0,49  | 1,40 |
| ENSG00000081277 | PKP1      | 9,07E-04 | 1,87E-02 | -0,77 | 0,59 |
| ENSG00000148841 | ITPRIP    | 9,07E-04 | 1,87E-02 | -0,34 | 0,79 |
| ENSG00000183527 | PSMG1     | 9,10E-04 | 1,87E-02 | 0,30  | 1,24 |
| ENSG00000058262 | SEC61A1   | 9,14E-04 | 1,88E-02 | 0,30  | 1,23 |
| ENSG00000113140 | SPARC     | 9,15E-04 | 1,88E-02 | 0,64  | 1,56 |
| ENSG00000154845 | PPP4R1    | 9,18E-04 | 1,88E-02 | 0,16  | 1,11 |
| ENSG00000175054 | ATR       | 9,22E-04 | 1,89E-02 | 0,22  | 1,17 |
| ENSG00000108231 | LGI1      | 9,23E-04 | 1,89E-02 | -1,29 | 0,41 |
| ENSG00000275023 | MLLT6     | 9,24E-04 | 1,89E-02 | -0,23 | 0,85 |
| ENSG00000110108 | TMEM109   | 9,25E-04 | 1,89E-02 | -0,28 | 0,83 |
| ENSG00000136068 | FLNB      | 9,27E-04 | 1,89E-02 | -0,21 | 0,87 |
| ENSG00000163430 | FSTL1     | 9,32E-04 | 1,90E-02 | 0,39  | 1,31 |
| ENSG00000082146 | STRADB    | 9,36E-04 | 1,90E-02 | 0,31  | 1,24 |
| ENSG00000167548 | KMT2D     | 9,39E-04 | 1,90E-02 | -0,35 | 0,79 |
| ENSG00000237668 | RPS15AP38 | 9,40E-04 | 1,90E-02 | 0,29  | 1,22 |
| ENSG00000166441 | RPL27A    | 9,42E-04 | 1,90E-02 | 0,20  | 1,15 |
| ENSG00000265354 | TIMM23    | 9,43E-04 | 1,90E-02 | 0,27  | 1,20 |
| ENSG00000105662 | CRTC1     | 9,44E-04 | 1,90E-02 | -0,35 | 0,78 |
| ENSG00000101335 | MYL9      | 9,44E-04 | 1,90E-02 | -0,45 | 0,73 |
| ENSG00000118217 | ATF6      | 9,47E-04 | 1,91E-02 | 0,13  | 1,10 |
| ENSG00000168079 | SCARA5    | 9,54E-04 | 1,92E-02 | 0,97  | 1,95 |
| ENSG00000131469 | RPL27     | 9,55E-04 | 1,92E-02 | 0,20  | 1,15 |
| ENSG00000127080 | IPPK      | 9,56E-04 | 1,92E-02 | 0,31  | 1,24 |
| ENSG00000184384 | MAML2     | 9,58E-04 | 1,92E-02 | -0,24 | 0,85 |
| ENSG00000101444 | AHCY      | 9,59E-04 | 1,92E-02 | 0,23  | 1,17 |
| ENSG00000175785 | PRIMA1    | 9,67E-04 | 1,93E-02 | -0,97 | 0,51 |
| ENSG00000118113 | MMP8      | 9,67E-04 | 1,93E-02 | 1,17  | 2,26 |
| ENSG00000139304 | PTPRQ     | 9,68E-04 | 1,93E-02 | -1,21 | 0,43 |
| ENSG00000163083 | INHBB     | 9,71E-04 | 1,94E-02 | -0,68 | 0,62 |
| ENSG00000197102 | DYNC1H1   | 9,75E-04 | 1,94E-02 | -0,20 | 0,87 |
| ENSG00000234782 | TPT1P9    | 9,76E-04 | 1,94E-02 | 0,27  | 1,20 |
| ENSG00000183779 | ZNF703    | 9,76E-04 | 1,94E-02 | -0,50 | 0,71 |
| ENSG00000139372 | TDG       | 9,79E-04 | 1,94E-02 | 0,35  | 1,27 |
| ENSG00000110911 | SLC11A2   | 9,82E-04 | 1,94E-02 | 0,22  | 1,17 |
| ENSG00000160588 | MPZL3     | 9,84E-04 | 1,94E-02 | 0,57  | 1,49 |

|                 |         |          |          |       |      |
|-----------------|---------|----------|----------|-------|------|
| ENSG00000111206 | FOXM1   | 9,85E-04 | 1,94E-02 | 0,92  | 1,90 |
| ENSG00000163584 | RPL22L1 | 9,85E-04 | 1,94E-02 | 0,39  | 1,31 |
| ENSG00000129083 | COPB1   | 9,86E-04 | 1,94E-02 | 0,25  | 1,19 |
| ENSG00000160285 | LSS     | 9,86E-04 | 1,94E-02 | -0,31 | 0,81 |
| ENSG00000140848 | CPNE2   | 9,89E-04 | 1,95E-02 | -0,19 | 0,88 |
| ENSG00000181163 | NPM1    | 9,90E-04 | 1,95E-02 | 0,26  | 1,20 |
| ENSG00000102606 | ARHGEF7 | 9,93E-04 | 1,95E-02 | -0,21 | 0,87 |
| ENSG00000143126 | CELSR2  | 9,93E-04 | 1,95E-02 | -0,38 | 0,77 |
| ENSG00000136560 | TANK    | 9,94E-04 | 1,95E-02 | 0,21  | 1,16 |
| ENSG00000134121 | CHL1    | 1,00E-03 | 1,96E-02 | 0,30  | 1,23 |
| ENSG00000144810 | COL8A1  | 1,00E-03 | 1,96E-02 | 0,24  | 1,18 |
| ENSG00000172840 | PDP2    | 1,01E-03 | 1,97E-02 | -0,26 | 0,83 |
| ENSG00000214194 | SMIM30  | 1,01E-03 | 1,98E-02 | 0,34  | 1,26 |
| ENSG00000175662 | TOM1L2  | 1,02E-03 | 1,98E-02 | -0,25 | 0,84 |
| ENSG00000143222 | UFC1    | 1,02E-03 | 1,99E-02 | 0,27  | 1,20 |
| ENSG00000203485 | INF2    | 1,03E-03 | 1,99E-02 | -0,29 | 0,82 |
| ENSG00000128606 | LRRC17  | 1,03E-03 | 1,99E-02 | 0,53  | 1,44 |
| ENSG00000112210 | RAB23   | 1,03E-03 | 1,99E-02 | 0,33  | 1,26 |
| ENSG00000165795 | NDRG2   | 1,03E-03 | 1,99E-02 | -0,50 | 0,71 |
| ENSG00000136937 | NCBP1   | 1,03E-03 | 1,99E-02 | 0,25  | 1,19 |
| ENSG00000185920 | PTCH1   | 1,03E-03 | 1,99E-02 | -0,43 | 0,74 |
| ENSG00000033178 | UBA6    | 1,03E-03 | 1,99E-02 | 0,24  | 1,18 |
| ENSG00000131507 | NDFIP1  | 1,03E-03 | 1,99E-02 | 0,16  | 1,12 |
| ENSG00000177464 | GPR4    | 1,04E-03 | 2,01E-02 | -0,56 | 0,68 |
| ENSG00000075413 | MARK3   | 1,05E-03 | 2,01E-02 | 0,19  | 1,14 |
| ENSG00000155438 | NIFK    | 1,05E-03 | 2,01E-02 | 0,26  | 1,20 |
| ENSG00000137804 | NUSAP1  | 1,05E-03 | 2,01E-02 | 0,62  | 1,53 |
| ENSG00000128524 | ATP6V1F | 1,06E-03 | 2,03E-02 | 0,33  | 1,25 |
| ENSG00000124191 | TOX2    | 1,07E-03 | 2,04E-02 | -0,52 | 0,70 |
| ENSG00000115226 | FNDC4   | 1,07E-03 | 2,04E-02 | 0,29  | 1,22 |
| ENSG00000153902 | LGI4    | 1,07E-03 | 2,05E-02 | -0,43 | 0,74 |
| ENSG00000196262 | PPIA    | 1,08E-03 | 2,05E-02 | 0,19  | 1,14 |
| ENSG00000071246 | VASH1   | 1,08E-03 | 2,05E-02 | -0,23 | 0,85 |
| ENSG00000114446 | IFT57   | 1,08E-03 | 2,05E-02 | 0,20  | 1,15 |
| ENSG00000110218 | PANX1   | 1,08E-03 | 2,06E-02 | 0,27  | 1,20 |
| ENSG00000014824 | SLC30A9 | 1,09E-03 | 2,06E-02 | 0,24  | 1,18 |
| ENSG00000132341 | RAN     | 1,09E-03 | 2,07E-02 | 0,24  | 1,18 |
| ENSG00000050165 | DKK3    | 1,09E-03 | 2,07E-02 | 0,63  | 1,55 |
| ENSG00000182481 | KPNA2   | 1,10E-03 | 2,07E-02 | 0,32  | 1,25 |
| ENSG00000177150 | FAM210A | 1,10E-03 | 2,08E-02 | 0,29  | 1,23 |
| ENSG00000137449 | CPEB2   | 1,10E-03 | 2,08E-02 | -0,21 | 0,87 |
| ENSG00000041515 | MYO16   | 1,11E-03 | 2,08E-02 | -0,78 | 0,58 |
| ENSG00000138496 | PARP9   | 1,11E-03 | 2,08E-02 | 0,27  | 1,20 |
| ENSG00000105576 | TNPO2   | 1,11E-03 | 2,08E-02 | -0,23 | 0,85 |
| ENSG00000151276 | MAGI1   | 1,11E-03 | 2,08E-02 | -0,23 | 0,85 |
| ENSG00000146250 | PRSS35  | 1,11E-03 | 2,08E-02 | 1,08  | 2,12 |
| ENSG00000173269 | MMRN2   | 1,11E-03 | 2,08E-02 | -0,31 | 0,81 |

|                 |            |          |          |       |      |
|-----------------|------------|----------|----------|-------|------|
| ENSG00000090520 | DNAJB11    | 1,11E-03 | 2,08E-02 | 0,26  | 1,20 |
| ENSG00000113369 | ARRDC3     | 1,12E-03 | 2,10E-02 | 0,26  | 1,20 |
| ENSG00000074964 | ARHGEF10L  | 1,12E-03 | 2,10E-02 | -0,22 | 0,86 |
| ENSG00000137509 | PRCP       | 1,12E-03 | 2,10E-02 | 0,21  | 1,16 |
| ENSG00000196218 | RYR1       | 1,13E-03 | 2,10E-02 | -0,49 | 0,71 |
| ENSG00000197965 | MPZL1      | 1,13E-03 | 2,10E-02 | 0,32  | 1,25 |
| ENSG00000140406 | TLNRD1     | 1,13E-03 | 2,10E-02 | -0,28 | 0,82 |
| ENSG00000157657 | ZNF618     | 1,13E-03 | 2,10E-02 | -0,28 | 0,82 |
| ENSG00000078699 | CBFA2T2    | 1,14E-03 | 2,12E-02 | -0,22 | 0,86 |
| ENSG00000205903 | ZNF316     | 1,14E-03 | 2,12E-02 | -0,32 | 0,80 |
| ENSG00000134419 | RPS15A     | 1,15E-03 | 2,12E-02 | 0,23  | 1,17 |
| ENSG00000171368 | TPPP       | 1,15E-03 | 2,13E-02 | -0,77 | 0,59 |
| ENSG00000163468 | CCT3       | 1,16E-03 | 2,14E-02 | 0,26  | 1,19 |
| ENSG00000163697 | APBB2      | 1,16E-03 | 2,14E-02 | -0,31 | 0,81 |
| ENSG00000138029 | HADHB      | 1,16E-03 | 2,15E-02 | 0,18  | 1,13 |
| ENSG00000099904 | ZDHHC8     | 1,17E-03 | 2,15E-02 | -0,31 | 0,81 |
| ENSG00000072135 | PTPN18     | 1,17E-03 | 2,15E-02 | -0,20 | 0,87 |
| ENSG00000155368 | DBI        | 1,17E-03 | 2,15E-02 | 0,23  | 1,17 |
| ENSG00000151466 | SCLT1      | 1,18E-03 | 2,16E-02 | 0,22  | 1,17 |
| ENSG00000147604 | RPL7       | 1,18E-03 | 2,17E-02 | 0,21  | 1,16 |
| ENSG00000168679 | SLC16A4    | 1,18E-03 | 2,17E-02 | 0,32  | 1,25 |
| ENSG00000236603 | RANP1      | 1,19E-03 | 2,17E-02 | 0,29  | 1,22 |
| ENSG00000005187 | ACSM3      | 1,19E-03 | 2,17E-02 | 0,71  | 1,63 |
| ENSG00000227008 | AL009174.1 | 1,19E-03 | 2,17E-02 | 0,24  | 1,18 |
| ENSG00000150337 | FCGR1A     | 1,19E-03 | 2,17E-02 | 0,71  | 1,63 |
| ENSG00000049860 | HEXB       | 1,20E-03 | 2,18E-02 | 0,31  | 1,24 |
| ENSG00000166783 | MARF1      | 1,20E-03 | 2,18E-02 | -0,25 | 0,84 |
| ENSG00000156466 | GDF6       | 1,20E-03 | 2,18E-02 | 1,95  | 3,87 |
| ENSG00000226415 | TPI1P1     | 1,20E-03 | 2,18E-02 | 0,33  | 1,26 |
| ENSG00000181830 | SLC35C1    | 1,20E-03 | 2,18E-02 | -0,33 | 0,80 |
| ENSG00000156860 | FBRS       | 1,21E-03 | 2,19E-02 | -0,31 | 0,81 |
| ENSG00000283213 | AC130466.1 | 1,22E-03 | 2,20E-02 | -0,63 | 0,65 |
| ENSG00000068489 | PRR11      | 1,22E-03 | 2,20E-02 | 0,48  | 1,39 |
| ENSG00000111962 | UST        | 1,22E-03 | 2,20E-02 | 0,38  | 1,30 |
| ENSG00000205413 | SAMD9      | 1,22E-03 | 2,21E-02 | 0,25  | 1,19 |
| ENSG00000137269 | LRRC1      | 1,22E-03 | 2,21E-02 | 0,23  | 1,17 |
| ENSG00000148357 | HMCN2      | 1,24E-03 | 2,22E-02 | -0,94 | 0,52 |
| ENSG00000166257 | SCN3B      | 1,24E-03 | 2,22E-02 | 0,64  | 1,56 |
| ENSG00000186854 | TRABD2A    | 1,24E-03 | 2,23E-02 | 0,62  | 1,54 |
| ENSG00000070444 | MNT        | 1,25E-03 | 2,24E-02 | -0,31 | 0,81 |
| ENSG00000197724 | PHF2       | 1,25E-03 | 2,24E-02 | -0,20 | 0,87 |
| ENSG00000163638 | ADAMTS9    | 1,25E-03 | 2,24E-02 | 0,47  | 1,39 |
| ENSG00000100106 | TRIOBP     | 1,25E-03 | 2,24E-02 | -0,23 | 0,85 |
| ENSG00000107821 | KAZALD1    | 1,27E-03 | 2,26E-02 | 0,59  | 1,51 |
| ENSG00000113407 | TARS       | 1,27E-03 | 2,27E-02 | 0,25  | 1,19 |
| ENSG00000107937 | GTPBP4     | 1,28E-03 | 2,29E-02 | 0,21  | 1,16 |
| ENSG00000035141 | FAM136A    | 1,29E-03 | 2,29E-02 | 0,30  | 1,23 |

|                 |            |          |          |       |      |
|-----------------|------------|----------|----------|-------|------|
| ENSG00000134323 | MYCN       | 1,29E-03 | 2,30E-02 | -0,53 | 0,69 |
| ENSG00000059145 | UNKL       | 1,30E-03 | 2,31E-02 | -0,27 | 0,83 |
| ENSG00000155307 | SAMSN1     | 1,30E-03 | 2,31E-02 | 0,45  | 1,37 |
| ENSG00000164879 | CA3        | 1,30E-03 | 2,31E-02 | 0,48  | 1,40 |
| ENSG00000166888 | STAT6      | 1,30E-03 | 2,31E-02 | -0,19 | 0,88 |
| ENSG00000100154 | TTC28      | 1,31E-03 | 2,32E-02 | -0,26 | 0,83 |
| ENSG00000134259 | NGF        | 1,31E-03 | 2,32E-02 | 0,49  | 1,40 |
| ENSG00000143545 | RAB13      | 1,31E-03 | 2,32E-02 | 0,34  | 1,27 |
| ENSG00000188177 | ZC3H6      | 1,32E-03 | 2,32E-02 | -0,29 | 0,82 |
| ENSG00000135119 | RNFT2      | 1,32E-03 | 2,32E-02 | -0,65 | 0,64 |
| ENSG00000182606 | TRAK1      | 1,34E-03 | 2,35E-02 | -0,24 | 0,85 |
| ENSG00000072042 | RDH11      | 1,34E-03 | 2,35E-02 | 0,27  | 1,20 |
| ENSG00000052126 | PLEKHA5    | 1,34E-03 | 2,35E-02 | 0,30  | 1,23 |
| ENSG00000156521 | TYSND1     | 1,34E-03 | 2,35E-02 | -0,25 | 0,84 |
| ENSG00000112936 | C7         | 1,35E-03 | 2,35E-02 | 0,47  | 1,38 |
| ENSG00000163531 | NFASC      | 1,35E-03 | 2,35E-02 | -0,49 | 0,71 |
| ENSG00000065054 | SLC9A3R2   | 1,35E-03 | 2,35E-02 | -0,29 | 0,82 |
| ENSG00000230989 | HSBP1      | 1,35E-03 | 2,36E-02 | 0,29  | 1,22 |
| ENSG00000235552 | RPL6P27    | 1,35E-03 | 2,36E-02 | 0,18  | 1,14 |
| ENSG00000119912 | IDE        | 1,36E-03 | 2,36E-02 | 0,19  | 1,14 |
| ENSG00000119655 | NPC2       | 1,36E-03 | 2,37E-02 | 0,28  | 1,21 |
| ENSG00000170312 | CDK1       | 1,36E-03 | 2,37E-02 | 0,46  | 1,38 |
| ENSG00000117410 | ATP6V0B    | 1,36E-03 | 2,37E-02 | 0,37  | 1,30 |
| ENSG00000253293 | HOXA10     | 1,37E-03 | 2,38E-02 | -0,23 | 0,86 |
| ENSG00000184144 | CNTN2      | 1,37E-03 | 2,38E-02 | -0,80 | 0,57 |
| ENSG00000141367 | CLTC       | 1,37E-03 | 2,38E-02 | 0,16  | 1,12 |
| ENSG00000143850 | PLEKHA6    | 1,37E-03 | 2,38E-02 | -0,66 | 0,63 |
| ENSG00000091127 | PUS7       | 1,37E-03 | 2,38E-02 | 0,26  | 1,20 |
| ENSG00000182544 | MFSD5      | 1,38E-03 | 2,38E-02 | 0,25  | 1,19 |
| ENSG00000187634 | SAMD11     | 1,38E-03 | 2,39E-02 | 0,60  | 1,51 |
| ENSG00000100219 | XBP1       | 1,38E-03 | 2,39E-02 | 0,29  | 1,22 |
| ENSG00000101955 | SRPX       | 1,39E-03 | 2,39E-02 | 0,82  | 1,76 |
| ENSG00000135148 | TRAFD1     | 1,39E-03 | 2,40E-02 | 0,22  | 1,17 |
| ENSG00000137812 | KNL1       | 1,40E-03 | 2,40E-02 | 0,71  | 1,63 |
| ENSG00000188001 | TPRG1      | 1,40E-03 | 2,41E-02 | -0,35 | 0,78 |
| ENSG00000053747 | LAMA3      | 1,40E-03 | 2,41E-02 | -0,47 | 0,72 |
| ENSG00000081237 | PTPRC      | 1,41E-03 | 2,41E-02 | 0,35  | 1,28 |
| ENSG00000110700 | RPS13      | 1,41E-03 | 2,41E-02 | 0,21  | 1,16 |
| ENSG00000114626 | ABTB1      | 1,41E-03 | 2,41E-02 | -0,34 | 0,79 |
| ENSG00000164442 | CITED2     | 1,41E-03 | 2,41E-02 | -0,47 | 0,72 |
| ENSG00000112972 | HMGCS1     | 1,42E-03 | 2,42E-02 | 0,19  | 1,14 |
| ENSG00000144730 | IL17RD     | 1,43E-03 | 2,43E-02 | -0,38 | 0,77 |
| ENSG00000200087 | SNORA73B   | 1,43E-03 | 2,44E-02 | 0,39  | 1,31 |
| ENSG00000244398 | AC116533.1 | 1,43E-03 | 2,44E-02 | 0,21  | 1,15 |
| ENSG00000130479 | MAP1S      | 1,44E-03 | 2,44E-02 | -0,36 | 0,78 |
| ENSG00000198618 | PPIAP22    | 1,44E-03 | 2,44E-02 | 0,21  | 1,16 |
| ENSG00000163749 | CCDC158    | 1,44E-03 | 2,44E-02 | 0,64  | 1,56 |

|                 |            |          |          |       |      |
|-----------------|------------|----------|----------|-------|------|
| ENSG00000110799 | VWF        | 1,44E-03 | 2,44E-02 | -0,56 | 0,68 |
| ENSG00000137076 | TLN1       | 1,44E-03 | 2,44E-02 | -0,29 | 0,82 |
| ENSG00000112294 | ALDH5A1    | 1,44E-03 | 2,44E-02 | -0,32 | 0,80 |
| ENSG00000109111 | SUPT6H     | 1,45E-03 | 2,45E-02 | -0,18 | 0,88 |
| ENSG00000172216 | CEBPB      | 1,45E-03 | 2,45E-02 | -0,39 | 0,76 |
| ENSG00000001036 | FUCA2      | 1,45E-03 | 2,45E-02 | 0,23  | 1,17 |
| ENSG00000182809 | CRIP2      | 1,45E-03 | 2,45E-02 | -0,29 | 0,82 |
| ENSG00000183813 | CCR4       | 1,46E-03 | 2,45E-02 | 0,85  | 1,81 |
| ENSG00000147113 | DIPK2B     | 1,46E-03 | 2,45E-02 | -0,27 | 0,83 |
| ENSG00000066629 | EML1       | 1,46E-03 | 2,45E-02 | 0,26  | 1,19 |
| ENSG00000077232 | DNAJC10    | 1,46E-03 | 2,45E-02 | 0,19  | 1,14 |
| ENSG00000171045 | TSNARE1    | 1,47E-03 | 2,47E-02 | -0,30 | 0,81 |
| ENSG00000244716 | BX679664.3 | 1,48E-03 | 2,47E-02 | 0,24  | 1,18 |
| ENSG00000083223 | TUT7       | 1,48E-03 | 2,47E-02 | 0,22  | 1,16 |
| ENSG00000172901 | LVRN       | 1,48E-03 | 2,47E-02 | -0,52 | 0,70 |
| ENSG00000149577 | SIDT2      | 1,48E-03 | 2,47E-02 | -0,24 | 0,84 |
| ENSG00000106290 | TAF6       | 1,48E-03 | 2,47E-02 | -0,24 | 0,85 |
| ENSG00000173267 | SNCG       | 1,49E-03 | 2,48E-02 | -0,70 | 0,61 |
| ENSG00000131100 | ATP6V1E1   | 1,49E-03 | 2,48E-02 | 0,26  | 1,20 |
| ENSG00000075415 | SLC25A3    | 1,50E-03 | 2,48E-02 | 0,13  | 1,09 |
| ENSG00000126464 | PRR12      | 1,50E-03 | 2,48E-02 | -0,39 | 0,76 |
| ENSG00000143158 | MPC2       | 1,50E-03 | 2,48E-02 | 0,23  | 1,17 |
| ENSG00000068366 | ACSL4      | 1,50E-03 | 2,48E-02 | 0,25  | 1,19 |
| ENSG00000180900 | SCRIB      | 1,50E-03 | 2,48E-02 | -0,26 | 0,84 |
| ENSG00000064102 | INTS13     | 1,50E-03 | 2,48E-02 | 0,28  | 1,21 |
| ENSG00000175727 | MLXIP      | 1,50E-03 | 2,48E-02 | -0,24 | 0,84 |
| ENSG00000218426 | AL590867.2 | 1,51E-03 | 2,48E-02 | 0,21  | 1,16 |
| ENSG00000016864 | GLT8D1     | 1,51E-03 | 2,48E-02 | 0,26  | 1,20 |
| ENSG00000143621 | ILF2       | 1,51E-03 | 2,48E-02 | 0,18  | 1,13 |
| ENSG00000172139 | SLC9C1     | 1,51E-03 | 2,48E-02 | 0,93  | 1,91 |
| ENSG00000158445 | KCNB1      | 1,51E-03 | 2,48E-02 | -0,80 | 0,57 |
| ENSG00000147168 | IL2RG      | 1,52E-03 | 2,49E-02 | 0,49  | 1,41 |
| ENSG00000114942 | EEF1B2     | 1,52E-03 | 2,49E-02 | 0,23  | 1,17 |
| ENSG00000170266 | GLB1       | 1,52E-03 | 2,50E-02 | 0,27  | 1,20 |
| ENSG00000019485 | PRDM11     | 1,53E-03 | 2,51E-02 | -0,32 | 0,80 |
| ENSG00000143878 | RHOB       | 1,53E-03 | 2,51E-02 | -0,50 | 0,71 |
| ENSG00000005801 | ZNF195     | 1,53E-03 | 2,51E-02 | 0,22  | 1,17 |
| ENSG00000166794 | PPIB       | 1,54E-03 | 2,51E-02 | 0,30  | 1,23 |
| ENSG00000144649 | GASK1A     | 1,54E-03 | 2,51E-02 | 0,59  | 1,51 |
| ENSG00000047849 | MAP4       | 1,54E-03 | 2,51E-02 | -0,19 | 0,87 |
| ENSG00000090447 | TFAP4      | 1,55E-03 | 2,52E-02 | -0,33 | 0,80 |
| ENSG00000165973 | NELL1      | 1,55E-03 | 2,52E-02 | 0,88  | 1,84 |
| ENSG00000083168 | KAT6A      | 1,55E-03 | 2,52E-02 | -0,19 | 0,88 |
| ENSG00000179094 | AC129492.1 | 1,56E-03 | 2,52E-02 | -0,46 | 0,72 |
| ENSG00000111863 | ADTRP      | 1,56E-03 | 2,52E-02 | 1,10  | 2,14 |
| ENSG00000143603 | KCNN3      | 1,56E-03 | 2,53E-02 | -0,42 | 0,75 |
| ENSG00000100302 | RASD2      | 1,57E-03 | 2,53E-02 | -0,53 | 0,69 |

|                 |            |          |          |       |      |
|-----------------|------------|----------|----------|-------|------|
| ENSG00000056277 | ZNF280C    | 1,57E-03 | 2,53E-02 | 0,25  | 1,19 |
| ENSG00000154945 | ANKRD40    | 1,57E-03 | 2,53E-02 | -0,34 | 0,79 |
| ENSG00000275395 | FCGBP      | 1,57E-03 | 2,53E-02 | -0,57 | 0,68 |
| ENSG00000063241 | ISOC2      | 1,57E-03 | 2,53E-02 | 0,32  | 1,25 |
| ENSG00000141867 | BRD4       | 1,57E-03 | 2,53E-02 | -0,31 | 0,80 |
| ENSG00000104375 | STK3       | 1,57E-03 | 2,53E-02 | 0,21  | 1,15 |
| ENSG00000107201 | DDX58      | 1,58E-03 | 2,54E-02 | 0,25  | 1,19 |
| ENSG00000118705 | RPN2       | 1,58E-03 | 2,54E-02 | 0,23  | 1,17 |
| ENSG00000158089 | GALNT14    | 1,59E-03 | 2,55E-02 | 0,70  | 1,63 |
| ENSG00000141503 | MINK1      | 1,59E-03 | 2,55E-02 | -0,25 | 0,84 |
| ENSG00000082641 | NFE2L1     | 1,59E-03 | 2,55E-02 | -0,21 | 0,87 |
| ENSG00000036549 | AC118549.1 | 1,59E-03 | 2,55E-02 | 0,16  | 1,12 |
| ENSG00000111669 | TPI1       | 1,60E-03 | 2,55E-02 | 0,30  | 1,23 |
| ENSG00000114812 | VIPR1      | 1,60E-03 | 2,55E-02 | -0,50 | 0,71 |
| ENSG00000014257 | ACPP       | 1,60E-03 | 2,55E-02 | 0,72  | 1,64 |
| ENSG00000204131 | NHSL2      | 1,60E-03 | 2,55E-02 | -0,24 | 0,85 |
| ENSG00000011523 | CEP68      | 1,60E-03 | 2,55E-02 | -0,22 | 0,86 |
| ENSG00000132514 | CLEC10A    | 1,61E-03 | 2,56E-02 | 0,40  | 1,32 |
| ENSG00000060237 | WNK1       | 1,61E-03 | 2,56E-02 | -0,25 | 0,84 |
| ENSG00000197958 | RPL12      | 1,62E-03 | 2,56E-02 | 0,17  | 1,13 |
| ENSG00000106617 | PRKAG2     | 1,62E-03 | 2,56E-02 | -0,29 | 0,82 |
| ENSG00000233622 | CYP2T1P    | 1,62E-03 | 2,56E-02 | -0,65 | 0,64 |
| ENSG00000164576 | SAP30L     | 1,62E-03 | 2,56E-02 | -0,20 | 0,87 |
| ENSG00000082482 | KCNK2      | 1,62E-03 | 2,56E-02 | 1,01  | 2,01 |
| ENSG00000148082 | SHC3       | 1,62E-03 | 2,56E-02 | 0,84  | 1,80 |
| ENSG00000198198 | SZT2       | 1,63E-03 | 2,57E-02 | -0,22 | 0,86 |
| ENSG00000106004 | HOXA5      | 1,63E-03 | 2,57E-02 | -0,43 | 0,74 |
| ENSG00000169057 | MECP2      | 1,63E-03 | 2,57E-02 | -0,25 | 0,84 |
| ENSG00000121807 | CCR2       | 1,63E-03 | 2,57E-02 | 0,46  | 1,38 |
| ENSG00000147862 | NFIB       | 1,64E-03 | 2,57E-02 | -0,36 | 0,78 |
| ENSG00000135446 | CDK4       | 1,64E-03 | 2,57E-02 | 0,17  | 1,12 |
| ENSG00000166188 | ZNF319     | 1,64E-03 | 2,58E-02 | -0,33 | 0,80 |
| ENSG00000198719 | DLL1       | 1,65E-03 | 2,58E-02 | -0,40 | 0,76 |
| ENSG00000260077 | AC104794.2 | 1,65E-03 | 2,58E-02 | -0,47 | 0,72 |
| ENSG00000198113 | TOR4A      | 1,67E-03 | 2,60E-02 | -0,28 | 0,83 |
| ENSG00000126016 | AMOT       | 1,67E-03 | 2,60E-02 | -0,29 | 0,82 |
| ENSG00000131174 | COX7B      | 1,67E-03 | 2,60E-02 | 0,27  | 1,21 |
| ENSG00000267221 | C17orf113  | 1,67E-03 | 2,60E-02 | -0,56 | 0,68 |
| ENSG00000103264 | FBXO31     | 1,67E-03 | 2,60E-02 | -0,30 | 0,81 |
| ENSG00000123411 | IKZF4      | 1,67E-03 | 2,60E-02 | -0,33 | 0,80 |
| ENSG00000163913 | IFT122     | 1,67E-03 | 2,60E-02 | -0,28 | 0,82 |
| ENSG00000129562 | DAD1       | 1,67E-03 | 2,60E-02 | 0,21  | 1,16 |
| ENSG00000107263 | RAPGEF1    | 1,68E-03 | 2,61E-02 | -0,25 | 0,84 |
| ENSG00000177427 | MIEF2      | 1,68E-03 | 2,61E-02 | -0,29 | 0,82 |
| ENSG00000176142 | TMEM39A    | 1,68E-03 | 2,61E-02 | 0,25  | 1,19 |
| ENSG00000182253 | SYNM       | 1,69E-03 | 2,62E-02 | -0,41 | 0,75 |
| ENSG00000141429 | GALNT1     | 1,69E-03 | 2,62E-02 | 0,34  | 1,27 |

|                 |            |          |          |       |      |
|-----------------|------------|----------|----------|-------|------|
| ENSG00000186468 | RPS23      | 1,70E-03 | 2,62E-02 | 0,15  | 1,11 |
| ENSG00000271270 | TMCC1-AS1  | 1,70E-03 | 2,62E-02 | 0,51  | 1,42 |
| ENSG00000162878 | PKDCC      | 1,70E-03 | 2,62E-02 | -0,41 | 0,75 |
| ENSG00000140332 | TLE3       | 1,70E-03 | 2,62E-02 | -0,32 | 0,80 |
| ENSG00000163050 | COQ8A      | 1,71E-03 | 2,63E-02 | -0,23 | 0,85 |
| ENSG00000181929 | PRKAG1     | 1,71E-03 | 2,63E-02 | 0,19  | 1,14 |
| ENSG00000263266 | RPS7P1     | 1,72E-03 | 2,65E-02 | 0,20  | 1,15 |
| ENSG00000055163 | CYFIP2     | 1,72E-03 | 2,65E-02 | 0,41  | 1,33 |
| ENSG00000106803 | SEC61B     | 1,73E-03 | 2,66E-02 | 0,28  | 1,21 |
| ENSG00000171408 | PDE7B      | 1,74E-03 | 2,67E-02 | 0,27  | 1,21 |
| ENSG00000066697 | MSANTD3    | 1,74E-03 | 2,67E-02 | 0,45  | 1,37 |
| ENSG00000157152 | SYN2       | 1,74E-03 | 2,67E-02 | -0,80 | 0,58 |
| ENSG00000100243 | CYB5R3     | 1,75E-03 | 2,67E-02 | -0,30 | 0,81 |
| ENSG00000188738 | FSIP2      | 1,75E-03 | 2,67E-02 | 0,74  | 1,67 |
| ENSG00000132005 | RFX1       | 1,75E-03 | 2,67E-02 | -0,35 | 0,78 |
| ENSG00000148773 | MKI67      | 1,75E-03 | 2,67E-02 | 0,63  | 1,54 |
| ENSG00000187535 | IFT140     | 1,76E-03 | 2,67E-02 | -0,24 | 0,85 |
| ENSG00000172366 | MCRIP2     | 1,76E-03 | 2,67E-02 | 0,31  | 1,24 |
| ENSG00000256995 | AC084816.1 | 1,76E-03 | 2,67E-02 | -1,56 | 0,34 |
| ENSG00000165632 | TAF3       | 1,76E-03 | 2,68E-02 | -0,29 | 0,82 |
| ENSG00000142279 | WTIP       | 1,77E-03 | 2,68E-02 | -0,27 | 0,83 |
| ENSG00000111670 | GNPTAB     | 1,77E-03 | 2,68E-02 | 0,36  | 1,28 |
| ENSG00000081059 | TCF7       | 1,78E-03 | 2,69E-02 | 0,38  | 1,30 |
| ENSG00000145283 | SLC10A6    | 1,78E-03 | 2,70E-02 | -0,79 | 0,58 |
| ENSG00000185561 | TLCD2      | 1,79E-03 | 2,70E-02 | -0,45 | 0,73 |
| ENSG00000123473 | STIL       | 1,79E-03 | 2,70E-02 | 0,45  | 1,37 |
| ENSG00000165304 | MELK       | 1,79E-03 | 2,71E-02 | 1,07  | 2,10 |
| ENSG00000186479 | RGS7BP     | 1,81E-03 | 2,73E-02 | -0,52 | 0,70 |
| ENSG00000167625 | ZNF526     | 1,82E-03 | 2,74E-02 | -0,25 | 0,84 |
| ENSG00000108349 | CASC3      | 1,82E-03 | 2,74E-02 | -0,19 | 0,88 |
| ENSG00000162694 | EXTL2      | 1,82E-03 | 2,74E-02 | 0,33  | 1,25 |
| ENSG00000178971 | CTC1       | 1,83E-03 | 2,74E-02 | -0,25 | 0,84 |
| ENSG00000106351 | AGFG2      | 1,83E-03 | 2,74E-02 | -0,26 | 0,84 |
| ENSG00000143320 | CRABP2     | 1,83E-03 | 2,74E-02 | 0,72  | 1,65 |
| ENSG00000273542 | HIST1H4K   | 1,83E-03 | 2,75E-02 | 0,63  | 1,55 |
| ENSG00000167552 | TUBA1A     | 1,85E-03 | 2,76E-02 | 0,23  | 1,17 |
| ENSG00000189319 | FAM53B     | 1,85E-03 | 2,76E-02 | -0,22 | 0,86 |
| ENSG00000228929 | RPS13P2    | 1,85E-03 | 2,76E-02 | 0,24  | 1,18 |
| ENSG00000103932 | RPAP1      | 1,85E-03 | 2,76E-02 | -0,27 | 0,83 |
| ENSG00000247315 | ZCCHC3     | 1,86E-03 | 2,77E-02 | -0,28 | 0,82 |
| ENSG00000156931 | VPS8       | 1,87E-03 | 2,78E-02 | 0,23  | 1,17 |
| ENSG00000079308 | TNS1       | 1,88E-03 | 2,79E-02 | -0,79 | 0,58 |
| ENSG00000275385 | CCL18      | 1,88E-03 | 2,79E-02 | 1,76  | 3,38 |
| ENSG00000213493 | ACTN4P1    | 1,88E-03 | 2,80E-02 | -0,75 | 0,60 |
| ENSG00000166839 | ANKDD1A    | 1,89E-03 | 2,80E-02 | -0,46 | 0,73 |
| ENSG00000100403 | ZC3H7B     | 1,89E-03 | 2,80E-02 | -0,21 | 0,86 |
| ENSG00000109756 | RAPGEF2    | 1,90E-03 | 2,82E-02 | -0,26 | 0,84 |



|                 |            |          |          |       |      |
|-----------------|------------|----------|----------|-------|------|
| ENSG00000256616 | AP002414.2 | 1,90E-03 | 2,82E-02 | -0,46 | 0,73 |
| ENSG00000113368 | LMNB1      | 1,91E-03 | 2,83E-02 | 0,48  | 1,39 |
| ENSG00000198729 | PPP1R14C   | 1,92E-03 | 2,83E-02 | 1,12  | 2,17 |
| ENSG00000005059 | MCUB       | 1,92E-03 | 2,83E-02 | 0,34  | 1,26 |
| ENSG00000138448 | ITGAV      | 1,93E-03 | 2,85E-02 | 0,35  | 1,27 |
| ENSG00000116133 | DHCR24     | 1,94E-03 | 2,87E-02 | 0,33  | 1,26 |
| ENSG00000271503 | CCL5       | 1,94E-03 | 2,87E-02 | 0,41  | 1,32 |
| ENSG00000198355 | PIM3       | 1,96E-03 | 2,89E-02 | -0,29 | 0,82 |
| ENSG00000112394 | SLC16A10   | 1,96E-03 | 2,89E-02 | 1,01  | 2,02 |
| ENSG00000143183 | TMCO1      | 1,97E-03 | 2,89E-02 | 0,18  | 1,14 |
| ENSG00000170439 | METTL7B    | 1,97E-03 | 2,89E-02 | 0,80  | 1,75 |
| ENSG00000105538 | RASIP1     | 1,97E-03 | 2,89E-02 | -0,37 | 0,77 |
| ENSG00000136052 | SLC41A2    | 1,97E-03 | 2,89E-02 | 0,36  | 1,28 |
| ENSG00000173599 | PC         | 1,97E-03 | 2,89E-02 | -0,28 | 0,82 |
| ENSG00000174444 | RPL4       | 1,97E-03 | 2,89E-02 | 0,15  | 1,11 |
| ENSG00000166986 | MARS       | 1,98E-03 | 2,89E-02 | 0,23  | 1,18 |
| ENSG00000134851 | TMEM165    | 1,98E-03 | 2,89E-02 | 0,24  | 1,18 |
| ENSG00000127954 | STEAP4     | 1,98E-03 | 2,89E-02 | 0,34  | 1,27 |
| ENSG00000138028 | CGREF1     | 1,99E-03 | 2,90E-02 | 0,58  | 1,49 |
| ENSG00000224831 | TMEM183B   | 2,00E-03 | 2,91E-02 | 0,33  | 1,26 |
| ENSG00000242732 | RTL5       | 2,00E-03 | 2,91E-02 | -0,34 | 0,79 |
| ENSG00000277449 | CEBPB-AS1  | 2,00E-03 | 2,91E-02 | -0,47 | 0,72 |
| ENSG00000175155 | YPEL2      | 2,00E-03 | 2,91E-02 | -0,21 | 0,86 |
| ENSG00000117448 | AKR1A1     | 2,01E-03 | 2,91E-02 | 0,21  | 1,15 |
| ENSG00000177125 | ZBTB34     | 2,01E-03 | 2,91E-02 | -0,18 | 0,88 |
| ENSG00000198752 | CDC42BPB   | 2,01E-03 | 2,91E-02 | -0,19 | 0,88 |
| ENSG00000163864 | NMNAT3     | 2,01E-03 | 2,91E-02 | -0,55 | 0,68 |
| ENSG00000259826 | AC072061.1 | 2,02E-03 | 2,93E-02 | -0,68 | 0,63 |
| ENSG00000139567 | ACVRL1     | 2,03E-03 | 2,93E-02 | -0,26 | 0,83 |
| ENSG00000132478 | UNK        | 2,03E-03 | 2,93E-02 | -0,18 | 0,88 |
| ENSG00000198551 | ZNF627     | 2,03E-03 | 2,94E-02 | 0,22  | 1,16 |
| ENSG00000133243 | BTBD2      | 2,04E-03 | 2,94E-02 | -0,21 | 0,87 |
| ENSG00000113448 | PDE4D      | 2,04E-03 | 2,94E-02 | 0,29  | 1,23 |
| ENSG00000177189 | RPS6KA3    | 2,05E-03 | 2,95E-02 | 0,19  | 1,14 |
| ENSG00000196542 | SPTSSB     | 2,05E-03 | 2,96E-02 | -1,56 | 0,34 |
| ENSG00000161011 | SQSTM1     | 2,06E-03 | 2,96E-02 | -0,21 | 0,87 |
| ENSG00000147419 | CCDC25     | 2,06E-03 | 2,96E-02 | 0,18  | 1,13 |
| ENSG00000162545 | CAMK2N1    | 2,07E-03 | 2,97E-02 | -0,48 | 0,72 |
| ENSG00000184661 | CDCA2      | 2,07E-03 | 2,97E-02 | 0,93  | 1,91 |
| ENSG00000126106 | TMEM53     | 2,07E-03 | 2,97E-02 | -0,35 | 0,79 |
| ENSG00000101347 | SAMHD1     | 2,08E-03 | 2,97E-02 | 0,28  | 1,21 |
| ENSG00000017483 | SLC38A5    | 2,08E-03 | 2,97E-02 | 0,82  | 1,76 |
| ENSG00000137727 | ARHGAP20   | 2,08E-03 | 2,97E-02 | -0,61 | 0,65 |
| ENSG00000044446 | PHKA2      | 2,08E-03 | 2,97E-02 | -0,20 | 0,87 |
| ENSG00000148248 | SURF4      | 2,08E-03 | 2,97E-02 | 0,26  | 1,19 |
| ENSG00000134815 | DHX34      | 2,09E-03 | 2,98E-02 | -0,21 | 0,86 |
| ENSG00000196782 | MAML3      | 2,09E-03 | 2,98E-02 | -0,31 | 0,81 |

|                 |            |          |          |       |      |
|-----------------|------------|----------|----------|-------|------|
| ENSG00000259347 | AC087482.1 | 2,09E-03 | 2,98E-02 | -0,86 | 0,55 |
| ENSG00000064999 | ANKS1A     | 2,10E-03 | 2,99E-02 | -0,34 | 0,79 |
| ENSG00000155097 | ATP6V1C1   | 2,10E-03 | 2,99E-02 | 0,24  | 1,18 |
| ENSG00000100297 | MCM5       | 2,11E-03 | 2,99E-02 | -0,19 | 0,88 |
| ENSG00000158480 | SPATA2     | 2,11E-03 | 2,99E-02 | -0,30 | 0,81 |
| ENSG00000088179 | PTPN4      | 2,12E-03 | 2,99E-02 | 0,22  | 1,16 |
| ENSG00000104320 | NBN        | 2,12E-03 | 2,99E-02 | 0,20  | 1,15 |
| ENSG00000055147 | FAM114A2   | 2,12E-03 | 2,99E-02 | 0,19  | 1,14 |
| ENSG00000267397 | AC090229.1 | 2,12E-03 | 3,00E-02 | 0,71  | 1,63 |
| ENSG00000124177 | CHD6       | 2,13E-03 | 3,00E-02 | -0,17 | 0,89 |
| ENSG00000097046 | CDC7       | 2,13E-03 | 3,00E-02 | 0,53  | 1,45 |
| ENSG00000278463 | HIST1H2AB  | 2,13E-03 | 3,00E-02 | 0,48  | 1,39 |
| ENSG00000123338 | NCKAP1L    | 2,13E-03 | 3,00E-02 | 0,27  | 1,20 |
| ENSG00000232346 | Z74021.1   | 2,14E-03 | 3,00E-02 | 0,26  | 1,20 |
| ENSG00000037280 | FLT4       | 2,15E-03 | 3,02E-02 | -0,31 | 0,81 |
| ENSG00000134955 | SLC37A2    | 2,15E-03 | 3,02E-02 | 0,54  | 1,46 |
| ENSG00000113555 | PCDH12     | 2,16E-03 | 3,02E-02 | -0,34 | 0,79 |
| ENSG00000124429 | POF1B      | 2,16E-03 | 3,02E-02 | -0,78 | 0,58 |
| ENSG00000280355 | AL132656.4 | 2,16E-03 | 3,02E-02 | -0,43 | 0,74 |
| ENSG00000138316 | ADAMTS14   | 2,16E-03 | 3,02E-02 | 0,85  | 1,80 |
| ENSG00000104312 | RIPK2      | 2,17E-03 | 3,03E-02 | 0,24  | 1,18 |
| ENSG00000144476 | ACKR3      | 2,18E-03 | 3,04E-02 | -0,42 | 0,75 |
| ENSG00000166268 | MYRFL      | 2,18E-03 | 3,04E-02 | -0,95 | 0,52 |
| ENSG00000134061 | CD180      | 2,18E-03 | 3,04E-02 | 0,44  | 1,36 |
| ENSG00000179262 | RAD23A     | 2,19E-03 | 3,05E-02 | -0,21 | 0,86 |
| ENSG00000122420 | PTGFR      | 2,19E-03 | 3,05E-02 | 0,52  | 1,43 |
| ENSG00000183864 | TOB2       | 2,20E-03 | 3,05E-02 | -0,28 | 0,82 |
| ENSG00000236830 | CBR3-AS1   | 2,20E-03 | 3,05E-02 | -0,40 | 0,76 |
| ENSG00000132394 | EEFSEC     | 2,20E-03 | 3,05E-02 | -0,25 | 0,84 |
| ENSG00000125743 | SNRPD2     | 2,20E-03 | 3,05E-02 | 0,19  | 1,14 |
| ENSG00000085741 | WNT11      | 2,20E-03 | 3,06E-02 | -0,68 | 0,62 |
| ENSG00000179348 | GATA2      | 2,21E-03 | 3,06E-02 | -0,43 | 0,74 |
| ENSG00000256745 | AP002784.2 | 2,21E-03 | 3,06E-02 | 0,32  | 1,25 |
| ENSG00000068912 | ERLEC1     | 2,21E-03 | 3,06E-02 | 0,26  | 1,20 |
| ENSG00000185432 | METTL7A    | 2,22E-03 | 3,07E-02 | -0,26 | 0,83 |
| ENSG00000162413 | KLHL21     | 2,22E-03 | 3,07E-02 | -0,27 | 0,83 |
| ENSG00000127946 | HIP1       | 2,22E-03 | 3,07E-02 | -0,21 | 0,86 |
| ENSG00000010671 | BTK        | 2,23E-03 | 3,07E-02 | 0,30  | 1,23 |
| ENSG00000140829 | DHX38      | 2,23E-03 | 3,07E-02 | -0,15 | 0,90 |
| ENSG00000263934 | SNORD3A    | 2,24E-03 | 3,07E-02 | 0,36  | 1,28 |
| ENSG00000178385 | PLEKHM3    | 2,24E-03 | 3,07E-02 | -0,23 | 0,85 |
| ENSG00000175352 | NRIP3      | 2,24E-03 | 3,07E-02 | 0,85  | 1,80 |
| ENSG00000053702 | NRIP2      | 2,24E-03 | 3,07E-02 | -0,42 | 0,75 |
| ENSG00000239672 | NME1       | 2,25E-03 | 3,08E-02 | 0,54  | 1,45 |
| ENSG00000166226 | CCT2       | 2,25E-03 | 3,09E-02 | 0,24  | 1,18 |
| ENSG00000219607 | PPP1R3G    | 2,25E-03 | 3,09E-02 | -0,40 | 0,76 |
| ENSG00000204628 | RACK1      | 2,26E-03 | 3,09E-02 | 0,15  | 1,11 |

|                 |            |          |          |       |      |
|-----------------|------------|----------|----------|-------|------|
| ENSG00000205221 | VIT        | 2,26E-03 | 3,09E-02 | 0,29  | 1,23 |
| ENSG00000197694 | SPTAN1     | 2,26E-03 | 3,09E-02 | -0,20 | 0,87 |
| ENSG00000130653 | PNPLA7     | 2,26E-03 | 3,09E-02 | -0,44 | 0,74 |
| ENSG00000129128 | SPCS3      | 2,27E-03 | 3,09E-02 | 0,26  | 1,20 |
| ENSG00000141564 | RPTOR      | 2,27E-03 | 3,09E-02 | -0,23 | 0,85 |
| ENSG00000236792 | AL513175.2 | 2,27E-03 | 3,09E-02 | 0,64  | 1,56 |
| ENSG00000182326 | C1S        | 2,28E-03 | 3,10E-02 | 0,37  | 1,29 |
| ENSG00000165861 | ZFYVE1     | 2,28E-03 | 3,10E-02 | -0,21 | 0,87 |
| ENSG00000100336 | APOL4      | 2,28E-03 | 3,10E-02 | 0,35  | 1,27 |
| ENSG00000173894 | CBX2       | 2,29E-03 | 3,10E-02 | -0,42 | 0,75 |
| ENSG00000234882 | EIF3EP1    | 2,29E-03 | 3,10E-02 | 0,31  | 1,24 |
| ENSG00000197006 | METTL9     | 2,29E-03 | 3,10E-02 | 0,16  | 1,12 |
| ENSG00000198853 | RUSC2      | 2,29E-03 | 3,10E-02 | -0,23 | 0,85 |
| ENSG00000217027 | TPT1P4     | 2,29E-03 | 3,10E-02 | 0,23  | 1,17 |
| ENSG00000134697 | GNL2       | 2,29E-03 | 3,10E-02 | 0,22  | 1,16 |
| ENSG00000112742 | TTK        | 2,30E-03 | 3,10E-02 | 0,69  | 1,61 |
| ENSG00000078081 | LAMP3      | 2,31E-03 | 3,11E-02 | 1,01  | 2,01 |
| ENSG00000108557 | RAI1       | 2,31E-03 | 3,11E-02 | -0,37 | 0,77 |
| ENSG00000156127 | BATF       | 2,31E-03 | 3,11E-02 | 0,72  | 1,65 |
| ENSG00000176438 | SYNE3      | 2,31E-03 | 3,11E-02 | -0,28 | 0,82 |
| ENSG00000164040 | PGRMC2     | 2,32E-03 | 3,12E-02 | -0,28 | 0,82 |
| ENSG00000169991 | IFFO2      | 2,32E-03 | 3,12E-02 | -0,29 | 0,82 |
| ENSG00000079482 | OPHN1      | 2,32E-03 | 3,12E-02 | -0,26 | 0,84 |
| ENSG00000168427 | KLHL30     | 2,32E-03 | 3,12E-02 | -0,70 | 0,62 |
| ENSG00000101004 | NINL       | 2,33E-03 | 3,12E-02 | -0,23 | 0,86 |
| ENSG00000168282 | MGAT2      | 2,33E-03 | 3,12E-02 | 0,22  | 1,17 |
| ENSG00000183160 | TMEM119    | 2,33E-03 | 3,12E-02 | 0,77  | 1,71 |
| ENSG00000112078 | KCTD20     | 2,33E-03 | 3,12E-02 | 0,17  | 1,13 |
| ENSG00000150281 | CTF1       | 2,33E-03 | 3,12E-02 | -0,61 | 0,66 |
| ENSG00000138430 | OLA1       | 2,34E-03 | 3,12E-02 | 0,21  | 1,16 |
| ENSG00000129473 | BCL2L2     | 2,34E-03 | 3,12E-02 | -0,25 | 0,84 |
| ENSG00000196781 | TLE1       | 2,34E-03 | 3,12E-02 | -0,40 | 0,76 |
| ENSG00000006047 | YBX2       | 2,34E-03 | 3,12E-02 | -0,68 | 0,62 |
| ENSG00000165152 | TMEM246    | 2,35E-03 | 3,12E-02 | -0,35 | 0,78 |
| ENSG00000259488 | AC023355.1 | 2,35E-03 | 3,12E-02 | -0,55 | 0,68 |
| ENSG00000108846 | ABCC3      | 2,35E-03 | 3,12E-02 | -0,26 | 0,83 |
| ENSG00000162745 | OLFML2B    | 2,35E-03 | 3,12E-02 | 0,69  | 1,61 |
| ENSG00000138768 | USO1       | 2,36E-03 | 3,13E-02 | 0,22  | 1,16 |
| ENSG00000151062 | CACNA2D4   | 2,36E-03 | 3,13E-02 | 0,43  | 1,34 |
| ENSG00000196376 | SLC35F1    | 2,37E-03 | 3,14E-02 | -0,80 | 0,57 |
| ENSG00000109846 | CRYAB      | 2,38E-03 | 3,15E-02 | -0,60 | 0,66 |
| ENSG00000167460 | TPM4       | 2,38E-03 | 3,15E-02 | 0,31  | 1,24 |
| ENSG00000134986 | NREP       | 2,40E-03 | 3,17E-02 | 0,37  | 1,29 |
| ENSG00000080986 | NDC80      | 2,40E-03 | 3,17E-02 | 0,84  | 1,79 |
| ENSG00000169021 | UQCRFS1    | 2,40E-03 | 3,17E-02 | 0,18  | 1,13 |
| ENSG00000106123 | EPHB6      | 2,40E-03 | 3,17E-02 | -0,32 | 0,80 |
| ENSG00000129244 | ATP1B2     | 2,40E-03 | 3,17E-02 | -0,60 | 0,66 |

|                 |              |          |          |       |      |
|-----------------|--------------|----------|----------|-------|------|
| ENSG00000125798 | FOXA2        | 2,41E-03 | 3,17E-02 | -1,30 | 0,41 |
| ENSG00000185015 | CA13         | 2,41E-03 | 3,17E-02 | 0,40  | 1,32 |
| ENSG00000072310 | SREBF1       | 2,41E-03 | 3,17E-02 | -0,35 | 0,79 |
| ENSG00000128340 | RAC2         | 2,41E-03 | 3,17E-02 | 0,44  | 1,35 |
| ENSG00000167182 | SP2          | 2,41E-03 | 3,17E-02 | -0,38 | 0,77 |
| ENSG00000197256 | KANK2        | 2,42E-03 | 3,17E-02 | -0,20 | 0,87 |
| ENSG00000004776 | HSPB6        | 2,42E-03 | 3,17E-02 | -0,78 | 0,58 |
| ENSG00000185650 | ZFP36L1      | 2,43E-03 | 3,19E-02 | -0,29 | 0,82 |
| ENSG00000119760 | SUPT7L       | 2,44E-03 | 3,19E-02 | 0,15  | 1,11 |
| ENSG00000141905 | NFIC         | 2,45E-03 | 3,20E-02 | -0,39 | 0,76 |
| ENSG00000147676 | MAL2         | 2,45E-03 | 3,20E-02 | -0,99 | 0,50 |
| ENSG00000154736 | ADAMTS5      | 2,45E-03 | 3,20E-02 | -0,42 | 0,75 |
| ENSG00000135540 | NHSL1        | 2,45E-03 | 3,20E-02 | -0,29 | 0,82 |
| ENSG00000139651 | ZNF740       | 2,46E-03 | 3,20E-02 | -0,18 | 0,88 |
| ENSG00000227615 | AP001324.1   | 2,46E-03 | 3,20E-02 | 0,24  | 1,18 |
| ENSG00000100031 | GGT1         | 2,47E-03 | 3,21E-02 | 0,66  | 1,58 |
| ENSG00000165821 | SALL2        | 2,47E-03 | 3,21E-02 | -0,36 | 0,78 |
| ENSG00000174173 | TRMT10C      | 2,47E-03 | 3,22E-02 | 0,25  | 1,19 |
| ENSG00000092931 | MFSD11       | 2,48E-03 | 3,22E-02 | 0,21  | 1,16 |
| ENSG00000171017 | LRRC8E       | 2,49E-03 | 3,22E-02 | 0,87  | 1,83 |
| ENSG00000129595 | EPB41L4A     | 2,49E-03 | 3,22E-02 | -0,30 | 0,81 |
| ENSG00000148229 | POLE3        | 2,49E-03 | 3,22E-02 | 0,21  | 1,16 |
| ENSG00000100330 | MTMR3        | 2,49E-03 | 3,23E-02 | -0,17 | 0,89 |
| ENSG00000134198 | TSPAN2       | 2,49E-03 | 3,23E-02 | 0,87  | 1,82 |
| ENSG00000187688 | TRPV2        | 2,51E-03 | 3,23E-02 | 0,32  | 1,25 |
| ENSG00000110092 | CCND1        | 2,51E-03 | 3,23E-02 | -0,25 | 0,84 |
| ENSG00000213585 | VDAC1        | 2,51E-03 | 3,23E-02 | 0,24  | 1,18 |
| ENSG00000158715 | SLC45A3      | 2,51E-03 | 3,23E-02 | 0,50  | 1,41 |
| ENSG00000172817 | CYP7B1       | 2,51E-03 | 3,23E-02 | 0,32  | 1,25 |
| ENSG00000149564 | ESAM         | 2,51E-03 | 3,24E-02 | -0,31 | 0,81 |
| ENSG00000188921 | HACD4        | 2,52E-03 | 3,24E-02 | 0,20  | 1,15 |
| ENSG00000204262 | COL5A2       | 2,52E-03 | 3,24E-02 | 0,74  | 1,67 |
| ENSG00000239521 | CASTOR3      | 2,53E-03 | 3,25E-02 | -0,31 | 0,81 |
| ENSG00000139926 | FRMD6        | 2,53E-03 | 3,25E-02 | 0,40  | 1,32 |
| ENSG00000105323 | HNRNPUL1     | 2,53E-03 | 3,25E-02 | -0,20 | 0,87 |
| ENSG00000184182 | UBE2F        | 2,54E-03 | 3,25E-02 | 0,29  | 1,23 |
| ENSG00000157570 | TSPAN18      | 2,54E-03 | 3,25E-02 | -0,28 | 0,83 |
| ENSG00000132361 | CLUH         | 2,54E-03 | 3,26E-02 | -0,29 | 0,82 |
| ENSG00000258708 | SLC25A21-AS1 | 2,55E-03 | 3,26E-02 | -0,37 | 0,77 |
| ENSG00000186716 | BCR          | 2,55E-03 | 3,26E-02 | -0,28 | 0,83 |
| ENSG00000109586 | GALNT7       | 2,55E-03 | 3,26E-02 | 0,33  | 1,26 |
| ENSG00000197496 | SLC2A10      | 2,55E-03 | 3,26E-02 | 0,34  | 1,26 |
| ENSG00000164818 | DNAAF5       | 2,56E-03 | 3,26E-02 | -0,23 | 0,85 |
| ENSG00000242299 | AC073861.1   | 2,56E-03 | 3,26E-02 | 0,20  | 1,15 |
| ENSG00000126461 | SCAF1        | 2,56E-03 | 3,26E-02 | -0,40 | 0,76 |
| ENSG00000263731 | AC145207.5   | 2,57E-03 | 3,26E-02 | -0,42 | 0,75 |
| ENSG00000105792 | CFAP69       | 2,57E-03 | 3,26E-02 | 0,41  | 1,33 |

|                 |            |          |          |       |      |
|-----------------|------------|----------|----------|-------|------|
| ENSG00000257337 | AC068888.1 | 2,57E-03 | 3,26E-02 | -0,38 | 0,77 |
| ENSG00000152518 | ZFP36L2    | 2,57E-03 | 3,26E-02 | -0,43 | 0,74 |
| ENSG00000157933 | SKI        | 2,58E-03 | 3,26E-02 | -0,36 | 0,78 |
| ENSG00000102158 | MAGT1      | 2,58E-03 | 3,26E-02 | 0,18  | 1,13 |
| ENSG00000176435 | CLEC14A    | 2,59E-03 | 3,28E-02 | -0,29 | 0,82 |
| ENSG00000162104 | ADCY9      | 2,59E-03 | 3,28E-02 | -0,20 | 0,87 |
| ENSG00000144891 | AGTR1      | 2,59E-03 | 3,28E-02 | -0,50 | 0,71 |
| ENSG00000131236 | CAP1       | 2,60E-03 | 3,28E-02 | 0,19  | 1,14 |
| ENSG00000205339 | IPO7       | 2,60E-03 | 3,29E-02 | 0,16  | 1,12 |
| ENSG00000113712 | CSNK1A1    | 2,60E-03 | 3,29E-02 | 0,13  | 1,10 |
| ENSG00000135063 | FAM189A2   | 2,61E-03 | 3,29E-02 | -0,36 | 0,78 |
| ENSG00000196510 | ANAPC7     | 2,61E-03 | 3,29E-02 | 0,22  | 1,16 |
| ENSG00000241627 | UBQLN4P1   | 2,61E-03 | 3,29E-02 | -0,45 | 0,73 |
| ENSG00000172081 | MOB3A      | 2,61E-03 | 3,29E-02 | -0,27 | 0,83 |
| ENSG00000081818 | PCDHB4     | 2,62E-03 | 3,29E-02 | -0,31 | 0,80 |
| ENSG00000182899 | RPL35A     | 2,62E-03 | 3,29E-02 | 0,19  | 1,14 |
| ENSG00000118898 | PPL        | 2,62E-03 | 3,29E-02 | -0,43 | 0,74 |
| ENSG00000136522 | MRPL47     | 2,63E-03 | 3,30E-02 | 0,33  | 1,26 |
| ENSG00000266714 | MYO15B     | 2,64E-03 | 3,31E-02 | -0,28 | 0,82 |
| ENSG00000175324 | LSM1       | 2,64E-03 | 3,31E-02 | 0,30  | 1,23 |
| ENSG00000280339 | AP001528.3 | 2,64E-03 | 3,31E-02 | -0,65 | 0,64 |
| ENSG00000171914 | TLN2       | 2,65E-03 | 3,31E-02 | -0,38 | 0,77 |
| ENSG00000088325 | TPX2       | 2,65E-03 | 3,31E-02 | 0,48  | 1,40 |
| ENSG00000171475 | WIPF2      | 2,65E-03 | 3,31E-02 | -0,22 | 0,86 |
| ENSG00000196924 | FLNA       | 2,66E-03 | 3,32E-02 | -0,25 | 0,84 |
| ENSG00000005379 | TSPOAP1    | 2,66E-03 | 3,32E-02 | -0,29 | 0,82 |
| ENSG00000204397 | CARD16     | 2,67E-03 | 3,33E-02 | 0,46  | 1,38 |
| ENSG00000077092 | RARB       | 2,68E-03 | 3,33E-02 | 0,30  | 1,23 |
| ENSG00000107104 | KANK1      | 2,68E-03 | 3,33E-02 | -0,34 | 0,79 |
| ENSG00000164253 | WDR41      | 2,68E-03 | 3,33E-02 | 0,21  | 1,16 |
| ENSG00000233608 | TWIST2     | 2,69E-03 | 3,34E-02 | -0,51 | 0,70 |
| ENSG00000166557 | TMED3      | 2,70E-03 | 3,35E-02 | 0,52  | 1,43 |
| ENSG00000104723 | TUSC3      | 2,70E-03 | 3,35E-02 | 0,35  | 1,27 |
| ENSG00000149328 | GLB1L2     | 2,71E-03 | 3,36E-02 | -0,53 | 0,69 |
| ENSG00000122756 | CNTFR      | 2,72E-03 | 3,36E-02 | -0,75 | 0,59 |
| ENSG00000168374 | ARF4       | 2,72E-03 | 3,37E-02 | 0,28  | 1,21 |
| ENSG00000087365 | SF3B2      | 2,72E-03 | 3,37E-02 | -0,18 | 0,88 |
| ENSG00000167863 | ATP5PD     | 2,73E-03 | 3,37E-02 | 0,16  | 1,12 |
| ENSG00000180879 | SSR4       | 2,74E-03 | 3,38E-02 | 0,31  | 1,24 |
| ENSG00000049089 | COL9A2     | 2,75E-03 | 3,39E-02 | -1,05 | 0,48 |
| ENSG00000177614 | PGBD5      | 2,75E-03 | 3,39E-02 | 0,69  | 1,61 |
| ENSG00000166482 | MFAP4      | 2,75E-03 | 3,39E-02 | -0,79 | 0,58 |
| ENSG00000071242 | RPS6KA2    | 2,76E-03 | 3,39E-02 | -0,22 | 0,86 |
| ENSG00000149532 | CPSF7      | 2,76E-03 | 3,39E-02 | -0,16 | 0,89 |
| ENSG00000140264 | SERF2      | 2,77E-03 | 3,40E-02 | 0,22  | 1,16 |
| ENSG00000211973 | IGHV1-69   | 2,77E-03 | 3,40E-02 | 0,92  | 1,89 |
| ENSG00000196531 | NACA       | 2,77E-03 | 3,40E-02 | 0,16  | 1,11 |

|                 |          |          |          |       |      |
|-----------------|----------|----------|----------|-------|------|
| ENSG00000275342 | PRAG1    | 2,77E-03 | 3,40E-02 | -0,37 | 0,77 |
| ENSG00000070087 | PFN2     | 2,78E-03 | 3,40E-02 | 0,42  | 1,34 |
| ENSG00000137693 | YAP1     | 2,78E-03 | 3,40E-02 | -0,30 | 0,81 |
| ENSG00000095261 | PSMD5    | 2,78E-03 | 3,40E-02 | 0,17  | 1,12 |
| ENSG00000165113 | GKAP1    | 2,79E-03 | 3,40E-02 | -0,43 | 0,74 |
| ENSG00000007516 | BAIAP3   | 2,79E-03 | 3,40E-02 | -0,58 | 0,67 |
| ENSG00000156411 | ATP5MPL  | 2,79E-03 | 3,40E-02 | 0,25  | 1,19 |
| ENSG00000082175 | PGR      | 2,81E-03 | 3,43E-02 | -0,44 | 0,74 |
| ENSG00000115944 | COX7A2L  | 2,81E-03 | 3,43E-02 | 0,17  | 1,12 |
| ENSG00000114654 | EFCC1    | 2,82E-03 | 3,43E-02 | -0,48 | 0,72 |
| ENSG00000166398 | KIAA0355 | 2,82E-03 | 3,44E-02 | -0,19 | 0,88 |
| ENSG00000170088 | TMEM192  | 2,83E-03 | 3,44E-02 | -0,19 | 0,88 |
| ENSG00000100034 | PPM1F    | 2,83E-03 | 3,44E-02 | -0,19 | 0,88 |
| ENSG00000152465 | NMT2     | 2,84E-03 | 3,45E-02 | -0,29 | 0,82 |
| ENSG00000126259 | KIRREL2  | 2,85E-03 | 3,46E-02 | 1,10  | 2,15 |
| ENSG00000172046 | USP19    | 2,86E-03 | 3,47E-02 | -0,19 | 0,88 |
| ENSG00000164163 | ABCE1    | 2,86E-03 | 3,47E-02 | 0,23  | 1,17 |
| ENSG00000178175 | ZNF366   | 2,87E-03 | 3,48E-02 | -0,28 | 0,82 |
| ENSG00000100196 | KDEL3    | 2,88E-03 | 3,48E-02 | 0,63  | 1,55 |
| ENSG00000169442 | CD52     | 2,88E-03 | 3,49E-02 | 0,59  | 1,50 |
| ENSG00000159210 | SNF8     | 2,89E-03 | 3,49E-02 | 0,19  | 1,14 |
| ENSG00000183648 | NDUFB1   | 2,89E-03 | 3,49E-02 | 0,26  | 1,19 |
| ENSG00000124786 | SLC35B3  | 2,89E-03 | 3,49E-02 | 0,34  | 1,27 |
| ENSG00000095574 | IKZF5    | 2,91E-03 | 3,50E-02 | -0,28 | 0,83 |
| ENSG00000164038 | SLC9B2   | 2,91E-03 | 3,50E-02 | 0,80  | 1,74 |
| ENSG00000150551 | LYPD1    | 2,91E-03 | 3,50E-02 | 0,93  | 1,91 |
| ENSG00000172331 | BPGM     | 2,92E-03 | 3,51E-02 | 0,36  | 1,29 |
| ENSG00000168309 | FAM107A  | 2,92E-03 | 3,51E-02 | -0,54 | 0,69 |
| ENSG00000138944 | SHISAL1  | 2,92E-03 | 3,51E-02 | 0,64  | 1,56 |
| ENSG00000068323 | TFE3     | 2,93E-03 | 3,51E-02 | -0,26 | 0,84 |
| ENSG00000118263 | KLF7     | 2,93E-03 | 3,51E-02 | -0,21 | 0,86 |
| ENSG00000214941 | ZSWIM7   | 2,93E-03 | 3,51E-02 | 0,25  | 1,19 |
| ENSG00000143549 | TPM3     | 2,93E-03 | 3,51E-02 | 0,18  | 1,13 |
| ENSG00000090266 | NDUFB2   | 2,93E-03 | 3,51E-02 | 0,24  | 1,18 |
| ENSG00000152495 | CAMK4    | 2,94E-03 | 3,51E-02 | 0,74  | 1,67 |
| ENSG00000119326 | CTNNAL1  | 2,95E-03 | 3,53E-02 | 0,25  | 1,19 |
| ENSG00000158195 | WASF2    | 2,96E-03 | 3,53E-02 | -0,29 | 0,82 |
| ENSG00000114450 | GNB4     | 2,96E-03 | 3,53E-02 | 0,28  | 1,21 |
| ENSG00000118961 | LDAH     | 2,96E-03 | 3,53E-02 | 0,26  | 1,20 |
| ENSG00000145050 | MANF     | 2,96E-03 | 3,53E-02 | 0,43  | 1,35 |
| ENSG00000162552 | WNT4     | 2,96E-03 | 3,53E-02 | 0,51  | 1,42 |
| ENSG00000172115 | CYCS     | 2,97E-03 | 3,53E-02 | 0,31  | 1,24 |
| ENSG00000166033 | HTRA1    | 2,97E-03 | 3,53E-02 | 0,83  | 1,78 |
| ENSG00000167553 | TUBA1C   | 2,98E-03 | 3,54E-02 | 0,30  | 1,23 |
| ENSG00000115828 | QPCT     | 2,98E-03 | 3,54E-02 | 0,39  | 1,31 |
| ENSG00000182175 | RGMA     | 2,98E-03 | 3,54E-02 | -0,63 | 0,65 |
| ENSG00000124571 | XPO5     | 2,99E-03 | 3,54E-02 | 0,20  | 1,15 |

|                 |            |          |          |       |      |
|-----------------|------------|----------|----------|-------|------|
| ENSG00000132326 | PER2       | 2,99E-03 | 3,55E-02 | -0,33 | 0,79 |
| ENSG00000164039 | BDH2       | 3,00E-03 | 3,55E-02 | 0,22  | 1,17 |
| ENSG00000122884 | P4HA1      | 3,01E-03 | 3,56E-02 | 0,48  | 1,40 |
| ENSG00000108306 | FBXL20     | 3,01E-03 | 3,56E-02 | -0,17 | 0,89 |
| ENSG00000118058 | KMT2A      | 3,02E-03 | 3,57E-02 | -0,25 | 0,84 |
| ENSG00000250138 | AC139495.3 | 3,03E-03 | 3,58E-02 | -0,53 | 0,69 |
| ENSG00000169413 | RNASE6     | 3,03E-03 | 3,58E-02 | 0,35  | 1,27 |
| ENSG00000136770 | DNAJC1     | 3,05E-03 | 3,59E-02 | 0,23  | 1,17 |
| ENSG00000117298 | ECE1       | 3,06E-03 | 3,61E-02 | -0,28 | 0,83 |
| ENSG00000172059 | KLF11      | 3,06E-03 | 3,61E-02 | -0,33 | 0,80 |
| ENSG00000156232 | WHAMM      | 3,08E-03 | 3,62E-02 | -0,24 | 0,85 |
| ENSG00000136514 | RTP4       | 3,08E-03 | 3,62E-02 | 0,34  | 1,27 |
| ENSG00000266964 | FXYD1      | 3,08E-03 | 3,62E-02 | -0,64 | 0,64 |
| ENSG00000072062 | PRKACA     | 3,08E-03 | 3,62E-02 | -0,25 | 0,84 |
| ENSG00000076706 | AP002956.1 | 3,08E-03 | 3,62E-02 | -0,50 | 0,71 |
| ENSG00000085872 | CHERP      | 3,09E-03 | 3,62E-02 | -0,33 | 0,80 |
| ENSG00000248527 | MTATP6P1   | 3,09E-03 | 3,62E-02 | -0,40 | 0,76 |
| ENSG00000146122 | DAAM2      | 3,09E-03 | 3,62E-02 | -0,29 | 0,82 |
| ENSG00000107186 | MPDZ       | 3,10E-03 | 3,63E-02 | -0,21 | 0,87 |
| ENSG00000198406 | BZW1P2     | 3,11E-03 | 3,63E-02 | 0,35  | 1,28 |
| ENSG00000108561 | C1QBP      | 3,11E-03 | 3,64E-02 | 0,19  | 1,14 |
| ENSG00000184432 | COPB2      | 3,12E-03 | 3,64E-02 | 0,25  | 1,19 |
| ENSG00000164483 | SAMD3      | 3,13E-03 | 3,65E-02 | 0,60  | 1,51 |
| ENSG00000213523 | SRA1       | 3,13E-03 | 3,65E-02 | 0,23  | 1,17 |
| ENSG00000168032 | ENTPD3     | 3,14E-03 | 3,65E-02 | 0,64  | 1,56 |
| ENSG00000254332 | AF201337.1 | 3,14E-03 | 3,66E-02 | 0,43  | 1,35 |
| ENSG00000168447 | SCNN1B     | 3,15E-03 | 3,66E-02 | -1,01 | 0,50 |
| ENSG00000100479 | POLE2      | 3,15E-03 | 3,66E-02 | 0,49  | 1,40 |
| ENSG00000198742 | SMURF1     | 3,16E-03 | 3,68E-02 | -0,18 | 0,88 |
| ENSG00000134900 | TPP2       | 3,16E-03 | 3,68E-02 | 0,18  | 1,13 |
| ENSG00000108799 | EZH1       | 3,17E-03 | 3,68E-02 | -0,30 | 0,81 |
| ENSG00000144199 | FAHD2B     | 3,18E-03 | 3,68E-02 | -0,31 | 0,81 |
| ENSG00000028528 | SNX1       | 3,18E-03 | 3,68E-02 | -0,26 | 0,83 |
| ENSG00000111961 | SASH1      | 3,19E-03 | 3,69E-02 | -0,18 | 0,88 |
| ENSG00000136541 | ERMN       | 3,19E-03 | 3,70E-02 | 0,91  | 1,88 |
| ENSG00000173457 | PPP1R14B   | 3,20E-03 | 3,70E-02 | 0,35  | 1,28 |
| ENSG00000100934 | SEC23A     | 3,20E-03 | 3,70E-02 | 0,22  | 1,16 |
| ENSG00000126107 | HECTD3     | 3,20E-03 | 3,70E-02 | -0,23 | 0,86 |
| ENSG00000270547 | LINC01235  | 3,21E-03 | 3,70E-02 | -1,25 | 0,42 |
| ENSG00000156253 | RWDD2B     | 3,21E-03 | 3,70E-02 | 0,30  | 1,24 |
| ENSG00000169231 | THBS3      | 3,21E-03 | 3,70E-02 | 0,55  | 1,47 |
| ENSG00000157510 | AFAP1L1    | 3,22E-03 | 3,71E-02 | -0,32 | 0,80 |
| ENSG00000108932 | SLC16A6    | 3,23E-03 | 3,72E-02 | 0,75  | 1,68 |
| ENSG00000148218 | ALAD       | 3,24E-03 | 3,72E-02 | -0,17 | 0,89 |
| ENSG00000128591 | FLNC       | 3,24E-03 | 3,72E-02 | -0,49 | 0,71 |
| ENSG00000132613 | MTSS1L     | 3,24E-03 | 3,72E-02 | -0,23 | 0,85 |
| ENSG00000183715 | OPCML      | 3,24E-03 | 3,72E-02 | 0,81  | 1,75 |

|                 |            |          |          |       |      |
|-----------------|------------|----------|----------|-------|------|
| ENSG00000100014 | SPECC1L    | 3,24E-03 | 3,72E-02 | -0,16 | 0,90 |
| ENSG00000236801 | RPL24P8    | 3,26E-03 | 3,73E-02 | 0,23  | 1,17 |
| ENSG00000140451 | PIF1       | 3,26E-03 | 3,73E-02 | 0,84  | 1,79 |
| ENSG00000171466 | ZNF562     | 3,29E-03 | 3,77E-02 | 0,16  | 1,12 |
| ENSG00000100105 | PATZ1      | 3,30E-03 | 3,77E-02 | -0,22 | 0,86 |
| ENSG00000160094 | ZNF362     | 3,30E-03 | 3,77E-02 | -0,26 | 0,83 |
| ENSG00000171314 | PGAM1      | 3,30E-03 | 3,77E-02 | 0,42  | 1,34 |
| ENSG00000178741 | COX5A      | 3,31E-03 | 3,78E-02 | 0,27  | 1,20 |
| ENSG00000082438 | COBLL1     | 3,31E-03 | 3,78E-02 | -0,42 | 0,75 |
| ENSG00000100027 | YPEL1      | 3,32E-03 | 3,78E-02 | -0,35 | 0,78 |
| ENSG00000106028 | SSBP1      | 3,32E-03 | 3,78E-02 | 0,20  | 1,15 |
| ENSG00000153048 | CARHSP1    | 3,32E-03 | 3,78E-02 | -0,22 | 0,86 |
| ENSG00000116815 | CD58       | 3,33E-03 | 3,78E-02 | 0,40  | 1,32 |
| ENSG00000140577 | CRTC3      | 3,33E-03 | 3,78E-02 | -0,23 | 0,85 |
| ENSG00000264522 | OTUD7B     | 3,33E-03 | 3,78E-02 | -0,27 | 0,83 |
| ENSG00000185130 | HIST1H2BL  | 3,33E-03 | 3,78E-02 | 0,48  | 1,40 |
| ENSG00000145016 | RUBCN      | 3,35E-03 | 3,80E-02 | -0,19 | 0,88 |
| ENSG00000100399 | CHADL      | 3,35E-03 | 3,80E-02 | -0,69 | 0,62 |
| ENSG00000181744 | DIPK2A     | 3,36E-03 | 3,80E-02 | 0,24  | 1,18 |
| ENSG00000116198 | CEP104     | 3,36E-03 | 3,80E-02 | -0,19 | 0,88 |
| ENSG00000204392 | LSM2       | 3,37E-03 | 3,80E-02 | 0,26  | 1,20 |
| ENSG00000130856 | ZNF236     | 3,37E-03 | 3,80E-02 | -0,18 | 0,88 |
| ENSG00000137040 | RANBP6     | 3,37E-03 | 3,80E-02 | 0,20  | 1,15 |
| ENSG00000200959 | SNORA74A   | 3,37E-03 | 3,80E-02 | 0,54  | 1,45 |
| ENSG00000151320 | AKAP6      | 3,37E-03 | 3,80E-02 | 0,57  | 1,48 |
| ENSG00000188342 | GTF2F2     | 3,37E-03 | 3,80E-02 | 0,20  | 1,15 |
| ENSG00000205302 | SNX2       | 3,37E-03 | 3,80E-02 | 0,16  | 1,12 |
| ENSG00000156711 | MAPK13     | 3,37E-03 | 3,80E-02 | 0,58  | 1,50 |
| ENSG00000120253 | NUP43      | 3,37E-03 | 3,80E-02 | 0,14  | 1,10 |
| ENSG00000142327 | RNPEPL1    | 3,39E-03 | 3,81E-02 | -0,29 | 0,82 |
| ENSG00000198168 | SVIP       | 3,39E-03 | 3,81E-02 | -0,24 | 0,85 |
| ENSG00000100982 | PCIF1      | 3,40E-03 | 3,81E-02 | -0,30 | 0,81 |
| ENSG00000160408 | ST6GALNAC6 | 3,40E-03 | 3,81E-02 | -0,21 | 0,86 |
| ENSG00000143324 | XPR1       | 3,40E-03 | 3,81E-02 | 0,30  | 1,23 |
| ENSG00000234287 | AC099560.2 | 3,40E-03 | 3,81E-02 | 0,20  | 1,15 |
| ENSG00000145495 | MARCH6     | 3,40E-03 | 3,81E-02 | -0,21 | 0,87 |
| ENSG00000133706 | LARS       | 3,40E-03 | 3,81E-02 | 0,15  | 1,11 |
| ENSG00000139496 | NUP58      | 3,41E-03 | 3,81E-02 | 0,17  | 1,12 |
| ENSG00000132581 | SDF2       | 3,41E-03 | 3,81E-02 | 0,19  | 1,14 |
| ENSG00000007237 | GAS7       | 3,41E-03 | 3,81E-02 | 0,23  | 1,17 |
| ENSG00000165895 | ARHGAP42   | 3,42E-03 | 3,81E-02 | -0,30 | 0,81 |
| ENSG00000104299 | INTS9      | 3,42E-03 | 3,82E-02 | 0,19  | 1,14 |
| ENSG00000054803 | CBLN4      | 3,43E-03 | 3,82E-02 | -0,47 | 0,72 |
| ENSG00000177363 | LRRN4CL    | 3,43E-03 | 3,82E-02 | -0,83 | 0,56 |
| ENSG00000065526 | SPEN       | 3,44E-03 | 3,83E-02 | -0,28 | 0,82 |
| ENSG00000089159 | PXN        | 3,45E-03 | 3,84E-02 | -0,23 | 0,85 |
| ENSG00000116132 | PRRX1      | 3,45E-03 | 3,84E-02 | 0,45  | 1,36 |



|                 |            |          |          |       |      |
|-----------------|------------|----------|----------|-------|------|
| ENSG00000134283 | PPhLN1     | 3,46E-03 | 3,84E-02 | 0,18  | 1,13 |
| ENSG00000179218 | CALR       | 3,46E-03 | 3,84E-02 | 0,26  | 1,20 |
| ENSG00000088387 | DOCK9      | 3,48E-03 | 3,86E-02 | -0,17 | 0,89 |
| ENSG00000184863 | RBM33      | 3,48E-03 | 3,86E-02 | -0,19 | 0,88 |
| ENSG00000216285 | AC078819.1 | 3,49E-03 | 3,87E-02 | 0,45  | 1,37 |
| ENSG00000176731 | C8orf59    | 3,49E-03 | 3,87E-02 | 0,23  | 1,17 |
| ENSG00000169933 | FRMPD4     | 3,50E-03 | 3,87E-02 | 0,91  | 1,87 |
| ENSG00000171307 | ZDHHC16    | 3,52E-03 | 3,89E-02 | 0,22  | 1,16 |
| ENSG00000145349 | CAMK2D     | 3,52E-03 | 3,89E-02 | 0,15  | 1,11 |
| ENSG00000166925 | TSC22D4    | 3,53E-03 | 3,90E-02 | -0,24 | 0,85 |
| ENSG00000148384 | INPP5E     | 3,53E-03 | 3,90E-02 | -0,26 | 0,84 |
| ENSG00000159640 | ACE        | 3,54E-03 | 3,91E-02 | -0,41 | 0,75 |
| ENSG00000138036 | DYNC2L11   | 3,55E-03 | 3,91E-02 | 0,22  | 1,16 |
| ENSG00000094880 | CDC23      | 3,56E-03 | 3,92E-02 | 0,15  | 1,11 |
| ENSG00000031081 | ARHGAP31   | 3,57E-03 | 3,93E-02 | -0,16 | 0,89 |
| ENSG00000023697 | DERA       | 3,57E-03 | 3,93E-02 | 0,26  | 1,20 |
| ENSG00000146278 | PNRC1      | 3,59E-03 | 3,95E-02 | -0,24 | 0,85 |
| ENSG00000173692 | PSMD1      | 3,60E-03 | 3,96E-02 | 0,17  | 1,13 |
| ENSG00000151725 | CENPU      | 3,61E-03 | 3,97E-02 | 0,50  | 1,42 |
| ENSG00000259916 | AL845331.2 | 3,62E-03 | 3,97E-02 | -1,16 | 0,45 |
| ENSG00000123562 | MORF4L2    | 3,62E-03 | 3,97E-02 | 0,22  | 1,17 |
| ENSG00000136542 | GALNT5     | 3,62E-03 | 3,97E-02 | 0,53  | 1,45 |
| ENSG00000005700 | IBTK       | 3,63E-03 | 3,98E-02 | 0,22  | 1,17 |
| ENSG00000139278 | GLIPR1     | 3,64E-03 | 3,98E-02 | 0,25  | 1,19 |
| ENSG00000063127 | SLC6A16    | 3,65E-03 | 3,99E-02 | -0,51 | 0,70 |
| ENSG00000101445 | PPP1R16B   | 3,65E-03 | 3,99E-02 | -0,41 | 0,75 |
| ENSG00000228623 | ZNF883     | 3,65E-03 | 3,99E-02 | 0,61  | 1,53 |
| ENSG00000130311 | DDA1       | 3,66E-03 | 3,99E-02 | -0,24 | 0,85 |
| ENSG00000159403 | C1R        | 3,68E-03 | 4,01E-02 | 0,44  | 1,36 |
| ENSG00000107140 | TESK1      | 3,68E-03 | 4,01E-02 | -0,25 | 0,84 |
| ENSG00000113643 | RARS       | 3,70E-03 | 4,04E-02 | 0,23  | 1,17 |
| ENSG00000250251 | PKD1P6     | 3,71E-03 | 4,04E-02 | -0,24 | 0,85 |
| ENSG00000159199 | ATP5MC1    | 3,71E-03 | 4,04E-02 | 0,21  | 1,16 |
| ENSG00000246430 | LINC00968  | 3,73E-03 | 4,06E-02 | -0,85 | 0,56 |
| ENSG00000175606 | TMEM70     | 3,74E-03 | 4,06E-02 | 0,35  | 1,27 |
| ENSG00000104325 | DECR1      | 3,74E-03 | 4,06E-02 | 0,20  | 1,14 |
| ENSG00000187323 | DCC        | 3,74E-03 | 4,06E-02 | -0,78 | 0,58 |
| ENSG00000169783 | LINGO1     | 3,76E-03 | 4,07E-02 | -0,41 | 0,75 |
| ENSG00000154511 | DIPK1A     | 3,76E-03 | 4,07E-02 | 0,30  | 1,24 |
| ENSG00000175348 | TMEM9B     | 3,77E-03 | 4,08E-02 | 0,18  | 1,14 |
| ENSG00000134153 | EMC7       | 3,79E-03 | 4,10E-02 | 0,23  | 1,17 |
| ENSG00000188856 | RPSAP47    | 3,80E-03 | 4,11E-02 | 0,57  | 1,48 |
| ENSG00000172071 | EIF2AK3    | 3,81E-03 | 4,12E-02 | 0,21  | 1,16 |
| ENSG00000244313 | AC024293.1 | 3,82E-03 | 4,12E-02 | 0,17  | 1,13 |
| ENSG00000184897 | H1FX       | 3,83E-03 | 4,13E-02 | -0,26 | 0,83 |
| ENSG00000135677 | GNS        | 3,83E-03 | 4,13E-02 | 0,21  | 1,16 |
| ENSG00000173917 | HOXB2      | 3,83E-03 | 4,13E-02 | 0,54  | 1,45 |

|                 |            |          |          |       |      |
|-----------------|------------|----------|----------|-------|------|
| ENSG00000103494 | RPGRIP1L   | 3,84E-03 | 4,14E-02 | 0,35  | 1,27 |
| ENSG00000254402 | LRRC24     | 3,84E-03 | 4,14E-02 | -0,43 | 0,74 |
| ENSG00000122873 | CISD1      | 3,86E-03 | 4,15E-02 | 0,32  | 1,25 |
| ENSG00000180198 | RCC1       | 3,86E-03 | 4,15E-02 | 0,37  | 1,29 |
| ENSG00000280411 | IGHV1-69D  | 3,87E-03 | 4,16E-02 | 1,12  | 2,17 |
| ENSG00000123505 | AMD1       | 3,87E-03 | 4,16E-02 | 0,17  | 1,12 |
| ENSG00000141965 | FEM1A      | 3,88E-03 | 4,17E-02 | -0,20 | 0,87 |
| ENSG00000138772 | ANXA3      | 3,89E-03 | 4,17E-02 | -0,57 | 0,67 |
| ENSG00000173548 | SNX33      | 3,89E-03 | 4,17E-02 | -0,23 | 0,85 |
| ENSG00000213189 | BTF3L4P2   | 3,90E-03 | 4,17E-02 | 0,38  | 1,30 |
| ENSG00000147224 | PRPS1      | 3,90E-03 | 4,17E-02 | 0,20  | 1,15 |
| ENSG00000251301 | LINC02384  | 3,90E-03 | 4,17E-02 | 0,75  | 1,68 |
| ENSG00000140740 | UQCRC2     | 3,90E-03 | 4,17E-02 | 0,15  | 1,11 |
| ENSG00000140396 | NCOA2      | 3,90E-03 | 4,17E-02 | -0,12 | 0,92 |
| ENSG00000127324 | TSPAN8     | 3,92E-03 | 4,18E-02 | -0,57 | 0,67 |
| ENSG00000095777 | MYO3A      | 3,92E-03 | 4,18E-02 | 1,39  | 2,62 |
| ENSG00000140650 | PMM2       | 3,92E-03 | 4,18E-02 | 0,30  | 1,23 |
| ENSG00000205336 | ADGRG1     | 3,93E-03 | 4,18E-02 | -0,43 | 0,74 |
| ENSG00000149346 | SLX4IP     | 3,93E-03 | 4,18E-02 | 0,25  | 1,19 |
| ENSG00000112293 | GPLD1      | 3,94E-03 | 4,19E-02 | -0,55 | 0,68 |
| ENSG00000034053 | APBA2      | 3,95E-03 | 4,21E-02 | 0,43  | 1,35 |
| ENSG00000137075 | RNF38      | 3,96E-03 | 4,21E-02 | -0,23 | 0,85 |
| ENSG00000094804 | CDC6       | 3,97E-03 | 4,22E-02 | 0,77  | 1,70 |
| ENSG00000156453 | PCDH1      | 3,97E-03 | 4,22E-02 | -0,30 | 0,81 |
| ENSG00000183018 | AC118754.1 | 3,98E-03 | 4,22E-02 | 0,39  | 1,31 |
| ENSG00000003402 | CFLAR      | 3,98E-03 | 4,22E-02 | -0,22 | 0,86 |
| ENSG00000134824 | FADS2      | 3,99E-03 | 4,23E-02 | 0,44  | 1,36 |
| ENSG00000088808 | PPP1R13B   | 3,99E-03 | 4,23E-02 | -0,24 | 0,85 |
| ENSG00000189057 | FAM111B    | 4,00E-03 | 4,23E-02 | 0,97  | 1,96 |
| ENSG00000182389 | CACNB4     | 4,01E-03 | 4,24E-02 | 0,71  | 1,63 |
| ENSG00000133216 | EPHB2      | 4,01E-03 | 4,24E-02 | 0,42  | 1,34 |
| ENSG00000162695 | SLC30A7    | 4,01E-03 | 4,24E-02 | 0,21  | 1,16 |
| ENSG00000211445 | GPX3       | 4,02E-03 | 4,24E-02 | -0,65 | 0,64 |
| ENSG00000157456 | CCNB2      | 4,02E-03 | 4,24E-02 | 0,95  | 1,93 |
| ENSG00000138757 | G3BP2      | 4,04E-03 | 4,25E-02 | 0,15  | 1,11 |
| ENSG00000181291 | TMEM132E   | 4,04E-03 | 4,25E-02 | 0,87  | 1,83 |
| ENSG00000068137 | PLEKHH3    | 4,05E-03 | 4,27E-02 | -0,23 | 0,85 |
| ENSG00000174306 | ZHX3       | 4,06E-03 | 4,27E-02 | -0,31 | 0,81 |
| ENSG00000162337 | LRP5       | 4,06E-03 | 4,27E-02 | -0,31 | 0,81 |
| ENSG00000137154 | RPS6       | 4,07E-03 | 4,27E-02 | 0,14  | 1,10 |
| ENSG00000163517 | HDAC11     | 4,08E-03 | 4,29E-02 | -0,28 | 0,83 |
| ENSG00000188282 | RUFY4      | 4,09E-03 | 4,29E-02 | 0,90  | 1,87 |
| ENSG00000120697 | ALG5       | 4,09E-03 | 4,29E-02 | 0,27  | 1,21 |
| ENSG00000034971 | MYOC       | 4,10E-03 | 4,30E-02 | -2,01 | 0,25 |
| ENSG00000128578 | STRIP2     | 4,12E-03 | 4,31E-02 | 0,82  | 1,76 |
| ENSG00000174151 | CYB561D1   | 4,12E-03 | 4,32E-02 | -0,21 | 0,86 |
| ENSG00000116898 | MRPS15     | 4,13E-03 | 4,32E-02 | 0,23  | 1,17 |

|                 |            |          |          |       |      |
|-----------------|------------|----------|----------|-------|------|
| ENSG00000119042 | SATB2      | 4,15E-03 | 4,34E-02 | 0,30  | 1,23 |
| ENSG00000213047 | DENND1B    | 4,15E-03 | 4,34E-02 | 0,23  | 1,17 |
| ENSG00000148516 | ZEB1       | 4,15E-03 | 4,34E-02 | 0,20  | 1,15 |
| ENSG00000120675 | DNAJC15    | 4,16E-03 | 4,34E-02 | 0,20  | 1,15 |
| ENSG00000198034 | RPS4X      | 4,16E-03 | 4,34E-02 | 0,15  | 1,11 |
| ENSG00000089248 | ERP29      | 4,18E-03 | 4,35E-02 | 0,19  | 1,14 |
| ENSG00000133619 | KRBA1      | 4,18E-03 | 4,36E-02 | -0,25 | 0,84 |
| ENSG00000085276 | MECOM      | 4,18E-03 | 4,36E-02 | -0,25 | 0,84 |
| ENSG00000279692 | AC110285.7 | 4,19E-03 | 4,36E-02 | -0,68 | 0,62 |
| ENSG00000198947 | DMD        | 4,20E-03 | 4,37E-02 | -0,58 | 0,67 |
| ENSG00000143870 | PDIA6      | 4,20E-03 | 4,37E-02 | 0,23  | 1,17 |
| ENSG00000196353 | CPNE4      | 4,21E-03 | 4,37E-02 | -0,97 | 0,51 |
| ENSG00000237350 | CDC42P6    | 4,22E-03 | 4,37E-02 | 0,19  | 1,14 |
| ENSG00000100473 | COCH       | 4,22E-03 | 4,37E-02 | 0,66  | 1,58 |
| ENSG00000102996 | MMP15      | 4,22E-03 | 4,37E-02 | -0,30 | 0,81 |
| ENSG00000256043 | CTSO       | 4,23E-03 | 4,38E-02 | 0,18  | 1,13 |
| ENSG00000109674 | NEIL3      | 4,24E-03 | 4,39E-02 | 0,97  | 1,96 |
| ENSG00000179912 | R3HDM2     | 4,24E-03 | 4,39E-02 | -0,24 | 0,85 |
| ENSG00000184445 | KNTC1      | 4,24E-03 | 4,39E-02 | 0,19  | 1,14 |
| ENSG00000166851 | PLK1       | 4,25E-03 | 4,40E-02 | 0,62  | 1,54 |
| ENSG00000100528 | CNIH1      | 4,27E-03 | 4,40E-02 | 0,23  | 1,18 |
| ENSG00000147119 | CHST7      | 4,27E-03 | 4,40E-02 | -0,42 | 0,75 |
| ENSG00000204387 | C6orf48    | 4,27E-03 | 4,40E-02 | 0,17  | 1,12 |
| ENSG00000096717 | SIRT1      | 4,28E-03 | 4,41E-02 | -0,20 | 0,87 |
| ENSG00000011422 | PLAUR      | 4,28E-03 | 4,41E-02 | 0,44  | 1,36 |
| ENSG00000166405 | RIC3       | 4,29E-03 | 4,42E-02 | -0,92 | 0,53 |
| ENSG00000105732 | ZNF574     | 4,29E-03 | 4,42E-02 | -0,29 | 0,82 |
| ENSG00000196581 | AJAP1      | 4,30E-03 | 4,42E-02 | -0,53 | 0,69 |
| ENSG00000170606 | HSPA4      | 4,30E-03 | 4,42E-02 | 0,18  | 1,13 |
| ENSG00000005102 | MEOX1      | 4,31E-03 | 4,42E-02 | -0,59 | 0,67 |
| ENSG00000091106 | NLRC4      | 4,31E-03 | 4,43E-02 | 0,42  | 1,33 |
| ENSG00000149929 | HIRIP3     | 4,31E-03 | 4,43E-02 | -0,28 | 0,83 |
| ENSG00000079432 | CIC        | 4,32E-03 | 4,43E-02 | -0,31 | 0,81 |
| ENSG00000136810 | TXN        | 4,32E-03 | 4,43E-02 | 0,28  | 1,21 |
| ENSG00000156374 | PCGF6      | 4,33E-03 | 4,43E-02 | 0,27  | 1,21 |
| ENSG00000158813 | EDA        | 4,34E-03 | 4,44E-02 | -0,33 | 0,80 |
| ENSG00000154330 | PGM5       | 4,34E-03 | 4,44E-02 | -0,46 | 0,73 |
| ENSG00000108175 | ZMIZ1      | 4,36E-03 | 4,46E-02 | -0,33 | 0,79 |
| ENSG00000171033 | PKIA       | 4,36E-03 | 4,46E-02 | 0,62  | 1,53 |
| ENSG00000016391 | CHDH       | 4,38E-03 | 4,47E-02 | -0,72 | 0,61 |
| ENSG00000141448 | GATA6      | 4,39E-03 | 4,48E-02 | -0,69 | 0,62 |
| ENSG00000064726 | BTBD1      | 4,40E-03 | 4,48E-02 | 0,19  | 1,14 |
| ENSG00000140367 | UBE2Q2     | 4,40E-03 | 4,49E-02 | 0,25  | 1,19 |
| ENSG00000149499 | EML3       | 4,41E-03 | 4,49E-02 | -0,20 | 0,87 |
| ENSG00000174547 | MRPL11     | 4,41E-03 | 4,49E-02 | 0,20  | 1,15 |
| ENSG00000179456 | ZBTB18     | 4,42E-03 | 4,49E-02 | -0,30 | 0,81 |
| ENSG00000172673 | THEMIS     | 4,42E-03 | 4,49E-02 | 0,58  | 1,50 |

|                 |            |          |          |       |      |
|-----------------|------------|----------|----------|-------|------|
| ENSG00000164919 | COX6C      | 4,43E-03 | 4,50E-02 | 0,20  | 1,15 |
| ENSG00000155966 | AFF2       | 4,44E-03 | 4,51E-02 | 0,34  | 1,26 |
| ENSG00000078399 | HOXA9      | 4,45E-03 | 4,52E-02 | -0,33 | 0,79 |
| ENSG00000069011 | PITX1      | 4,47E-03 | 4,53E-02 | -0,37 | 0,77 |
| ENSG00000178035 | IMPDH2     | 4,48E-03 | 4,53E-02 | 0,16  | 1,12 |
| ENSG00000123240 | OPTN       | 4,48E-03 | 4,53E-02 | -0,19 | 0,88 |
| ENSG00000165626 | BEND7      | 4,49E-03 | 4,55E-02 | -0,39 | 0,77 |
| ENSG00000138030 | KHK        | 4,50E-03 | 4,55E-02 | -0,47 | 0,72 |
| ENSG00000116194 | ANGPTL1    | 4,51E-03 | 4,55E-02 | 0,74  | 1,67 |
| ENSG00000156304 | SCAF4      | 4,51E-03 | 4,55E-02 | -0,26 | 0,84 |
| ENSG00000171793 | CTPS1      | 4,51E-03 | 4,55E-02 | 0,45  | 1,36 |
| ENSG00000000005 | TNMD       | 4,52E-03 | 4,56E-02 | -0,84 | 0,56 |
| ENSG00000182600 | SNORC      | 4,52E-03 | 4,56E-02 | -1,23 | 0,43 |
| ENSG00000089472 | HEPH       | 4,52E-03 | 4,56E-02 | 0,33  | 1,26 |
| ENSG00000204469 | PRRC2A     | 4,53E-03 | 4,56E-02 | -0,28 | 0,82 |
| ENSG00000174851 | YIF1A      | 4,53E-03 | 4,56E-02 | 0,21  | 1,16 |
| ENSG00000139998 | RAB15      | 4,53E-03 | 4,56E-02 | 0,60  | 1,52 |
| ENSG00000180537 | RNF182     | 4,55E-03 | 4,57E-02 | 0,73  | 1,65 |
| ENSG00000160678 | S100A1     | 4,56E-03 | 4,58E-02 | -0,88 | 0,54 |
| ENSG00000149596 | JPH2       | 4,57E-03 | 4,58E-02 | -0,49 | 0,71 |
| ENSG00000115594 | IL1R1      | 4,57E-03 | 4,58E-02 | 0,28  | 1,22 |
| ENSG00000112280 | COL9A1     | 4,58E-03 | 4,59E-02 | -1,56 | 0,34 |
| ENSG00000230006 | ANKRD36BP2 | 4,58E-03 | 4,59E-02 | 0,47  | 1,39 |
| ENSG00000181027 | FKRP       | 4,58E-03 | 4,59E-02 | -0,25 | 0,84 |
| ENSG00000178947 | SMIM10L2A  | 4,59E-03 | 4,59E-02 | -0,32 | 0,80 |
| ENSG00000079332 | SAR1A      | 4,59E-03 | 4,59E-02 | 0,14  | 1,10 |
| ENSG00000172172 | MRPL13     | 4,59E-03 | 4,59E-02 | 0,29  | 1,22 |
| ENSG00000197183 | NOL4L      | 4,59E-03 | 4,59E-02 | -0,28 | 0,82 |
| ENSG00000163904 | SEN2       | 4,61E-03 | 4,60E-02 | -0,19 | 0,87 |
| ENSG00000165416 | SUGT1      | 4,61E-03 | 4,60E-02 | -0,16 | 0,90 |
| ENSG00000198759 | EGFL6      | 4,61E-03 | 4,60E-02 | -0,94 | 0,52 |
| ENSG00000110344 | UBE4A      | 4,62E-03 | 4,60E-02 | 0,11  | 1,08 |
| ENSG00000102317 | RBM3       | 4,62E-03 | 4,61E-02 | 0,15  | 1,11 |
| ENSG00000166689 | PLEKHA7    | 4,63E-03 | 4,61E-02 | -0,28 | 0,83 |
| ENSG00000160791 | CCR5       | 4,63E-03 | 4,61E-02 | 0,50  | 1,41 |
| ENSG00000100139 | MICALL1    | 4,64E-03 | 4,61E-02 | -0,19 | 0,88 |
| ENSG00000086991 | NOX4       | 4,64E-03 | 4,61E-02 | -0,61 | 0,65 |
| ENSG00000138764 | CCNG2      | 4,65E-03 | 4,62E-02 | -0,18 | 0,88 |
| ENSG00000196547 | MAN2A2     | 4,65E-03 | 4,62E-02 | -0,26 | 0,84 |
| ENSG00000168066 | SF1        | 4,66E-03 | 4,62E-02 | -0,20 | 0,87 |
| ENSG00000099282 | TSPAN15    | 4,68E-03 | 4,64E-02 | -0,47 | 0,72 |
| ENSG00000211663 | IGLV3-19   | 4,68E-03 | 4,64E-02 | 0,68  | 1,60 |
| ENSG00000054116 | TRAPPC3    | 4,70E-03 | 4,65E-02 | 0,18  | 1,13 |
| ENSG00000024526 | DEPDC1     | 4,70E-03 | 4,66E-02 | 0,84  | 1,78 |
| ENSG00000196810 | CTBP1-DT   | 4,71E-03 | 4,66E-02 | -0,21 | 0,86 |
| ENSG00000072134 | EPN2       | 4,72E-03 | 4,66E-02 | -0,20 | 0,87 |
| ENSG00000143119 | CD53       | 4,73E-03 | 4,68E-02 | 0,36  | 1,28 |

|                 |            |          |          |       |      |
|-----------------|------------|----------|----------|-------|------|
| ENSG00000146859 | TMEM140    | 4,74E-03 | 4,68E-02 | -0,29 | 0,82 |
| ENSG00000151779 | NBAS       | 4,75E-03 | 4,69E-02 | 0,13  | 1,09 |
| ENSG00000272070 | AC005618.1 | 4,76E-03 | 4,69E-02 | -0,50 | 0,71 |
| ENSG00000276710 | CSPG4P10   | 4,76E-03 | 4,69E-02 | -0,48 | 0,72 |
| ENSG00000155189 | AGPAT5     | 4,76E-03 | 4,69E-02 | 0,22  | 1,16 |
| ENSG00000099875 | MKNK2      | 4,76E-03 | 4,69E-02 | -0,35 | 0,78 |
| ENSG00000166473 | PKD1L2     | 4,79E-03 | 4,71E-02 | -0,92 | 0,53 |
| ENSG00000159314 | ARHGAP27   | 4,79E-03 | 4,71E-02 | -0,24 | 0,85 |
| ENSG00000254910 | AC136475.2 | 4,80E-03 | 4,72E-02 | -0,68 | 0,62 |
| ENSG00000120645 | IQSEC3     | 4,81E-03 | 4,72E-02 | -0,59 | 0,67 |
| ENSG00000184575 | XPOT       | 4,81E-03 | 4,73E-02 | 0,16  | 1,12 |
| ENSG00000144791 | LIMD1      | 4,84E-03 | 4,75E-02 | -0,13 | 0,91 |
| ENSG00000178538 | CA8        | 4,85E-03 | 4,75E-02 | -0,65 | 0,64 |
| ENSG00000065060 | UHRF1BP1   | 4,85E-03 | 4,75E-02 | -0,16 | 0,90 |
| ENSG00000068615 | REEP1      | 4,85E-03 | 4,75E-02 | 0,54  | 1,46 |
| ENSG00000116731 | PRDM2      | 4,86E-03 | 4,75E-02 | -0,15 | 0,90 |
| ENSG00000105246 | EBI3       | 4,86E-03 | 4,75E-02 | -0,57 | 0,68 |
| ENSG00000179364 | PACS2      | 4,86E-03 | 4,75E-02 | -0,18 | 0,88 |
| ENSG00000179603 | GRM8       | 4,87E-03 | 4,75E-02 | -0,74 | 0,60 |
| ENSG00000120708 | TGFBI      | 4,87E-03 | 4,75E-02 | 0,55  | 1,46 |
| ENSG00000065183 | WDR3       | 4,87E-03 | 4,75E-02 | 0,16  | 1,11 |
| ENSG00000152683 | SLC30A6    | 4,88E-03 | 4,76E-02 | 0,18  | 1,13 |
| ENSG00000150275 | PCDH15     | 4,88E-03 | 4,76E-02 | 0,98  | 1,97 |
| ENSG00000032219 | ARID4A     | 4,88E-03 | 4,76E-02 | -0,17 | 0,89 |
| ENSG00000104635 | SLC39A14   | 4,90E-03 | 4,77E-02 | 0,51  | 1,42 |
| ENSG00000184271 | AC139768.1 | 4,90E-03 | 4,77E-02 | -0,24 | 0,85 |
| ENSG00000141084 | RANBP10    | 4,94E-03 | 4,81E-02 | -0,19 | 0,88 |
| ENSG00000089053 | ANAPC5     | 4,95E-03 | 4,81E-02 | 0,19  | 1,14 |
| ENSG00000123064 | DDX54      | 4,95E-03 | 4,81E-02 | -0,15 | 0,90 |
| ENSG00000124562 | SNRPC      | 4,95E-03 | 4,81E-02 | 0,22  | 1,16 |
| ENSG00000042753 | AP2S1      | 4,97E-03 | 4,82E-02 | 0,23  | 1,17 |
| ENSG00000139187 | KLRG1      | 4,97E-03 | 4,82E-02 | 0,49  | 1,40 |
| ENSG00000128908 | INO80      | 4,97E-03 | 4,82E-02 | -0,15 | 0,90 |
| ENSG00000177283 | FZD8       | 4,99E-03 | 4,83E-02 | -0,29 | 0,82 |
| ENSG00000221968 | FADS3      | 4,99E-03 | 4,83E-02 | -0,30 | 0,81 |
| ENSG00000138674 | SEC31A     | 5,00E-03 | 4,83E-02 | 0,22  | 1,17 |
| ENSG00000110987 | BCL7A      | 5,00E-03 | 4,83E-02 | -0,39 | 0,76 |
| ENSG00000101331 | CCM2L      | 5,01E-03 | 4,84E-02 | -0,33 | 0,80 |
| ENSG00000170899 | GSTA4      | 5,02E-03 | 4,85E-02 | 0,20  | 1,14 |
| ENSG00000103196 | CRISPLD2   | 5,03E-03 | 4,86E-02 | 0,47  | 1,39 |
| ENSG00000198826 | ARHGAP11A  | 5,04E-03 | 4,86E-02 | 0,49  | 1,40 |
| ENSG00000165507 | DEPP1      | 5,04E-03 | 4,86E-02 | -0,55 | 0,68 |
| ENSG00000171206 | TRIM8      | 5,05E-03 | 4,87E-02 | -0,26 | 0,83 |
| ENSG00000161649 | CD300LG    | 5,06E-03 | 4,87E-02 | -0,48 | 0,72 |
| ENSG00000167978 | SRRM2      | 5,06E-03 | 4,87E-02 | -0,29 | 0,82 |
| ENSG00000214717 | ZBED1      | 5,06E-03 | 4,87E-02 | -0,16 | 0,89 |
| ENSG00000278828 | HIST1H3H   | 5,08E-03 | 4,88E-02 | 0,31  | 1,24 |

|                 |          |          |          |       |      |
|-----------------|----------|----------|----------|-------|------|
| ENSG00000063245 | EPN1     | 5,08E-03 | 4,88E-02 | -0,20 | 0,87 |
| ENSG00000160007 | ARHGAP35 | 5,10E-03 | 4,90E-02 | -0,19 | 0,88 |
| ENSG00000136521 | NDUFB5   | 5,10E-03 | 4,90E-02 | 0,21  | 1,16 |
| ENSG00000160111 | CPAMD8   | 5,11E-03 | 4,90E-02 | -0,84 | 0,56 |
| ENSG00000184517 | ZFP1     | 5,13E-03 | 4,91E-02 | 0,19  | 1,14 |
| ENSG00000167470 | MIDN     | 5,15E-03 | 4,93E-02 | -0,33 | 0,80 |
| ENSG00000152377 | SPOCK1   | 5,15E-03 | 4,93E-02 | 0,46  | 1,38 |
| ENSG00000100425 | BRD1     | 5,17E-03 | 4,94E-02 | -0,18 | 0,88 |
| ENSG00000137831 | UACA     | 5,18E-03 | 4,95E-02 | -0,18 | 0,88 |
| ENSG00000150753 | CCT5     | 5,20E-03 | 4,97E-02 | 0,20  | 1,15 |
| ENSG00000095380 | NANS     | 5,21E-03 | 4,97E-02 | 0,25  | 1,19 |
| ENSG00000159788 | RGS12    | 5,21E-03 | 4,98E-02 | -0,19 | 0,88 |
| ENSG00000144366 | GULP1    | 5,22E-03 | 4,98E-02 | -0,32 | 0,80 |
| ENSG00000205060 | SLC35B4  | 5,22E-03 | 4,98E-02 | 0,18  | 1,13 |
| ENSG00000103591 | AAGAB    | 5,23E-03 | 4,98E-02 | 0,28  | 1,21 |
| ENSG00000089063 | TMEM230  | 5,23E-03 | 4,98E-02 | 0,19  | 1,14 |
| ENSG00000159479 | MED8     | 5,25E-03 | 5,00E-02 | 0,16  | 1,12 |
| ENSG00000026103 | FAS      | 5,25E-03 | 5,00E-02 | 0,28  | 1,21 |
| ENSG00000158109 | TPRG1L   | 5,25E-03 | 5,00E-02 | -0,23 | 0,85 |
| ENSG00000149582 | TMEM25   | 5,26E-03 | 5,00E-02 | -0,32 | 0,80 |
| ENSG00000132603 | NIP7     | 5,26E-03 | 5,00E-02 | 0,26  | 1,20 |
