# Supplementary material for: RNA Sequencing Reveals Interacting Key Determinants of Osteoarthritis Acting in Subchondral Bone and Articular Cartilage: Identification of IL11 and CHADL as Attractive Treatment Targets
Source: PubMed Central journal article supplement — Arthritis Rheumatol. 2021 Mar 21;73(5):789–99. doi: 10.1002/art.41600 (PMC8252798; doi:10.1002/art.41600), 2021-03-21
Supplement: ART-73-789-s006.pdf [file ART-73-789-s006.pdf]

**Supplementary table 3:** Significantly differentially expressed genes between lesioned and preserved OA subchondral bone.

| Ensembl gene ID | Gene       | P-value  | FDR      | Log 2 fold change | Fold change |
|-----------------|------------|----------|----------|-------------------|-------------|
| ENSG00000162998 | FRZB       | 2,52E-11 | 3,99E-07 | -0,90             | 0,53        |
| ENSG00000157103 | SLC6A1     | 6,36E-09 | 3,36E-05 | -0,71             | 0,61        |
| ENSG00000174469 | CNTNAP2    | 6,16E-09 | 3,36E-05 | 1,27              | 2,42        |
| ENSG00000162105 | SHANK2     | 1,12E-08 | 4,43E-05 | -1,15             | 0,45        |
| ENSG00000054938 | CHRD2      | 4,10E-08 | 1,20E-04 | -2,85             | 0,14        |
| ENSG00000223561 | AC005165.1 | 4,54E-08 | 1,20E-04 | -1,23             | 0,43        |
| ENSG00000179399 | GPC5       | 7,22E-08 | 1,27E-04 | -1,22             | 0,43        |
| ENSG00000159307 | SCUBE1     | 6,66E-08 | 1,27E-04 | -0,84             | 0,56        |
| ENSG00000198918 | RPL39      | 7,12E-08 | 1,27E-04 | 0,39              | 1,31        |
| ENSG00000116285 | ERRFI1     | 8,10E-08 | 1,28E-04 | 0,57              | 1,48        |
| ENSG00000102466 | FGF14      | 1,67E-07 | 1,89E-04 | -1,29             | 0,41        |
| ENSG00000007314 | SCN4A      | 1,42E-07 | 1,89E-04 | -0,63             | 0,65        |
| ENSG00000251322 | SHANK3     | 1,61E-07 | 1,89E-04 | -0,51             | 0,70        |
| ENSG00000144867 | SRPRB      | 1,67E-07 | 1,89E-04 | 0,45              | 1,36        |
| ENSG00000037042 | TUBG2      | 2,74E-07 | 2,89E-04 | -0,36             | 0,78        |
| ENSG00000196104 | SPOCK3     | 3,44E-07 | 3,41E-04 | -2,07             | 0,24        |
| ENSG00000169871 | TRIM56     | 4,18E-07 | 3,90E-04 | -0,31             | 0,81        |
| ENSG00000134014 | ELP3       | 5,24E-07 | 4,61E-04 | 0,20              | 1,15        |
| ENSG00000106511 | MEOX2      | 6,35E-07 | 5,30E-04 | -0,52             | 0,70        |
| ENSG00000130158 | DOCK6      | 7,38E-07 | 5,57E-04 | -0,41             | 0,75        |
| ENSG00000257017 | HP         | 7,30E-07 | 5,57E-04 | 1,37              | 2,59        |
| ENSG00000136237 | RAPGEF5    | 8,72E-07 | 6,28E-04 | -0,47             | 0,72        |
| ENSG00000163884 | KLF15      | 9,79E-07 | 6,46E-04 | -0,67             | 0,63        |
| ENSG00000204301 | NOTCH4     | 9,58E-07 | 6,46E-04 | -0,41             | 0,75        |
| ENSG00000234797 | RPS3AP6    | 1,02E-06 | 6,46E-04 | 0,25              | 1,19        |
| ENSG00000154783 | FGD5       | 1,21E-06 | 6,88E-04 | -0,35             | 0,78        |
| ENSG00000151025 | GPR158     | 1,17E-06 | 6,88E-04 | 1,21              | 2,31        |
| ENSG00000064886 | CHI3L2     | 1,22E-06 | 6,88E-04 | 1,26              | 2,40        |
| ENSG00000002745 | WNT16      | 1,26E-06 | 6,88E-04 | 2,12              | 4,35        |
| ENSG00000130300 | PLVAP      | 1,42E-06 | 7,33E-04 | -0,46             | 0,73        |
| ENSG00000252835 | SCARNA21   | 1,43E-06 | 7,33E-04 | 0,37              | 1,29        |
| ENSG00000115616 | SLC9A2     | 1,62E-06 | 8,01E-04 | 1,53              | 2,89        |
| ENSG00000232044 | SILC1      | 1,79E-06 | 8,60E-04 | 1,09              | 2,13        |
| ENSG00000112306 | RPS12      | 1,89E-06 | 8,81E-04 | 0,23              | 1,17        |
| ENSG00000128917 | DLL4       | 2,13E-06 | 9,31E-04 | -0,63             | 0,65        |
| ENSG00000146830 | GIGYF1     | 2,07E-06 | 9,31E-04 | -0,29             | 0,82        |
| ENSG00000225178 | RPSAP58    | 2,17E-06 | 9,31E-04 | 0,28              | 1,21        |
| ENSG00000173801 | JUP        | 2,48E-06 | 1,03E-03 | -0,51             | 0,70        |
| ENSG00000123610 | TNFAIP6    | 2,53E-06 | 1,03E-03 | 0,95              | 1,93        |
| ENSG00000148400 | NOTCH1     | 2,67E-06 | 1,06E-03 | -0,53             | 0,69        |
| ENSG00000089157 | RPLP0      | 2,84E-06 | 1,10E-03 | 0,28              | 1,22        |
| ENSG00000229847 | EMX2OS     | 3,07E-06 | 1,11E-03 | -1,26             | 0,42        |
| ENSG00000115128 | SF3B6      | 2,98E-06 | 1,11E-03 | 0,25              | 1,19        |
| ENSG00000148848 | ADAM12     | 3,02E-06 | 1,11E-03 | 0,80              | 1,75        |
| ENSG00000163902 | RPN1       | 3,18E-06 | 1,12E-03 | 0,20              | 1,15        |
| ENSG00000149380 | P4HA3      | 3,24E-06 | 1,12E-03 | 1,04              | 2,05        |

|                 |           |          |          |       |      |
|-----------------|-----------|----------|----------|-------|------|
| ENSG00000078018 | MAP2      | 3,77E-06 | 1,27E-03 | -0,44 | 0,74 |
| ENSG00000133030 | MPRIIP    | 4,30E-06 | 1,36E-03 | -0,27 | 0,83 |
| ENSG00000091317 | CMTM6     | 4,27E-06 | 1,36E-03 | 0,26  | 1,20 |
| ENSG00000166426 | CRABP1    | 4,26E-06 | 1,36E-03 | 1,43  | 2,69 |
| ENSG00000128590 | DNAJB9    | 4,44E-06 | 1,38E-03 | 0,37  | 1,29 |
| ENSG00000163479 | SSR2      | 4,63E-06 | 1,41E-03 | 0,26  | 1,20 |
| ENSG00000074181 | NOTCH3    | 4,90E-06 | 1,44E-03 | -0,52 | 0,70 |
| ENSG00000198856 | OSTC      | 4,82E-06 | 1,44E-03 | 0,55  | 1,46 |
| ENSG00000139613 | SMARCC2   | 5,15E-06 | 1,49E-03 | -0,22 | 0,86 |
| ENSG00000150938 | CRIM1     | 5,45E-06 | 1,54E-03 | -0,48 | 0,72 |
| ENSG00000153707 | PTPRD     | 5,52E-06 | 1,54E-03 | 0,56  | 1,47 |
| ENSG00000099365 | STX1B     | 5,64E-06 | 1,54E-03 | -0,85 | 0,56 |
| ENSG00000086598 | TMED2     | 6,19E-06 | 1,66E-03 | 0,24  | 1,18 |
| ENSG00000140464 | PML       | 6,45E-06 | 1,70E-03 | -0,30 | 0,81 |
| ENSG00000145425 | RPS3A     | 6,82E-06 | 1,77E-03 | 0,24  | 1,18 |
| ENSG00000070669 | ASNS      | 7,09E-06 | 1,81E-03 | 0,42  | 1,34 |
| ENSG00000197442 | MAP3K5    | 7,33E-06 | 1,84E-03 | -0,26 | 0,84 |
| ENSG00000173227 | SYT12     | 7,86E-06 | 1,90E-03 | -0,57 | 0,67 |
| ENSG00000142937 | RPS8      | 7,84E-06 | 1,90E-03 | 0,20  | 1,15 |
| ENSG00000211448 | DIO2      | 7,92E-06 | 1,90E-03 | 1,02  | 2,02 |
| ENSG00000111077 | TNS2      | 8,20E-06 | 1,92E-03 | -0,46 | 0,73 |
| ENSG00000226221 | RPL26P19  | 8,34E-06 | 1,92E-03 | 0,25  | 1,19 |
| ENSG00000179933 | C14orf119 | 8,26E-06 | 1,92E-03 | 0,28  | 1,21 |
| ENSG00000153993 | SEMA3D    | 8,48E-06 | 1,92E-03 | 0,77  | 1,70 |
| ENSG00000145911 | N4BP3     | 8,97E-06 | 1,92E-03 | -0,57 | 0,68 |
| ENSG00000117036 | ETV3      | 8,91E-06 | 1,92E-03 | -0,24 | 0,84 |
| ENSG00000168685 | IL7R      | 8,63E-06 | 1,92E-03 | 0,80  | 1,74 |
| ENSG00000198768 | APCDD1L   | 8,83E-06 | 1,92E-03 | 1,97  | 3,93 |
| ENSG00000010319 | SEMA3G    | 9,63E-06 | 2,04E-03 | -0,67 | 0,63 |
| ENSG00000127184 | COX7C     | 9,80E-06 | 2,04E-03 | 0,26  | 1,19 |
| ENSG00000179542 | SLITRK4   | 1,01E-05 | 2,06E-03 | -0,51 | 0,70 |
| ENSG00000143842 | SOX13     | 1,02E-05 | 2,06E-03 | -0,42 | 0,75 |
| ENSG00000124440 | HIF3A     | 1,05E-05 | 2,07E-03 | -1,02 | 0,49 |
| ENSG00000204580 | DDR1      | 1,05E-05 | 2,07E-03 | -0,39 | 0,76 |
| ENSG00000165194 | PCDH19    | 1,06E-05 | 2,08E-03 | -0,78 | 0,58 |
| ENSG00000174514 | MFSD4A    | 1,13E-05 | 2,15E-03 | -0,76 | 0,59 |
| ENSG00000175061 | SNHG29    | 1,12E-05 | 2,15E-03 | 0,21  | 1,16 |
| ENSG00000079246 | XRCC5     | 1,16E-05 | 2,19E-03 | 0,13  | 1,10 |
| ENSG00000175161 | CADM2     | 1,21E-05 | 2,22E-03 | -1,29 | 0,41 |
| ENSG00000161940 | BCL6B     | 1,21E-05 | 2,22E-03 | -0,52 | 0,70 |
| ENSG00000066056 | TIE1      | 1,25E-05 | 2,28E-03 | -0,38 | 0,77 |
| ENSG00000179314 | WSCD1     | 1,35E-05 | 2,30E-03 | -0,68 | 0,63 |
| ENSG00000132024 | CC2D1A    | 1,34E-05 | 2,30E-03 | -0,25 | 0,84 |
| ENSG00000182774 | RPS17     | 1,29E-05 | 2,30E-03 | 0,20  | 1,15 |
| ENSG00000136868 | SLC31A1   | 1,32E-05 | 2,30E-03 | 0,29  | 1,22 |
| ENSG00000052850 | ALX4      | 1,28E-05 | 2,30E-03 | 1,06  | 2,08 |
| ENSG00000144057 | ST6GAL2   | 1,34E-05 | 2,30E-03 | 1,52  | 2,87 |
| ENSG00000110237 | ARHGEF17  | 1,37E-05 | 2,31E-03 | -0,36 | 0,78 |
| ENSG00000231711 | LINC00899 | 1,40E-05 | 2,34E-03 | -0,33 | 0,79 |
| ENSG00000119523 | ALG2      | 1,41E-05 | 2,34E-03 | 0,22  | 1,16 |

|                 |            |          |          |       |      |
|-----------------|------------|----------|----------|-------|------|
| ENSG00000104435 | STMN2      | 1,45E-05 | 2,36E-03 | 3,26  | 9,56 |
| ENSG00000112511 | PHF1       | 1,53E-05 | 2,44E-03 | -0,29 | 0,82 |
| ENSG00000113732 | ATP6VOE1   | 1,54E-05 | 2,44E-03 | 0,32  | 1,25 |
| ENSG00000095752 | IL11       | 1,52E-05 | 2,44E-03 | 2,06  | 4,16 |
| ENSG00000091592 | NLRP1      | 1,58E-05 | 2,45E-03 | -0,25 | 0,84 |
| ENSG00000171517 | LPAR3      | 1,57E-05 | 2,45E-03 | 0,89  | 1,86 |
| ENSG00000187244 | BCAM       | 1,64E-05 | 2,50E-03 | -0,48 | 0,72 |
| ENSG00000118849 | RARRES1    | 1,62E-05 | 2,50E-03 | 0,82  | 1,77 |
| ENSG00000143543 | JTB        | 1,76E-05 | 2,65E-03 | 0,30  | 1,23 |
| ENSG00000059122 | FLYWCH1    | 1,92E-05 | 2,87E-03 | -0,30 | 0,81 |
| ENSG00000167037 | SGSM1      | 1,96E-05 | 2,89E-03 | -0,67 | 0,63 |
| ENSG00000184500 | PROS1      | 2,00E-05 | 2,89E-03 | 0,29  | 1,22 |
| ENSG00000116157 | GPX7       | 1,99E-05 | 2,89E-03 | 0,59  | 1,50 |
| ENSG00000178445 | GLDC       | 1,99E-05 | 2,89E-03 | 1,22  | 2,33 |
| ENSG00000057608 | GDI2       | 2,05E-05 | 2,93E-03 | 0,19  | 1,14 |
| ENSG00000229132 | EIF4A1P10  | 2,11E-05 | 2,99E-03 | 0,32  | 1,25 |
| ENSG00000154133 | ROBO4      | 2,16E-05 | 3,04E-03 | -0,48 | 0,72 |
| ENSG00000214389 | RPS3AP26   | 2,20E-05 | 3,06E-03 | 0,23  | 1,18 |
| ENSG00000135404 | CD63       | 2,23E-05 | 3,08E-03 | 0,24  | 1,18 |
| ENSG00000141431 | ASXL3      | 2,27E-05 | 3,09E-03 | -0,69 | 0,62 |
| ENSG00000069020 | MAST4      | 2,28E-05 | 3,09E-03 | -0,42 | 0,75 |
| ENSG00000138829 | FBN2       | 2,31E-05 | 3,10E-03 | 0,74  | 1,67 |
| ENSG00000198844 | ARHGEF15   | 2,34E-05 | 3,12E-03 | -0,41 | 0,75 |
| ENSG00000167244 | IGF2       | 2,38E-05 | 3,15E-03 | -0,49 | 0,71 |
| ENSG00000075415 | SLC25A3    | 2,43E-05 | 3,15E-03 | 0,13  | 1,10 |
| ENSG00000141543 | EIF4A3     | 2,42E-05 | 3,15E-03 | 0,18  | 1,14 |
| ENSG00000171056 | SOX7       | 2,49E-05 | 3,16E-03 | -0,59 | 0,66 |
| ENSG00000136854 | STXBP1     | 2,47E-05 | 3,16E-03 | -0,43 | 0,74 |
| ENSG00000168297 | PXK        | 2,49E-05 | 3,16E-03 | 0,27  | 1,20 |
| ENSG00000149930 | TAOK2      | 2,54E-05 | 3,19E-03 | -0,19 | 0,88 |
| ENSG00000130653 | PNPLA7     | 2,56E-05 | 3,20E-03 | -0,51 | 0,70 |
| ENSG00000213553 | RPLPOP6    | 2,65E-05 | 3,25E-03 | 0,28  | 1,22 |
| ENSG00000170961 | HAS2       | 2,64E-05 | 3,25E-03 | 0,69  | 1,61 |
| ENSG00000083720 | OXCT1      | 2,67E-05 | 3,26E-03 | 0,33  | 1,25 |
| ENSG00000089009 | RPL6       | 2,70E-05 | 3,27E-03 | 0,18  | 1,13 |
| ENSG00000104881 | PPP1R13L   | 2,74E-05 | 3,29E-03 | -0,43 | 0,74 |
| ENSG00000116209 | TMEM59     | 2,80E-05 | 3,33E-03 | 0,23  | 1,18 |
| ENSG00000114812 | VIPR1      | 2,82E-05 | 3,34E-03 | -0,53 | 0,69 |
| ENSG00000177169 | ULK1       | 2,85E-05 | 3,35E-03 | -0,29 | 0,82 |
| ENSG00000204977 | TRIM13     | 2,89E-05 | 3,37E-03 | 0,19  | 1,14 |
| ENSG00000256968 | SNRPEP2    | 2,94E-05 | 3,40E-03 | 0,70  | 1,62 |
| ENSG00000249378 | LINC01060  | 2,98E-05 | 3,42E-03 | 1,18  | 2,27 |
| ENSG00000138162 | TACC2      | 3,05E-05 | 3,48E-03 | -0,55 | 0,68 |
| ENSG00000225200 | AC246787.1 | 3,07E-05 | 3,48E-03 | 0,26  | 1,20 |
| ENSG00000165757 | JCAD       | 3,13E-05 | 3,52E-03 | -0,45 | 0,73 |
| ENSG00000140538 | NTRK3      | 3,37E-05 | 3,56E-03 | -0,51 | 0,70 |
| ENSG00000132003 | ZSWIM4     | 3,27E-05 | 3,56E-03 | -0,44 | 0,73 |
| ENSG00000130787 | HIP1R      | 3,20E-05 | 3,56E-03 | -0,34 | 0,79 |
| ENSG00000120318 | ARAP3      | 3,34E-05 | 3,56E-03 | -0,23 | 0,85 |
| ENSG00000122406 | RPL5       | 3,32E-05 | 3,56E-03 | 0,16  | 1,12 |

|                 |          |          |          |       |      |
|-----------------|----------|----------|----------|-------|------|
| ENSG00000156508 | EEF1A1   | 3,35E-05 | 3,56E-03 | 0,18  | 1,13 |
| ENSG00000125691 | RPL23    | 3,24E-05 | 3,56E-03 | 0,19  | 1,14 |
| ENSG00000124172 | ATP5F1E  | 3,22E-05 | 3,56E-03 | 0,22  | 1,17 |
| ENSG00000106819 | ASPN     | 3,33E-05 | 3,56E-03 | 1,66  | 3,17 |
| ENSG00000228929 | RPS13P2  | 3,41E-05 | 3,58E-03 | 0,27  | 1,21 |
| ENSG00000116396 | KCNC4    | 3,44E-05 | 3,59E-03 | -0,33 | 0,80 |
| ENSG00000079337 | RAPGEF3  | 3,52E-05 | 3,65E-03 | -0,37 | 0,78 |
| ENSG00000152818 | UTRN     | 3,54E-05 | 3,65E-03 | -0,22 | 0,86 |
| ENSG00000173210 | ABLIM3   | 3,62E-05 | 3,70E-03 | -0,40 | 0,76 |
| ENSG00000145685 | LHFPL2   | 3,64E-05 | 3,70E-03 | 0,40  | 1,32 |
| ENSG00000177103 | DSCAML1  | 3,77E-05 | 3,75E-03 | -0,66 | 0,63 |
| ENSG00000260139 | CSPG4P13 | 3,74E-05 | 3,75E-03 | -0,58 | 0,67 |
| ENSG00000275023 | MLLT6    | 3,83E-05 | 3,75E-03 | -0,24 | 0,85 |
| ENSG00000087302 | RTRAF    | 3,80E-05 | 3,75E-03 | 0,20  | 1,15 |
| ENSG00000164932 | CTHRC1   | 3,83E-05 | 3,75E-03 | 1,10  | 2,15 |
| ENSG00000168542 | COL3A1   | 3,82E-05 | 3,75E-03 | 1,19  | 2,29 |
| ENSG00000093167 | LRRFIP2  | 3,92E-05 | 3,81E-03 | 0,31  | 1,24 |
| ENSG00000187595 | ZNF385C  | 3,96E-05 | 3,82E-03 | -0,98 | 0,51 |
| ENSG00000174669 | SLC29A2  | 4,05E-05 | 3,82E-03 | -0,81 | 0,57 |
| ENSG00000048540 | LMO3     | 4,11E-05 | 3,82E-03 | -0,79 | 0,58 |
| ENSG00000156030 | ELMSAN1  | 4,12E-05 | 3,82E-03 | -0,37 | 0,78 |
| ENSG00000143614 | GATAD2B  | 4,09E-05 | 3,82E-03 | -0,27 | 0,83 |
| ENSG00000196205 | EEF1A1P5 | 4,08E-05 | 3,82E-03 | 0,19  | 1,14 |
| ENSG00000116459 | ATP5PB   | 4,02E-05 | 3,82E-03 | 0,21  | 1,16 |
| ENSG00000234782 | TPT1P9   | 4,01E-05 | 3,82E-03 | 0,28  | 1,21 |
| ENSG00000074695 | LMAN1    | 4,18E-05 | 3,86E-03 | 0,26  | 1,20 |
| ENSG00000187231 | SESTD1   | 4,30E-05 | 3,94E-03 | -0,29 | 0,82 |
| ENSG00000115306 | SPTBN1   | 4,38E-05 | 3,99E-03 | -0,49 | 0,71 |
| ENSG00000157110 | RBPMS    | 4,40E-05 | 3,99E-03 | -0,45 | 0,73 |
| ENSG00000131238 | PPT1     | 4,51E-05 | 4,07E-03 | 0,19  | 1,14 |
| ENSG00000005379 | TSPOAP1  | 4,55E-05 | 4,08E-03 | -0,32 | 0,80 |
| ENSG00000177303 | CASKIN2  | 4,68E-05 | 4,15E-03 | -0,40 | 0,76 |
| ENSG00000088888 | MAVS     | 4,68E-05 | 4,15E-03 | -0,19 | 0,88 |
| ENSG00000152284 | TCF7L1   | 4,75E-05 | 4,16E-03 | -0,51 | 0,70 |
| ENSG00000055483 | USP36    | 4,77E-05 | 4,16E-03 | -0,22 | 0,86 |
| ENSG00000146731 | CCT6A    | 4,73E-05 | 4,16E-03 | 0,23  | 1,17 |
| ENSG00000120733 | KDM3B    | 4,82E-05 | 4,17E-03 | -0,20 | 0,87 |
| ENSG00000152234 | ATP5F1A  | 4,87E-05 | 4,19E-03 | 0,18  | 1,13 |
| ENSG00000068784 | SRBD1    | 4,94E-05 | 4,23E-03 | 0,23  | 1,17 |
| ENSG00000213672 | NCKIPSD  | 5,04E-05 | 4,28E-03 | -0,31 | 0,81 |
| ENSG00000178971 | CTC1     | 5,04E-05 | 4,28E-03 | -0,25 | 0,84 |
| ENSG00000163597 | SNHG16   | 5,10E-05 | 4,28E-03 | 0,14  | 1,10 |
| ENSG00000196305 | IARS     | 5,08E-05 | 4,28E-03 | 0,27  | 1,21 |
| ENSG00000231500 | RPS18    | 5,14E-05 | 4,29E-03 | 0,18  | 1,14 |
| ENSG00000198755 | RPL10A   | 5,28E-05 | 4,33E-03 | 0,19  | 1,14 |
| ENSG00000110218 | PANX1    | 5,30E-05 | 4,33E-03 | 0,26  | 1,20 |
| ENSG00000134825 | TMEM258  | 5,27E-05 | 4,33E-03 | 0,27  | 1,20 |
| ENSG00000126709 | IFI6     | 5,26E-05 | 4,33E-03 | 0,32  | 1,25 |
| ENSG00000169418 | NPR1     | 5,52E-05 | 4,39E-03 | -0,60 | 0,66 |
| ENSG00000100234 | TIMP3    | 5,50E-05 | 4,39E-03 | -0,52 | 0,70 |

|                 |          |          |          |       |      |
|-----------------|----------|----------|----------|-------|------|
| ENSG00000130702 | LAMA5    | 5,47E-05 | 4,39E-03 | -0,42 | 0,75 |
| ENSG00000092421 | SEMA6A   | 5,53E-05 | 4,39E-03 | -0,40 | 0,76 |
| ENSG00000033327 | GAB2     | 5,49E-05 | 4,39E-03 | -0,34 | 0,79 |
| ENSG00000177728 | TMEM94   | 5,50E-05 | 4,39E-03 | -0,28 | 0,82 |
| ENSG00000165699 | TSC1     | 5,60E-05 | 4,39E-03 | -0,16 | 0,89 |
| ENSG00000143183 | TMCO1    | 5,59E-05 | 4,39E-03 | 0,19  | 1,14 |
| ENSG00000123500 | COL10A1  | 5,83E-05 | 4,43E-03 | -0,90 | 0,54 |
| ENSG00000171992 | SYNPO    | 5,84E-05 | 4,43E-03 | -0,44 | 0,74 |
| ENSG00000110955 | ATP5F1B  | 5,80E-05 | 4,43E-03 | 0,17  | 1,12 |
| ENSG00000153029 | MR1      | 5,80E-05 | 4,43E-03 | 0,18  | 1,13 |
| ENSG00000205581 | HMG1     | 5,82E-05 | 4,43E-03 | 0,25  | 1,19 |
| ENSG00000234882 | EIF3EP1  | 5,84E-05 | 4,43E-03 | 0,33  | 1,25 |
| ENSG00000125848 | FLRT3    | 5,77E-05 | 4,43E-03 | 0,71  | 1,64 |
| ENSG00000125304 | TM9SF2   | 6,02E-05 | 4,54E-03 | 0,21  | 1,16 |
| ENSG00000177464 | GPR4     | 6,07E-05 | 4,56E-03 | -0,59 | 0,67 |
| ENSG00000100307 | CBX7     | 6,19E-05 | 4,60E-03 | -0,44 | 0,73 |
| ENSG00000106809 | OGN      | 6,24E-05 | 4,62E-03 | 1,78  | 3,43 |
| ENSG00000151468 | CCDC3    | 6,38E-05 | 4,67E-03 | -0,42 | 0,74 |
| ENSG00000167522 | ANKRD11  | 6,39E-05 | 4,67E-03 | -0,28 | 0,83 |
| ENSG00000164405 | UQCRCQ   | 6,36E-05 | 4,67E-03 | 0,28  | 1,21 |
| ENSG00000115468 | EFHD1    | 6,44E-05 | 4,68E-03 | -0,56 | 0,68 |
| ENSG00000213741 | RPS29    | 6,47E-05 | 4,68E-03 | 0,24  | 1,18 |
| ENSG00000088367 | EPB41L1  | 6,57E-05 | 4,71E-03 | -0,49 | 0,71 |
| ENSG00000182606 | TRAK1    | 6,55E-05 | 4,71E-03 | -0,23 | 0,85 |
| ENSG00000162654 | GBP4     | 6,80E-05 | 4,83E-03 | -0,33 | 0,80 |
| ENSG00000082212 | ME2      | 6,80E-05 | 4,83E-03 | 0,29  | 1,22 |
| ENSG00000122133 | PAEP     | 6,99E-05 | 4,87E-03 | -0,92 | 0,53 |
| ENSG00000109794 | FAM149A  | 6,98E-05 | 4,87E-03 | -0,52 | 0,70 |
| ENSG00000266714 | MYO15B   | 6,95E-05 | 4,87E-03 | -0,31 | 0,80 |
| ENSG00000213719 | CLIC1    | 7,01E-05 | 4,87E-03 | 0,17  | 1,13 |
| ENSG00000168907 | PLA2G4F  | 6,91E-05 | 4,87E-03 | 1,19  | 2,28 |
| ENSG00000170271 | FAXDC2   | 7,05E-05 | 4,88E-03 | -0,36 | 0,78 |
| ENSG00000149100 | EIF3M    | 7,15E-05 | 4,92E-03 | 0,15  | 1,11 |
| ENSG00000198551 | ZNF627   | 7,20E-05 | 4,92E-03 | 0,22  | 1,17 |
| ENSG00000106080 | FKBP14   | 7,19E-05 | 4,92E-03 | 0,43  | 1,35 |
| ENSG00000090447 | TFAP4    | 7,28E-05 | 4,93E-03 | -0,34 | 0,79 |
| ENSG00000174282 | ZBTB4    | 7,27E-05 | 4,93E-03 | -0,32 | 0,80 |
| ENSG00000136383 | ALPK3    | 7,43E-05 | 4,94E-03 | -0,57 | 0,68 |
| ENSG00000111676 | ATN1     | 7,40E-05 | 4,94E-03 | -0,40 | 0,76 |
| ENSG00000174059 | CD34     | 7,45E-05 | 4,94E-03 | -0,36 | 0,78 |
| ENSG00000116604 | MEF2D    | 7,41E-05 | 4,94E-03 | -0,31 | 0,80 |
| ENSG00000159200 | RCAN1    | 7,39E-05 | 4,94E-03 | 0,44  | 1,35 |
| ENSG00000166987 | MBD6     | 7,76E-05 | 5,13E-03 | -0,34 | 0,79 |
| ENSG00000112972 | HMGCS1   | 7,87E-05 | 5,16E-03 | 0,20  | 1,14 |
| ENSG00000073969 | NSF      | 7,88E-05 | 5,16E-03 | 0,22  | 1,16 |
| ENSG00000131469 | RPL27    | 8,03E-05 | 5,24E-03 | 0,20  | 1,15 |
| ENSG00000166106 | ADAMTS15 | 8,08E-05 | 5,25E-03 | -0,75 | 0,59 |
| ENSG00000187800 | PEAR1    | 8,17E-05 | 5,29E-03 | -0,39 | 0,76 |
| ENSG00000184481 | FOXO4    | 8,24E-05 | 5,29E-03 | -0,35 | 0,79 |
| ENSG00000229638 | RPL4P4   | 8,21E-05 | 5,29E-03 | 0,21  | 1,15 |

|                 |           |          |          |       |      |
|-----------------|-----------|----------|----------|-------|------|
| ENSG00000133112 | TPT1      | 8,28E-05 | 5,29E-03 | 0,20  | 1,15 |
| ENSG00000081277 | PKP1      | 8,36E-05 | 5,32E-03 | -0,80 | 0,57 |
| ENSG00000061273 | HDAC7     | 8,41E-05 | 5,33E-03 | -0,23 | 0,85 |
| ENSG00000124191 | TOX2      | 8,81E-05 | 5,46E-03 | -0,61 | 0,65 |
| ENSG00000187678 | SPRY4     | 8,76E-05 | 5,46E-03 | -0,43 | 0,74 |
| ENSG00000116016 | EPAS1     | 8,65E-05 | 5,46E-03 | -0,40 | 0,76 |
| ENSG00000168028 | RPSA      | 8,85E-05 | 5,46E-03 | 0,24  | 1,18 |
| ENSG00000169902 | TPST1     | 8,76E-05 | 5,46E-03 | 0,54  | 1,45 |
| ENSG00000104415 | CCN4      | 8,83E-05 | 5,46E-03 | 0,66  | 1,58 |
| ENSG00000164023 | SGMS2     | 8,73E-05 | 5,46E-03 | 0,70  | 1,62 |
| ENSG00000186335 | SLC36A2   | 8,89E-05 | 5,46E-03 | 0,80  | 1,74 |
| ENSG00000172830 | SSH3      | 9,45E-05 | 5,79E-03 | -0,27 | 0,83 |
| ENSG00000109501 | WFS1      | 9,58E-05 | 5,82E-03 | -0,52 | 0,70 |
| ENSG00000064393 | HIPK2     | 9,57E-05 | 5,82E-03 | -0,38 | 0,77 |
| ENSG00000126217 | MCF2L     | 9,63E-05 | 5,82E-03 | -0,38 | 0,77 |
| ENSG00000137497 | NUMA1     | 9,66E-05 | 5,82E-03 | -0,24 | 0,85 |
| ENSG00000076924 | XAB2      | 9,87E-05 | 5,90E-03 | -0,24 | 0,85 |
| ENSG00000029364 | SLC39A9   | 9,86E-05 | 5,90E-03 | 0,14  | 1,11 |
| ENSG00000203883 | SOX18     | 1,00E-04 | 5,92E-03 | -0,58 | 0,67 |
| ENSG00000166888 | STAT6     | 1,00E-04 | 5,92E-03 | -0,18 | 0,88 |
| ENSG00000154473 | BUB3      | 1,00E-04 | 5,92E-03 | 0,17  | 1,12 |
| ENSG00000136261 | BZW2      | 1,00E-04 | 5,92E-03 | 0,30  | 1,23 |
| ENSG00000107249 | GLIS3     | 1,01E-04 | 5,95E-03 | 0,54  | 1,45 |
| ENSG00000185361 | TNFAIP8L1 | 1,03E-04 | 5,96E-03 | -0,37 | 0,77 |
| ENSG00000132963 | POMP      | 1,03E-04 | 5,96E-03 | 0,28  | 1,21 |
| ENSG00000122824 | NUDT10    | 1,02E-04 | 5,96E-03 | 0,58  | 1,50 |
| ENSG00000110046 | ATG2A     | 1,03E-04 | 5,98E-03 | -0,26 | 0,84 |
| ENSG00000213694 | S1PR3     | 1,04E-04 | 6,00E-03 | 0,69  | 1,62 |
| ENSG00000174574 | AKIRIN1   | 1,05E-04 | 6,00E-03 | 0,19  | 1,14 |
| ENSG00000168702 | LRP1B     | 1,05E-04 | 6,01E-03 | -0,57 | 0,67 |
| ENSG00000143603 | KCNN3     | 1,06E-04 | 6,04E-03 | -0,44 | 0,74 |
| ENSG00000169635 | HIC2      | 1,06E-04 | 6,04E-03 | -0,31 | 0,81 |
| ENSG00000119335 | SET       | 1,10E-04 | 6,25E-03 | 0,15  | 1,11 |
| ENSG00000099256 | PRTFDC1   | 1,11E-04 | 6,25E-03 | 0,38  | 1,30 |
| ENSG00000115884 | SDC1      | 1,11E-04 | 6,25E-03 | 0,45  | 1,37 |
| ENSG00000116584 | ARHGEF2   | 1,13E-04 | 6,33E-03 | -0,22 | 0,86 |
| ENSG00000125869 | LAMP5     | 1,13E-04 | 6,33E-03 | 0,71  | 1,63 |
| ENSG00000158258 | CLSTN2    | 1,15E-04 | 6,38E-03 | -0,59 | 0,66 |
| ENSG00000146067 | FAM193B   | 1,16E-04 | 6,45E-03 | -0,23 | 0,85 |
| ENSG00000181035 | SLC25A42  | 1,17E-04 | 6,48E-03 | -0,26 | 0,83 |
| ENSG00000103319 | EEF2K     | 1,18E-04 | 6,50E-03 | -0,21 | 0,86 |
| ENSG00000215018 | COL28A1   | 1,18E-04 | 6,50E-03 | 0,74  | 1,66 |
| ENSG00000038427 | VCAN      | 1,19E-04 | 6,51E-03 | 0,61  | 1,53 |
| ENSG00000167191 | GPRC5B    | 1,20E-04 | 6,52E-03 | -0,34 | 0,79 |
| ENSG00000128595 | CALU      | 1,20E-04 | 6,52E-03 | 0,38  | 1,30 |
| ENSG00000140443 | IGF1R     | 1,21E-04 | 6,53E-03 | -0,34 | 0,79 |
| ENSG00000100302 | RASD2     | 1,23E-04 | 6,54E-03 | -0,69 | 0,62 |
| ENSG00000182263 | FIGN      | 1,23E-04 | 6,54E-03 | -0,63 | 0,65 |
| ENSG00000225630 | MTND2P28  | 1,23E-04 | 6,54E-03 | -0,58 | 0,67 |
| ENSG00000164659 | KIAA1324L | 1,23E-04 | 6,54E-03 | -0,39 | 0,76 |

|                 |            |          |          |       |      |
|-----------------|------------|----------|----------|-------|------|
| ENSG00000102393 | GLA        | 1,22E-04 | 6,54E-03 | 0,28  | 1,22 |
| ENSG00000069849 | ATP1B3     | 1,22E-04 | 6,54E-03 | 0,37  | 1,29 |
| ENSG00000165795 | NDRG2      | 1,24E-04 | 6,55E-03 | -0,52 | 0,70 |
| ENSG00000140612 | SEC11A     | 1,26E-04 | 6,62E-03 | 0,20  | 1,15 |
| ENSG00000037280 | FLT4       | 1,28E-04 | 6,70E-03 | -0,32 | 0,80 |
| ENSG00000116288 | PARK7      | 1,28E-04 | 6,70E-03 | 0,21  | 1,16 |
| ENSG00000198833 | UBE2J1     | 1,30E-04 | 6,76E-03 | 0,22  | 1,16 |
| ENSG00000133056 | PIK3C2B    | 1,32E-04 | 6,84E-03 | -0,38 | 0,77 |
| ENSG00000171105 | INSR       | 1,34E-04 | 6,87E-03 | -0,31 | 0,81 |
| ENSG00000234741 | GAS5       | 1,34E-04 | 6,87E-03 | 0,22  | 1,17 |
| ENSG00000200087 | SNORA73B   | 1,34E-04 | 6,87E-03 | 0,43  | 1,35 |
| ENSG00000134901 | KDELC1     | 1,33E-04 | 6,87E-03 | 0,52  | 1,43 |
| ENSG00000165804 | ZNF219     | 1,37E-04 | 7,01E-03 | -0,43 | 0,74 |
| ENSG00000132646 | PCNA       | 1,38E-04 | 7,06E-03 | 0,26  | 1,20 |
| ENSG00000224470 | ATXN1L     | 1,40E-04 | 7,08E-03 | -0,23 | 0,85 |
| ENSG00000058799 | YIPF1      | 1,40E-04 | 7,08E-03 | 0,23  | 1,17 |
| ENSG00000198369 | SPRED2     | 1,44E-04 | 7,26E-03 | -0,37 | 0,78 |
| ENSG00000151917 | BEND6      | 1,45E-04 | 7,29E-03 | 0,71  | 1,64 |
| ENSG00000142784 | WDTC1      | 1,46E-04 | 7,34E-03 | -0,29 | 0,82 |
| ENSG00000181513 | ACBD4      | 1,49E-04 | 7,44E-03 | -0,31 | 0,81 |
| ENSG00000107816 | LZTS2      | 1,49E-04 | 7,44E-03 | -0,23 | 0,85 |
| ENSG00000132341 | RAN        | 1,51E-04 | 7,46E-03 | 0,22  | 1,16 |
| ENSG00000189043 | NDUFA4     | 1,51E-04 | 7,46E-03 | 0,31  | 1,24 |
| ENSG00000183255 | PTTG1IP    | 1,53E-04 | 7,53E-03 | 0,23  | 1,17 |
| ENSG00000110700 | RPS13      | 1,55E-04 | 7,63E-03 | 0,21  | 1,16 |
| ENSG00000084764 | MAPRE3     | 1,58E-04 | 7,74E-03 | -0,41 | 0,75 |
| ENSG00000266074 | BAHCC1     | 1,58E-04 | 7,74E-03 | -0,30 | 0,81 |
| ENSG00000105357 | MYH14      | 1,59E-04 | 7,74E-03 | -0,59 | 0,67 |
| ENSG00000173915 | ATP5MD     | 1,59E-04 | 7,74E-03 | 0,31  | 1,24 |
| ENSG00000126562 | WNK4       | 1,60E-04 | 7,75E-03 | -0,76 | 0,59 |
| ENSG00000122515 | ZMIZ2      | 1,63E-04 | 7,87E-03 | -0,25 | 0,84 |
| ENSG00000078687 | TNRC6C     | 1,64E-04 | 7,88E-03 | -0,26 | 0,84 |
| ENSG00000262877 | AC110285.2 | 1,65E-04 | 7,90E-03 | -0,48 | 0,72 |
| ENSG00000054277 | OPN3       | 1,65E-04 | 7,90E-03 | 0,43  | 1,34 |
| ENSG00000172901 | LVRN       | 1,66E-04 | 7,92E-03 | -0,56 | 0,68 |
| ENSG00000132622 | HSPA12B    | 1,67E-04 | 7,95E-03 | -0,39 | 0,76 |
| ENSG00000086570 | FAT2       | 1,68E-04 | 7,97E-03 | -0,92 | 0,53 |
| ENSG00000149115 | TNKS1BP1   | 1,68E-04 | 7,97E-03 | -0,38 | 0,77 |
| ENSG00000068697 | LAPTM4A    | 1,75E-04 | 8,27E-03 | 0,22  | 1,17 |
| ENSG00000106028 | SSBP1      | 1,77E-04 | 8,32E-03 | 0,20  | 1,15 |
| ENSG00000065154 | OAT        | 1,79E-04 | 8,41E-03 | 0,25  | 1,19 |
| ENSG00000186174 | BCL9L      | 1,80E-04 | 8,43E-03 | -0,38 | 0,77 |
| ENSG00000234093 | RPS15AP11  | 1,81E-04 | 8,44E-03 | 0,39  | 1,31 |
| ENSG00000006210 | CX3CL1     | 1,83E-04 | 8,51E-03 | -0,44 | 0,74 |
| ENSG00000244398 | AC116533.1 | 1,84E-04 | 8,52E-03 | 0,21  | 1,15 |
| ENSG00000072134 | EPN2       | 1,85E-04 | 8,56E-03 | -0,20 | 0,87 |
| ENSG00000113916 | BCL6       | 1,89E-04 | 8,59E-03 | -0,31 | 0,81 |
| ENSG00000124942 | AHNAK      | 1,89E-04 | 8,59E-03 | -0,30 | 0,81 |
| ENSG00000004700 | RECQL      | 1,88E-04 | 8,59E-03 | 0,20  | 1,15 |
| ENSG00000113643 | RARS       | 1,86E-04 | 8,59E-03 | 0,23  | 1,18 |

|                 |            |          |          |       |      |
|-----------------|------------|----------|----------|-------|------|
| ENSG00000139173 | TMEM117    | 1,88E-04 | 8,59E-03 | 0,39  | 1,31 |
| ENSG00000120254 | MTHFD1L    | 1,89E-04 | 8,59E-03 | 0,43  | 1,35 |
| ENSG00000024422 | EHD2       | 1,91E-04 | 8,66E-03 | -0,50 | 0,71 |
| ENSG00000136937 | NCBP1      | 1,93E-04 | 8,66E-03 | 0,22  | 1,17 |
| ENSG00000070882 | OSBPL3     | 1,93E-04 | 8,66E-03 | 0,26  | 1,20 |
| ENSG00000156869 | FRRS1      | 1,92E-04 | 8,66E-03 | 0,47  | 1,39 |
| ENSG00000186642 | PDE2A      | 1,96E-04 | 8,77E-03 | -0,39 | 0,76 |
| ENSG00000173327 | MAP3K11    | 1,97E-04 | 8,77E-03 | -0,25 | 0,84 |
| ENSG00000100311 | PDGFB      | 1,99E-04 | 8,84E-03 | -0,35 | 0,79 |
| ENSG00000108509 | CAMTA2     | 1,99E-04 | 8,86E-03 | -0,30 | 0,81 |
| ENSG00000129083 | COPB1      | 2,02E-04 | 8,90E-03 | 0,22  | 1,17 |
| ENSG00000118855 | MFSD1      | 2,02E-04 | 8,90E-03 | 0,25  | 1,19 |
| ENSG00000115604 | IL18R1     | 2,02E-04 | 8,90E-03 | 0,38  | 1,30 |
| ENSG00000169490 | TM2D2      | 2,03E-04 | 8,90E-03 | 0,20  | 1,15 |
| ENSG00000106066 | CPVL       | 2,04E-04 | 8,94E-03 | 0,33  | 1,26 |
| ENSG00000143409 | MINDY1     | 2,07E-04 | 9,05E-03 | -0,19 | 0,88 |
| ENSG00000198763 | MT-ND2     | 2,08E-04 | 9,06E-03 | -0,56 | 0,68 |
| ENSG00000174136 | RGMB       | 2,09E-04 | 9,08E-03 | -0,45 | 0,73 |
| ENSG00000047249 | ATP6V1H    | 2,11E-04 | 9,13E-03 | 0,24  | 1,18 |
| ENSG00000154153 | RETREG1    | 2,11E-04 | 9,13E-03 | 0,47  | 1,38 |
| ENSG00000171714 | ANO5       | 2,13E-04 | 9,19E-03 | 0,82  | 1,77 |
| ENSG00000146386 | ABRACL     | 2,17E-04 | 9,31E-03 | 0,47  | 1,39 |
| ENSG00000126351 | THRA       | 2,19E-04 | 9,37E-03 | -0,28 | 0,82 |
| ENSG00000114942 | EEF1B2     | 2,19E-04 | 9,37E-03 | 0,22  | 1,16 |
| ENSG00000043143 | JADE2      | 2,21E-04 | 9,41E-03 | -0,34 | 0,79 |
| ENSG00000164294 | GPX8       | 2,21E-04 | 9,41E-03 | 0,46  | 1,38 |
| ENSG00000148303 | RPL7A      | 2,24E-04 | 9,46E-03 | 0,17  | 1,13 |
| ENSG00000001036 | FUCA2      | 2,24E-04 | 9,46E-03 | 0,22  | 1,16 |
| ENSG00000123975 | CKS2       | 2,24E-04 | 9,46E-03 | 0,59  | 1,51 |
| ENSG00000130723 | PRRC2B     | 2,25E-04 | 9,47E-03 | -0,27 | 0,83 |
| ENSG00000122877 | EGR2       | 2,26E-04 | 9,47E-03 | -0,73 | 0,60 |
| ENSG00000008853 | RHOBTB2    | 2,27E-04 | 9,47E-03 | -0,27 | 0,83 |
| ENSG00000106105 | GARS       | 2,31E-04 | 9,60E-03 | 0,32  | 1,25 |
| ENSG00000112210 | RAB23      | 2,30E-04 | 9,60E-03 | 0,33  | 1,25 |
| ENSG00000171791 | BCL2       | 2,32E-04 | 9,60E-03 | -0,34 | 0,79 |
| ENSG00000272333 | KMT2B      | 2,32E-04 | 9,60E-03 | -0,30 | 0,81 |
| ENSG00000140416 | TPM1       | 2,33E-04 | 9,60E-03 | 0,28  | 1,22 |
| ENSG00000237550 | RPL9P9     | 2,38E-04 | 9,79E-03 | 0,19  | 1,14 |
| ENSG00000100979 | PLTP       | 2,38E-04 | 9,79E-03 | 0,47  | 1,38 |
| ENSG00000181163 | NPM1       | 2,39E-04 | 9,80E-03 | 0,24  | 1,18 |
| ENSG00000035141 | FAM136A    | 2,40E-04 | 9,81E-03 | 0,27  | 1,20 |
| ENSG00000172339 | ALG14      | 2,42E-04 | 9,84E-03 | 0,29  | 1,22 |
| ENSG00000148926 | ADM        | 2,43E-04 | 9,87E-03 | -0,46 | 0,73 |
| ENSG00000006047 | YBX2       | 2,44E-04 | 9,88E-03 | -0,68 | 0,62 |
| ENSG00000157657 | ZNF618     | 2,44E-04 | 9,88E-03 | -0,27 | 0,83 |
| ENSG00000168772 | CXXC4      | 2,53E-04 | 1,01E-02 | -0,51 | 0,70 |
| ENSG00000198888 | MT-ND1     | 2,53E-04 | 1,01E-02 | -0,46 | 0,73 |
| ENSG00000167173 | C15orf39   | 2,52E-04 | 1,01E-02 | -0,33 | 0,79 |
| ENSG00000270640 | AC104695.4 | 2,54E-04 | 1,02E-02 | -0,75 | 0,60 |
| ENSG00000114999 | TTL        | 2,54E-04 | 1,02E-02 | 0,22  | 1,16 |



|                 |            |          |          |       |      |
|-----------------|------------|----------|----------|-------|------|
| ENSG00000136205 | TNS3       | 2,56E-04 | 1,02E-02 | -0,24 | 0,84 |
| ENSG00000147604 | RPL7       | 2,56E-04 | 1,02E-02 | 0,21  | 1,16 |
| ENSG00000188060 | RAB42      | 2,58E-04 | 1,02E-02 | 0,38  | 1,31 |
| ENSG00000183527 | PSMG1      | 2,59E-04 | 1,02E-02 | 0,30  | 1,23 |
| ENSG00000125257 | ABCC4      | 2,61E-04 | 1,03E-02 | 0,42  | 1,34 |
| ENSG00000062524 | LTK        | 2,62E-04 | 1,03E-02 | 0,76  | 1,69 |
| ENSG00000139329 | LUM        | 2,63E-04 | 1,03E-02 | 0,79  | 1,73 |
| ENSG00000170801 | HTRA3      | 2,64E-04 | 1,03E-02 | 0,72  | 1,65 |
| ENSG00000126368 | NR1D1      | 2,66E-04 | 1,03E-02 | -0,64 | 0,64 |
| ENSG00000185551 | NR2F2      | 2,66E-04 | 1,03E-02 | -0,37 | 0,78 |
| ENSG00000137509 | PRCP       | 2,66E-04 | 1,03E-02 | 0,19  | 1,14 |
| ENSG00000005194 | CIAPIN1    | 2,68E-04 | 1,04E-02 | 0,22  | 1,17 |
| ENSG00000074696 | HACD3      | 2,69E-04 | 1,04E-02 | 0,29  | 1,22 |
| ENSG00000172986 | GXYLT2     | 2,68E-04 | 1,04E-02 | 0,59  | 1,50 |
| ENSG00000111530 | CAND1      | 2,70E-04 | 1,04E-02 | 0,14  | 1,10 |
| ENSG00000163527 | STT3B      | 2,72E-04 | 1,04E-02 | 0,22  | 1,16 |
| ENSG00000232346 | Z74021.1   | 2,72E-04 | 1,04E-02 | 0,24  | 1,18 |
| ENSG00000213923 | CSNK1E     | 2,73E-04 | 1,04E-02 | -0,19 | 0,88 |
| ENSG00000130402 | ACTN4      | 2,75E-04 | 1,05E-02 | -0,25 | 0,84 |
| ENSG00000168243 | GNG4       | 2,80E-04 | 1,06E-02 | 0,91  | 1,88 |
| ENSG00000153064 | BANK1      | 2,82E-04 | 1,07E-02 | -0,58 | 0,67 |
| ENSG00000019144 | PHLDB1     | 2,85E-04 | 1,07E-02 | -0,36 | 0,78 |
| ENSG00000113712 | CSNK1A1    | 2,85E-04 | 1,07E-02 | 0,12  | 1,09 |
| ENSG00000129951 | PLPPR3     | 2,85E-04 | 1,07E-02 | 1,09  | 2,13 |
| ENSG00000126458 | RRAS       | 2,86E-04 | 1,07E-02 | -0,36 | 0,78 |
| ENSG00000099864 | PALM       | 2,87E-04 | 1,08E-02 | -0,60 | 0,66 |
| ENSG00000156650 | KAT6B      | 2,89E-04 | 1,08E-02 | -0,19 | 0,87 |
| ENSG00000186350 | RXRA       | 2,91E-04 | 1,08E-02 | -0,27 | 0,83 |
| ENSG00000131507 | NDFIP1     | 2,93E-04 | 1,09E-02 | 0,16  | 1,12 |
| ENSG00000155096 | AZIN1      | 2,93E-04 | 1,09E-02 | 0,18  | 1,14 |
| ENSG00000140264 | SERF2      | 2,94E-04 | 1,09E-02 | 0,22  | 1,16 |
| ENSG00000164736 | SOX17      | 2,97E-04 | 1,09E-02 | -0,44 | 0,74 |
| ENSG00000070778 | AL162171.1 | 2,97E-04 | 1,09E-02 | -0,30 | 0,81 |
| ENSG00000163823 | CCR1       | 2,97E-04 | 1,09E-02 | 0,48  | 1,40 |
| ENSG00000132840 | BHMT2      | 3,01E-04 | 1,10E-02 | -0,69 | 0,62 |
| ENSG00000079308 | TNS1       | 3,05E-04 | 1,10E-02 | -0,65 | 0,64 |
| ENSG00000163083 | INHBB      | 3,03E-04 | 1,10E-02 | -0,64 | 0,64 |
| ENSG00000185022 | MAFF       | 3,05E-04 | 1,10E-02 | -0,55 | 0,68 |
| ENSG00000264364 | DYNLL2     | 3,05E-04 | 1,10E-02 | -0,21 | 0,86 |
| ENSG00000136628 | EPRS       | 3,06E-04 | 1,10E-02 | 0,20  | 1,15 |
| ENSG00000100219 | XBP1       | 3,03E-04 | 1,10E-02 | 0,26  | 1,20 |
| ENSG00000184254 | ALDH1A3    | 3,04E-04 | 1,10E-02 | 0,47  | 1,39 |
| ENSG00000182220 | ATP6AP2    | 3,10E-04 | 1,11E-02 | 0,22  | 1,16 |
| ENSG00000265354 | TIMM23     | 3,09E-04 | 1,11E-02 | 0,23  | 1,18 |
| ENSG00000177685 | CRACR2B    | 3,16E-04 | 1,13E-02 | -0,41 | 0,75 |
| ENSG00000114446 | IFT57      | 3,17E-04 | 1,14E-02 | 0,19  | 1,14 |
| ENSG00000110693 | SOX6       | 3,21E-04 | 1,14E-02 | -0,36 | 0,78 |
| ENSG00000184384 | MAML2      | 3,23E-04 | 1,14E-02 | -0,22 | 0,86 |
| ENSG00000103404 | USP31      | 3,21E-04 | 1,14E-02 | 0,14  | 1,10 |
| ENSG00000143106 | PSMA5      | 3,20E-04 | 1,14E-02 | 0,22  | 1,16 |

|                 |            |          |          |       |      |
|-----------------|------------|----------|----------|-------|------|
| ENSG00000143222 | UFC1       | 3,22E-04 | 1,14E-02 | 0,24  | 1,18 |
| ENSG00000090530 | P3H2       | 3,19E-04 | 1,14E-02 | 0,46  | 1,37 |
| ENSG00000078098 | FAP        | 3,21E-04 | 1,14E-02 | 1,03  | 2,05 |
| ENSG00000198729 | PPP1R14C   | 3,25E-04 | 1,14E-02 | 1,13  | 2,19 |
| ENSG00000184113 | CLDN5      | 3,31E-04 | 1,15E-02 | -0,55 | 0,68 |
| ENSG00000177045 | SIX5       | 3,30E-04 | 1,15E-02 | -0,35 | 0,79 |
| ENSG00000118292 | C1orf54    | 3,31E-04 | 1,15E-02 | 0,48  | 1,40 |
| ENSG00000133619 | KRBA1      | 3,33E-04 | 1,16E-02 | -0,27 | 0,83 |
| ENSG00000139372 | TDG        | 3,33E-04 | 1,16E-02 | 0,29  | 1,22 |
| ENSG00000168824 | NSG1       | 3,36E-04 | 1,17E-02 | 1,15  | 2,22 |
| ENSG00000270547 | LINC01235  | 3,39E-04 | 1,17E-02 | -1,20 | 0,44 |
| ENSG00000189159 | JPT1       | 3,38E-04 | 1,17E-02 | 0,33  | 1,26 |
| ENSG00000151276 | MAGI1      | 3,42E-04 | 1,18E-02 | -0,27 | 0,83 |
| ENSG00000117410 | ATP6VOB    | 3,43E-04 | 1,18E-02 | 0,33  | 1,26 |
| ENSG00000173269 | MMRN2      | 3,46E-04 | 1,19E-02 | -0,30 | 0,81 |
| ENSG00000197879 | MYO1C      | 3,50E-04 | 1,20E-02 | -0,42 | 0,75 |
| ENSG00000127533 | F2RL3      | 3,51E-04 | 1,20E-02 | -0,42 | 0,75 |
| ENSG00000132478 | UNK        | 3,52E-04 | 1,20E-02 | -0,17 | 0,89 |
| ENSG00000143621 | ILF2       | 3,52E-04 | 1,20E-02 | 0,16  | 1,12 |
| ENSG00000158315 | RHBDL2     | 3,55E-04 | 1,20E-02 | 0,82  | 1,77 |
| ENSG00000142892 | PIGK       | 3,56E-04 | 1,20E-02 | 0,27  | 1,21 |
| ENSG00000174951 | FUT1       | 3,57E-04 | 1,21E-02 | -0,41 | 0,75 |
| ENSG00000076108 | BAZ2A      | 3,60E-04 | 1,22E-02 | -0,26 | 0,84 |
| ENSG00000198198 | SZT2       | 3,61E-04 | 1,22E-02 | -0,20 | 0,87 |
| ENSG00000166130 | IKBIP      | 3,64E-04 | 1,22E-02 | 0,33  | 1,26 |
| ENSG00000257337 | AC068888.1 | 3,68E-04 | 1,23E-02 | -0,40 | 0,76 |
| ENSG00000232472 | EEF1B2P3   | 3,68E-04 | 1,23E-02 | 0,22  | 1,16 |
| ENSG00000242732 | RTL5       | 3,72E-04 | 1,24E-02 | -0,36 | 0,78 |
| ENSG00000143196 | DPT        | 3,73E-04 | 1,24E-02 | 0,63  | 1,54 |
| ENSG00000166783 | MARF1      | 3,75E-04 | 1,25E-02 | -0,22 | 0,86 |
| ENSG00000058453 | CROCC      | 3,77E-04 | 1,25E-02 | -0,22 | 0,86 |
| ENSG00000015475 | BID        | 3,79E-04 | 1,25E-02 | 0,32  | 1,25 |
| ENSG00000033170 | FUT8       | 3,80E-04 | 1,26E-02 | 0,23  | 1,17 |
| ENSG00000114541 | FRMD4B     | 3,82E-04 | 1,26E-02 | 0,18  | 1,14 |
| ENSG00000130294 | KIF1A      | 3,85E-04 | 1,27E-02 | -2,02 | 0,25 |
| ENSG00000107282 | APBA1      | 3,86E-04 | 1,27E-02 | -0,28 | 0,82 |
| ENSG00000211892 | IGHG4      | 3,86E-04 | 1,27E-02 | 0,91  | 1,88 |
| ENSG00000124429 | POF1B      | 3,87E-04 | 1,27E-02 | -0,80 | 0,58 |
| ENSG00000102317 | RBM3       | 3,89E-04 | 1,27E-02 | 0,15  | 1,11 |
| ENSG00000095777 | MYO3A      | 3,89E-04 | 1,27E-02 | 1,29  | 2,44 |
| ENSG00000147862 | NFIB       | 3,91E-04 | 1,27E-02 | -0,35 | 0,78 |
| ENSG00000043591 | ADRB1      | 3,93E-04 | 1,27E-02 | -1,11 | 0,46 |
| ENSG00000143320 | CRABP2     | 3,92E-04 | 1,27E-02 | 0,72  | 1,65 |
| ENSG00000230148 | HOXB-AS1   | 3,93E-04 | 1,27E-02 | 1,00  | 2,00 |
| ENSG00000145050 | MANF       | 3,96E-04 | 1,27E-02 | 0,40  | 1,32 |
| ENSG00000218350 | LYPLA1P3   | 3,96E-04 | 1,27E-02 | 0,47  | 1,38 |
| ENSG00000173482 | PTPRM      | 3,98E-04 | 1,28E-02 | -0,22 | 0,86 |
| ENSG00000102606 | ARHGEF7    | 4,02E-04 | 1,29E-02 | -0,18 | 0,88 |
| ENSG00000090905 | TNRC6A     | 4,03E-04 | 1,29E-02 | -0,16 | 0,89 |
| ENSG00000260077 | AC104794.2 | 4,07E-04 | 1,29E-02 | -0,46 | 0,73 |

|                  |            |          |          |       |      |
|------------------|------------|----------|----------|-------|------|
| ENSG00000107719  | PALD1      | 4,07E-04 | 1,29E-02 | -0,31 | 0,80 |
| ENSG00000279117  | AP001972.5 | 4,06E-04 | 1,29E-02 | -0,27 | 0,83 |
| ENSG00000225159  | NPM1P39    | 4,06E-04 | 1,29E-02 | 0,26  | 1,20 |
| ENSG00000114315  | HES1       | 4,10E-04 | 1,30E-02 | -0,41 | 0,75 |
| ENSG00000240694  | PNMA2      | 4,10E-04 | 1,30E-02 | 0,49  | 1,40 |
| ENSG00000200959  | SNORA74A   | 4,16E-04 | 1,31E-02 | 0,55  | 1,46 |
| ENSG00000005882  | PDK2       | 4,17E-04 | 1,31E-02 | -0,28 | 0,82 |
| ENSG00000124177  | CHD6       | 4,26E-04 | 1,34E-02 | -0,15 | 0,90 |
| ENSG00000143126  | CELSR2     | 4,30E-04 | 1,35E-02 | -0,35 | 0,79 |
| ENSG00000100554  | ATP6V1D    | 4,30E-04 | 1,35E-02 | 0,29  | 1,22 |
| ENSG00000180879  | SSR4       | 4,32E-04 | 1,35E-02 | 0,28  | 1,22 |
| ENSG00000118058  | KMT2A      | 4,33E-04 | 1,35E-02 | -0,23 | 0,86 |
| ENSG00000127511  | SIN3B      | 4,36E-04 | 1,35E-02 | -0,21 | 0,87 |
| ENSG00000183826  | BTBD9      | 4,35E-04 | 1,35E-02 | -0,20 | 0,87 |
| ENSG00000263266  | RPS7P1     | 4,35E-04 | 1,35E-02 | 0,19  | 1,14 |
| ENSG00000104408  | EIF3E      | 4,36E-04 | 1,35E-02 | 0,21  | 1,16 |
| ENSG00000158683  | PKD1L1     | 4,39E-04 | 1,35E-02 | -0,46 | 0,73 |
| ENSG00000163913  | IFT122     | 4,41E-04 | 1,36E-02 | -0,26 | 0,84 |
| ENSG00000182326  | C1S        | 4,45E-04 | 1,37E-02 | 0,36  | 1,29 |
| ENSG00000090238  | YPEL3      | 4,47E-04 | 1,37E-02 | -0,20 | 0,87 |
| ENSG00000142910  | TINAGL1    | 4,50E-04 | 1,38E-02 | -0,42 | 0,75 |
| ENSG00000198618  | PPIAP22    | 4,57E-04 | 1,40E-02 | 0,19  | 1,14 |
| ENSG00000102158  | MAGT1      | 4,63E-04 | 1,40E-02 | 0,17  | 1,12 |
| ENSG00000113407  | TARS       | 4,60E-04 | 1,40E-02 | 0,22  | 1,17 |
| ENSG00000156374  | PCGF6      | 4,62E-04 | 1,40E-02 | 0,29  | 1,22 |
| ENSG00000198406  | BZW1P2     | 4,62E-04 | 1,40E-02 | 0,35  | 1,27 |
| ENSG00000152661  | GJA1       | 4,61E-04 | 1,40E-02 | 0,56  | 1,47 |
| ENSG00000165171  | METTL27    | 4,65E-04 | 1,40E-02 | -0,62 | 0,65 |
| ENSG00000005339  | CREBBP     | 4,70E-04 | 1,41E-02 | -0,28 | 0,82 |
| ENSG00000141367  | CLTC       | 4,69E-04 | 1,41E-02 | 0,14  | 1,10 |
| ENSG00000154856  | APCDD1     | 4,70E-04 | 1,41E-02 | 0,42  | 1,33 |
| ENSG00000143158  | MPC2       | 4,72E-04 | 1,41E-02 | 0,20  | 1,15 |
| ENSG00000118705  | RPN2       | 4,72E-04 | 1,41E-02 | 0,20  | 1,15 |
| ENSG00000259347  | AC087482.1 | 4,78E-04 | 1,42E-02 | -0,92 | 0,53 |
| ENSG00000100242  | SUN2       | 4,76E-04 | 1,42E-02 | -0,25 | 0,84 |
| ENSG00000112584  | FAM120B    | 4,78E-04 | 1,42E-02 | -0,19 | 0,88 |
| ENSG00000220842  | RPL21P16   | 4,78E-04 | 1,42E-02 | 0,29  | 1,22 |
| ENSG00000169057  | MECP2      | 4,91E-04 | 1,45E-02 | -0,22 | 0,86 |
| ENSG00000108829  | LRRC59     | 4,90E-04 | 1,45E-02 | 0,37  | 1,29 |
| ENSG00000166441  | RPL27A     | 4,93E-04 | 1,46E-02 | 0,17  | 1,12 |
| ENSG00000148248  | SURF4      | 4,94E-04 | 1,46E-02 | 0,23  | 1,18 |
| ENSG00000137285  | TUBB2B     | 4,96E-04 | 1,46E-02 | -0,55 | 0,68 |
| ENSG000000053747 | LAMA3      | 4,96E-04 | 1,46E-02 | -0,48 | 0,72 |
| ENSG00000239521  | CASTOR3    | 4,99E-04 | 1,46E-02 | -0,29 | 0,82 |
| ENSG00000135905  | DOCK10     | 5,01E-04 | 1,46E-02 | 0,38  | 1,30 |
| ENSG00000104946  | TBC1D17    | 5,05E-04 | 1,47E-02 | -0,29 | 0,82 |
| ENSG00000148384  | INPP5E     | 5,03E-04 | 1,47E-02 | -0,25 | 0,84 |
| ENSG00000131100  | ATP6V1E1   | 5,03E-04 | 1,47E-02 | 0,23  | 1,17 |
| ENSG00000211950  | IGHV1-24   | 5,04E-04 | 1,47E-02 | 0,86  | 1,82 |
| ENSG00000198910  | L1CAM      | 5,11E-04 | 1,47E-02 | -0,83 | 0,56 |

|                 |            |          |          |       |      |
|-----------------|------------|----------|----------|-------|------|
| ENSG00000106617 | PRKAG2     | 5,10E-04 | 1,47E-02 | -0,28 | 0,82 |
| ENSG00000138623 | SEMA7A     | 5,11E-04 | 1,47E-02 | 0,42  | 1,34 |
| ENSG00000131480 | AOC2       | 5,11E-04 | 1,47E-02 | 0,46  | 1,38 |
| ENSG00000145016 | RUBCN      | 5,16E-04 | 1,48E-02 | -0,18 | 0,88 |
| ENSG00000153214 | TMEM87B    | 5,15E-04 | 1,48E-02 | 0,19  | 1,14 |
| ENSG00000049860 | HEXB       | 5,15E-04 | 1,48E-02 | 0,27  | 1,21 |
| ENSG00000197614 | MFAP5      | 5,28E-04 | 1,49E-02 | -0,92 | 0,53 |
| ENSG00000182253 | SYNM       | 5,27E-04 | 1,49E-02 | -0,41 | 0,75 |
| ENSG00000134030 | CTIF       | 5,28E-04 | 1,49E-02 | -0,34 | 0,79 |
| ENSG00000107140 | TESK1      | 5,29E-04 | 1,49E-02 | -0,24 | 0,85 |
| ENSG00000163050 | COQ8A      | 5,30E-04 | 1,49E-02 | -0,21 | 0,87 |
| ENSG00000196428 | TSC22D2    | 5,28E-04 | 1,49E-02 | -0,19 | 0,87 |
| ENSG00000109111 | SUPT6H     | 5,22E-04 | 1,49E-02 | -0,16 | 0,90 |
| ENSG00000174444 | RPL4       | 5,26E-04 | 1,49E-02 | 0,15  | 1,11 |
| ENSG00000112078 | KCTD20     | 5,27E-04 | 1,49E-02 | 0,15  | 1,11 |
| ENSG00000137038 | DMAC1      | 5,28E-04 | 1,49E-02 | 0,22  | 1,16 |
| ENSG00000091127 | PUS7       | 5,20E-04 | 1,49E-02 | 0,26  | 1,19 |
| ENSG00000119888 | EPCAM      | 5,23E-04 | 1,49E-02 | 0,47  | 1,39 |
| ENSG00000185453 | ZSWIM9     | 5,31E-04 | 1,49E-02 | -0,57 | 0,67 |
| ENSG00000173660 | UQCRH      | 5,32E-04 | 1,49E-02 | 0,23  | 1,17 |
| ENSG00000144649 | GASK1A     | 5,33E-04 | 1,49E-02 | 0,57  | 1,48 |
| ENSG00000123562 | MORF4L2    | 5,36E-04 | 1,49E-02 | 0,22  | 1,16 |
| ENSG00000129757 | CDKN1C     | 5,38E-04 | 1,50E-02 | -0,44 | 0,74 |
| ENSG00000157680 | DGKI       | 5,42E-04 | 1,50E-02 | 0,53  | 1,44 |
| ENSG00000197958 | RPL12      | 5,44E-04 | 1,51E-02 | 0,17  | 1,12 |
| ENSG00000168374 | ARF4       | 5,44E-04 | 1,51E-02 | 0,26  | 1,20 |
| ENSG00000135119 | RNFT2      | 5,52E-04 | 1,51E-02 | -0,58 | 0,67 |
| ENSG00000105287 | PRKD2      | 5,51E-04 | 1,51E-02 | -0,28 | 0,82 |
| ENSG00000044446 | PHKA2      | 5,50E-04 | 1,51E-02 | -0,18 | 0,88 |
| ENSG00000088930 | XRN2       | 5,52E-04 | 1,51E-02 | 0,16  | 1,12 |
| ENSG00000182899 | RPL35A     | 5,51E-04 | 1,51E-02 | 0,18  | 1,14 |
| ENSG00000112079 | STK38      | 5,53E-04 | 1,51E-02 | 0,21  | 1,16 |
| ENSG00000134198 | TSPAN2     | 5,52E-04 | 1,51E-02 | 0,72  | 1,64 |
| ENSG00000163430 | FSTL1      | 5,55E-04 | 1,52E-02 | 0,38  | 1,30 |
| ENSG00000170855 | TRIAP1     | 5,59E-04 | 1,52E-02 | 0,26  | 1,20 |
| ENSG00000163938 | GNL3       | 5,62E-04 | 1,53E-02 | 0,28  | 1,21 |
| ENSG00000104973 | MED25      | 5,65E-04 | 1,53E-02 | -0,25 | 0,84 |
| ENSG00000164463 | CREBRF     | 5,66E-04 | 1,53E-02 | -0,21 | 0,86 |
| ENSG00000104375 | STK3       | 5,66E-04 | 1,53E-02 | 0,18  | 1,13 |
| ENSG00000186377 | CYP4X1     | 5,72E-04 | 1,54E-02 | -0,61 | 0,66 |
| ENSG00000198242 | RPL23A     | 5,71E-04 | 1,54E-02 | 0,17  | 1,12 |
| ENSG00000263155 | MYZAP      | 5,76E-04 | 1,55E-02 | -0,73 | 0,60 |
| ENSG00000109906 | ZBTB16     | 5,78E-04 | 1,55E-02 | -0,56 | 0,68 |
| ENSG00000179094 | AC129492.1 | 5,78E-04 | 1,55E-02 | -0,42 | 0,75 |
| ENSG00000163501 | IHH        | 5,81E-04 | 1,56E-02 | -0,79 | 0,58 |
| ENSG00000068912 | ERLEC1     | 5,84E-04 | 1,56E-02 | 0,23  | 1,18 |
| ENSG00000138741 | TRPC3      | 5,84E-04 | 1,56E-02 | 0,48  | 1,40 |
| ENSG00000227008 | AL009174.1 | 5,86E-04 | 1,56E-02 | 0,22  | 1,16 |
| ENSG00000126106 | TMEM53     | 5,89E-04 | 1,57E-02 | -0,32 | 0,80 |
| ENSG00000166033 | HTRA1      | 5,90E-04 | 1,57E-02 | 0,79  | 1,73 |

|                 |            |          |          |       |      |
|-----------------|------------|----------|----------|-------|------|
| ENSG00000185950 | IRS2       | 5,96E-04 | 1,57E-02 | -0,60 | 0,66 |
| ENSG00000163701 | IL17RE     | 5,92E-04 | 1,57E-02 | -0,59 | 0,66 |
| ENSG00000241627 | UBQLN4P1   | 5,93E-04 | 1,57E-02 | -0,43 | 0,74 |
| ENSG00000151348 | EXT2       | 5,94E-04 | 1,57E-02 | 0,20  | 1,15 |
| ENSG00000143545 | RAB13      | 5,95E-04 | 1,57E-02 | 0,29  | 1,22 |
| ENSG00000013375 | PGM3       | 6,03E-04 | 1,59E-02 | 0,39  | 1,31 |
| ENSG00000151148 | UBE3B      | 6,04E-04 | 1,59E-02 | -0,15 | 0,90 |
| ENSG00000167972 | ABCA3      | 6,15E-04 | 1,61E-02 | -0,45 | 0,73 |
| ENSG00000139718 | SETD1B     | 6,13E-04 | 1,61E-02 | -0,33 | 0,80 |
| ENSG00000124782 | RREB1      | 6,14E-04 | 1,61E-02 | -0,19 | 0,88 |
| ENSG00000186468 | RPS23      | 6,18E-04 | 1,61E-02 | 0,17  | 1,12 |
| ENSG00000188001 | TPRG1      | 6,21E-04 | 1,61E-02 | -0,35 | 0,78 |
| ENSG00000203485 | INF2       | 6,21E-04 | 1,61E-02 | -0,26 | 0,83 |
| ENSG00000196782 | MAML3      | 6,26E-04 | 1,62E-02 | -0,27 | 0,83 |
| ENSG00000171045 | TSNARE1    | 6,27E-04 | 1,62E-02 | -0,27 | 0,83 |
| ENSG00000168066 | SF1        | 6,28E-04 | 1,62E-02 | -0,19 | 0,88 |
| ENSG00000138768 | USO1       | 6,27E-04 | 1,62E-02 | 0,20  | 1,15 |
| ENSG00000113555 | PCDH12     | 6,31E-04 | 1,62E-02 | -0,33 | 0,79 |
| ENSG00000213523 | SRA1       | 6,30E-04 | 1,62E-02 | 0,22  | 1,16 |
| ENSG00000171798 | KNDC1      | 6,33E-04 | 1,63E-02 | -0,67 | 0,63 |
| ENSG00000163590 | PPM1L      | 6,37E-04 | 1,63E-02 | -0,33 | 0,79 |
| ENSG00000175155 | YPEL2      | 6,37E-04 | 1,63E-02 | -0,19 | 0,87 |
| ENSG00000145088 | EAF2       | 6,36E-04 | 1,63E-02 | 0,40  | 1,32 |
| ENSG00000148344 | PTGES      | 6,35E-04 | 1,63E-02 | 0,72  | 1,64 |
| ENSG00000198034 | RPS4X      | 6,39E-04 | 1,63E-02 | 0,14  | 1,11 |
| ENSG00000250138 | AC139495.3 | 6,42E-04 | 1,63E-02 | -0,50 | 0,71 |
| ENSG00000146834 | MEPCE      | 6,41E-04 | 1,63E-02 | -0,25 | 0,84 |
| ENSG00000197102 | DYNC1H1    | 6,43E-04 | 1,63E-02 | -0,17 | 0,89 |
| ENSG00000156411 | ATP5MPL    | 6,44E-04 | 1,63E-02 | 0,23  | 1,17 |
| ENSG00000178752 | ERFE       | 6,43E-04 | 1,63E-02 | 0,90  | 1,87 |
| ENSG00000237668 | RPS15AP38  | 6,46E-04 | 1,63E-02 | 0,25  | 1,19 |
| ENSG00000133106 | EPSTI1     | 6,48E-04 | 1,63E-02 | 0,33  | 1,25 |
| ENSG00000188549 | CCDC9B     | 6,58E-04 | 1,65E-02 | -0,30 | 0,81 |
| ENSG00000169302 | STK32A     | 6,61E-04 | 1,66E-02 | -0,40 | 0,76 |
| ENSG00000108306 | FBXL20     | 6,62E-04 | 1,66E-02 | -0,16 | 0,90 |
| ENSG00000078902 | TOLLIP     | 6,65E-04 | 1,67E-02 | -0,23 | 0,85 |
| ENSG00000137727 | ARHGAP20   | 6,67E-04 | 1,67E-02 | -0,59 | 0,67 |
| ENSG00000050165 | DKK3       | 6,67E-04 | 1,67E-02 | 0,60  | 1,51 |
| ENSG00000165810 | BTNL9      | 6,69E-04 | 1,67E-02 | -0,45 | 0,73 |
| ENSG00000244716 | BX679664.3 | 6,72E-04 | 1,67E-02 | 0,23  | 1,17 |
| ENSG00000198933 | TBKBP1     | 6,74E-04 | 1,67E-02 | -0,27 | 0,83 |
| ENSG00000136770 | DNAJC1     | 6,74E-04 | 1,67E-02 | 0,21  | 1,16 |
| ENSG00000079313 | REXO1      | 6,77E-04 | 1,68E-02 | -0,27 | 0,83 |
| ENSG00000058262 | SEC61A1    | 6,82E-04 | 1,68E-02 | 0,25  | 1,19 |
| ENSG00000171502 | COL24A1    | 6,82E-04 | 1,68E-02 | 0,60  | 1,51 |
| ENSG00000278768 | BACE1-AS   | 6,86E-04 | 1,69E-02 | -0,47 | 0,72 |
| ENSG00000090006 | LTBP4      | 6,88E-04 | 1,69E-02 | -0,49 | 0,71 |
| ENSG00000109323 | MANBA      | 6,95E-04 | 1,71E-02 | 0,18  | 1,14 |
| ENSG00000100065 | CARD10     | 6,98E-04 | 1,71E-02 | -0,37 | 0,77 |
| ENSG00000141469 | SLC14A1    | 7,00E-04 | 1,71E-02 | -0,92 | 0,53 |

|                 |            |          |          |       |      |
|-----------------|------------|----------|----------|-------|------|
| ENSG00000132581 | SDF2       | 7,01E-04 | 1,71E-02 | 0,20  | 1,15 |
| ENSG00000075651 | PLD1       | 7,03E-04 | 1,72E-02 | 0,20  | 1,15 |
| ENSG00000277791 | PSMB3      | 7,04E-04 | 1,72E-02 | 0,18  | 1,13 |
| ENSG00000137154 | RPS6       | 7,07E-04 | 1,72E-02 | 0,14  | 1,10 |
| ENSG00000235552 | RPL6P27    | 7,07E-04 | 1,72E-02 | 0,17  | 1,13 |
| ENSG00000198018 | ENTPD7     | 7,12E-04 | 1,73E-02 | 0,43  | 1,35 |
| ENSG00000125977 | EIF2S2     | 7,15E-04 | 1,73E-02 | 0,18  | 1,13 |
| ENSG00000120645 | IQSEC3     | 7,23E-04 | 1,74E-02 | -0,58 | 0,67 |
| ENSG00000162522 | KIAA1522   | 7,19E-04 | 1,74E-02 | -0,31 | 0,81 |
| ENSG00000149577 | SIDT2      | 7,22E-04 | 1,74E-02 | -0,23 | 0,85 |
| ENSG00000119013 | NDUFB3     | 7,22E-04 | 1,74E-02 | 0,28  | 1,21 |
| ENSG00000173457 | PPP1R14B   | 7,22E-04 | 1,74E-02 | 0,33  | 1,25 |
| ENSG00000145934 | TENM2      | 7,18E-04 | 1,74E-02 | 0,52  | 1,43 |
| ENSG00000227615 | AP001324.1 | 7,28E-04 | 1,74E-02 | 0,21  | 1,16 |
| ENSG00000113594 | LIFR       | 7,27E-04 | 1,74E-02 | 0,34  | 1,26 |
| ENSG00000168754 | FAM178B    | 7,30E-04 | 1,74E-02 | -0,65 | 0,64 |
| ENSG00000197006 | METTL9     | 7,30E-04 | 1,74E-02 | 0,15  | 1,11 |
| ENSG00000137941 | TTLL7      | 7,36E-04 | 1,75E-02 | -0,54 | 0,69 |
| ENSG00000001617 | SEMA3F     | 7,38E-04 | 1,76E-02 | -0,43 | 0,74 |
| ENSG00000249353 | NPM1P27    | 7,40E-04 | 1,76E-02 | 0,22  | 1,17 |
| ENSG00000160285 | LSS        | 7,41E-04 | 1,76E-02 | -0,26 | 0,83 |
| ENSG00000167978 | SRRM2      | 7,44E-04 | 1,76E-02 | -0,28 | 0,82 |
| ENSG00000172071 | EIF2AK3    | 7,44E-04 | 1,76E-02 | 0,20  | 1,15 |
| ENSG00000228672 | PROB1      | 7,53E-04 | 1,78E-02 | -0,43 | 0,74 |
| ENSG00000177150 | FAM210A    | 7,54E-04 | 1,78E-02 | 0,25  | 1,19 |
| ENSG00000112796 | ENPP5      | 7,57E-04 | 1,78E-02 | -0,47 | 0,72 |
| ENSG00000105538 | RASIP1     | 7,61E-04 | 1,79E-02 | -0,37 | 0,77 |
| ENSG00000184144 | CNTN2      | 7,65E-04 | 1,80E-02 | -0,75 | 0,59 |
| ENSG00000196218 | RYR1       | 7,66E-04 | 1,80E-02 | -0,42 | 0,75 |
| ENSG00000065882 | TBC1D1     | 7,69E-04 | 1,80E-02 | -0,17 | 0,89 |
| ENSG00000164236 | ANKRD33B   | 7,77E-04 | 1,82E-02 | -0,82 | 0,57 |
| ENSG00000150471 | ADGRL3     | 7,89E-04 | 1,82E-02 | -0,62 | 0,65 |
| ENSG00000074416 | MGLL       | 7,86E-04 | 1,82E-02 | -0,49 | 0,71 |
| ENSG00000185561 | TLCD2      | 7,90E-04 | 1,82E-02 | -0,42 | 0,75 |
| ENSG00000137103 | TMEM8B     | 7,89E-04 | 1,82E-02 | -0,40 | 0,76 |
| ENSG00000099308 | MAST3      | 7,86E-04 | 1,82E-02 | -0,31 | 0,81 |
| ENSG00000204569 | PPP1R10    | 7,85E-04 | 1,82E-02 | -0,15 | 0,90 |
| ENSG00000172586 | CHCHD1     | 7,89E-04 | 1,82E-02 | 0,27  | 1,21 |
| ENSG00000149485 | FADS1      | 7,86E-04 | 1,82E-02 | 0,31  | 1,24 |
| ENSG00000163584 | RPL22L1    | 7,81E-04 | 1,82E-02 | 0,33  | 1,25 |
| ENSG00000144895 | EIF2A      | 7,92E-04 | 1,82E-02 | 0,15  | 1,11 |
| ENSG00000083168 | KAT6A      | 7,99E-04 | 1,84E-02 | -0,16 | 0,89 |
| ENSG00000121005 | CRISPLD1   | 8,06E-04 | 1,84E-02 | -0,96 | 0,51 |
| ENSG00000272070 | AC005618.1 | 8,02E-04 | 1,84E-02 | -0,55 | 0,68 |
| ENSG00000106211 | HSPB1      | 8,06E-04 | 1,84E-02 | -0,41 | 0,75 |
| ENSG00000122592 | HOXA7      | 8,11E-04 | 1,84E-02 | -0,36 | 0,78 |
| ENSG00000079332 | SAR1A      | 8,11E-04 | 1,84E-02 | 0,13  | 1,10 |
| ENSG00000159322 | ADPGK      | 8,12E-04 | 1,84E-02 | 0,16  | 1,12 |
| ENSG00000165732 | DDX21      | 8,06E-04 | 1,84E-02 | 0,19  | 1,14 |
| ENSG00000143870 | PDIA6      | 8,06E-04 | 1,84E-02 | 0,21  | 1,16 |

|                 |            |          |          |       |      |
|-----------------|------------|----------|----------|-------|------|
| ENSG00000109861 | CTSC       | 8,13E-04 | 1,84E-02 | 0,27  | 1,20 |
| ENSG00000138028 | CGREF1     | 8,08E-04 | 1,84E-02 | 0,59  | 1,51 |
| ENSG00000215183 | MSMP       | 8,11E-04 | 1,84E-02 | 1,88  | 3,68 |
| ENSG00000198874 | TYW1       | 8,20E-04 | 1,85E-02 | 0,20  | 1,15 |
| ENSG00000090520 | DNAJB11    | 8,24E-04 | 1,86E-02 | 0,22  | 1,16 |
| ENSG00000129473 | BCL2L2     | 8,26E-04 | 1,86E-02 | -0,23 | 0,85 |
| ENSG00000173267 | SNCG       | 8,35E-04 | 1,87E-02 | -0,70 | 0,62 |
| ENSG00000228486 | C2orf92    | 8,38E-04 | 1,87E-02 | -0,43 | 0,74 |
| ENSG00000196498 | NCOR2      | 8,36E-04 | 1,87E-02 | -0,33 | 0,79 |
| ENSG00000134815 | DHX34      | 8,34E-04 | 1,87E-02 | -0,20 | 0,87 |
| ENSG00000169567 | HINT1      | 8,38E-04 | 1,87E-02 | 0,17  | 1,13 |
| ENSG00000272398 | CD24       | 8,38E-04 | 1,87E-02 | 0,51  | 1,42 |
| ENSG00000141664 | ZCCHC2     | 8,48E-04 | 1,89E-02 | -0,18 | 0,88 |
| ENSG00000236830 | CBR3-AS1   | 8,52E-04 | 1,90E-02 | -0,38 | 0,77 |
| ENSG00000079482 | OPHN1      | 8,51E-04 | 1,90E-02 | -0,24 | 0,85 |
| ENSG00000114019 | AMOTL2     | 8,56E-04 | 1,90E-02 | -0,39 | 0,76 |
| ENSG00000196557 | CACNA1H    | 8,63E-04 | 1,91E-02 | -0,52 | 0,70 |
| ENSG00000158555 | GDPD5      | 8,63E-04 | 1,91E-02 | -0,30 | 0,81 |
| ENSG00000169291 | SHE        | 8,61E-04 | 1,91E-02 | -0,27 | 0,83 |
| ENSG00000156471 | PTDSS1     | 8,63E-04 | 1,91E-02 | 0,15  | 1,11 |
| ENSG00000242299 | AC073861.1 | 8,64E-04 | 1,91E-02 | 0,17  | 1,12 |
| ENSG00000107949 | BCCIP      | 8,66E-04 | 1,91E-02 | 0,19  | 1,14 |
| ENSG00000164919 | COX6C      | 8,66E-04 | 1,91E-02 | 0,19  | 1,14 |
| ENSG00000129353 | SLC44A2    | 8,73E-04 | 1,91E-02 | -0,24 | 0,85 |
| ENSG00000164715 | LMTK2      | 8,75E-04 | 1,91E-02 | -0,19 | 0,88 |
| ENSG00000114125 | RNF7       | 8,71E-04 | 1,91E-02 | 0,20  | 1,15 |
| ENSG00000107201 | DDX58      | 8,74E-04 | 1,91E-02 | 0,23  | 1,17 |
| ENSG00000141429 | GALNT1     | 8,75E-04 | 1,91E-02 | 0,31  | 1,24 |
| ENSG00000143061 | IGSF3      | 8,79E-04 | 1,92E-02 | 0,77  | 1,71 |
| ENSG00000183111 | ARHGEF37   | 8,82E-04 | 1,92E-02 | -0,38 | 0,77 |
| ENSG00000168309 | FAM107A    | 8,85E-04 | 1,93E-02 | -0,57 | 0,68 |
| ENSG00000139651 | ZNF740     | 8,86E-04 | 1,93E-02 | -0,16 | 0,90 |
| ENSG00000169021 | UQCRFS1    | 8,88E-04 | 1,93E-02 | 0,16  | 1,11 |
| ENSG00000157510 | AFAP1L1    | 8,90E-04 | 1,93E-02 | -0,32 | 0,80 |
| ENSG00000184381 | PLA2G6     | 8,94E-04 | 1,93E-02 | -0,31 | 0,80 |
| ENSG00000184271 | AC139768.1 | 8,93E-04 | 1,93E-02 | -0,27 | 0,83 |
| ENSG00000250251 | PKD1P6     | 8,95E-04 | 1,93E-02 | -0,24 | 0,85 |
| ENSG00000166794 | PPIB       | 8,99E-04 | 1,94E-02 | 0,27  | 1,21 |
| ENSG00000276644 | DACH1      | 9,07E-04 | 1,95E-02 | -0,38 | 0,77 |
| ENSG00000188738 | FSIP2      | 9,07E-04 | 1,95E-02 | 0,70  | 1,62 |
| ENSG00000064999 | ANKS1A     | 9,19E-04 | 1,97E-02 | -0,29 | 0,82 |
| ENSG00000165507 | DEPP1      | 9,24E-04 | 1,98E-02 | -0,57 | 0,67 |
| ENSG00000101445 | PPP1R16B   | 9,23E-04 | 1,98E-02 | -0,38 | 0,77 |
| ENSG00000077092 | RARB       | 9,24E-04 | 1,98E-02 | 0,34  | 1,26 |
| ENSG00000116147 | TNR        | 9,29E-04 | 1,98E-02 | -0,62 | 0,65 |
| ENSG00000148672 | GLUD1      | 9,29E-04 | 1,98E-02 | 0,13  | 1,10 |
| ENSG00000136827 | TOR1A      | 9,29E-04 | 1,98E-02 | 0,15  | 1,11 |
| ENSG00000117862 | TXNDC12    | 9,32E-04 | 1,98E-02 | 0,18  | 1,13 |
| ENSG00000102886 | GDPD3      | 9,41E-04 | 1,99E-02 | -0,42 | 0,75 |
| ENSG00000112294 | ALDH5A1    | 9,39E-04 | 1,99E-02 | -0,26 | 0,83 |

|                 |           |          |          |       |      |
|-----------------|-----------|----------|----------|-------|------|
| ENSG00000147202 | DIAPH2    | 9,40E-04 | 1,99E-02 | -0,22 | 0,86 |
| ENSG00000107021 | TBC1D13   | 9,38E-04 | 1,99E-02 | -0,19 | 0,88 |
| ENSG00000038382 | TRIO      | 9,43E-04 | 1,99E-02 | -0,12 | 0,92 |
| ENSG00000163468 | CCT3      | 9,42E-04 | 1,99E-02 | 0,21  | 1,16 |
| ENSG00000141084 | RANBP10   | 9,45E-04 | 1,99E-02 | -0,19 | 0,88 |
| ENSG00000277449 | CEBPB-AS1 | 9,52E-04 | 2,00E-02 | -0,43 | 0,74 |
| ENSG00000110108 | TMEM109   | 9,51E-04 | 2,00E-02 | -0,23 | 0,85 |
| ENSG00000136052 | SLC41A2   | 9,51E-04 | 2,00E-02 | 0,35  | 1,27 |
| ENSG00000163531 | NFASC     | 9,64E-04 | 2,00E-02 | -0,44 | 0,74 |
| ENSG00000054598 | FOXC1     | 9,64E-04 | 2,00E-02 | -0,29 | 0,82 |
| ENSG00000087274 | ADD1      | 9,61E-04 | 2,00E-02 | -0,14 | 0,91 |
| ENSG00000168282 | MGAT2     | 9,56E-04 | 2,00E-02 | 0,20  | 1,15 |
| ENSG00000196154 | S100A4    | 9,59E-04 | 2,00E-02 | 0,36  | 1,28 |
| ENSG00000176749 | CDK5R1    | 9,63E-04 | 2,00E-02 | 0,41  | 1,33 |
| ENSG00000185842 | DNAH14    | 9,62E-04 | 2,00E-02 | 0,54  | 1,45 |
| ENSG00000187634 | SAMD11    | 9,64E-04 | 2,00E-02 | 0,57  | 1,49 |
| ENSG00000081913 | PHLPP1    | 9,74E-04 | 2,01E-02 | -0,25 | 0,84 |
| ENSG00000099995 | SF3A1     | 9,74E-04 | 2,01E-02 | -0,19 | 0,88 |
| ENSG00000163466 | ARPC2     | 9,75E-04 | 2,01E-02 | 0,16  | 1,11 |
| ENSG00000116898 | MRPS15    | 9,75E-04 | 2,01E-02 | 0,21  | 1,16 |
| ENSG00000136522 | MRPL47    | 9,73E-04 | 2,01E-02 | 0,28  | 1,22 |
| ENSG00000154639 | CXADR     | 9,71E-04 | 2,01E-02 | 0,71  | 1,64 |
| ENSG00000111669 | TPI1      | 9,77E-04 | 2,01E-02 | 0,26  | 1,20 |
| ENSG00000108799 | EZH1      | 9,79E-04 | 2,01E-02 | -0,26 | 0,83 |
| ENSG00000263934 | SNORD3A   | 9,81E-04 | 2,01E-02 | 0,35  | 1,27 |
| ENSG00000185585 | OLFML2A   | 9,84E-04 | 2,01E-02 | -0,34 | 0,79 |
| ENSG00000047648 | ARHGAP6   | 9,84E-04 | 2,01E-02 | -0,31 | 0,81 |
| ENSG00000138326 | RPS24     | 9,85E-04 | 2,01E-02 | 0,16  | 1,11 |
| ENSG00000156466 | GDF6      | 9,88E-04 | 2,02E-02 | 1,88  | 3,67 |
| ENSG00000099282 | TSPAN15   | 9,93E-04 | 2,03E-02 | -0,47 | 0,72 |
| ENSG00000112144 | ICK       | 9,95E-04 | 2,03E-02 | -0,20 | 0,87 |
| ENSG00000204387 | C6orf48   | 9,98E-04 | 2,03E-02 | 0,16  | 1,12 |
| ENSG00000122359 | ANXA11    | 1,00E-03 | 2,03E-02 | -0,18 | 0,88 |
| ENSG00000129235 | TXNDC17   | 1,00E-03 | 2,03E-02 | 0,30  | 1,23 |
| ENSG00000072163 | LIMS2     | 1,01E-03 | 2,04E-02 | -0,34 | 0,79 |
| ENSG00000178385 | PLEKHM3   | 1,01E-03 | 2,04E-02 | -0,20 | 0,87 |
| ENSG00000122687 | MRM2      | 1,01E-03 | 2,04E-02 | 0,17  | 1,12 |
| ENSG00000230989 | HSBP1     | 1,01E-03 | 2,04E-02 | 0,25  | 1,19 |
| ENSG00000166557 | TMED3     | 1,01E-03 | 2,04E-02 | 0,47  | 1,38 |
| ENSG00000211973 | IGHV1-69  | 1,01E-03 | 2,04E-02 | 0,74  | 1,67 |
| ENSG00000141564 | RPTOR     | 1,02E-03 | 2,04E-02 | -0,20 | 0,87 |
| ENSG00000165801 | ARHGEF40  | 1,02E-03 | 2,04E-02 | -0,24 | 0,85 |
| ENSG00000182552 | RWDD4     | 1,02E-03 | 2,04E-02 | 0,25  | 1,19 |
| ENSG00000101493 | ZNF516    | 1,02E-03 | 2,05E-02 | -0,26 | 0,83 |
| ENSG00000167632 | TRAPPC9   | 1,02E-03 | 2,05E-02 | -0,19 | 0,87 |
| ENSG00000146250 | PRSS35    | 1,02E-03 | 2,05E-02 | 1,08  | 2,11 |
| ENSG00000182095 | TNRC18    | 1,03E-03 | 2,05E-02 | -0,29 | 0,82 |
| ENSG00000108561 | C1QBP     | 1,04E-03 | 2,07E-02 | 0,17  | 1,13 |
| ENSG00000214941 | ZSWIM7    | 1,04E-03 | 2,07E-02 | 0,24  | 1,18 |
| ENSG00000128656 | CHN1      | 1,04E-03 | 2,08E-02 | 0,39  | 1,31 |



|                 |            |          |          |       |      |
|-----------------|------------|----------|----------|-------|------|
| ENSG00000168427 | KLHL30     | 1,05E-03 | 2,08E-02 | -0,70 | 0,61 |
| ENSG00000114686 | MRPL3      | 1,05E-03 | 2,09E-02 | 0,23  | 1,17 |
| ENSG00000122420 | PTGFR      | 1,05E-03 | 2,09E-02 | 0,52  | 1,44 |
| ENSG00000154945 | ANKRD40    | 1,06E-03 | 2,09E-02 | -0,30 | 0,81 |
| ENSG00000259826 | AC072061.1 | 1,06E-03 | 2,10E-02 | -0,60 | 0,66 |
| ENSG00000160408 | ST6GALNAC6 | 1,06E-03 | 2,10E-02 | -0,22 | 0,86 |
| ENSG00000084674 | APOB       | 1,07E-03 | 2,10E-02 | -0,96 | 0,52 |
| ENSG00000149346 | SLX4IP     | 1,07E-03 | 2,10E-02 | 0,24  | 1,18 |
| ENSG00000155438 | NIFK       | 1,07E-03 | 2,11E-02 | 0,22  | 1,17 |
| ENSG00000123131 | PRDX4      | 1,07E-03 | 2,11E-02 | 0,37  | 1,30 |
| ENSG00000161996 | WDR90      | 1,08E-03 | 2,11E-02 | -0,26 | 0,84 |
| ENSG00000146083 | RNF44      | 1,08E-03 | 2,12E-02 | -0,31 | 0,81 |
| ENSG00000133216 | EPHB2      | 1,08E-03 | 2,12E-02 | 0,44  | 1,35 |
| ENSG00000120820 | GLT8D2     | 1,08E-03 | 2,12E-02 | 0,49  | 1,41 |
| ENSG00000089248 | ERP29      | 1,08E-03 | 2,12E-02 | 0,17  | 1,12 |
| ENSG00000114573 | ATP6V1A    | 1,09E-03 | 2,13E-02 | 0,29  | 1,22 |
| ENSG00000163864 | NMNAT3     | 1,09E-03 | 2,13E-02 | -0,46 | 0,73 |
| ENSG00000137970 | RPL7P9     | 1,09E-03 | 2,13E-02 | 0,15  | 1,11 |
| ENSG00000074660 | SCARF1     | 1,10E-03 | 2,13E-02 | -0,23 | 0,85 |
| ENSG00000267653 | AC002546.1 | 1,11E-03 | 2,14E-02 | -0,87 | 0,55 |
| ENSG00000143850 | PLEKHA6    | 1,10E-03 | 2,14E-02 | -0,61 | 0,66 |
| ENSG00000088808 | PPP1R13B   | 1,10E-03 | 2,14E-02 | -0,23 | 0,85 |
| ENSG00000140577 | CRTC3      | 1,11E-03 | 2,14E-02 | -0,22 | 0,86 |
| ENSG00000137040 | RANBP6     | 1,11E-03 | 2,14E-02 | 0,18  | 1,13 |
| ENSG00000055163 | CYFIP2     | 1,10E-03 | 2,14E-02 | 0,34  | 1,27 |
| ENSG00000179981 | TSHZ1      | 1,11E-03 | 2,14E-02 | -0,23 | 0,85 |
| ENSG00000184371 | CSF1       | 1,11E-03 | 2,14E-02 | -0,28 | 0,83 |
| ENSG00000138756 | BMP2K      | 1,11E-03 | 2,14E-02 | 0,22  | 1,16 |
| ENSG00000168447 | SCNN1B     | 1,12E-03 | 2,14E-02 | -0,84 | 0,56 |
| ENSG00000170525 | PFKFB3     | 1,14E-03 | 2,18E-02 | -0,39 | 0,76 |
| ENSG00000203710 | CR1        | 1,14E-03 | 2,18E-02 | 0,42  | 1,34 |
| ENSG00000212464 | SNORA12    | 1,14E-03 | 2,19E-02 | 0,36  | 1,28 |
| ENSG00000156453 | PCDH1      | 1,15E-03 | 2,19E-02 | -0,30 | 0,82 |
| ENSG00000138029 | HADHB      | 1,15E-03 | 2,19E-02 | 0,15  | 1,11 |
| ENSG00000100330 | MTMR3      | 1,15E-03 | 2,19E-02 | -0,16 | 0,90 |
| ENSG00000256995 | AC084816.1 | 1,16E-03 | 2,20E-02 | -1,40 | 0,38 |
| ENSG00000157782 | CABP1      | 1,16E-03 | 2,20E-02 | -0,63 | 0,65 |
| ENSG00000213593 | TMX2       | 1,16E-03 | 2,20E-02 | 0,14  | 1,10 |
| ENSG00000184575 | XPOT       | 1,16E-03 | 2,20E-02 | 0,15  | 1,11 |
| ENSG00000065526 | SPEN       | 1,16E-03 | 2,20E-02 | -0,24 | 0,84 |
| ENSG00000110987 | BCL7A      | 1,17E-03 | 2,20E-02 | -0,35 | 0,78 |
| ENSG00000156860 | FBRS       | 1,17E-03 | 2,20E-02 | -0,26 | 0,84 |
| ENSG00000144749 | LRIG1      | 1,18E-03 | 2,22E-02 | -0,42 | 0,75 |
| ENSG00000148337 | CIZ1       | 1,18E-03 | 2,22E-02 | -0,23 | 0,85 |
| ENSG00000100478 | AP4S1      | 1,17E-03 | 2,22E-02 | 0,22  | 1,17 |
| ENSG00000115233 | PSMD14     | 1,18E-03 | 2,22E-02 | 0,26  | 1,20 |
| ENSG00000228549 | BX284668.2 | 1,18E-03 | 2,22E-02 | -1,25 | 0,42 |
| ENSG00000254332 | AF201337.1 | 1,18E-03 | 2,22E-02 | 0,38  | 1,30 |
| ENSG00000166405 | RIC3       | 1,19E-03 | 2,22E-02 | -0,85 | 0,55 |
| ENSG00000068366 | ACSL4      | 1,19E-03 | 2,22E-02 | 0,21  | 1,16 |

|                 |           |          |          |       |      |
|-----------------|-----------|----------|----------|-------|------|
| ENSG00000147036 | LANCL3    | 1,19E-03 | 2,22E-02 | 0,50  | 1,42 |
| ENSG00000132386 | SERPINF1  | 1,19E-03 | 2,22E-02 | 0,54  | 1,45 |
| ENSG00000112984 | KIF20A    | 1,19E-03 | 2,22E-02 | 0,98  | 1,97 |
| ENSG00000107185 | RGP1      | 1,20E-03 | 2,24E-02 | -0,19 | 0,88 |
| ENSG00000204628 | RACK1     | 1,20E-03 | 2,24E-02 | 0,13  | 1,09 |
| ENSG00000102908 | NFAT5     | 1,21E-03 | 2,25E-02 | -0,21 | 0,87 |
| ENSG00000196235 | SUPT5H    | 1,21E-03 | 2,25E-02 | -0,19 | 0,88 |
| ENSG00000119655 | NPC2      | 1,21E-03 | 2,25E-02 | 0,23  | 1,18 |
| ENSG00000140848 | CPNE2     | 1,22E-03 | 2,25E-02 | -0,16 | 0,89 |
| ENSG00000066697 | MSANTD3   | 1,23E-03 | 2,28E-02 | 0,38  | 1,30 |
| ENSG00000132326 | PER2      | 1,24E-03 | 2,29E-02 | -0,29 | 0,82 |
| ENSG00000188763 | FZD9      | 1,25E-03 | 2,30E-02 | -0,84 | 0,56 |
| ENSG00000156463 | SH3RF2    | 1,25E-03 | 2,30E-02 | -0,59 | 0,66 |
| ENSG00000183779 | ZNF703    | 1,26E-03 | 2,30E-02 | -0,45 | 0,73 |
| ENSG00000233608 | TWIST2    | 1,25E-03 | 2,30E-02 | -0,44 | 0,74 |
| ENSG00000134363 | FST       | 1,25E-03 | 2,30E-02 | -0,42 | 0,75 |
| ENSG00000248527 | MTATP6P1  | 1,25E-03 | 2,30E-02 | -0,38 | 0,77 |
| ENSG00000120896 | SORBS3    | 1,25E-03 | 2,30E-02 | -0,30 | 0,81 |
| ENSG00000132122 | SPATA6    | 1,26E-03 | 2,30E-02 | -0,23 | 0,85 |
| ENSG00000072135 | PTPN18    | 1,26E-03 | 2,30E-02 | -0,17 | 0,89 |
| ENSG00000108349 | CASC3     | 1,26E-03 | 2,30E-02 | -0,15 | 0,90 |
| ENSG00000138777 | PPA2      | 1,26E-03 | 2,30E-02 | 0,17  | 1,12 |
| ENSG00000108039 | XPNPEP1   | 1,26E-03 | 2,30E-02 | 0,18  | 1,13 |
| ENSG00000131174 | COX7B     | 1,26E-03 | 2,30E-02 | 0,23  | 1,18 |
| ENSG00000167861 | HID1      | 1,26E-03 | 2,30E-02 | -0,45 | 0,73 |
| ENSG00000072121 | ZFYVE26   | 1,27E-03 | 2,30E-02 | -0,10 | 0,93 |
| ENSG00000117448 | AKR1A1    | 1,27E-03 | 2,30E-02 | 0,19  | 1,14 |
| ENSG00000176142 | TMEM39A   | 1,27E-03 | 2,30E-02 | 0,21  | 1,16 |
| ENSG00000167460 | TPM4      | 1,27E-03 | 2,30E-02 | 0,27  | 1,20 |
| ENSG00000233006 | MIR3936HG | 1,28E-03 | 2,30E-02 | -0,48 | 0,72 |
| ENSG00000264672 | SEPT4-AS1 | 1,28E-03 | 2,30E-02 | 0,53  | 1,44 |
| ENSG00000228623 | ZNF883    | 1,28E-03 | 2,31E-02 | 0,59  | 1,51 |
| ENSG00000158445 | KCNB1     | 1,28E-03 | 2,31E-02 | -0,73 | 0,60 |
| ENSG00000006327 | TNFRSF12A | 1,28E-03 | 2,31E-02 | 0,59  | 1,50 |
| ENSG00000105227 | PRX       | 1,29E-03 | 2,32E-02 | -0,32 | 0,80 |
| ENSG00000178175 | ZNF366    | 1,29E-03 | 2,32E-02 | -0,26 | 0,84 |
| ENSG00000148296 | SURF6     | 1,30E-03 | 2,32E-02 | -0,21 | 0,86 |
| ENSG00000167863 | ATP5PD    | 1,30E-03 | 2,32E-02 | 0,14  | 1,10 |
| ENSG00000136810 | TXN       | 1,30E-03 | 2,32E-02 | 0,25  | 1,19 |
| ENSG00000099284 | H2AFY2    | 1,30E-03 | 2,32E-02 | 0,30  | 1,23 |
| ENSG00000158747 | NBL1      | 1,30E-03 | 2,32E-02 | 0,35  | 1,27 |
| ENSG00000100399 | CHADL     | 1,31E-03 | 2,33E-02 | -0,67 | 0,63 |
| ENSG00000182952 | HMGNA4    | 1,31E-03 | 2,33E-02 | 0,14  | 1,10 |
| ENSG00000103942 | HOMER2    | 1,31E-03 | 2,33E-02 | 0,40  | 1,32 |
| ENSG00000031081 | ARHGAP31  | 1,32E-03 | 2,35E-02 | -0,18 | 0,89 |
| ENSG00000108578 | BLMH      | 1,32E-03 | 2,35E-02 | 0,17  | 1,13 |
| ENSG00000124491 | F13A1     | 1,32E-03 | 2,35E-02 | 0,30  | 1,23 |
| ENSG00000037241 | RPL26L1   | 1,33E-03 | 2,35E-02 | 0,36  | 1,29 |
| ENSG00000129562 | DAD1      | 1,33E-03 | 2,36E-02 | 0,17  | 1,13 |
| ENSG00000275395 | FCGBP     | 1,34E-03 | 2,37E-02 | -0,50 | 0,71 |

|                 |            |          |          |       |      |
|-----------------|------------|----------|----------|-------|------|
| ENSG00000070366 | SMG6       | 1,34E-03 | 2,37E-02 | -0,16 | 0,90 |
| ENSG00000160741 | CRTC2      | 1,35E-03 | 2,37E-02 | -0,21 | 0,86 |
| ENSG00000179776 | CDH5       | 1,35E-03 | 2,38E-02 | -0,27 | 0,83 |
| ENSG00000166839 | ANKDD1A    | 1,35E-03 | 2,38E-02 | -0,42 | 0,75 |
| ENSG00000196262 | PPIA       | 1,36E-03 | 2,39E-02 | 0,15  | 1,11 |
| ENSG00000063241 | ISOC2      | 1,36E-03 | 2,39E-02 | 0,28  | 1,22 |
| ENSG00000120675 | DNAJC15    | 1,37E-03 | 2,40E-02 | 0,18  | 1,14 |
| ENSG00000153902 | LGI4       | 1,37E-03 | 2,40E-02 | -0,39 | 0,76 |
| ENSG00000148834 | GSTO1      | 1,37E-03 | 2,40E-02 | 0,22  | 1,17 |
| ENSG00000196531 | NACA       | 1,38E-03 | 2,41E-02 | 0,13  | 1,10 |
| ENSG00000063127 | SLC6A16    | 1,38E-03 | 2,41E-02 | -0,46 | 0,73 |
| ENSG00000167548 | KMT2D      | 1,40E-03 | 2,43E-02 | -0,29 | 0,82 |
| ENSG00000198517 | MAFK       | 1,40E-03 | 2,43E-02 | -0,22 | 0,86 |
| ENSG00000118515 | SGK1       | 1,40E-03 | 2,43E-02 | 0,27  | 1,21 |
| ENSG00000138207 | RBP4       | 1,40E-03 | 2,44E-02 | -0,41 | 0,75 |
| ENSG00000039560 | RAI14      | 1,41E-03 | 2,44E-02 | 0,24  | 1,18 |
| ENSG00000157617 | C2CD2      | 1,41E-03 | 2,45E-02 | -0,43 | 0,74 |
| ENSG00000119185 | ITGB1BP1   | 1,41E-03 | 2,45E-02 | -0,30 | 0,81 |
| ENSG00000060237 | WNK1       | 1,42E-03 | 2,46E-02 | -0,21 | 0,87 |
| ENSG00000125743 | SNRPD2     | 1,42E-03 | 2,46E-02 | 0,17  | 1,13 |
| ENSG00000228474 | OST4       | 1,42E-03 | 2,46E-02 | 0,20  | 1,15 |
| ENSG00000110514 | MADD       | 1,43E-03 | 2,46E-02 | -0,15 | 0,90 |
| ENSG00000120332 | TNN        | 1,43E-03 | 2,46E-02 | 0,76  | 1,69 |
| ENSG00000111229 | ARPC3      | 1,43E-03 | 2,47E-02 | 0,22  | 1,17 |
| ENSG00000105204 | DYRK1B     | 1,44E-03 | 2,48E-02 | -0,29 | 0,82 |
| ENSG00000196352 | CD55       | 1,44E-03 | 2,48E-02 | 0,54  | 1,46 |
| ENSG00000058091 | CDK14      | 1,45E-03 | 2,48E-02 | 0,35  | 1,28 |
| ENSG00000214357 | NEURL1B    | 1,45E-03 | 2,48E-02 | -0,29 | 0,82 |
| ENSG00000136010 | ALDH1L2    | 1,45E-03 | 2,48E-02 | 0,47  | 1,38 |
| ENSG00000125144 | MT1G       | 1,46E-03 | 2,50E-02 | 1,11  | 2,16 |
| ENSG00000158480 | SPATA2     | 1,47E-03 | 2,51E-02 | -0,28 | 0,82 |
| ENSG00000069535 | MAOB       | 1,47E-03 | 2,51E-02 | -0,64 | 0,64 |
| ENSG00000105662 | CRTC1      | 1,48E-03 | 2,51E-02 | -0,30 | 0,81 |
| ENSG00000253968 | AC016573.1 | 1,48E-03 | 2,52E-02 | -1,24 | 0,42 |
| ENSG00000112936 | C7         | 1,48E-03 | 2,52E-02 | 0,40  | 1,32 |
| ENSG00000166741 | NNMT       | 1,48E-03 | 2,52E-02 | 0,36  | 1,29 |
| ENSG00000114654 | EFCC1      | 1,49E-03 | 2,53E-02 | -0,46 | 0,73 |
| ENSG00000140836 | ZFHX3      | 1,50E-03 | 2,54E-02 | -0,30 | 0,81 |
| ENSG00000099194 | SCD        | 1,50E-03 | 2,54E-02 | 0,59  | 1,50 |
| ENSG00000139304 | PTPRQ      | 1,50E-03 | 2,54E-02 | -1,14 | 0,45 |
| ENSG00000146223 | RPL7L1     | 1,51E-03 | 2,54E-02 | 0,10  | 1,07 |
| ENSG00000170903 | MSANTD4    | 1,51E-03 | 2,54E-02 | 0,18  | 1,13 |
| ENSG00000076706 | AP002956.1 | 1,51E-03 | 2,55E-02 | -0,48 | 0,72 |
| ENSG00000244313 | AC024293.1 | 1,51E-03 | 2,55E-02 | 0,18  | 1,13 |
| ENSG00000122873 | CISD1      | 1,51E-03 | 2,55E-02 | 0,29  | 1,22 |
| ENSG00000094963 | FMO2       | 1,54E-03 | 2,56E-02 | -0,67 | 0,63 |
| ENSG00000141576 | RNF157     | 1,53E-03 | 2,56E-02 | -0,45 | 0,73 |
| ENSG00000197077 | KIAA1671   | 1,53E-03 | 2,56E-02 | -0,28 | 0,82 |
| ENSG00000197183 | NOL4L      | 1,53E-03 | 2,56E-02 | -0,26 | 0,84 |
| ENSG00000173517 | PEAK1      | 1,53E-03 | 2,56E-02 | -0,21 | 0,87 |

|                 |            |          |          |       |      |
|-----------------|------------|----------|----------|-------|------|
| ENSG00000183291 | SELENOF    | 1,52E-03 | 2,56E-02 | 0,16  | 1,12 |
| ENSG00000102898 | NUTF2      | 1,53E-03 | 2,56E-02 | 0,18  | 1,13 |
| ENSG00000100934 | SEC23A     | 1,53E-03 | 2,56E-02 | 0,20  | 1,15 |
| ENSG00000042753 | AP2S1      | 1,52E-03 | 2,56E-02 | 0,22  | 1,16 |
| ENSG00000236603 | RANP1      | 1,54E-03 | 2,56E-02 | 0,25  | 1,19 |
| ENSG00000140470 | ADAMTS17   | 1,54E-03 | 2,56E-02 | 0,39  | 1,31 |
| ENSG00000198853 | RUSC2      | 1,54E-03 | 2,56E-02 | -0,22 | 0,86 |
| ENSG00000187535 | IFT140     | 1,54E-03 | 2,56E-02 | -0,21 | 0,87 |
| ENSG00000189056 | RELN       | 1,54E-03 | 2,56E-02 | -0,91 | 0,53 |
| ENSG00000166716 | ZNF592     | 1,55E-03 | 2,56E-02 | -0,21 | 0,86 |
| ENSG00000140396 | NCOA2      | 1,55E-03 | 2,56E-02 | -0,12 | 0,92 |
| ENSG00000132510 | KDM6B      | 1,56E-03 | 2,58E-02 | -0,38 | 0,77 |
| ENSG00000100154 | TTC28      | 1,57E-03 | 2,58E-02 | -0,24 | 0,85 |
| ENSG00000233622 | CYP2T1P    | 1,57E-03 | 2,59E-02 | -0,60 | 0,66 |
| ENSG00000126005 | MMP24OS    | 1,57E-03 | 2,59E-02 | -0,24 | 0,85 |
| ENSG00000115594 | IL1R1      | 1,57E-03 | 2,59E-02 | 0,26  | 1,19 |
| ENSG00000112293 | GPLD1      | 1,58E-03 | 2,60E-02 | -0,48 | 0,72 |
| ENSG00000134684 | YARS       | 1,58E-03 | 2,60E-02 | 0,26  | 1,20 |
| ENSG00000137075 | RNF38      | 1,58E-03 | 2,60E-02 | -0,20 | 0,87 |
| ENSG00000146674 | IGFBP3     | 1,60E-03 | 2,63E-02 | -0,36 | 0,78 |
| ENSG00000073910 | FRY        | 1,60E-03 | 2,63E-02 | -0,29 | 0,82 |
| ENSG00000145687 | SSBP2      | 1,61E-03 | 2,63E-02 | -0,22 | 0,86 |
| ENSG00000213881 | NPM1P6     | 1,61E-03 | 2,63E-02 | 0,32  | 1,25 |
| ENSG00000164330 | EBF1       | 1,62E-03 | 2,64E-02 | -0,26 | 0,84 |
| ENSG00000154845 | PPP4R1     | 1,62E-03 | 2,64E-02 | 0,12  | 1,09 |
| ENSG00000280339 | AP001528.3 | 1,63E-03 | 2,65E-02 | -0,59 | 0,66 |
| ENSG00000157216 | SSBP3      | 1,63E-03 | 2,65E-02 | -0,23 | 0,85 |
| ENSG00000154358 | OBSCN      | 1,63E-03 | 2,65E-02 | -0,30 | 0,81 |
| ENSG00000168079 | SCARA5     | 1,63E-03 | 2,65E-02 | 0,77  | 1,71 |
| ENSG00000066379 | ZNRD1      | 1,64E-03 | 2,66E-02 | 0,23  | 1,18 |
| ENSG00000165914 | TTC7B      | 1,64E-03 | 2,66E-02 | -0,16 | 0,90 |
| ENSG00000166226 | CCT2       | 1,65E-03 | 2,68E-02 | 0,20  | 1,15 |
| ENSG00000146278 | PNRC1      | 1,67E-03 | 2,69E-02 | -0,20 | 0,87 |
| ENSG00000164647 | STEAP1     | 1,67E-03 | 2,69E-02 | 0,41  | 1,33 |
| ENSG00000128833 | MYO5C      | 1,68E-03 | 2,71E-02 | -0,37 | 0,78 |
| ENSG00000277494 | GPIHBP1    | 1,68E-03 | 2,71E-02 | -0,57 | 0,67 |
| ENSG00000107937 | GTPBP4     | 1,68E-03 | 2,71E-02 | 0,18  | 1,14 |
| ENSG00000142611 | PRDM16     | 1,69E-03 | 2,72E-02 | -0,43 | 0,74 |
| ENSG00000135148 | TRAFD1     | 1,69E-03 | 2,72E-02 | 0,18  | 1,13 |
| ENSG00000122884 | P4HA1      | 1,69E-03 | 2,72E-02 | 0,43  | 1,34 |
| ENSG00000113013 | HSPA9      | 1,70E-03 | 2,72E-02 | 0,15  | 1,11 |
| ENSG00000127083 | OMD        | 1,70E-03 | 2,72E-02 | 0,66  | 1,57 |
| ENSG00000179603 | GRM8       | 1,71E-03 | 2,73E-02 | -0,82 | 0,57 |
| ENSG00000183648 | NDUFB1     | 1,71E-03 | 2,73E-02 | 0,22  | 1,16 |
| ENSG00000152465 | NMT2       | 1,71E-03 | 2,73E-02 | -0,26 | 0,83 |
| ENSG00000117016 | RIMS3      | 1,72E-03 | 2,74E-02 | -0,39 | 0,76 |
| ENSG00000155660 | PDIA4      | 1,74E-03 | 2,77E-02 | 0,25  | 1,19 |
| ENSG00000171307 | ZDHHC16    | 1,74E-03 | 2,77E-02 | 0,20  | 1,15 |
| ENSG00000036549 | AC118549.1 | 1,75E-03 | 2,78E-02 | 0,13  | 1,10 |
| ENSG00000198886 | MT-ND4     | 1,75E-03 | 2,79E-02 | -0,43 | 0,74 |

|                 |           |          |          |       |      |
|-----------------|-----------|----------|----------|-------|------|
| ENSG00000082175 | PGR       | 1,75E-03 | 2,79E-02 | -0,45 | 0,73 |
| ENSG00000175348 | TMEM9B    | 1,76E-03 | 2,79E-02 | 0,16  | 1,12 |
| ENSG00000155368 | DBI       | 1,76E-03 | 2,79E-02 | 0,20  | 1,15 |
| ENSG00000163389 | POGLUT1   | 1,77E-03 | 2,80E-02 | 0,26  | 1,20 |
| ENSG00000162545 | CAMK2N1   | 1,78E-03 | 2,80E-02 | -0,45 | 0,73 |
| ENSG00000188177 | ZC3H6     | 1,78E-03 | 2,80E-02 | -0,24 | 0,84 |
| ENSG00000124160 | NCOA5     | 1,78E-03 | 2,80E-02 | -0,14 | 0,90 |
| ENSG00000005243 | COPZ2     | 1,77E-03 | 2,80E-02 | 0,42  | 1,34 |
| ENSG00000276566 | IGKV1D-13 | 1,77E-03 | 2,80E-02 | 0,52  | 1,43 |
| ENSG00000100982 | PCIF1     | 1,78E-03 | 2,80E-02 | -0,25 | 0,84 |
| ENSG00000197965 | MPZL1     | 1,78E-03 | 2,80E-02 | 0,27  | 1,21 |
| ENSG00000161649 | CD300LG   | 1,79E-03 | 2,81E-02 | -0,45 | 0,73 |
| ENSG00000122965 | RBM19     | 1,79E-03 | 2,81E-02 | -0,19 | 0,87 |
| ENSG00000184545 | DUSP8     | 1,82E-03 | 2,83E-02 | -0,67 | 0,63 |
| ENSG00000109846 | CRYAB     | 1,81E-03 | 2,83E-02 | -0,59 | 0,67 |
| ENSG00000128591 | FLNC      | 1,82E-03 | 2,83E-02 | -0,46 | 0,72 |
| ENSG00000149564 | ESAM      | 1,82E-03 | 2,83E-02 | -0,27 | 0,83 |
| ENSG00000065060 | UHRF1BP1  | 1,82E-03 | 2,83E-02 | -0,13 | 0,91 |
| ENSG00000173692 | PSMD1     | 1,82E-03 | 2,83E-02 | 0,15  | 1,11 |
| ENSG00000131236 | CAP1      | 1,80E-03 | 2,83E-02 | 0,16  | 1,11 |
| ENSG00000041357 | PSMA4     | 1,81E-03 | 2,83E-02 | 0,20  | 1,15 |
| ENSG00000213585 | VDAC1     | 1,82E-03 | 2,83E-02 | 0,20  | 1,15 |
| ENSG00000197496 | SLC2A10   | 1,80E-03 | 2,83E-02 | 0,34  | 1,26 |
| ENSG00000135838 | NPL       | 1,82E-03 | 2,83E-02 | 0,39  | 1,31 |
| ENSG00000265972 | TXNIP     | 1,83E-03 | 2,83E-02 | -0,36 | 0,78 |
| ENSG00000005022 | SLC25A5   | 1,83E-03 | 2,83E-02 | 0,18  | 1,13 |
| ENSG00000156467 | UQCRB     | 1,83E-03 | 2,83E-02 | 0,19  | 1,14 |
| ENSG00000154065 | ANKRD29   | 1,84E-03 | 2,85E-02 | -0,33 | 0,80 |
| ENSG00000179218 | CALR      | 1,85E-03 | 2,85E-02 | 0,22  | 1,17 |
| ENSG00000134986 | NREP      | 1,85E-03 | 2,85E-02 | 0,32  | 1,25 |
| ENSG00000261221 | ZNF865    | 1,85E-03 | 2,85E-02 | -0,34 | 0,79 |
| ENSG00000205339 | IPO7      | 1,85E-03 | 2,85E-02 | 0,15  | 1,11 |
| ENSG00000124786 | SLC35B3   | 1,85E-03 | 2,85E-02 | 0,30  | 1,23 |
| ENSG00000169991 | IFFO2     | 1,86E-03 | 2,86E-02 | -0,25 | 0,84 |
| ENSG00000257704 | INAFM1    | 1,87E-03 | 2,86E-02 | -0,29 | 0,82 |
| ENSG00000006016 | CRLF1     | 1,87E-03 | 2,86E-02 | 1,22  | 2,32 |
| ENSG00000008323 | PLEKHG6   | 1,87E-03 | 2,87E-02 | -0,76 | 0,59 |
| ENSG00000117600 | PLPPR4    | 1,87E-03 | 2,87E-02 | 0,45  | 1,37 |
| ENSG00000211445 | GPX3      | 1,88E-03 | 2,87E-02 | -0,58 | 0,67 |
| ENSG00000188825 | LINC00910 | 1,89E-03 | 2,88E-02 | -0,38 | 0,77 |
| ENSG00000115568 | ZNF142    | 1,89E-03 | 2,88E-02 | -0,20 | 0,87 |
| ENSG00000088833 | NSFL1C    | 1,89E-03 | 2,88E-02 | -0,20 | 0,87 |
| ENSG00000113369 | ARRDC3    | 1,89E-03 | 2,88E-02 | 0,22  | 1,17 |
| ENSG00000113273 | ARSB      | 1,89E-03 | 2,88E-02 | 0,39  | 1,31 |
| ENSG00000176438 | SYNE3     | 1,90E-03 | 2,88E-02 | -0,24 | 0,85 |
| ENSG00000106305 | AIMP2     | 1,91E-03 | 2,89E-02 | 0,24  | 1,18 |
| ENSG00000107263 | RAPGEF1   | 1,91E-03 | 2,90E-02 | -0,21 | 0,87 |
| ENSG00000088387 | DOCK9     | 1,91E-03 | 2,90E-02 | -0,19 | 0,88 |
| ENSG00000205403 | CFI       | 1,91E-03 | 2,90E-02 | 0,36  | 1,28 |
| ENSG00000149196 | HIKESHI   | 1,92E-03 | 2,90E-02 | 0,18  | 1,13 |

|                 |            |          |          |       |      |
|-----------------|------------|----------|----------|-------|------|
| ENSG00000114626 | ABTB1      | 1,92E-03 | 2,90E-02 | -0,27 | 0,83 |
| ENSG00000109756 | RAPGEF2    | 1,92E-03 | 2,90E-02 | -0,21 | 0,87 |
| ENSG00000100105 | PATZ1      | 1,93E-03 | 2,91E-02 | -0,21 | 0,87 |
| ENSG00000126107 | HECTD3     | 1,93E-03 | 2,91E-02 | -0,19 | 0,88 |
| ENSG00000134001 | EIF2S1     | 1,93E-03 | 2,91E-02 | 0,15  | 1,11 |
| ENSG00000196954 | CASP4      | 1,94E-03 | 2,91E-02 | 0,24  | 1,18 |
| ENSG00000122862 | SRGN       | 1,94E-03 | 2,91E-02 | 0,29  | 1,23 |
| ENSG00000183018 | AC118754.1 | 1,93E-03 | 2,91E-02 | 0,36  | 1,28 |
| ENSG00000203685 | STUM       | 1,94E-03 | 2,91E-02 | -0,43 | 0,74 |
| ENSG00000124181 | PLCG1      | 1,94E-03 | 2,91E-02 | -0,16 | 0,89 |
| ENSG00000121057 | AKAP1      | 1,95E-03 | 2,92E-02 | -0,35 | 0,78 |
| ENSG00000171863 | RPS7       | 1,96E-03 | 2,93E-02 | 0,18  | 1,13 |
| ENSG00000223559 | AC073136.1 | 1,98E-03 | 2,95E-02 | 0,28  | 1,22 |
| ENSG00000179134 | SAMD4B     | 1,98E-03 | 2,96E-02 | -0,20 | 0,87 |
| ENSG00000105576 | TNPO2      | 1,99E-03 | 2,96E-02 | -0,18 | 0,88 |
| ENSG00000172974 | AC007318.1 | 1,99E-03 | 2,97E-02 | 0,16  | 1,12 |
| ENSG00000184983 | NDUFA6     | 2,00E-03 | 2,98E-02 | 0,19  | 1,14 |
| ENSG00000140406 | TLNRD1     | 2,00E-03 | 2,98E-02 | -0,23 | 0,85 |
| ENSG00000151240 | DIP2C      | 2,01E-03 | 2,98E-02 | -0,28 | 0,83 |
| ENSG00000244038 | DDOST      | 2,01E-03 | 2,99E-02 | 0,16  | 1,12 |
| ENSG00000104723 | TUSC3      | 2,02E-03 | 2,99E-02 | 0,32  | 1,25 |
| ENSG00000089472 | HEPH       | 2,02E-03 | 3,00E-02 | 0,36  | 1,28 |
| ENSG00000119689 | DLST       | 2,03E-03 | 3,00E-02 | -0,13 | 0,91 |
| ENSG00000057252 | SOAT1      | 2,03E-03 | 3,00E-02 | 0,13  | 1,09 |
| ENSG00000229117 | RPL41      | 2,03E-03 | 3,00E-02 | 0,22  | 1,16 |
| ENSG00000164879 | CA3        | 2,03E-03 | 3,00E-02 | 0,38  | 1,30 |
| ENSG00000159640 | ACE        | 2,04E-03 | 3,01E-02 | -0,38 | 0,77 |
| ENSG00000162413 | KLHL21     | 2,06E-03 | 3,02E-02 | -0,23 | 0,85 |
| ENSG00000095261 | PSMD5      | 2,05E-03 | 3,02E-02 | 0,14  | 1,10 |
| ENSG00000154589 | LY96       | 2,06E-03 | 3,02E-02 | 0,45  | 1,37 |
| ENSG00000182544 | MFSD5      | 2,06E-03 | 3,02E-02 | 0,20  | 1,15 |
| ENSG00000160094 | ZNF362     | 2,07E-03 | 3,04E-02 | -0,23 | 0,85 |
| ENSG00000283213 | AC130466.1 | 2,08E-03 | 3,04E-02 | -0,55 | 0,68 |
| ENSG00000140367 | UBE2Q2     | 2,08E-03 | 3,04E-02 | 0,22  | 1,17 |
| ENSG00000174697 | LEP        | 2,10E-03 | 3,06E-02 | -1,29 | 0,41 |
| ENSG00000242498 | ARPIN      | 2,09E-03 | 3,06E-02 | -0,22 | 0,86 |
| ENSG00000151490 | PTPRO      | 2,10E-03 | 3,06E-02 | 0,49  | 1,40 |
| ENSG00000264522 | OTUD7B     | 2,10E-03 | 3,06E-02 | -0,26 | 0,83 |
| ENSG00000104691 | UBXN8      | 2,10E-03 | 3,06E-02 | 0,29  | 1,22 |
| ENSG00000168461 | RAB31      | 2,10E-03 | 3,06E-02 | 0,23  | 1,17 |
| ENSG00000166816 | LDHD       | 2,12E-03 | 3,07E-02 | -0,33 | 0,80 |
| ENSG00000184432 | COPB2      | 2,11E-03 | 3,07E-02 | 0,21  | 1,16 |
| ENSG00000118508 | RAB32      | 2,12E-03 | 3,07E-02 | 0,21  | 1,16 |
| ENSG00000082153 | BZW1       | 2,11E-03 | 3,07E-02 | 0,24  | 1,18 |
| ENSG00000153975 | ZUP1       | 2,11E-03 | 3,07E-02 | 0,26  | 1,20 |
| ENSG00000216285 | AC078819.1 | 2,12E-03 | 3,07E-02 | 0,41  | 1,32 |
| ENSG00000173597 | SULT1B1    | 2,12E-03 | 3,07E-02 | 0,49  | 1,41 |
| ENSG00000078053 | AMPH       | 2,12E-03 | 3,07E-02 | 0,59  | 1,51 |
| ENSG00000167306 | MYO5B      | 2,12E-03 | 3,07E-02 | 0,64  | 1,56 |
| ENSG00000180329 | CCDC43     | 2,13E-03 | 3,07E-02 | 0,20  | 1,15 |

|                 |            |          |          |       |      |
|-----------------|------------|----------|----------|-------|------|
| ENSG00000129244 | ATP1B2     | 2,13E-03 | 3,07E-02 | -0,50 | 0,71 |
| ENSG00000100603 | SNW1       | 2,13E-03 | 3,07E-02 | 0,12  | 1,08 |
| ENSG00000204371 | EHMT2      | 2,14E-03 | 3,08E-02 | -0,15 | 0,90 |
| ENSG00000023697 | DERA       | 2,14E-03 | 3,08E-02 | 0,22  | 1,17 |
| ENSG00000162694 | EXTL2      | 2,15E-03 | 3,09E-02 | 0,29  | 1,22 |
| ENSG00000159387 | IRX6       | 2,17E-03 | 3,10E-02 | -0,59 | 0,66 |
| ENSG00000198727 | MT-CYB     | 2,17E-03 | 3,10E-02 | -0,39 | 0,76 |
| ENSG00000226415 | TPI1P1     | 2,16E-03 | 3,10E-02 | 0,27  | 1,21 |
| ENSG00000127080 | IPPK       | 2,17E-03 | 3,11E-02 | 0,24  | 1,18 |
| ENSG00000165973 | NELL1      | 2,17E-03 | 3,11E-02 | 0,79  | 1,74 |
| ENSG00000229715 | EEF1DP3    | 2,18E-03 | 3,11E-02 | -0,49 | 0,71 |
| ENSG00000163536 | SERPINI1   | 2,19E-03 | 3,12E-02 | -0,47 | 0,72 |
| ENSG00000166268 | MYRFL      | 2,19E-03 | 3,12E-02 | -0,90 | 0,54 |
| ENSG00000163820 | FYCO1      | 2,19E-03 | 3,12E-02 | -0,21 | 0,86 |
| ENSG00000089053 | ANAPC5     | 2,19E-03 | 3,12E-02 | 0,16  | 1,12 |
| ENSG00000120149 | MSX2       | 2,20E-03 | 3,13E-02 | 0,72  | 1,64 |
| ENSG00000144736 | SHQ1       | 2,21E-03 | 3,14E-02 | 0,22  | 1,16 |
| ENSG00000259916 | AL845331.2 | 2,24E-03 | 3,16E-02 | -1,10 | 0,46 |
| ENSG00000146122 | DAAM2      | 2,24E-03 | 3,16E-02 | -0,26 | 0,83 |
| ENSG00000156304 | SCAF4      | 2,23E-03 | 3,16E-02 | -0,22 | 0,86 |
| ENSG00000153048 | CARHSP1    | 2,24E-03 | 3,16E-02 | -0,18 | 0,88 |
| ENSG00000198431 | TXNRD1     | 2,24E-03 | 3,16E-02 | 0,14  | 1,10 |
| ENSG00000089063 | TMEM230    | 2,23E-03 | 3,16E-02 | 0,17  | 1,13 |
| ENSG00000136521 | NDUFB5     | 2,24E-03 | 3,16E-02 | 0,19  | 1,14 |
| ENSG00000170558 | CDH2       | 2,23E-03 | 3,16E-02 | 0,75  | 1,68 |
| ENSG00000120217 | CD274      | 2,25E-03 | 3,17E-02 | -0,45 | 0,73 |
| ENSG00000072422 | RHOBTB1    | 2,25E-03 | 3,18E-02 | 0,25  | 1,19 |
| ENSG00000085741 | WNT11      | 2,26E-03 | 3,19E-02 | -0,56 | 0,68 |
| ENSG00000188342 | GTF2F2     | 2,26E-03 | 3,19E-02 | 0,16  | 1,12 |
| ENSG00000225032 | AL162586.1 | 2,27E-03 | 3,19E-02 | -0,45 | 0,73 |
| ENSG00000170088 | TMEM192    | 2,27E-03 | 3,19E-02 | -0,16 | 0,90 |
| ENSG00000153303 | FRMD1      | 2,28E-03 | 3,20E-02 | -0,46 | 0,73 |
| ENSG00000166986 | MARS       | 2,28E-03 | 3,20E-02 | 0,19  | 1,14 |
| ENSG00000057704 | TMCC3      | 2,29E-03 | 3,21E-02 | -0,22 | 0,86 |
| ENSG00000187720 | THSD4      | 2,29E-03 | 3,21E-02 | 0,37  | 1,30 |
| ENSG00000137962 | ARHGAP29   | 2,30E-03 | 3,21E-02 | -0,34 | 0,79 |
| ENSG00000149328 | GLB1L2     | 2,31E-03 | 3,22E-02 | -0,54 | 0,69 |
| ENSG00000071282 | LMCD1      | 2,31E-03 | 3,22E-02 | -0,38 | 0,77 |
| ENSG00000108828 | VAT1       | 2,30E-03 | 3,22E-02 | -0,21 | 0,87 |
| ENSG00000235174 | RPL39P3    | 2,31E-03 | 3,22E-02 | 0,21  | 1,16 |
| ENSG00000185015 | CA13       | 2,31E-03 | 3,22E-02 | 0,34  | 1,26 |
| ENSG00000235823 | OLMALINC   | 2,32E-03 | 3,23E-02 | -0,56 | 0,68 |
| ENSG00000149596 | JPH2       | 2,32E-03 | 3,23E-02 | -0,48 | 0,72 |
| ENSG00000276710 | CSPG4P10   | 2,33E-03 | 3,23E-02 | -0,44 | 0,74 |
| ENSG00000221817 | PPP3CB-AS1 | 2,33E-03 | 3,23E-02 | -0,29 | 0,82 |
| ENSG00000117643 | MAN1C1     | 2,34E-03 | 3,23E-02 | -0,28 | 0,82 |
| ENSG00000099381 | SETD1A     | 2,34E-03 | 3,23E-02 | -0,28 | 0,82 |
| ENSG00000165895 | ARHGAP42   | 2,34E-03 | 3,23E-02 | -0,26 | 0,84 |
| ENSG00000112837 | TBX18      | 2,34E-03 | 3,24E-02 | -0,30 | 0,81 |
| ENSG00000261371 | PECAM1     | 2,34E-03 | 3,24E-02 | -0,29 | 0,82 |

|                 |            |          |          |       |      |
|-----------------|------------|----------|----------|-------|------|
| ENSG00000088038 | CNOT3      | 2,35E-03 | 3,24E-02 | -0,23 | 0,85 |
| ENSG00000114450 | GNB4       | 2,35E-03 | 3,24E-02 | 0,23  | 1,17 |
| ENSG00000258498 | DIO3OS     | 2,35E-03 | 3,24E-02 | -0,42 | 0,75 |
| ENSG00000147113 | DIPK2B     | 2,36E-03 | 3,24E-02 | -0,26 | 0,83 |
| ENSG00000167395 | ZNF646     | 2,36E-03 | 3,24E-02 | -0,23 | 0,85 |
| ENSG00000173141 | MRPL57     | 2,36E-03 | 3,24E-02 | 0,17  | 1,13 |
| ENSG00000180964 | TCEAL8     | 2,36E-03 | 3,24E-02 | 0,21  | 1,16 |
| ENSG00000122367 | LDB3       | 2,37E-03 | 3,24E-02 | -0,38 | 0,77 |
| ENSG00000101134 | DOK5       | 2,37E-03 | 3,24E-02 | 0,49  | 1,41 |
| ENSG00000012048 | BRCA1      | 2,37E-03 | 3,25E-02 | 0,21  | 1,16 |
| ENSG00000164442 | CITED2     | 2,38E-03 | 3,25E-02 | -0,36 | 0,78 |
| ENSG00000011523 | CEP68      | 2,38E-03 | 3,25E-02 | -0,20 | 0,87 |
| ENSG00000078699 | CBFA2T2    | 2,39E-03 | 3,25E-02 | -0,17 | 0,89 |
| ENSG00000152377 | SPOCK1     | 2,39E-03 | 3,25E-02 | 0,43  | 1,34 |
| ENSG00000169884 | WNT10B     | 2,38E-03 | 3,25E-02 | 0,58  | 1,49 |
| ENSG00000186472 | PCLO       | 2,39E-03 | 3,26E-02 | -0,60 | 0,66 |
| ENSG00000101004 | NINL       | 2,39E-03 | 3,26E-02 | -0,24 | 0,85 |
| ENSG00000100297 | MCM5       | 2,40E-03 | 3,26E-02 | -0,16 | 0,89 |
| ENSG00000113448 | PDE4D      | 2,40E-03 | 3,26E-02 | 0,25  | 1,19 |
| ENSG00000134259 | NGF        | 2,40E-03 | 3,26E-02 | 0,44  | 1,36 |
| ENSG00000110092 | CCND1      | 2,43E-03 | 3,29E-02 | -0,26 | 0,84 |
| ENSG00000197563 | PIGN       | 2,43E-03 | 3,29E-02 | 0,17  | 1,12 |
| ENSG00000134121 | CHL1       | 2,44E-03 | 3,30E-02 | 0,24  | 1,18 |
| ENSG00000154511 | DIPK1A     | 2,44E-03 | 3,30E-02 | 0,27  | 1,21 |
| ENSG00000028528 | SNX1       | 2,44E-03 | 3,30E-02 | -0,21 | 0,86 |
| ENSG00000108468 | CBX1       | 2,45E-03 | 3,31E-02 | 0,16  | 1,12 |
| ENSG00000237748 | UQCRBP1    | 2,45E-03 | 3,31E-02 | 0,32  | 1,24 |
| ENSG00000166477 | LEO1       | 2,46E-03 | 3,31E-02 | 0,25  | 1,19 |
| ENSG00000137269 | LRRC1      | 2,46E-03 | 3,31E-02 | 0,20  | 1,15 |
| ENSG00000172817 | CYP7B1     | 2,47E-03 | 3,32E-02 | 0,28  | 1,22 |
| ENSG00000142599 | RERE       | 2,47E-03 | 3,32E-02 | -0,25 | 0,84 |
| ENSG00000071246 | VASH1      | 2,47E-03 | 3,32E-02 | -0,20 | 0,87 |
| ENSG00000214870 | AC004540.1 | 2,48E-03 | 3,32E-02 | -0,56 | 0,68 |
| ENSG00000147419 | CCDC25     | 2,48E-03 | 3,32E-02 | 0,15  | 1,11 |
| ENSG00000117707 | PROX1      | 2,48E-03 | 3,32E-02 | -0,66 | 0,63 |
| ENSG00000126860 | EVI2A      | 2,48E-03 | 3,32E-02 | 0,42  | 1,34 |
| ENSG00000126883 | NUP214     | 2,50E-03 | 3,34E-02 | -0,16 | 0,89 |
| ENSG00000170266 | GLB1       | 2,50E-03 | 3,34E-02 | 0,21  | 1,16 |
| ENSG00000181291 | TMEM132E   | 2,50E-03 | 3,34E-02 | 0,86  | 1,81 |
| ENSG00000125870 | SNRPB2     | 2,52E-03 | 3,36E-02 | 0,21  | 1,16 |
| ENSG00000196313 | POM121     | 2,53E-03 | 3,37E-02 | -0,20 | 0,87 |
| ENSG00000115944 | COX7A2L    | 2,53E-03 | 3,37E-02 | 0,15  | 1,11 |
| ENSG00000123009 | NME2P1     | 2,53E-03 | 3,37E-02 | 0,30  | 1,23 |
| ENSG00000278948 | AL031587.5 | 2,53E-03 | 3,37E-02 | -0,35 | 0,78 |
| ENSG00000061936 | SFSWAP     | 2,54E-03 | 3,37E-02 | -0,16 | 0,89 |
| ENSG00000175315 | CST6       | 2,55E-03 | 3,38E-02 | -0,61 | 0,65 |
| ENSG00000005102 | MEOX1      | 2,55E-03 | 3,38E-02 | -0,58 | 0,67 |
| ENSG00000016864 | GLT8D1     | 2,55E-03 | 3,38E-02 | 0,22  | 1,16 |
| ENSG00000196547 | MAN2A2     | 2,56E-03 | 3,38E-02 | -0,23 | 0,85 |
| ENSG00000136888 | ATP6V1G1   | 2,56E-03 | 3,39E-02 | 0,25  | 1,19 |



|                 |           |          |          |       |      |
|-----------------|-----------|----------|----------|-------|------|
| ENSG00000185010 | F8        | 2,59E-03 | 3,42E-02 | -0,37 | 0,77 |
| ENSG00000171793 | CTPS1     | 2,59E-03 | 3,42E-02 | 0,37  | 1,29 |
| ENSG00000171241 | SHCBP1    | 2,60E-03 | 3,43E-02 | 0,57  | 1,48 |
| ENSG00000178538 | CA8       | 2,62E-03 | 3,43E-02 | -0,52 | 0,70 |
| ENSG00000212907 | MT-ND4L   | 2,62E-03 | 3,43E-02 | -0,44 | 0,74 |
| ENSG00000171914 | TLN2      | 2,60E-03 | 3,43E-02 | -0,30 | 0,81 |
| ENSG00000250571 | GLI4      | 2,61E-03 | 3,43E-02 | -0,29 | 0,82 |
| ENSG00000172840 | PDP2      | 2,61E-03 | 3,43E-02 | -0,21 | 0,86 |
| ENSG00000111639 | MRPL51    | 2,61E-03 | 3,43E-02 | 0,19  | 1,14 |
| ENSG00000064652 | SNX24     | 2,61E-03 | 3,43E-02 | 0,29  | 1,23 |
| ENSG00000158089 | GALNT14   | 2,61E-03 | 3,43E-02 | 0,56  | 1,48 |
| ENSG00000101444 | AHCY      | 2,62E-03 | 3,43E-02 | 0,18  | 1,13 |
| ENSG00000204262 | COL5A2    | 2,62E-03 | 3,43E-02 | 0,70  | 1,63 |
| ENSG00000240489 | SETP14    | 2,63E-03 | 3,44E-02 | 0,19  | 1,14 |
| ENSG00000169231 | THBS3     | 2,63E-03 | 3,44E-02 | 0,47  | 1,39 |
| ENSG00000069956 | MAPK6     | 2,64E-03 | 3,44E-02 | 0,27  | 1,20 |
| ENSG00000133110 | POSTN     | 2,64E-03 | 3,44E-02 | 1,03  | 2,04 |
| ENSG00000082482 | KCNK2     | 2,64E-03 | 3,44E-02 | 0,82  | 1,76 |
| ENSG00000165821 | SALL2     | 2,65E-03 | 3,45E-02 | -0,31 | 0,81 |
| ENSG00000124171 | PARD6B    | 2,65E-03 | 3,45E-02 | -0,43 | 0,74 |
| ENSG00000165113 | GKAP1     | 2,65E-03 | 3,45E-02 | -0,36 | 0,78 |
| ENSG00000142279 | WTIP      | 2,66E-03 | 3,45E-02 | -0,26 | 0,84 |
| ENSG00000179456 | ZBTB18    | 2,67E-03 | 3,47E-02 | -0,27 | 0,83 |
| ENSG00000186868 | MAPT      | 2,68E-03 | 3,47E-02 | -0,70 | 0,61 |
| ENSG00000221968 | FADS3     | 2,68E-03 | 3,47E-02 | -0,33 | 0,80 |
| ENSG00000167210 | LOXHD1    | 2,69E-03 | 3,48E-02 | -0,63 | 0,65 |
| ENSG00000136731 | UGGT1     | 2,69E-03 | 3,49E-02 | 0,14  | 1,11 |
| ENSG00000104967 | NOVA2     | 2,70E-03 | 3,49E-02 | -0,41 | 0,75 |
| ENSG00000102554 | KLF5      | 2,70E-03 | 3,49E-02 | -0,27 | 0,83 |
| ENSG00000135686 | KLHL36    | 2,71E-03 | 3,49E-02 | -0,19 | 0,87 |
| ENSG00000266412 | NCOA4     | 2,71E-03 | 3,49E-02 | 0,18  | 1,14 |
| ENSG00000163638 | ADAMTS9   | 2,71E-03 | 3,49E-02 | 0,41  | 1,33 |
| ENSG00000228971 | LINC02607 | 2,73E-03 | 3,51E-02 | -0,93 | 0,52 |
| ENSG00000184634 | MED12     | 2,73E-03 | 3,51E-02 | -0,19 | 0,87 |
| ENSG00000167552 | TUBA1A    | 2,73E-03 | 3,51E-02 | 0,19  | 1,14 |
| ENSG00000064102 | INTS13    | 2,73E-03 | 3,51E-02 | 0,21  | 1,16 |
| ENSG00000178947 | SMIM10L2A | 2,74E-03 | 3,51E-02 | -0,31 | 0,81 |
| ENSG00000066735 | KIF26A    | 2,74E-03 | 3,52E-02 | -0,32 | 0,80 |
| ENSG00000171475 | WIPF2     | 2,76E-03 | 3,53E-02 | -0,18 | 0,88 |
| ENSG00000198218 | QRICH1    | 2,76E-03 | 3,53E-02 | -0,12 | 0,92 |
| ENSG00000134851 | TMEM165   | 2,76E-03 | 3,53E-02 | 0,19  | 1,14 |
| ENSG00000138018 | SELENOI   | 2,77E-03 | 3,54E-02 | 0,24  | 1,18 |
| ENSG00000147416 | ATP6V1B2  | 2,77E-03 | 3,54E-02 | 0,30  | 1,23 |
| ENSG00000157152 | SYN2      | 2,79E-03 | 3,55E-02 | -0,67 | 0,63 |
| ENSG00000183833 | MAATS1    | 2,80E-03 | 3,55E-02 | -0,42 | 0,75 |
| ENSG00000021645 | NRXN3     | 2,78E-03 | 3,55E-02 | -0,31 | 0,81 |
| ENSG00000059145 | UNKL      | 2,80E-03 | 3,55E-02 | -0,21 | 0,86 |
| ENSG00000068323 | TFE3      | 2,78E-03 | 3,55E-02 | -0,21 | 0,87 |
| ENSG00000197724 | PHF2      | 2,80E-03 | 3,55E-02 | -0,16 | 0,89 |
| ENSG00000179335 | CLK3      | 2,79E-03 | 3,55E-02 | -0,16 | 0,90 |

|                 |            |          |          |       |      |
|-----------------|------------|----------|----------|-------|------|
| ENSG00000100532 | CGRRF1     | 2,80E-03 | 3,55E-02 | 0,24  | 1,18 |
| ENSG00000128606 | LRRC17     | 2,79E-03 | 3,55E-02 | 0,48  | 1,39 |
| ENSG00000211663 | IGLV3-19   | 2,79E-03 | 3,55E-02 | 0,56  | 1,47 |
| ENSG00000112394 | SLC16A10   | 2,79E-03 | 3,55E-02 | 0,80  | 1,74 |
| ENSG00000100441 | KHNYN      | 2,80E-03 | 3,55E-02 | -0,14 | 0,91 |
| ENSG00000204253 | HNRNPCP2   | 2,81E-03 | 3,55E-02 | 0,18  | 1,13 |
| ENSG00000080802 | CNOT4      | 2,81E-03 | 3,55E-02 | -0,16 | 0,90 |
| ENSG00000135424 | ITGA7      | 2,81E-03 | 3,55E-02 | -0,50 | 0,71 |
| ENSG00000124562 | SNRPC      | 2,82E-03 | 3,55E-02 | 0,19  | 1,14 |
| ENSG00000092931 | MFSD11     | 2,82E-03 | 3,56E-02 | 0,17  | 1,13 |
| ENSG00000095574 | IKZF5      | 2,84E-03 | 3,57E-02 | -0,24 | 0,85 |
| ENSG00000205336 | ADGRG1     | 2,85E-03 | 3,59E-02 | -0,36 | 0,78 |
| ENSG00000173599 | PC         | 2,86E-03 | 3,60E-02 | -0,27 | 0,83 |
| ENSG00000173409 | ARV1       | 2,86E-03 | 3,60E-02 | 0,22  | 1,17 |
| ENSG00000106803 | SEC61B     | 2,86E-03 | 3,60E-02 | 0,22  | 1,17 |
| ENSG00000148841 | ITPRIP     | 2,87E-03 | 3,60E-02 | -0,26 | 0,84 |
| ENSG00000165861 | ZFYVE1     | 2,88E-03 | 3,61E-02 | -0,16 | 0,89 |
| ENSG00000204256 | BRD2       | 2,89E-03 | 3,61E-02 | -0,10 | 0,94 |
| ENSG00000206417 | H1FX-AS1   | 2,89E-03 | 3,62E-02 | -0,34 | 0,79 |
| ENSG00000112110 | MRPL18     | 2,90E-03 | 3,62E-02 | 0,17  | 1,13 |
| ENSG00000159403 | C1R        | 2,90E-03 | 3,62E-02 | 0,40  | 1,32 |
| ENSG00000184811 | TRARG1     | 2,91E-03 | 3,63E-02 | -0,86 | 0,55 |
| ENSG00000253200 | AC037459.3 | 2,91E-03 | 3,63E-02 | -0,28 | 0,82 |
| ENSG00000095370 | SH2D3C     | 2,92E-03 | 3,63E-02 | -0,24 | 0,84 |
| ENSG00000156261 | CCT8       | 2,92E-03 | 3,63E-02 | 0,16  | 1,12 |
| ENSG00000174516 | PELI3      | 2,95E-03 | 3,67E-02 | -0,25 | 0,84 |
| ENSG00000130311 | DDA1       | 2,95E-03 | 3,67E-02 | -0,20 | 0,87 |
| ENSG00000151150 | ANK3       | 2,96E-03 | 3,68E-02 | 0,38  | 1,30 |
| ENSG00000112941 | TENT4A     | 2,96E-03 | 3,68E-02 | -0,16 | 0,90 |
| ENSG00000167695 | FAM57A     | 2,97E-03 | 3,68E-02 | 0,39  | 1,31 |
| ENSG00000105058 | FAM32A     | 2,97E-03 | 3,68E-02 | 0,15  | 1,11 |
| ENSG00000127946 | HIP1       | 2,98E-03 | 3,69E-02 | -0,17 | 0,89 |
| ENSG00000263465 | SRSF8      | 2,99E-03 | 3,70E-02 | -0,12 | 0,92 |
| ENSG00000123243 | ITIH5      | 3,00E-03 | 3,71E-02 | -0,55 | 0,68 |
| ENSG00000123066 | MED13L     | 3,00E-03 | 3,71E-02 | -0,16 | 0,90 |
| ENSG00000141232 | TOB1       | 3,01E-03 | 3,71E-02 | -0,29 | 0,82 |
| ENSG00000064726 | BTBD1      | 3,03E-03 | 3,74E-02 | 0,16  | 1,12 |
| ENSG00000177508 | IRX3       | 3,03E-03 | 3,74E-02 | -0,37 | 0,77 |
| ENSG00000143674 | MAP3K21    | 3,04E-03 | 3,74E-02 | -0,38 | 0,77 |
| ENSG00000189129 | PLAC9      | 3,05E-03 | 3,74E-02 | -0,32 | 0,80 |
| ENSG00000196781 | TLE1       | 3,05E-03 | 3,74E-02 | -0,32 | 0,80 |
| ENSG00000100345 | MYH9       | 3,04E-03 | 3,74E-02 | -0,21 | 0,87 |
| ENSG00000143258 | USP21      | 3,04E-03 | 3,74E-02 | -0,20 | 0,87 |
| ENSG00000180447 | GAS1       | 3,05E-03 | 3,74E-02 | 0,41  | 1,33 |
| ENSG00000205726 | ITSN1      | 3,06E-03 | 3,76E-02 | -0,25 | 0,84 |
| ENSG00000003402 | CFLAR      | 3,07E-03 | 3,76E-02 | -0,19 | 0,88 |
| ENSG00000164128 | NPY1R      | 3,08E-03 | 3,76E-02 | -0,77 | 0,59 |
| ENSG00000085276 | MECOM      | 3,08E-03 | 3,76E-02 | -0,29 | 0,82 |
| ENSG00000198231 | DDX42      | 3,07E-03 | 3,76E-02 | -0,13 | 0,92 |
| ENSG00000090266 | NDUFB2     | 3,08E-03 | 3,76E-02 | 0,22  | 1,16 |

|                 |           |          |          |       |      |
|-----------------|-----------|----------|----------|-------|------|
| ENSG00000147421 | HMBOX1    | 3,09E-03 | 3,77E-02 | -0,18 | 0,88 |
| ENSG00000005059 | MCUB      | 3,09E-03 | 3,77E-02 | 0,26  | 1,20 |
| ENSG00000089685 | BIRC5     | 3,09E-03 | 3,77E-02 | 0,67  | 1,59 |
| ENSG00000164946 | FREM1     | 3,11E-03 | 3,79E-02 | -0,49 | 0,71 |
| ENSG00000252010 | SCARNA5   | 3,12E-03 | 3,80E-02 | 0,20  | 1,15 |
| ENSG00000185518 | SV2B      | 3,13E-03 | 3,80E-02 | -0,53 | 0,69 |
| ENSG00000039523 | RIPOR1    | 3,13E-03 | 3,80E-02 | -0,36 | 0,78 |
| ENSG00000134697 | GNL2      | 3,13E-03 | 3,80E-02 | 0,17  | 1,13 |
| ENSG00000145284 | SCD5      | 3,13E-03 | 3,80E-02 | 0,35  | 1,27 |
| ENSG00000174851 | YIF1A     | 3,14E-03 | 3,81E-02 | 0,22  | 1,16 |
| ENSG00000130856 | ZNF236    | 3,15E-03 | 3,81E-02 | -0,15 | 0,90 |
| ENSG00000091483 | FH        | 3,15E-03 | 3,81E-02 | 0,16  | 1,12 |
| ENSG00000149532 | CPSF7     | 3,16E-03 | 3,82E-02 | -0,13 | 0,92 |
| ENSG00000160752 | FDPS      | 3,16E-03 | 3,82E-02 | 0,16  | 1,12 |
| ENSG00000280411 | IGHV1-69D | 3,17E-03 | 3,82E-02 | 0,85  | 1,80 |
| ENSG00000004776 | HSPB6     | 3,17E-03 | 3,82E-02 | -0,74 | 0,60 |
| ENSG00000180581 | SRP9P1    | 3,18E-03 | 3,83E-02 | 0,27  | 1,21 |
| ENSG00000171596 | NMUR1     | 3,18E-03 | 3,83E-02 | -0,50 | 0,71 |
| ENSG00000144891 | AGTR1     | 3,18E-03 | 3,83E-02 | -0,47 | 0,72 |
| ENSG00000124374 | PAIP2B    | 3,21E-03 | 3,85E-02 | -0,34 | 0,79 |
| ENSG00000165626 | BEND7     | 3,22E-03 | 3,85E-02 | -0,34 | 0,79 |
| ENSG00000186001 | LRCH3     | 3,22E-03 | 3,85E-02 | -0,11 | 0,92 |
| ENSG00000138496 | PARP9     | 3,22E-03 | 3,85E-02 | 0,20  | 1,15 |
| ENSG00000204272 | NBDY      | 3,20E-03 | 3,85E-02 | 0,21  | 1,16 |
| ENSG00000103591 | AAGAB     | 3,22E-03 | 3,85E-02 | 0,23  | 1,17 |
| ENSG00000185483 | ROR1      | 3,21E-03 | 3,85E-02 | 0,30  | 1,23 |
| ENSG00000116132 | PRRX1     | 3,22E-03 | 3,85E-02 | 0,43  | 1,35 |
| ENSG00000177469 | CAVIN1    | 3,23E-03 | 3,87E-02 | -0,27 | 0,83 |
| ENSG00000168036 | CTNNB1    | 3,24E-03 | 3,87E-02 | 0,15  | 1,11 |
| ENSG00000033178 | UBA6      | 3,24E-03 | 3,87E-02 | 0,19  | 1,14 |
| ENSG00000150977 | RILPL2    | 3,25E-03 | 3,87E-02 | -0,15 | 0,90 |
| ENSG00000146409 | SLC18B1   | 3,25E-03 | 3,87E-02 | 0,23  | 1,18 |
| ENSG00000120053 | GOT1      | 3,25E-03 | 3,87E-02 | 0,24  | 1,18 |
| ENSG00000175606 | TMEM70    | 3,25E-03 | 3,87E-02 | 0,30  | 1,23 |
| ENSG00000198435 | NRARP     | 3,26E-03 | 3,88E-02 | -0,44 | 0,74 |
| ENSG00000144791 | LIMD1     | 3,27E-03 | 3,88E-02 | -0,11 | 0,93 |
| ENSG00000120659 | TNFSF11   | 3,27E-03 | 3,89E-02 | 0,54  | 1,46 |
| ENSG00000166548 | TK2       | 3,28E-03 | 3,89E-02 | -0,23 | 0,85 |
| ENSG00000109118 | PHF12     | 3,28E-03 | 3,89E-02 | -0,16 | 0,90 |
| ENSG00000171017 | LRRC8E    | 3,28E-03 | 3,89E-02 | 0,78  | 1,72 |
| ENSG00000072310 | SREBF1    | 3,29E-03 | 3,89E-02 | -0,28 | 0,82 |
| ENSG00000106771 | TMEM245   | 3,30E-03 | 3,90E-02 | -0,20 | 0,87 |
| ENSG00000169612 | RAMAC     | 3,30E-03 | 3,91E-02 | 0,32  | 1,25 |
| ENSG00000109475 | RPL34     | 3,33E-03 | 3,94E-02 | 0,16  | 1,11 |
| ENSG00000166398 | KIAA0355  | 3,34E-03 | 3,94E-02 | -0,16 | 0,90 |
| ENSG00000178035 | IMPDH2    | 3,34E-03 | 3,94E-02 | 0,14  | 1,11 |
| ENSG00000019485 | PRDM11    | 3,36E-03 | 3,96E-02 | -0,26 | 0,83 |
| ENSG00000177076 | ACER2     | 3,37E-03 | 3,96E-02 | -0,39 | 0,76 |
| ENSG00000103494 | RPGRIP1L  | 3,37E-03 | 3,96E-02 | 0,31  | 1,24 |
| ENSG00000128266 | GNAZ      | 3,38E-03 | 3,98E-02 | -0,45 | 0,73 |

|                 |            |          |          |       |      |
|-----------------|------------|----------|----------|-------|------|
| ENSG00000108691 | CCL2       | 3,38E-03 | 3,98E-02 | -0,51 | 0,70 |
| ENSG00000144476 | ACKR3      | 3,40E-03 | 3,99E-02 | -0,40 | 0,76 |
| ENSG00000104897 | SF3A2      | 3,40E-03 | 3,99E-02 | -0,25 | 0,84 |
| ENSG00000011451 | WIZ        | 3,40E-03 | 3,99E-02 | -0,25 | 0,84 |
| ENSG00000235776 | AC000089.1 | 3,40E-03 | 3,99E-02 | 0,33  | 1,26 |
| ENSG00000183813 | CCR4       | 3,43E-03 | 4,01E-02 | 0,57  | 1,48 |
| ENSG00000138430 | OLA1       | 3,44E-03 | 4,03E-02 | 0,18  | 1,13 |
| ENSG00000117385 | P3H1       | 3,45E-03 | 4,03E-02 | 0,37  | 1,30 |
| ENSG00000175147 | TMEM51-AS1 | 3,46E-03 | 4,05E-02 | -0,45 | 0,73 |
| ENSG00000132676 | DAP3       | 3,47E-03 | 4,05E-02 | 0,12  | 1,09 |
| ENSG00000100678 | SLC8A3     | 3,51E-03 | 4,10E-02 | 0,58  | 1,50 |
| ENSG00000165655 | ZNF503     | 3,52E-03 | 4,10E-02 | -0,31 | 0,81 |
| ENSG00000004399 | PLXND1     | 3,52E-03 | 4,10E-02 | -0,24 | 0,85 |
| ENSG00000104635 | SLC39A14   | 3,53E-03 | 4,10E-02 | 0,47  | 1,38 |
| ENSG00000106351 | AGFG2      | 3,54E-03 | 4,11E-02 | -0,20 | 0,87 |
| ENSG00000137076 | TLN1       | 3,55E-03 | 4,12E-02 | -0,23 | 0,86 |
| ENSG00000119326 | CTNNAL1    | 3,55E-03 | 4,12E-02 | 0,19  | 1,14 |
| ENSG00000203709 | MIR29B2CHG | 3,56E-03 | 4,12E-02 | -0,38 | 0,77 |
| ENSG00000163125 | RPRD2      | 3,56E-03 | 4,12E-02 | -0,18 | 0,88 |
| ENSG00000150961 | SEC24D     | 3,56E-03 | 4,12E-02 | 0,36  | 1,28 |
| ENSG00000107104 | KANK1      | 3,56E-03 | 4,13E-02 | -0,31 | 0,81 |
| ENSG00000135446 | CDK4       | 3,57E-03 | 4,13E-02 | 0,14  | 1,10 |
| ENSG00000225774 | SIRPAP1    | 3,57E-03 | 4,13E-02 | -0,49 | 0,71 |
| ENSG00000186479 | RGS7BP     | 3,57E-03 | 4,13E-02 | -0,47 | 0,72 |
| ENSG00000144218 | AFF3       | 3,58E-03 | 4,13E-02 | -0,37 | 0,77 |
| ENSG00000181830 | SLC35C1    | 3,58E-03 | 4,13E-02 | -0,25 | 0,84 |
| ENSG00000111481 | COPZ1      | 3,58E-03 | 4,13E-02 | 0,12  | 1,09 |
| ENSG00000066455 | GOLGA5     | 3,58E-03 | 4,13E-02 | 0,13  | 1,09 |
| ENSG00000101335 | MYL9       | 3,59E-03 | 4,13E-02 | -0,35 | 0,78 |
| ENSG00000163359 | COL6A3     | 3,60E-03 | 4,14E-02 | 0,76  | 1,69 |
| ENSG00000179348 | GATA2      | 3,60E-03 | 4,14E-02 | -0,33 | 0,79 |
| ENSG00000163697 | APBB2      | 3,62E-03 | 4,16E-02 | -0,27 | 0,83 |
| ENSG00000159128 | IFNGR2     | 3,63E-03 | 4,16E-02 | 0,14  | 1,10 |
| ENSG00000101846 | STS        | 3,64E-03 | 4,17E-02 | -0,27 | 0,83 |
| ENSG00000141867 | BRD4       | 3,64E-03 | 4,17E-02 | -0,25 | 0,84 |
| ENSG00000165632 | TAF3       | 3,64E-03 | 4,17E-02 | -0,23 | 0,85 |
| ENSG00000164576 | SAP30L     | 3,65E-03 | 4,18E-02 | -0,15 | 0,90 |
| ENSG00000153283 | CD96       | 3,66E-03 | 4,18E-02 | 0,45  | 1,36 |
| ENSG00000104369 | JPH1       | 3,66E-03 | 4,19E-02 | -0,63 | 0,65 |
| ENSG00000171314 | PGAM1      | 3,67E-03 | 4,20E-02 | 0,34  | 1,26 |
| ENSG00000079435 | LIPE       | 3,70E-03 | 4,21E-02 | -0,82 | 0,57 |
| ENSG00000134644 | PUM1       | 3,70E-03 | 4,21E-02 | -0,12 | 0,92 |
| ENSG00000168679 | SLC16A4    | 3,70E-03 | 4,21E-02 | 0,30  | 1,23 |
| ENSG00000100473 | COCH       | 3,70E-03 | 4,21E-02 | 0,55  | 1,46 |
| ENSG00000162627 | SNX7       | 3,70E-03 | 4,21E-02 | 0,30  | 1,23 |
| ENSG00000163788 | SNRK       | 3,71E-03 | 4,22E-02 | -0,22 | 0,86 |
| ENSG00000146282 | RARS2      | 3,71E-03 | 4,22E-02 | 0,16  | 1,12 |
| ENSG00000188487 | INSC       | 3,72E-03 | 4,22E-02 | 0,42  | 1,34 |
| ENSG00000214226 | C17orf67   | 3,73E-03 | 4,23E-02 | -0,33 | 0,79 |
| ENSG00000101331 | CCM2L      | 3,73E-03 | 4,23E-02 | -0,31 | 0,81 |

|                 |            |          |          |       |      |
|-----------------|------------|----------|----------|-------|------|
| ENSG00000117091 | CD48       | 3,73E-03 | 4,23E-02 | 0,40  | 1,32 |
| ENSG00000149499 | EML3       | 3,75E-03 | 4,24E-02 | -0,17 | 0,89 |
| ENSG00000006530 | AGK        | 3,74E-03 | 4,24E-02 | 0,14  | 1,10 |
| ENSG00000135052 | GOLM1      | 3,75E-03 | 4,24E-02 | 0,41  | 1,33 |
| ENSG00000167157 | PRRX2      | 3,75E-03 | 4,24E-02 | 0,43  | 1,34 |
| ENSG00000179639 | FCER1A     | 3,76E-03 | 4,25E-02 | 0,35  | 1,27 |
| ENSG00000128908 | INO80      | 3,78E-03 | 4,26E-02 | -0,13 | 0,91 |
| ENSG00000113384 | GOLPH3     | 3,79E-03 | 4,28E-02 | 0,13  | 1,09 |
| ENSG00000068137 | PLEKHH3    | 3,80E-03 | 4,28E-02 | -0,21 | 0,87 |
| ENSG00000120278 | PLEKHG1    | 3,81E-03 | 4,29E-02 | -0,24 | 0,85 |
| ENSG00000008300 | CELSR3     | 3,82E-03 | 4,29E-02 | -0,38 | 0,77 |
| ENSG00000135063 | FAM189A2   | 3,82E-03 | 4,29E-02 | -0,33 | 0,80 |
| ENSG00000099814 | CEP170B    | 3,82E-03 | 4,29E-02 | -0,28 | 0,83 |
| ENSG00000115841 | RMDN2      | 3,82E-03 | 4,29E-02 | 0,23  | 1,17 |
| ENSG00000132849 | PATJ       | 3,85E-03 | 4,32E-02 | -0,20 | 0,87 |
| ENSG00000119705 | SLIRP      | 3,86E-03 | 4,33E-02 | 0,22  | 1,16 |
| ENSG00000238741 | SCARNA7    | 3,86E-03 | 4,33E-02 | 0,27  | 1,20 |
| ENSG00000164466 | SFXN1      | 3,88E-03 | 4,34E-02 | 0,19  | 1,14 |
| ENSG00000113140 | SPARC      | 3,87E-03 | 4,34E-02 | 0,65  | 1,57 |
| ENSG00000132394 | EEFSEC     | 3,89E-03 | 4,34E-02 | -0,23 | 0,85 |
| ENSG00000112877 | CEP72      | 3,90E-03 | 4,34E-02 | -0,33 | 0,79 |
| ENSG00000262049 | AC139530.2 | 3,89E-03 | 4,34E-02 | -0,28 | 0,83 |
| ENSG00000095380 | NANS       | 3,89E-03 | 4,34E-02 | 0,21  | 1,16 |
| ENSG00000124370 | MCEE       | 3,90E-03 | 4,34E-02 | 0,27  | 1,20 |
| ENSG00000136542 | GALNT5     | 3,89E-03 | 4,34E-02 | 0,44  | 1,35 |
| ENSG00000115129 | TP53I3     | 3,91E-03 | 4,35E-02 | 0,34  | 1,27 |
| ENSG00000047621 | C12orf4    | 3,92E-03 | 4,36E-02 | 0,20  | 1,15 |
| ENSG00000100027 | YPEL1      | 3,94E-03 | 4,38E-02 | -0,28 | 0,82 |
| ENSG00000183060 | LYSMD4     | 3,94E-03 | 4,38E-02 | -0,21 | 0,86 |
| ENSG00000182853 | VMO1       | 3,95E-03 | 4,38E-02 | 0,66  | 1,58 |
| ENSG00000079257 | LXN        | 3,96E-03 | 4,39E-02 | 0,35  | 1,27 |
| ENSG00000172061 | LRRC15     | 3,97E-03 | 4,41E-02 | 0,65  | 1,57 |
| ENSG00000096717 | SIRT1      | 3,98E-03 | 4,41E-02 | -0,16 | 0,89 |
| ENSG00000197756 | RPL37A     | 3,99E-03 | 4,41E-02 | 0,14  | 1,10 |
| ENSG00000071242 | RPS6KA2    | 4,00E-03 | 4,42E-02 | -0,18 | 0,88 |
| ENSG00000188626 | GOLGA8M    | 4,01E-03 | 4,43E-02 | -0,49 | 0,71 |
| ENSG00000123240 | OPTN       | 4,01E-03 | 4,43E-02 | -0,16 | 0,89 |
| ENSG00000123095 | BHLHE41    | 4,03E-03 | 4,45E-02 | -0,38 | 0,77 |
| ENSG00000109971 | HSPA8      | 4,03E-03 | 4,45E-02 | 0,22  | 1,16 |
| ENSG00000120697 | ALG5       | 4,03E-03 | 4,45E-02 | 0,22  | 1,16 |
| ENSG00000129682 | FGF13      | 4,04E-03 | 4,46E-02 | -0,47 | 0,72 |
| ENSG00000105323 | HNRNPUL1   | 4,07E-03 | 4,48E-02 | -0,16 | 0,89 |
| ENSG00000135070 | ISCA1      | 4,07E-03 | 4,48E-02 | 0,15  | 1,11 |
| ENSG00000155189 | AGPAT5     | 4,07E-03 | 4,48E-02 | 0,17  | 1,13 |
| ENSG00000164970 | FAM219A    | 4,08E-03 | 4,48E-02 | -0,20 | 0,87 |
| ENSG00000226200 | SGMS1-AS1  | 4,09E-03 | 4,49E-02 | -0,20 | 0,87 |
| ENSG00000084676 | NCOA1      | 4,09E-03 | 4,49E-02 | -0,12 | 0,92 |
| ENSG00000149600 | COMMD7     | 4,09E-03 | 4,49E-02 | 0,15  | 1,11 |
| ENSG00000114902 | SPCS1      | 4,10E-03 | 4,49E-02 | 0,18  | 1,13 |
| ENSG00000100243 | CYB5R3     | 4,11E-03 | 4,49E-02 | -0,25 | 0,84 |

|                 |            |          |          |       |      |
|-----------------|------------|----------|----------|-------|------|
| ENSG00000134375 | TIMM17A    | 4,11E-03 | 4,50E-02 | 0,19  | 1,14 |
| ENSG00000109083 | IFT20      | 4,12E-03 | 4,50E-02 | 0,24  | 1,18 |
| ENSG00000132932 | ATP8A2     | 4,12E-03 | 4,50E-02 | 0,50  | 1,41 |
| ENSG00000082458 | DLG3       | 4,12E-03 | 4,50E-02 | -0,21 | 0,86 |
| ENSG00000141448 | GATA6      | 4,13E-03 | 4,51E-02 | -0,63 | 0,65 |
| ENSG00000070444 | MNT        | 4,14E-03 | 4,52E-02 | -0,24 | 0,85 |
| ENSG00000139998 | RAB15      | 4,14E-03 | 4,52E-02 | 0,50  | 1,41 |
| ENSG00000185122 | HSF1       | 4,15E-03 | 4,52E-02 | -0,20 | 0,87 |
| ENSG00000082438 | COBLL1     | 4,17E-03 | 4,52E-02 | -0,34 | 0,79 |
| ENSG00000142676 | RPL11      | 4,16E-03 | 4,52E-02 | 0,11  | 1,08 |
| ENSG00000198498 | TMA16      | 4,17E-03 | 4,52E-02 | 0,23  | 1,17 |
| ENSG00000213189 | BTF3L4P2   | 4,17E-03 | 4,52E-02 | 0,32  | 1,24 |
| ENSG00000171368 | TPPP       | 4,19E-03 | 4,54E-02 | -0,57 | 0,68 |
| ENSG00000198899 | MT-ATP6    | 4,19E-03 | 4,54E-02 | -0,36 | 0,78 |
| ENSG00000171466 | ZNF562     | 4,19E-03 | 4,54E-02 | 0,13  | 1,09 |
| ENSG00000171700 | RGS19      | 4,20E-03 | 4,55E-02 | 0,24  | 1,18 |
| ENSG00000197694 | SPTAN1     | 4,22E-03 | 4,57E-02 | -0,15 | 0,90 |
| ENSG00000133401 | PDZD2      | 4,25E-03 | 4,60E-02 | -0,39 | 0,77 |
| ENSG00000172172 | MRPL13     | 4,26E-03 | 4,60E-02 | 0,23  | 1,17 |
| ENSG00000237172 | B3GNT9     | 4,26E-03 | 4,60E-02 | 0,44  | 1,36 |
| ENSG00000141905 | NFIC       | 4,27E-03 | 4,60E-02 | -0,32 | 0,80 |
| ENSG00000213047 | DENND1B    | 4,27E-03 | 4,60E-02 | 0,20  | 1,14 |
| ENSG00000134323 | MYCN       | 4,28E-03 | 4,61E-02 | -0,44 | 0,74 |
| ENSG00000141456 | PELP1      | 4,29E-03 | 4,61E-02 | -0,19 | 0,88 |
| ENSG00000242247 | ARFGAP3    | 4,29E-03 | 4,61E-02 | 0,20  | 1,15 |
| ENSG00000275385 | CCL18      | 4,29E-03 | 4,61E-02 | 1,16  | 2,24 |
| ENSG00000177595 | PIDD1      | 4,30E-03 | 4,62E-02 | -0,24 | 0,85 |
| ENSG00000135924 | DNAJB2     | 4,31E-03 | 4,63E-02 | -0,16 | 0,90 |
| ENSG00000065135 | GNAI3      | 4,31E-03 | 4,63E-02 | 0,15  | 1,11 |
| ENSG00000247134 | AC090204.1 | 4,31E-03 | 4,63E-02 | 0,53  | 1,45 |
| ENSG00000167283 | ATP5MG     | 4,32E-03 | 4,63E-02 | 0,19  | 1,14 |
| ENSG00000166473 | PKD1L2     | 4,33E-03 | 4,63E-02 | -0,82 | 0,57 |
| ENSG00000181234 | TMEM132C   | 4,33E-03 | 4,63E-02 | -0,52 | 0,70 |
| ENSG00000065911 | MTHFD2     | 4,33E-03 | 4,63E-02 | 0,29  | 1,22 |
| ENSG00000101605 | MYOM1      | 4,34E-03 | 4,64E-02 | -0,47 | 0,72 |
| ENSG00000181929 | PRKAG1     | 4,35E-03 | 4,64E-02 | 0,15  | 1,11 |
| ENSG00000103528 | SYT17      | 4,36E-03 | 4,66E-02 | -0,33 | 0,80 |
| ENSG00000196810 | CTBP1-DT   | 4,36E-03 | 4,66E-02 | -0,18 | 0,88 |
| ENSG00000171962 | DRC3       | 4,38E-03 | 4,67E-02 | -0,37 | 0,77 |
| ENSG00000157020 | SEC13      | 4,40E-03 | 4,68E-02 | 0,21  | 1,15 |
| ENSG00000138792 | ENPEP      | 4,40E-03 | 4,68E-02 | 0,34  | 1,27 |
| ENSG00000137693 | YAP1       | 4,41E-03 | 4,68E-02 | -0,28 | 0,82 |
| ENSG00000106153 | CHCHD2     | 4,41E-03 | 4,68E-02 | 0,15  | 1,11 |
| ENSG00000116793 | PHTF1      | 4,41E-03 | 4,68E-02 | 0,23  | 1,17 |
| ENSG00000137563 | GGH        | 4,41E-03 | 4,68E-02 | 0,32  | 1,25 |
| ENSG00000117298 | ECE1       | 4,42E-03 | 4,69E-02 | -0,22 | 0,86 |
| ENSG00000175324 | LSM1       | 4,42E-03 | 4,69E-02 | 0,23  | 1,17 |
| ENSG00000130935 | NOL11      | 4,43E-03 | 4,69E-02 | 0,12  | 1,09 |
| ENSG00000133142 | TCEAL4     | 4,44E-03 | 4,70E-02 | 0,17  | 1,12 |
| ENSG00000168653 | NDUFS5     | 4,45E-03 | 4,71E-02 | 0,15  | 1,11 |

|                 |            |          |          |       |      |
|-----------------|------------|----------|----------|-------|------|
| ENSG00000142039 | CCDC97     | 4,45E-03 | 4,71E-02 | -0,20 | 0,87 |
| ENSG00000167748 | KLK1       | 4,47E-03 | 4,72E-02 | -0,59 | 0,66 |
| ENSG00000100226 | GTPBP1     | 4,47E-03 | 4,72E-02 | -0,16 | 0,89 |
| ENSG00000111319 | SCNN1A     | 4,50E-03 | 4,72E-02 | -0,77 | 0,58 |
| ENSG00000105997 | HOXA3      | 4,51E-03 | 4,72E-02 | -0,42 | 0,75 |
| ENSG00000175662 | TOM1L2     | 4,47E-03 | 4,72E-02 | -0,19 | 0,88 |
| ENSG00000116198 | CEP104     | 4,49E-03 | 4,72E-02 | -0,15 | 0,90 |
| ENSG00000065029 | ZNF76      | 4,50E-03 | 4,72E-02 | -0,15 | 0,90 |
| ENSG00000100207 | TCF20      | 4,49E-03 | 4,72E-02 | -0,14 | 0,91 |
| ENSG00000218426 | AL590867.2 | 4,49E-03 | 4,72E-02 | 0,17  | 1,12 |
| ENSG00000167842 | MIS12      | 4,50E-03 | 4,72E-02 | 0,17  | 1,12 |
| ENSG00000111845 | PAK1IP1    | 4,48E-03 | 4,72E-02 | 0,20  | 1,14 |
| ENSG00000101347 | SAMHD1     | 4,48E-03 | 4,72E-02 | 0,21  | 1,16 |
| ENSG00000271270 | TMCC1-AS1  | 4,51E-03 | 4,72E-02 | 0,37  | 1,29 |
| ENSG00000134824 | FADS2      | 4,51E-03 | 4,72E-02 | 0,38  | 1,30 |
| ENSG00000149090 | PAMR1      | 4,48E-03 | 4,72E-02 | 0,45  | 1,36 |
| ENSG00000130940 | CASZ1      | 4,53E-03 | 4,73E-02 | -0,30 | 0,81 |
| ENSG00000102882 | MAPK3      | 4,53E-03 | 4,73E-02 | -0,24 | 0,85 |
| ENSG00000198909 | MAP3K3     | 4,52E-03 | 4,73E-02 | -0,13 | 0,91 |
| ENSG00000116774 | OLFML3     | 4,52E-03 | 4,73E-02 | 0,29  | 1,23 |
| ENSG00000219626 | FAM228B    | 4,53E-03 | 4,73E-02 | -0,23 | 0,85 |
| ENSG00000143367 | TUFT1      | 4,54E-03 | 4,73E-02 | -0,38 | 0,77 |
| ENSG00000130584 | ZBTB46     | 4,54E-03 | 4,73E-02 | -0,26 | 0,84 |
| ENSG00000170606 | HSPA4      | 4,57E-03 | 4,76E-02 | 0,15  | 1,11 |
| ENSG00000224831 | TMEM183B   | 4,57E-03 | 4,76E-02 | 0,24  | 1,18 |
| ENSG00000065485 | PDIA5      | 4,58E-03 | 4,76E-02 | 0,29  | 1,22 |
| ENSG00000135093 | USP30      | 4,61E-03 | 4,79E-02 | -0,21 | 0,86 |
| ENSG00000214194 | SMIM30     | 4,61E-03 | 4,79E-02 | 0,27  | 1,21 |
| ENSG00000010404 | IDS        | 4,61E-03 | 4,79E-02 | -0,20 | 0,87 |
| ENSG00000116194 | ANGPTL1    | 4,61E-03 | 4,79E-02 | 0,65  | 1,57 |
| ENSG00000055147 | FAM114A2   | 4,62E-03 | 4,79E-02 | 0,15  | 1,11 |
| ENSG00000186716 | BCR        | 4,63E-03 | 4,79E-02 | -0,22 | 0,86 |
| ENSG00000174231 | PRPF8      | 4,64E-03 | 4,80E-02 | -0,19 | 0,87 |
| ENSG00000162104 | ADCY9      | 4,64E-03 | 4,80E-02 | -0,18 | 0,88 |
| ENSG00000118785 | SPP1       | 4,65E-03 | 4,81E-02 | 0,44  | 1,36 |
| ENSG00000144908 | ALDH1L1    | 4,65E-03 | 4,81E-02 | -0,53 | 0,69 |
| ENSG00000272734 | ADIRF-AS1  | 4,66E-03 | 4,81E-02 | -0,35 | 0,78 |
| ENSG00000126001 | CEP250     | 4,66E-03 | 4,81E-02 | -0,15 | 0,90 |
| ENSG00000107738 | VSIR       | 4,66E-03 | 4,81E-02 | -0,21 | 0,86 |
| ENSG00000166562 | SEC11C     | 4,67E-03 | 4,81E-02 | 0,26  | 1,20 |
| ENSG00000089159 | PXN        | 4,73E-03 | 4,87E-02 | -0,19 | 0,88 |
| ENSG00000068615 | REEP1      | 4,73E-03 | 4,87E-02 | 0,50  | 1,41 |
| ENSG00000213949 | ITGA1      | 4,75E-03 | 4,89E-02 | -0,30 | 0,81 |
| ENSG00000131018 | SYNE1      | 4,76E-03 | 4,89E-02 | -0,17 | 0,89 |
| ENSG00000236801 | RPL24P8    | 4,76E-03 | 4,89E-02 | 0,19  | 1,14 |
| ENSG00000136514 | RTP4       | 4,77E-03 | 4,90E-02 | 0,29  | 1,22 |
| ENSG00000142149 | HUNK       | 4,79E-03 | 4,91E-02 | 0,77  | 1,71 |
| ENSG00000100209 | HSCB       | 4,79E-03 | 4,92E-02 | 0,29  | 1,22 |
| ENSG00000198786 | MT-ND5     | 4,80E-03 | 4,92E-02 | -0,42 | 0,75 |
| ENSG00000129474 | AJUBA      | 4,81E-03 | 4,92E-02 | -0,23 | 0,85 |

|                 |            |          |          |       |      |
|-----------------|------------|----------|----------|-------|------|
| ENSG00000239697 | TNFSF12    | 4,81E-03 | 4,92E-02 | -0,23 | 0,85 |
| ENSG00000198742 | SMURF1     | 4,82E-03 | 4,93E-02 | -0,15 | 0,90 |
| ENSG00000100151 | PICK1      | 4,84E-03 | 4,94E-02 | -0,19 | 0,88 |
| ENSG00000182473 | EXOC7      | 4,84E-03 | 4,95E-02 | -0,10 | 0,94 |
| ENSG00000135452 | TSPAN31    | 4,84E-03 | 4,95E-02 | 0,14  | 1,10 |
| ENSG00000175727 | MLXIP      | 4,86E-03 | 4,95E-02 | -0,20 | 0,87 |
| ENSG00000228328 | AL158201.1 | 4,86E-03 | 4,95E-02 | 0,34  | 1,27 |
| ENSG00000103932 | RPAP1      | 4,88E-03 | 4,96E-02 | -0,22 | 0,86 |
| ENSG00000156521 | TYSND1     | 4,88E-03 | 4,96E-02 | -0,21 | 0,87 |
| ENSG00000158828 | PINK1      | 4,87E-03 | 4,96E-02 | -0,16 | 0,89 |
| ENSG00000123349 | PFDN5      | 4,88E-03 | 4,96E-02 | 0,11  | 1,08 |
| ENSG00000198947 | DMD        | 4,89E-03 | 4,97E-02 | -0,50 | 0,71 |
| ENSG00000179832 | MROH1      | 4,91E-03 | 4,98E-02 | -0,16 | 0,89 |
| ENSG00000172315 | TP53RK     | 4,91E-03 | 4,98E-02 | 0,17  | 1,13 |
| ENSG00000173917 | HOXB2      | 4,91E-03 | 4,98E-02 | 0,43  | 1,35 |
| ENSG00000160888 | IER2       | 4,92E-03 | 4,99E-02 | -0,51 | 0,70 |
| ENSG00000007516 | BAIAP3     | 4,93E-03 | 4,99E-02 | -0,50 | 0,71 |
| ENSG00000165072 | MAMDC2     | 4,93E-03 | 4,99E-02 | 0,39  | 1,31 |
| ENSG00000142632 | ARHGEF19   | 4,93E-03 | 4,99E-02 | 0,32  | 1,25 |
| ENSG00000103264 | FBXO31     | 4,94E-03 | 4,99E-02 | -0,23 | 0,85 |
| ENSG00000100403 | ZC3H7B     | 4,95E-03 | 4,99E-02 | -0,16 | 0,89 |
| ENSG00000198001 | IRAK4      | 4,95E-03 | 4,99E-02 | 0,17  | 1,13 |
| ENSG00000007264 | MATK       | 4,94E-03 | 4,99E-02 | 0,43  | 1,35 |
