# Supplementary material for: RNA Sequencing Reveals Interacting Key Determinants of Osteoarthritis Acting in Subchondral Bone and Articular Cartilage: Identification of IL11 and CHADL as Attractive Treatment Targets
Source: PubMed Central journal article supplement — Arthritis Rheumatol. 2021 Mar 21;73(5):789–99. doi: 10.1002/art.41600 (PMC8252798; doi:10.1002/art.41600), 2021-03-21
Supplement: ART-73-789-s009.pdf [file ART-73-789-s009.pdf]

**Supplementary table 7** - Overlapping differentially expressed genes between the subchondral bone and the articular cartilage with opposite direction of effect

| Ensembl ID      | Gene name | Subchondral bone |          | Articular Cartilage |          |
|-----------------|-----------|------------------|----------|---------------------|----------|
|                 |           | Fold change      | FDR      | Fold change         | FDR      |
| ENSG00000074181 | NOTCH3    | 0,70             | 1,44E-03 | 2,03                | 1,13E-03 |
| ENSG00000081277 | PKP1      | 0,57             | 5,32E-03 | 1,62                | 4,84E-03 |
| ENSG00000082175 | PGR       | 0,73             | 2,79E-02 | 1,49                | 2,02E-02 |
| ENSG00000088387 | DOCK9     | 0,88             | 2,90E-02 | 1,32                | 2,17E-02 |
| ENSG00000100234 | TIMP3     | 0,70             | 4,39E-03 | 1,54                | 9,97E-06 |
| ENSG00000103528 | SYT17     | 0,80             | 4,66E-02 | 1,21                | 2,56E-02 |
| ENSG00000109846 | CRYAB     | 0,67             | 2,83E-02 | 1,32                | 6,16E-03 |
| ENSG00000110092 | CCND1     | 0,84             | 3,29E-02 | 1,63                | 1,14E-04 |
| ENSG00000119185 | ITGB1BP1  | 0,81             | 2,45E-02 | 1,22                | 5,71E-04 |
| ENSG00000120278 | PLEKHG1   | 0,85             | 4,29E-02 | 1,77                | 7,93E-04 |
| ENSG00000120318 | ARAP3     | 0,85             | 3,56E-03 | 1,34                | 4,38E-03 |
| ENSG00000144476 | ACKR3     | 0,76             | 3,99E-02 | 1,34                | 7,96E-03 |
| ENSG00000145911 | N4BP3     | 0,68             | 1,92E-03 | 2,18                | 3,27E-03 |
| ENSG00000146674 | IGFBP3    | 0,78             | 2,63E-02 | 2,65                | 1,12E-07 |
| ENSG00000156453 | PCDH1     | 0,82             | 2,19E-02 | 1,91                | 4,02E-05 |
| ENSG00000157510 | AFAP1L1   | 0,80             | 1,93E-02 | 2,08                | 9,44E-04 |
| ENSG00000157617 | C2CD2     | 0,74             | 2,45E-02 | 1,28                | 1,98E-03 |
| ENSG00000158258 | CLSTN2    | 0,66             | 6,38E-03 | 1,83                | 1,40E-02 |
| ENSG00000173210 | ABLIM3    | 0,76             | 3,70E-03 | 1,98                | 9,31E-06 |
| ENSG00000173599 | PC        | 0,83             | 3,60E-02 | 1,25                | 3,51E-03 |
| ENSG00000197183 | NOL4L     | 0,84             | 2,56E-02 | 1,25                | 1,02E-03 |
| ENSG00000198517 | MAFK      | 0,86             | 2,43E-02 | 1,35                | 4,36E-03 |
| ENSG00000198742 | SMURF1    | 0,90             | 4,93E-02 | 1,55                | 3,32E-07 |
| ENSG00000205336 | ADGRG1    | 0,78             | 3,59E-02 | 1,73                | 1,39E-03 |
| ENSG00000052850 | ALX4      | 2,08             | 2,30E-03 | 0,55                | 2,75E-02 |
| ENSG00000099284 | H2AFY2    | 1,23             | 2,32E-02 | 0,85                | 2,07E-02 |
| ENSG00000106066 | CPVL      | 1,26             | 8,94E-03 | 0,53                | 9,16E-03 |
| ENSG00000144649 | GASK1A    | 1,48             | 1,49E-02 | 0,54                | 1,86E-03 |
| ENSG00000165973 | NELL1     | 1,74             | 3,11E-02 | 0,47                | 2,05E-02 |
| ENSG00000182326 | C1S       | 1,29             | 1,37E-02 | 0,77                | 7,74E-03 |
| ENSG00000182853 | VMO1      | 1,58             | 4,38E-02 | 0,53                | 1,63E-03 |
| ENSG00000264672 | SEPT4-AS1 | 1,44             | 2,30E-02 | 0,60                | 1,94E-02 |
