# Supplementary material for: RNA Sequencing Reveals Interacting Key Determinants of Osteoarthritis Acting in Subchondral Bone and Articular Cartilage: Identification of IL11 and CHADL as Attractive Treatment Targets
Source: PubMed Central journal article supplement — Arthritis Rheumatol. 2021 Mar 21;73(5):789–99. doi: 10.1002/art.41600 (PMC8252798; doi:10.1002/art.41600), 2021-03-21
Supplement: ART-73-789-s012.pdf [file ART-73-789-s012.pdf]

**Supplementary table 6** - Overlapping differentially expressed genes between the subchondral bone and the articular cartilage with similar direction of effect

| Ensembl ID      | Gene name | Subchondral bone |          | Articular Cartilage |          |
|-----------------|-----------|------------------|----------|---------------------|----------|
|                 |           | Fold change      | FDR      | Fold change         | FDR      |
| ENSG0000002745  | WNT16     | 4,35             | 6,88E-04 | 8,48                | 1,10E-13 |
| ENSG0000005059  | MCUB      | 1,20             | 3,77E-02 | 1,48                | 1,65E-04 |
| ENSG0000006016  | CRLF1     | 2,32             | 2,86E-02 | 3,04                | 2,96E-10 |
| ENSG0000006327  | TNFRSF12A | 1,50             | 2,31E-02 | 2,68                | 1,14E-08 |
| ENSG00000038427 | VCAN      | 1,53             | 6,51E-03 | 2,06                | 5,57E-06 |
| ENSG00000039560 | RAI14     | 1,18             | 2,44E-02 | 1,73                | 5,56E-06 |
| ENSG00000050165 | DKK3      | 1,51             | 1,67E-02 | 1,60                | 4,51E-04 |
| ENSG00000055163 | CYFIP2    | 1,27             | 2,14E-02 | 2,05                | 9,36E-08 |
| ENSG00000058262 | SEC61A1   | 1,19             | 1,68E-02 | 1,13                | 1,92E-03 |
| ENSG00000066697 | MSANTD3   | 1,30             | 2,28E-02 | 1,38                | 2,03E-02 |
| ENSG00000069849 | ATP1B3    | 1,29             | 6,54E-03 | 1,28                | 9,39E-03 |
| ENSG00000070669 | ASNS      | 1,34             | 1,81E-03 | 1,31                | 1,29E-02 |
| ENSG00000070882 | OSBPL3    | 1,20             | 8,66E-03 | 1,63                | 7,32E-04 |
| ENSG00000074695 | LMAN1     | 1,20             | 3,86E-03 | 1,37                | 6,77E-03 |
| ENSG00000075651 | PLD1      | 1,15             | 1,72E-02 | 1,68                | 3,14E-05 |
| ENSG00000077092 | RARB      | 1,26             | 1,98E-02 | 1,69                | 1,13E-04 |
| ENSG00000078098 | FAP       | 2,05             | 1,14E-02 | 1,69                | 1,09E-03 |
| ENSG00000082153 | BZW1      | 1,18             | 3,07E-02 | 1,36                | 1,91E-02 |
| ENSG00000086598 | TMED2     | 1,18             | 1,66E-03 | 1,22                | 4,85E-02 |
| ENSG00000089685 | BIRC5     | 1,59             | 3,77E-02 | 2,30                | 2,12E-03 |
| ENSG00000090520 | DNAJB11   | 1,16             | 1,86E-02 | 1,39                | 3,14E-05 |
| ENSG00000090530 | P3H2      | 1,37             | 1,14E-02 | 3,23                | 4,71E-18 |
| ENSG00000093167 | LRRFIP2   | 1,24             | 3,81E-03 | 1,37                | 7,76E-06 |
| ENSG00000095752 | IL11      | 4,16             | 2,44E-03 | 22,80               | 1,53E-20 |
| ENSG00000095777 | MYO3A     | 2,44             | 1,27E-02 | 2,25                | 1,16E-04 |
| ENSG00000099194 | SCD       | 1,50             | 2,54E-02 | 1,27                | 2,70E-02 |
| ENSG00000100473 | COCH      | 1,46             | 4,21E-02 | 3,30                | 1,01E-08 |
| ENSG00000103942 | HOMER2    | 1,32             | 2,33E-02 | 1,93                | 2,20E-06 |
| ENSG00000104415 | CCN4      | 1,58             | 5,46E-03 | 1,92                | 4,06E-05 |
| ENSG00000104635 | SLC39A14  | 1,38             | 4,10E-02 | 1,65                | 4,42E-07 |
| ENSG00000104723 | TUSC3     | 1,25             | 2,99E-02 | 1,18                | 4,17E-02 |
| ENSG00000106105 | GARS      | 1,25             | 9,60E-03 | 1,30                | 1,54E-03 |
| ENSG00000106809 | OGN       | 3,43             | 4,62E-03 | 2,00                | 1,02E-03 |
| ENSG00000106819 | ASPN      | 3,17             | 3,56E-03 | 1,65                | 3,04E-02 |
| ENSG00000107249 | GLIS3     | 1,45             | 5,95E-03 | 1,88                | 1,02E-05 |
| ENSG00000108039 | XPNPEP1   | 1,13             | 2,30E-02 | 1,20                | 5,03E-03 |
| ENSG00000111669 | TPI1      | 1,20             | 2,01E-02 | 1,25                | 3,54E-03 |
| ENSG00000112210 | RAB23     | 1,25             | 9,60E-03 | 1,56                | 3,22E-04 |
| ENSG00000112394 | SLC16A10  | 1,74             | 3,55E-02 | 1,68                | 3,28E-05 |
| ENSG00000112984 | KIF20A    | 1,97             | 2,22E-02 | 1,59                | 4,44E-02 |
| ENSG00000113273 | ARSB      | 1,31             | 2,88E-02 | 1,37                | 2,78E-04 |
| ENSG00000113407 | TARS      | 1,17             | 1,40E-02 | 1,24                | 3,56E-02 |

|                 |          |      |          |      |          |
|-----------------|----------|------|----------|------|----------|
| ENSG00000113448 | PDE4D    | 1,19 | 3,26E-02 | 1,43 | 5,18E-03 |
| ENSG00000113732 | ATP6V0E1 | 1,25 | 2,44E-03 | 1,26 | 3,98E-02 |
| ENSG00000114541 | FRMD4B   | 1,14 | 1,26E-02 | 1,26 | 2,08E-02 |
| ENSG00000114999 | TTL      | 1,16 | 1,02E-02 | 1,27 | 7,70E-04 |
| ENSG00000116793 | PHTF1    | 1,17 | 4,68E-02 | 1,31 | 4,71E-05 |
| ENSG00000117410 | ATP6V0B  | 1,26 | 1,18E-02 | 1,38 | 4,03E-03 |
| ENSG00000118515 | SGK1     | 1,21 | 2,43E-02 | 2,10 | 7,52E-07 |
| ENSG00000118785 | SPP1     | 1,36 | 4,81E-02 | 3,14 | 8,98E-07 |
| ENSG00000118849 | RARRES1  | 1,77 | 2,50E-03 | 1,53 | 9,99E-03 |
| ENSG00000120149 | MSX2     | 1,64 | 3,13E-02 | 2,44 | 2,45E-05 |
| ENSG00000120254 | MTHFD1L  | 1,35 | 8,59E-03 | 1,73 | 3,77E-08 |
| ENSG00000120659 | TNFSF11  | 1,46 | 3,89E-02 | 2,40 | 2,83E-07 |
| ENSG00000123610 | TNFAIP6  | 1,93 | 1,03E-03 | 3,58 | 2,48E-08 |
| ENSG00000124172 | ATP5F1E  | 1,17 | 3,56E-03 | 1,37 | 4,54E-02 |
| ENSG00000125144 | MT1G     | 2,16 | 2,50E-02 | 1,97 | 1,72E-04 |
| ENSG00000127080 | IPPK     | 1,18 | 3,11E-02 | 1,42 | 3,51E-06 |
| ENSG00000127083 | OMD      | 1,57 | 2,72E-02 | 1,79 | 1,12E-02 |
| ENSG00000128595 | CALU     | 1,30 | 6,52E-03 | 1,41 | 2,07E-02 |
| ENSG00000131480 | AOC2     | 1,38 | 1,47E-02 | 2,23 | 3,57E-10 |
| ENSG00000132646 | PCNA     | 1,20 | 7,06E-03 | 1,23 | 4,59E-02 |
| ENSG00000133110 | POSTN    | 2,04 | 3,44E-02 | 2,06 | 3,20E-02 |
| ENSG00000134121 | CHL1     | 1,18 | 3,30E-02 | 2,30 | 4,74E-02 |
| ENSG00000134198 | TSPAN2   | 1,64 | 1,51E-02 | 2,42 | 1,51E-08 |
| ENSG00000134259 | NGF      | 1,36 | 3,26E-02 | 4,91 | 2,53E-14 |
| ENSG00000134824 | FADS2    | 1,30 | 4,72E-02 | 1,29 | 5,26E-03 |
| ENSG00000134851 | TMEM165  | 1,14 | 3,53E-02 | 1,20 | 3,14E-02 |
| ENSG00000135148 | TRAFD1   | 1,13 | 2,72E-02 | 1,20 | 7,07E-03 |
| ENSG00000135404 | CD63     | 1,18 | 3,08E-03 | 1,30 | 4,17E-02 |
| ENSG00000136010 | ALDH1L2  | 1,38 | 2,48E-02 | 1,28 | 4,44E-02 |
| ENSG00000136052 | SLC41A2  | 1,27 | 2,00E-02 | 1,37 | 2,09E-02 |
| ENSG00000136261 | BZW2     | 1,23 | 5,92E-03 | 1,25 | 3,18E-02 |
| ENSG00000136628 | EPRS     | 1,15 | 1,10E-02 | 1,26 | 4,42E-02 |
| ENSG00000136731 | UGGT1    | 1,11 | 3,49E-02 | 1,21 | 1,82E-03 |
| ENSG00000137269 | LRRC1    | 1,15 | 3,31E-02 | 1,63 | 7,10E-13 |
| ENSG00000137563 | GGH      | 1,25 | 4,68E-02 | 1,36 | 2,29E-02 |
| ENSG00000138018 | SELENOI  | 1,18 | 3,54E-02 | 1,44 | 9,95E-03 |
| ENSG00000139173 | TMEM117  | 1,31 | 8,59E-03 | 1,29 | 6,61E-03 |
| ENSG00000139329 | LUM      | 1,73 | 1,03E-02 | 1,57 | 1,32E-02 |
| ENSG00000139998 | RAB15    | 1,41 | 4,52E-02 | 1,28 | 2,65E-02 |
| ENSG00000140367 | UBE2Q2   | 1,17 | 3,04E-02 | 1,22 | 3,44E-02 |
| ENSG00000140470 | ADAMTS17 | 1,31 | 2,56E-02 | 1,34 | 1,61E-02 |
| ENSG00000142149 | HUNK     | 1,71 | 4,91E-02 | 1,94 | 1,04E-03 |
| ENSG00000143061 | IGSF3    | 1,71 | 1,92E-02 | 1,53 | 2,50E-04 |
| ENSG00000144867 | SRPRB    | 1,36 | 1,89E-04 | 1,21 | 2,29E-02 |
| ENSG00000145050 | MANF     | 1,32 | 1,27E-02 | 1,40 | 6,12E-03 |
| ENSG00000145685 | LHFPL2   | 1,32 | 3,70E-03 | 1,29 | 2,92E-02 |
| ENSG00000146386 | ABRACL   | 1,39 | 9,31E-03 | 1,44 | 3,05E-02 |

|                 |         |      |          |      |          |
|-----------------|---------|------|----------|------|----------|
| ENSG00000147036 | LANCL3  | 1,42 | 2,22E-02 | 1,84 | 3,79E-03 |
| ENSG00000148248 | SURF4   | 1,18 | 1,46E-02 | 1,19 | 4,58E-04 |
| ENSG00000148344 | PTGES   | 1,64 | 1,63E-02 | 3,06 | 3,61E-12 |
| ENSG00000148672 | GLUD1   | 1,10 | 1,98E-02 | 1,15 | 2,97E-02 |
| ENSG00000148848 | ADAM12  | 1,75 | 1,11E-03 | 1,98 | 1,85E-04 |
| ENSG00000149090 | PAMR1   | 1,36 | 4,72E-02 | 1,96 | 1,74E-06 |
| ENSG00000149380 | P4HA3   | 2,05 | 1,12E-03 | 1,84 | 1,49E-05 |
| ENSG00000151025 | GPR158  | 2,31 | 6,88E-04 | 2,73 | 3,63E-03 |
| ENSG00000151150 | ANK3    | 1,30 | 3,68E-02 | 2,62 | 6,02E-10 |
| ENSG00000152661 | GJA1    | 1,47 | 1,40E-02 | 1,43 | 3,53E-02 |
| ENSG00000153707 | PTPRD   | 1,47 | 1,54E-03 | 1,37 | 1,10E-02 |
| ENSG00000153993 | SEMA3D  | 1,70 | 1,92E-03 | 1,75 | 8,86E-05 |
| ENSG00000154153 | RETREG1 | 1,38 | 9,13E-03 | 1,52 | 3,08E-06 |
| ENSG00000154473 | BUB3    | 1,12 | 5,92E-03 | 1,19 | 4,52E-02 |
| ENSG00000155189 | AGPAT5  | 1,13 | 4,48E-02 | 1,29 | 4,84E-02 |
| ENSG00000156466 | GDF6    | 3,67 | 2,02E-02 | 1,58 | 3,19E-02 |
| ENSG00000157680 | DGKI    | 1,44 | 1,50E-02 | 2,07 | 5,49E-05 |
| ENSG00000159200 | RCAN1   | 1,35 | 4,94E-03 | 1,72 | 1,54E-04 |
| ENSG00000160752 | FDPS    | 1,12 | 3,82E-02 | 1,25 | 7,26E-03 |
| ENSG00000162627 | SNX7    | 1,23 | 4,21E-02 | 1,45 | 5,67E-03 |
| ENSG00000163359 | COL6A3  | 1,69 | 4,14E-02 | 1,75 | 2,28E-05 |
| ENSG00000163430 | FSTL1   | 1,30 | 1,52E-02 | 1,32 | 3,48E-03 |
| ENSG00000163902 | RPN1    | 1,15 | 1,12E-03 | 1,15 | 2,32E-02 |
| ENSG00000164023 | SGMS2   | 1,62 | 5,46E-03 | 1,48 | 2,13E-03 |
| ENSG00000164294 | GPX8    | 1,38 | 9,41E-03 | 1,30 | 1,65E-02 |
| ENSG00000164405 | UQCRCQ  | 1,21 | 4,67E-03 | 1,34 | 4,07E-02 |
| ENSG00000166033 | HTRA1   | 1,73 | 1,57E-02 | 2,39 | 1,65E-11 |
| ENSG00000166562 | SEC11C  | 1,20 | 4,81E-02 | 1,34 | 1,10E-02 |
| ENSG00000166986 | MARS    | 1,14 | 3,20E-02 | 1,29 | 2,18E-05 |
| ENSG00000167306 | MYO5B   | 1,56 | 3,07E-02 | 1,57 | 9,28E-04 |
| ENSG00000169231 | THBS3   | 1,39 | 3,44E-02 | 1,64 | 2,76E-06 |
| ENSG00000169884 | WNT10B  | 1,49 | 3,25E-02 | 3,47 | 1,52E-06 |
| ENSG00000170801 | HTRA3   | 1,65 | 1,03E-02 | 1,30 | 3,65E-02 |
| ENSG00000171017 | LRRRC8E | 1,72 | 3,89E-02 | 1,99 | 1,11E-04 |
| ENSG00000171241 | SHCBP1  | 1,48 | 3,43E-02 | 1,73 | 2,94E-03 |
| ENSG00000171314 | PGAM1   | 1,26 | 4,20E-02 | 1,42 | 2,29E-03 |
| ENSG00000171793 | CTPS1   | 1,29 | 3,42E-02 | 1,32 | 5,97E-03 |
| ENSG00000173692 | PSMD1   | 1,11 | 2,83E-02 | 1,32 | 1,43E-02 |
| ENSG00000173917 | HOXB2   | 1,35 | 4,98E-02 | 2,16 | 3,99E-04 |
| ENSG00000174851 | YIF1A   | 1,16 | 3,81E-02 | 1,25 | 6,08E-03 |
| ENSG00000175324 | LSM1    | 1,17 | 4,69E-02 | 1,23 | 2,25E-02 |
| ENSG00000178752 | ERFE    | 1,87 | 1,63E-02 | 3,44 | 8,82E-12 |
| ENSG00000180447 | GAS1    | 1,33 | 3,74E-02 | 1,38 | 3,13E-03 |
| ENSG00000182220 | ATP6AP2 | 1,16 | 1,11E-02 | 1,37 | 6,13E-03 |
| ENSG00000183255 | PTTG1IP | 1,17 | 7,53E-03 | 1,15 | 4,54E-03 |
| ENSG00000185483 | ROR1    | 1,23 | 3,85E-02 | 1,77 | 3,21E-04 |
| ENSG00000196154 | S100A4  | 1,28 | 2,00E-02 | 1,83 | 2,79E-04 |

|                 |            |      |          |      |          |
|-----------------|------------|------|----------|------|----------|
| ENSG00000196305 | IARS       | 1,21 | 4,28E-03 | 1,32 | 2,85E-03 |
| ENSG00000196352 | CD55       | 1,46 | 2,48E-02 | 2,96 | 1,05E-14 |
| ENSG00000198018 | ENTPD7     | 1,35 | 1,73E-02 | 1,52 | 3,21E-03 |
| ENSG00000198729 | PPP1R14C   | 2,19 | 1,14E-02 | 2,52 | 1,33E-11 |
| ENSG00000198856 | OSTC       | 1,46 | 1,44E-03 | 1,48 | 1,02E-02 |
| ENSG00000213694 | S1PR3      | 1,62 | 6,00E-03 | 1,48 | 9,26E-03 |
| ENSG00000230148 | HOXB-AS1   | 2,00 | 1,27E-02 | 1,64 | 4,86E-02 |
| ENSG00000238741 | SCARNA7    | 1,20 | 4,33E-02 | 2,37 | 1,10E-02 |
| ENSG00000247134 | AC090204.1 | 1,45 | 4,63E-02 | 2,13 | 3,54E-02 |
| ENSG00000252010 | SCARNA5    | 1,15 | 3,80E-02 | 2,25 | 4,08E-03 |
| ENSG00000252835 | SCARNA21   | 1,29 | 7,33E-04 | 1,59 | 1,64E-02 |
| ENSG00000263934 | SNORD3A    | 1,27 | 2,01E-02 | 1,43 | 1,03E-02 |
| ENSG00000272398 | CD24       | 1,42 | 1,87E-02 | 1,93 | 1,90E-03 |
| ENSG00000004399 | PLXND1     | 0,85 | 4,10E-02 | 0,74 | 3,48E-03 |
| ENSG00000005379 | TSPOAP1    | 0,80 | 4,08E-03 | 0,76 | 3,37E-02 |
| ENSG00000005882 | PDK2       | 0,82 | 1,31E-02 | 0,84 | 1,18E-02 |
| ENSG00000007314 | SCN4A      | 0,65 | 1,89E-04 | 0,38 | 4,36E-03 |
| ENSG00000011523 | CEP68      | 0,87 | 3,25E-02 | 0,86 | 1,86E-02 |
| ENSG00000019485 | PRDM11     | 0,83 | 3,96E-02 | 0,78 | 7,39E-03 |
| ENSG00000028528 | SNX1       | 0,86 | 3,30E-02 | 0,84 | 2,05E-04 |
| ENSG00000048540 | LMO3       | 0,58 | 3,82E-03 | 0,28 | 1,67E-05 |
| ENSG00000054598 | FOXC1      | 0,82 | 2,00E-02 | 0,78 | 6,22E-03 |
| ENSG00000054938 | CHRD12     | 0,14 | 1,20E-04 | 0,13 | 7,07E-09 |
| ENSG00000059145 | UNKL       | 0,86 | 3,55E-02 | 0,79 | 2,39E-02 |
| ENSG00000063127 | SLC6A16    | 0,73 | 2,41E-02 | 0,62 | 8,91E-03 |
| ENSG00000066735 | KIF26A     | 0,80 | 3,52E-02 | 0,59 | 4,14E-04 |
| ENSG00000069535 | MAOB       | 0,64 | 2,51E-02 | 0,71 | 7,75E-04 |
| ENSG00000071242 | RPS6KA2    | 0,88 | 4,42E-02 | 0,72 | 4,03E-03 |
| ENSG00000079482 | OPHN1      | 0,85 | 1,90E-02 | 0,66 | 2,01E-03 |
| ENSG00000082458 | DLG3       | 0,86 | 4,50E-02 | 0,88 | 2,75E-02 |
| ENSG00000085741 | WNT11      | 0,68 | 3,19E-02 | 0,56 | 2,92E-02 |
| ENSG00000087274 | ADD1       | 0,91 | 2,00E-02 | 0,88 | 1,43E-03 |
| ENSG00000088367 | EPB41L1    | 0,71 | 4,71E-03 | 0,71 | 5,17E-04 |
| ENSG00000088808 | PPP1R13B   | 0,85 | 2,14E-02 | 0,80 | 1,78E-02 |
| ENSG00000090447 | TFAP4      | 0,79 | 4,93E-03 | 0,78 | 2,96E-02 |
| ENSG00000094963 | FMO2       | 0,63 | 2,56E-02 | 0,38 | 2,20E-03 |
| ENSG00000099365 | STX1B      | 0,56 | 1,54E-03 | 0,70 | 1,14E-02 |
| ENSG00000099864 | PALM       | 0,66 | 1,08E-02 | 0,54 | 2,20E-03 |
| ENSG00000099995 | SF3A1      | 0,88 | 2,01E-02 | 0,88 | 9,68E-03 |
| ENSG00000100105 | PATZ1      | 0,87 | 2,91E-02 | 0,77 | 9,26E-05 |
| ENSG00000100307 | CBX7       | 0,73 | 4,60E-03 | 0,76 | 2,13E-03 |
| ENSG00000100399 | CHADL      | 0,63 | 2,33E-02 | 0,63 | 1,29E-02 |
| ENSG00000101493 | ZNF516     | 0,83 | 2,05E-02 | 0,79 | 1,75E-02 |
| ENSG00000102466 | FGF14      | 0,41 | 1,89E-04 | 0,58 | 2,01E-04 |
| ENSG00000105227 | PRX        | 0,80 | 2,32E-02 | 0,50 | 8,87E-06 |
| ENSG00000105357 | MYH14      | 0,67 | 7,74E-03 | 0,58 | 3,01E-03 |
| ENSG00000105997 | HOXA3      | 0,75 | 4,72E-02 | 0,77 | 3,26E-02 |

|                 |          |      |          |      |          |
|-----------------|----------|------|----------|------|----------|
| ENSG00000106351 | AGFG2    | 0,87 | 4,11E-02 | 0,81 | 4,64E-02 |
| ENSG00000107719 | PALD1    | 0,80 | 1,29E-02 | 0,75 | 1,05E-02 |
| ENSG00000108828 | VAT1     | 0,87 | 3,22E-02 | 0,84 | 2,43E-02 |
| ENSG00000109118 | PHF12    | 0,90 | 3,89E-02 | 0,85 | 3,93E-02 |
| ENSG00000109794 | FAM149A  | 0,70 | 4,87E-03 | 0,60 | 5,26E-05 |
| ENSG00000110237 | ARHGEF17 | 0,78 | 2,31E-03 | 0,76 | 3,72E-02 |
| ENSG00000111077 | TNS2     | 0,73 | 1,92E-03 | 0,67 | 7,33E-05 |
| ENSG00000111319 | SCNN1A   | 0,58 | 4,72E-02 | 0,76 | 2,22E-02 |
| ENSG00000112294 | ALDH5A1  | 0,83 | 1,99E-02 | 0,78 | 3,08E-02 |
| ENSG00000112511 | PHF1     | 0,82 | 2,44E-03 | 0,83 | 2,91E-02 |
| ENSG00000112877 | CEP72    | 0,79 | 4,34E-02 | 0,64 | 1,00E-02 |
| ENSG00000113916 | BCL6     | 0,81 | 8,59E-03 | 0,79 | 1,70E-02 |
| ENSG00000115468 | EFHD1    | 0,68 | 4,68E-03 | 0,76 | 2,54E-02 |
| ENSG00000116016 | EPAS1    | 0,76 | 5,46E-03 | 0,85 | 3,04E-02 |
| ENSG00000116147 | TNR      | 0,65 | 1,98E-02 | 0,44 | 1,08E-03 |
| ENSG00000116584 | ARHGEF2  | 0,86 | 6,33E-03 | 0,87 | 1,63E-02 |
| ENSG00000117643 | MAN1C1   | 0,82 | 3,23E-02 | 0,61 | 3,92E-04 |
| ENSG00000121005 | CRISPLD1 | 0,51 | 1,84E-02 | 0,36 | 9,29E-06 |
| ENSG00000121057 | AKAP1    | 0,78 | 2,92E-02 | 0,79 | 1,95E-03 |
| ENSG00000123095 | BHLHE41  | 0,77 | 4,45E-02 | 0,78 | 7,34E-04 |
| ENSG00000124181 | PLCG1    | 0,89 | 2,91E-02 | 0,79 | 2,34E-03 |
| ENSG00000124440 | HIF3A    | 0,49 | 2,07E-03 | 0,58 | 2,72E-02 |
| ENSG00000126351 | THRA     | 0,82 | 9,37E-03 | 0,86 | 3,14E-02 |
| ENSG00000126368 | NR1D1    | 0,64 | 1,03E-02 | 0,79 | 3,65E-02 |
| ENSG00000126562 | WNK4     | 0,59 | 7,75E-03 | 0,59 | 3,54E-03 |
| ENSG00000128833 | MYO5C    | 0,78 | 2,71E-02 | 0,72 | 1,57E-02 |
| ENSG00000129244 | ATP1B2   | 0,71 | 3,07E-02 | 0,51 | 4,47E-06 |
| ENSG00000129353 | SLC44A2  | 0,85 | 1,91E-02 | 0,80 | 2,85E-02 |
| ENSG00000129474 | AJUBA    | 0,85 | 4,92E-02 | 0,79 | 8,13E-03 |
| ENSG00000129682 | FGF13    | 0,72 | 4,46E-02 | 0,53 | 4,23E-05 |
| ENSG00000130294 | KIF1A    | 0,25 | 1,27E-02 | 0,37 | 8,64E-08 |
| ENSG00000130787 | HIP1R    | 0,79 | 3,56E-03 | 0,72 | 4,64E-03 |
| ENSG00000132122 | SPATA6   | 0,85 | 2,30E-02 | 0,77 | 2,14E-03 |
| ENSG00000133401 | PDZD2    | 0,77 | 4,60E-02 | 0,76 | 3,13E-02 |
| ENSG00000133619 | KRBA1    | 0,83 | 1,16E-02 | 0,68 | 3,43E-03 |
| ENSG00000134363 | FST      | 0,75 | 2,30E-02 | 0,37 | 1,66E-06 |
| ENSG00000136205 | TNS3     | 0,84 | 1,02E-02 | 0,77 | 1,27E-02 |
| ENSG00000137103 | TMEM8B   | 0,76 | 1,82E-02 | 0,67 | 1,82E-03 |
| ENSG00000137285 | TUBB2B   | 0,68 | 1,46E-02 | 0,65 | 2,55E-04 |
| ENSG00000137941 | TTLL7    | 0,69 | 1,75E-02 | 0,68 | 8,43E-04 |
| ENSG00000137962 | ARHGAP29 | 0,79 | 3,21E-02 | 0,66 | 6,16E-03 |
| ENSG00000139651 | ZNF740   | 0,90 | 1,93E-02 | 0,84 | 6,41E-03 |
| ENSG00000140538 | NTRK3    | 0,70 | 3,56E-03 | 0,31 | 2,64E-05 |
| ENSG00000140577 | CRTC3    | 0,86 | 2,14E-02 | 0,87 | 3,26E-02 |
| ENSG00000141469 | SLC14A1  | 0,53 | 1,71E-02 | 0,51 | 7,05E-06 |
| ENSG00000142611 | PRDM16   | 0,74 | 2,72E-02 | 0,42 | 1,93E-05 |
| ENSG00000143409 | MINDY1   | 0,88 | 9,05E-03 | 0,72 | 1,18E-02 |

|                 |          |      |          |      |          |
|-----------------|----------|------|----------|------|----------|
| ENSG00000143842 | SOX13    | 0,75 | 2,06E-03 | 0,64 | 6,94E-03 |
| ENSG00000144749 | LRIG1    | 0,75 | 2,22E-02 | 0,60 | 4,71E-07 |
| ENSG00000144791 | LIMD1    | 0,93 | 3,88E-02 | 0,82 | 3,14E-02 |
| ENSG00000144891 | AGTR1    | 0,72 | 3,83E-02 | 0,54 | 1,04E-03 |
| ENSG00000144908 | ALDH1L1  | 0,69 | 4,81E-02 | 0,49 | 7,24E-07 |
| ENSG00000145687 | SSBP2    | 0,86 | 2,63E-02 | 0,81 | 1,46E-02 |
| ENSG00000146122 | DAAM2    | 0,83 | 3,16E-02 | 0,71 | 4,48E-03 |
| ENSG00000146278 | PNRC1    | 0,87 | 2,69E-02 | 0,83 | 2,95E-03 |
| ENSG00000148337 | CIZ1     | 0,85 | 2,22E-02 | 0,87 | 2,91E-02 |
| ENSG00000149499 | EML3     | 0,89 | 4,24E-02 | 0,78 | 1,65E-02 |
| ENSG00000149577 | SIDT2    | 0,85 | 1,74E-02 | 0,82 | 3,34E-02 |
| ENSG00000150938 | CRIM1    | 0,72 | 1,54E-03 | 0,56 | 1,91E-07 |
| ENSG00000152284 | TCF7L1   | 0,70 | 4,16E-03 | 0,57 | 7,65E-06 |
| ENSG00000152465 | NMT2     | 0,83 | 2,73E-02 | 0,78 | 5,75E-04 |
| ENSG00000153902 | LGI4     | 0,76 | 2,40E-02 | 0,42 | 1,07E-06 |
| ENSG00000154358 | OBSCN    | 0,81 | 2,65E-02 | 0,60 | 7,75E-04 |
| ENSG00000156463 | SH3RF2   | 0,66 | 2,30E-02 | 0,59 | 1,74E-03 |
| ENSG00000157216 | SSBP3    | 0,85 | 2,65E-02 | 0,80 | 1,82E-03 |
| ENSG00000159307 | SCUBE1   | 0,56 | 1,27E-04 | 0,42 | 2,15E-06 |
| ENSG00000162654 | GBP4     | 0,80 | 4,83E-03 | 0,51 | 3,22E-05 |
| ENSG00000162998 | FRZB     | 0,53 | 3,99E-07 | 0,27 | 1,87E-09 |
| ENSG00000163050 | COQ8A    | 0,87 | 1,49E-02 | 0,81 | 2,69E-02 |
| ENSG00000163697 | APBB2    | 0,83 | 4,16E-02 | 0,79 | 2,43E-02 |
| ENSG00000163864 | NMNAT3   | 0,73 | 2,13E-02 | 0,74 | 1,86E-02 |
| ENSG00000163884 | KLF15    | 0,63 | 6,46E-04 | 0,65 | 4,76E-04 |
| ENSG00000164442 | CITED2   | 0,78 | 3,25E-02 | 0,79 | 6,00E-05 |
| ENSG00000165626 | BEND7    | 0,79 | 3,85E-02 | 0,76 | 4,06E-02 |
| ENSG00000165757 | JCAD     | 0,73 | 3,52E-03 | 0,67 | 6,77E-05 |
| ENSG00000165795 | NDRG2    | 0,70 | 6,55E-03 | 0,62 | 1,83E-06 |
| ENSG00000166816 | LDHD     | 0,80 | 3,07E-02 | 0,63 | 2,53E-03 |
| ENSG00000166888 | STAT6    | 0,88 | 5,92E-03 | 0,85 | 1,14E-02 |
| ENSG00000167037 | SGSM1    | 0,63 | 2,89E-03 | 0,47 | 1,30E-06 |
| ENSG00000167191 | GPRC5B   | 0,79 | 6,52E-03 | 0,49 | 3,32E-07 |
| ENSG00000169302 | STK32A   | 0,76 | 1,66E-02 | 0,56 | 2,18E-05 |
| ENSG00000170088 | TMEM192  | 0,90 | 3,19E-02 | 0,81 | 1,42E-02 |
| ENSG00000170271 | FAXDC2   | 0,78 | 4,88E-03 | 0,74 | 9,20E-04 |
| ENSG00000171798 | KNDC1    | 0,63 | 1,63E-02 | 0,70 | 3,23E-02 |
| ENSG00000172840 | PDP2     | 0,86 | 3,43E-02 | 0,76 | 2,72E-02 |
| ENSG00000173267 | SNCG     | 0,62 | 1,87E-02 | 0,61 | 5,06E-04 |
| ENSG00000176438 | SYNE3    | 0,85 | 2,88E-02 | 0,71 | 5,33E-03 |
| ENSG00000179399 | GPC5     | 0,43 | 1,27E-04 | 0,36 | 1,47E-08 |
| ENSG00000179542 | SLITRK4  | 0,70 | 2,06E-03 | 0,53 | 1,95E-03 |
| ENSG00000179981 | TSHZ1    | 0,85 | 2,14E-02 | 0,68 | 4,72E-06 |
| ENSG00000181513 | ACBD4    | 0,81 | 7,44E-03 | 0,74 | 6,83E-03 |
| ENSG00000182473 | EXOC7    | 0,94 | 4,95E-02 | 0,91 | 1,76E-02 |
| ENSG00000183111 | ARHGEF37 | 0,77 | 1,92E-02 | 0,68 | 1,45E-03 |
| ENSG00000183779 | ZNF703   | 0,73 | 2,30E-02 | 0,62 | 1,86E-03 |

|                 |            |      |          |      |          |
|-----------------|------------|------|----------|------|----------|
| ENSG00000185561 | TLCD2      | 0,75 | 1,82E-02 | 0,71 | 3,16E-02 |
| ENSG00000185950 | IRS2       | 0,66 | 1,57E-02 | 0,75 | 2,43E-02 |
| ENSG00000186350 | RXRA       | 0,83 | 1,08E-02 | 0,75 | 5,88E-03 |
| ENSG00000186377 | CYP4X1     | 0,66 | 1,54E-02 | 0,50 | 1,92E-03 |
| ENSG00000187244 | BCAM       | 0,72 | 2,50E-03 | 0,64 | 4,42E-02 |
| ENSG00000187595 | ZNF385C    | 0,51 | 3,82E-03 | 0,43 | 2,30E-06 |
| ENSG00000188763 | FZD9       | 0,56 | 2,30E-02 | 0,64 | 6,02E-03 |
| ENSG00000189056 | RELN       | 0,53 | 2,56E-02 | 0,22 | 7,37E-12 |
| ENSG00000189129 | PLAC9      | 0,80 | 3,74E-02 | 0,66 | 6,92E-03 |
| ENSG00000196104 | SPOCK3     | 0,24 | 3,41E-04 | 0,22 | 1,56E-09 |
| ENSG00000197442 | MAP3K5     | 0,84 | 1,84E-03 | 0,74 | 6,92E-03 |
| ENSG00000198369 | SPRED2     | 0,78 | 7,26E-03 | 0,78 | 5,00E-03 |
| ENSG00000205726 | ITSN1      | 0,84 | 3,76E-02 | 0,65 | 9,33E-05 |
| ENSG00000211445 | GPX3       | 0,67 | 2,87E-02 | 0,64 | 1,91E-05 |
| ENSG00000223561 | AC005165.1 | 0,43 | 1,20E-04 | 0,45 | 5,31E-04 |
| ENSG00000225032 | AL162586.1 | 0,73 | 3,19E-02 | 0,75 | 2,31E-02 |
| ENSG00000233622 | CYP2T1P    | 0,66 | 2,59E-02 | 0,72 | 1,23E-02 |
| ENSG00000242732 | RTL5       | 0,78 | 1,24E-02 | 0,72 | 4,11E-03 |
| ENSG00000256995 | AC084816.1 | 0,38 | 2,20E-02 | 0,45 | 2,20E-05 |
| ENSG00000257337 | AC068888.1 | 0,76 | 1,23E-02 | 0,69 | 7,24E-06 |
| ENSG00000259916 | AL845331.2 | 0,46 | 3,16E-02 | 0,34 | 3,50E-02 |
| ENSG00000260139 | CSPG4P13   | 0,67 | 3,75E-03 | 0,59 | 1,86E-02 |
| ENSG00000263155 | MYZAP      | 0,60 | 1,55E-02 | 0,47 | 3,56E-04 |
| ENSG00000265972 | TXNIP      | 0,78 | 2,83E-02 | 0,77 | 6,64E-03 |
| ENSG00000275023 | MLLT6      | 0,85 | 3,75E-03 | 0,81 | 1,91E-02 |
| ENSG00000275395 | FCGBP      | 0,71 | 2,37E-02 | 0,55 | 1,82E-03 |
| ENSG00000277449 | CEBPB-AS1  | 0,74 | 2,00E-02 | 0,69 | 7,14E-03 |
| ENSG00000280339 | AP001528.3 | 0,66 | 2,65E-02 | 0,38 | 1,28E-06 |
