# Supplementary material for: RNA Sequencing Reveals Interacting Key Determinants of Osteoarthritis Acting in Subchondral Bone and Articular Cartilage: Identification of IL11 and CHADL as Attractive Treatment Targets
Source: PubMed Central journal article supplement — Arthritis Rheumatol. 2021 Mar 21;73(5):789–99. doi: 10.1002/art.41600 (PMC8252798; doi:10.1002/art.41600), 2021-03-21
Supplement: ART-73-789-s013.pdf [file ART-73-789-s013.pdf]

**Supplementary table 10** - Significant differentially expressed genes exclusive for knee OA subchondral bone

| Ensembl gene ID | Gene       | P-value  | FDR      | Log 2 fold change | Fold change |
|-----------------|------------|----------|----------|-------------------|-------------|
| ENSG00000249306 | LINC01411  | 2,54E-07 | 1,70E-04 | 2,65              | 6,27        |
| ENSG00000072041 | SLC6A15    | 4,09E-06 | 1,22E-03 | -1,73             | 0,30        |
| ENSG00000113263 | ITK        | 9,38E-06 | 1,76E-03 | 0,58              | 1,49        |
| ENSG00000196787 | HIST1H2AG  | 9,75E-06 | 1,76E-03 | 0,58              | 1,50        |
| ENSG00000275221 | HIST1H2AK  | 1,18E-05 | 1,90E-03 | 0,58              | 1,49        |
| ENSG00000101057 | MYBL2      | 1,20E-05 | 1,91E-03 | 1,07              | 2,10        |
| ENSG00000122966 | CIT        | 1,24E-05 | 1,93E-03 | 0,51              | 1,43        |
| ENSG00000274997 | HIST1H2AH  | 1,37E-05 | 1,98E-03 | 0,55              | 1,47        |
| ENSG00000278272 | HIST1H3C   | 1,64E-05 | 2,19E-03 | 0,84              | 1,79        |
| ENSG00000138160 | KIF11      | 1,89E-05 | 2,39E-03 | 0,68              | 1,60        |
| ENSG00000100593 | ISM2       | 1,91E-05 | 2,39E-03 | 1,77              | 3,40        |
| ENSG00000162739 | SLAMF6     | 2,05E-05 | 2,47E-03 | 0,79              | 1,73        |
| ENSG00000169679 | BUB1       | 2,50E-05 | 2,81E-03 | 0,79              | 1,73        |
| ENSG00000090382 | LYZ        | 2,56E-05 | 2,82E-03 | 0,64              | 1,56        |
| ENSG00000277224 | HIST1H2BF  | 2,59E-05 | 2,83E-03 | 0,58              | 1,49        |
| ENSG00000253141 | AC008632.1 | 2,76E-05 | 2,91E-03 | -1,68             | 0,31        |
| ENSG00000019505 | SYT13      | 2,81E-05 | 2,92E-03 | 2,33              | 5,04        |
| ENSG00000185730 | ZNF696     | 2,81E-05 | 2,92E-03 | -0,39             | 0,77        |
| ENSG00000136167 | LCP1       | 3,09E-05 | 2,98E-03 | 0,45              | 1,37        |
| ENSG00000158481 | CD1C       | 3,08E-05 | 2,98E-03 | 0,69              | 1,61        |
| ENSG00000274267 | HIST1H3B   | 3,20E-05 | 3,05E-03 | 0,75              | 1,69        |
| ENSG00000205268 | PDE7A      | 4,93E-05 | 4,07E-03 | 0,39              | 1,31        |
| ENSG00000184357 | HIST1H1B   | 5,70E-05 | 4,40E-03 | 0,61              | 1,53        |
| ENSG00000171388 | APLN       | 5,81E-05 | 4,43E-03 | -0,51             | 0,70        |
| ENSG00000126787 | DLGAP5     | 5,91E-05 | 4,44E-03 | 1,23              | 2,35        |
| ENSG00000276410 | HIST1H2BB  | 7,06E-05 | 4,89E-03 | 0,57              | 1,49        |
| ENSG00000117724 | CENPF      | 7,62E-05 | 5,07E-03 | 0,71              | 1,64        |
| ENSG00000125354 | SEPT6      | 7,86E-05 | 5,10E-03 | 0,30              | 1,23        |
| ENSG00000197635 | DPP4       | 8,10E-05 | 5,20E-03 | 0,76              | 1,69        |
| ENSG00000131747 | TOP2A      | 8,28E-05 | 5,28E-03 | 0,77              | 1,71        |
| ENSG00000130812 | ANGPTL6    | 9,02E-05 | 5,54E-03 | 1,34              | 2,53        |
| ENSG00000131475 | VPS25      | 9,78E-05 | 5,90E-03 | 0,26              | 1,19        |
| ENSG00000197153 | HIST1H3J   | 1,15E-04 | 6,24E-03 | 0,94              | 1,91        |
| ENSG00000169385 | RNASE2     | 1,18E-04 | 6,35E-03 | 1,22              | 2,33        |
| ENSG00000273703 | HIST1H2BM  | 1,21E-04 | 6,48E-03 | 0,91              | 1,88        |
| ENSG00000105639 | JAK3       | 1,24E-04 | 6,57E-03 | 0,54              | 1,45        |
| ENSG00000049540 | ELN        | 1,40E-04 | 7,03E-03 | -0,55             | 0,68        |
| ENSG00000140157 | NIPA2      | 1,59E-04 | 7,49E-03 | 0,33              | 1,26        |
| ENSG00000273983 | HIST1H3G   | 1,60E-04 | 7,49E-03 | 0,88              | 1,84        |
| ENSG00000172575 | RASGRP1    | 1,64E-04 | 7,54E-03 | 0,60              | 1,51        |
| ENSG00000197057 | DTHD1      | 1,68E-04 | 7,55E-03 | 0,97              | 1,95        |
| ENSG00000103145 | HCFC1R1    | 1,78E-04 | 7,74E-03 | 0,30              | 1,23        |
| ENSG00000085265 | FCN1       | 1,85E-04 | 7,75E-03 | 0,55              | 1,47        |

|                 |            |          |          |       |      |
|-----------------|------------|----------|----------|-------|------|
| ENSG00000128641 | MYO1B      | 1,84E-04 | 7,75E-03 | 0,39  | 1,31 |
| ENSG00000139734 | DIAPH3     | 1,82E-04 | 7,75E-03 | 1,05  | 2,07 |
| ENSG00000118193 | KIF14      | 2,03E-04 | 8,28E-03 | 0,73  | 1,66 |
| ENSG00000266524 | GDF10      | 2,11E-04 | 8,40E-03 | -0,79 | 0,58 |
| ENSG00000076685 | NT5C2      | 2,23E-04 | 8,62E-03 | 0,19  | 1,14 |
| ENSG00000182566 | CLEC4G     | 2,22E-04 | 8,62E-03 | 0,99  | 1,99 |
| ENSG00000112249 | ASCC3      | 2,56E-04 | 9,38E-03 | 0,29  | 1,22 |
| ENSG00000127377 | CRYGN      | 2,57E-04 | 9,38E-03 | -0,85 | 0,55 |
| ENSG00000183876 | ARSI       | 2,69E-04 | 9,67E-03 | 1,72  | 3,29 |
| ENSG00000186994 | KANK3      | 2,83E-04 | 9,88E-03 | -0,42 | 0,75 |
| ENSG00000168672 | FAM84B     | 2,98E-04 | 1,02E-02 | -0,43 | 0,74 |
| ENSG00000277734 | TRAC       | 3,04E-04 | 1,04E-02 | 0,58  | 1,50 |
| ENSG00000278588 | HIST1H2BI  | 3,17E-04 | 1,06E-02 | 0,48  | 1,40 |
| ENSG00000171848 | RRM2       | 3,22E-04 | 1,07E-02 | 1,06  | 2,09 |
| ENSG00000164509 | IL31RA     | 3,28E-04 | 1,08E-02 | 1,45  | 2,73 |
| ENSG00000132470 | ITGB4      | 3,40E-04 | 1,10E-02 | -0,44 | 0,74 |
| ENSG00000165929 | TC2N       | 3,49E-04 | 1,12E-02 | 0,55  | 1,46 |
| ENSG00000105321 | CCDC9      | 3,58E-04 | 1,13E-02 | -0,30 | 0,81 |
| ENSG00000134817 | APLNR      | 3,60E-04 | 1,13E-02 | -0,35 | 0,78 |
| ENSG00000123892 | RAB38      | 3,70E-04 | 1,14E-02 | 0,65  | 1,57 |
| ENSG00000137573 | SULF1      | 3,78E-04 | 1,15E-02 | 0,37  | 1,29 |
| ENSG00000118596 | SLC16A7    | 3,85E-04 | 1,16E-02 | 0,32  | 1,25 |
| ENSG00000160953 | PWWP3A     | 3,89E-04 | 1,17E-02 | -0,21 | 0,86 |
| ENSG00000121316 | PLBD1      | 3,96E-04 | 1,18E-02 | 0,29  | 1,23 |
| ENSG00000130749 | AC008755.1 | 4,35E-04 | 1,25E-02 | -0,35 | 0,78 |
| ENSG00000143570 | SLC39A1    | 4,41E-04 | 1,25E-02 | 0,19  | 1,14 |
| ENSG00000260428 | SCX        | 4,42E-04 | 1,26E-02 | 1,05  | 2,07 |
| ENSG00000275713 | HIST1H2BH  | 4,44E-04 | 1,26E-02 | 0,58  | 1,50 |
| ENSG00000123496 | IL13RA2    | 4,52E-04 | 1,27E-02 | -0,87 | 0,55 |
| ENSG00000076984 | MAP2K7     | 4,55E-04 | 1,27E-02 | -0,26 | 0,83 |
| ENSG00000135341 | MAP3K7     | 4,84E-04 | 1,32E-02 | 0,19  | 1,14 |
| ENSG00000066279 | ASPM       | 4,88E-04 | 1,33E-02 | 0,79  | 1,73 |
| ENSG00000134242 | PTPN22     | 4,89E-04 | 1,33E-02 | 0,42  | 1,33 |
| ENSG00000159363 | ATP13A2    | 4,90E-04 | 1,33E-02 | -0,33 | 0,80 |
| ENSG00000182397 | DNM1P46    | 5,06E-04 | 1,35E-02 | -0,84 | 0,56 |
| ENSG00000037749 | MFAP3      | 5,19E-04 | 1,36E-02 | 0,20  | 1,15 |
| ENSG00000145623 | OSMR       | 5,17E-04 | 1,36E-02 | 0,65  | 1,57 |
| ENSG00000154027 | AK5        | 5,19E-04 | 1,36E-02 | 0,99  | 1,98 |
| ENSG00000170962 | PDGFD      | 5,26E-04 | 1,37E-02 | 0,35  | 1,28 |
| ENSG00000276368 | HIST1H2AJ  | 5,77E-04 | 1,44E-02 | 0,75  | 1,68 |
| ENSG00000138180 | CEP55      | 5,89E-04 | 1,45E-02 | 1,10  | 2,14 |
| ENSG00000185862 | EVI2B      | 6,01E-04 | 1,46E-02 | 0,33  | 1,26 |
| ENSG00000051341 | POLQ       | 6,07E-04 | 1,47E-02 | 0,77  | 1,71 |
| ENSG00000128699 | ORMDL1     | 6,19E-04 | 1,49E-02 | 0,22  | 1,16 |
| ENSG00000175354 | PTPN2      | 6,36E-04 | 1,51E-02 | 0,25  | 1,19 |
| ENSG00000185236 | RAB11B     | 6,45E-04 | 1,52E-02 | -0,29 | 0,82 |
| ENSG00000101916 | TLR8       | 6,50E-04 | 1,53E-02 | 0,37  | 1,29 |

|                 |           |          |          |       |      |
|-----------------|-----------|----------|----------|-------|------|
| ENSG00000197530 | MIB2      | 6,55E-04 | 1,54E-02 | -0,23 | 0,85 |
| ENSG00000118432 | CNR1      | 6,58E-04 | 1,54E-02 | -0,60 | 0,66 |
| ENSG00000115232 | ITGA4     | 6,66E-04 | 1,56E-02 | 0,38  | 1,30 |
| ENSG00000150681 | RGS18     | 7,00E-04 | 1,62E-02 | 0,37  | 1,29 |
| ENSG00000157927 | RADIL     | 7,10E-04 | 1,63E-02 | -0,43 | 0,74 |
| ENSG00000005381 | MPO       | 7,21E-04 | 1,64E-02 | 0,74  | 1,67 |
| ENSG00000073737 | DHRS9     | 7,50E-04 | 1,68E-02 | 0,96  | 1,94 |
| ENSG00000112787 | FBRSL1    | 7,49E-04 | 1,68E-02 | -0,31 | 0,80 |
| ENSG00000119669 | IRF2BPL   | 7,57E-04 | 1,69E-02 | -0,39 | 0,76 |
| ENSG00000198208 | RPS6KL1   | 7,62E-04 | 1,70E-02 | -0,50 | 0,71 |
| ENSG00000154127 | UBASH3B   | 7,83E-04 | 1,73E-02 | 0,56  | 1,47 |
| ENSG00000186160 | CYP4Z1    | 8,04E-04 | 1,76E-02 | -1,00 | 0,50 |
| ENSG00000277775 | HIST1H3F  | 8,06E-04 | 1,76E-02 | 0,57  | 1,49 |
| ENSG00000106278 | PTPRZ1    | 8,12E-04 | 1,76E-02 | 0,52  | 1,43 |
| ENSG00000126822 | PLEKHG3   | 8,20E-04 | 1,77E-02 | -0,32 | 0,80 |
| ENSG00000053918 | KCNQ1     | 8,42E-04 | 1,80E-02 | -0,40 | 0,76 |
| ENSG00000066294 | CD84      | 8,66E-04 | 1,83E-02 | 0,54  | 1,45 |
| ENSG00000148154 | UGCG      | 8,70E-04 | 1,83E-02 | 0,27  | 1,21 |
| ENSG00000215041 | NEURL4    | 8,86E-04 | 1,85E-02 | -0,26 | 0,83 |
| ENSG00000060491 | OGFR      | 8,97E-04 | 1,86E-02 | -0,18 | 0,88 |
| ENSG00000108231 | LGI1      | 9,23E-04 | 1,89E-02 | -1,29 | 0,41 |
| ENSG00000175054 | ATR       | 9,22E-04 | 1,89E-02 | 0,22  | 1,17 |
| ENSG00000136068 | FLNB      | 9,27E-04 | 1,89E-02 | -0,21 | 0,87 |
| ENSG00000082146 | STRADB    | 9,36E-04 | 1,90E-02 | 0,31  | 1,24 |
| ENSG00000118217 | ATF6      | 9,47E-04 | 1,91E-02 | 0,13  | 1,10 |
| ENSG00000118113 | MMP8      | 9,67E-04 | 1,93E-02 | 1,17  | 2,26 |
| ENSG00000175785 | PRIMA1    | 9,67E-04 | 1,93E-02 | -0,97 | 0,51 |
| ENSG00000110911 | SLC11A2   | 9,82E-04 | 1,94E-02 | 0,22  | 1,17 |
| ENSG00000111206 | FOXM1     | 9,85E-04 | 1,94E-02 | 0,92  | 1,90 |
| ENSG00000160588 | MPZL3     | 9,84E-04 | 1,94E-02 | 0,57  | 1,49 |
| ENSG00000136560 | TANK      | 9,94E-04 | 1,95E-02 | 0,21  | 1,16 |
| ENSG00000144810 | COL8A1    | 1,00E-03 | 1,96E-02 | 0,24  | 1,18 |
| ENSG00000185920 | PTCH1     | 1,03E-03 | 1,99E-02 | -0,43 | 0,74 |
| ENSG00000075413 | MARK3     | 1,05E-03 | 2,01E-02 | 0,19  | 1,14 |
| ENSG00000137804 | NUSAP1    | 1,05E-03 | 2,01E-02 | 0,62  | 1,53 |
| ENSG00000128524 | ATP6V1F   | 1,06E-03 | 2,03E-02 | 0,33  | 1,25 |
| ENSG00000115226 | FNDC4     | 1,07E-03 | 2,04E-02 | 0,29  | 1,22 |
| ENSG00000014824 | SLC30A9   | 1,09E-03 | 2,06E-02 | 0,24  | 1,18 |
| ENSG00000182481 | KPNA2     | 1,10E-03 | 2,07E-02 | 0,32  | 1,25 |
| ENSG00000137449 | CPEB2     | 1,10E-03 | 2,08E-02 | -0,21 | 0,87 |
| ENSG00000041515 | MYO16     | 1,11E-03 | 2,08E-02 | -0,78 | 0,58 |
| ENSG00000074964 | ARHGEF10L | 1,12E-03 | 2,10E-02 | -0,22 | 0,86 |
| ENSG00000205903 | ZNF316    | 1,14E-03 | 2,12E-02 | -0,32 | 0,80 |
| ENSG00000134419 | RPS15A    | 1,15E-03 | 2,12E-02 | 0,23  | 1,17 |
| ENSG00000099904 | ZDHHC8    | 1,17E-03 | 2,15E-02 | -0,31 | 0,81 |
| ENSG00000151466 | SCLT1     | 1,18E-03 | 2,16E-02 | 0,22  | 1,17 |
| ENSG00000005187 | ACSM3     | 1,19E-03 | 2,17E-02 | 0,71  | 1,63 |

|                 |          |          |          |       |      |
|-----------------|----------|----------|----------|-------|------|
| ENSG00000150337 | FCGR1A   | 1,19E-03 | 2,17E-02 | 0,71  | 1,63 |
| ENSG00000068489 | PRR11    | 1,22E-03 | 2,20E-02 | 0,48  | 1,39 |
| ENSG00000111962 | UST      | 1,22E-03 | 2,20E-02 | 0,38  | 1,30 |
| ENSG00000205413 | SAMD9    | 1,22E-03 | 2,21E-02 | 0,25  | 1,19 |
| ENSG00000148357 | HMCN2    | 1,24E-03 | 2,22E-02 | -0,94 | 0,52 |
| ENSG00000166257 | SCN3B    | 1,24E-03 | 2,22E-02 | 0,64  | 1,56 |
| ENSG00000186854 | TRABD2A  | 1,24E-03 | 2,23E-02 | 0,62  | 1,54 |
| ENSG00000100106 | TRIOBP   | 1,25E-03 | 2,24E-02 | -0,23 | 0,85 |
| ENSG00000107821 | KAZALD1  | 1,27E-03 | 2,26E-02 | 0,59  | 1,51 |
| ENSG00000155307 | SAMSN1   | 1,30E-03 | 2,31E-02 | 0,45  | 1,37 |
| ENSG00000052126 | PLEKHA5  | 1,34E-03 | 2,35E-02 | 0,30  | 1,23 |
| ENSG00000072042 | RDH11    | 1,34E-03 | 2,35E-02 | 0,27  | 1,20 |
| ENSG00000065054 | SLC9A3R2 | 1,35E-03 | 2,35E-02 | -0,29 | 0,82 |
| ENSG00000119912 | IDE      | 1,36E-03 | 2,36E-02 | 0,19  | 1,14 |
| ENSG00000170312 | CDK1     | 1,36E-03 | 2,37E-02 | 0,46  | 1,38 |
| ENSG00000253293 | HOXA10   | 1,37E-03 | 2,38E-02 | -0,23 | 0,86 |
| ENSG00000101955 | SRPX     | 1,39E-03 | 2,39E-02 | 0,82  | 1,76 |
| ENSG00000137812 | KNL1     | 1,40E-03 | 2,40E-02 | 0,71  | 1,63 |
| ENSG00000081237 | PTPRC    | 1,41E-03 | 2,41E-02 | 0,35  | 1,28 |
| ENSG00000144730 | IL17RD   | 1,43E-03 | 2,43E-02 | -0,38 | 0,77 |
| ENSG00000110799 | VWF      | 1,44E-03 | 2,44E-02 | -0,56 | 0,68 |
| ENSG00000130479 | MAP1S    | 1,44E-03 | 2,44E-02 | -0,36 | 0,78 |
| ENSG00000163749 | CCDC158  | 1,44E-03 | 2,44E-02 | 0,64  | 1,56 |
| ENSG00000172216 | CEBPB    | 1,45E-03 | 2,45E-02 | -0,39 | 0,76 |
| ENSG00000182809 | CRIP2    | 1,45E-03 | 2,45E-02 | -0,29 | 0,82 |
| ENSG00000066629 | EML1     | 1,46E-03 | 2,45E-02 | 0,26  | 1,19 |
| ENSG00000077232 | DNAJC10  | 1,46E-03 | 2,45E-02 | 0,19  | 1,14 |
| ENSG00000083223 | TUT7     | 1,48E-03 | 2,47E-02 | 0,22  | 1,16 |
| ENSG00000106290 | TAF6     | 1,48E-03 | 2,47E-02 | -0,24 | 0,85 |
| ENSG00000126464 | PRR12    | 1,50E-03 | 2,48E-02 | -0,39 | 0,76 |
| ENSG00000172139 | SLC9C1   | 1,51E-03 | 2,48E-02 | 0,93  | 1,91 |
| ENSG00000180900 | SCRIB    | 1,50E-03 | 2,48E-02 | -0,26 | 0,84 |
| ENSG00000147168 | IL2RG    | 1,52E-03 | 2,49E-02 | 0,49  | 1,41 |
| ENSG00000143878 | RHOB     | 1,53E-03 | 2,51E-02 | -0,50 | 0,71 |
| ENSG00000005801 | ZNF195   | 1,53E-03 | 2,51E-02 | 0,22  | 1,17 |
| ENSG00000047849 | MAP4     | 1,54E-03 | 2,51E-02 | -0,19 | 0,87 |
| ENSG00000111863 | ADTRP    | 1,56E-03 | 2,52E-02 | 1,10  | 2,14 |
| ENSG00000056277 | ZNF280C  | 1,57E-03 | 2,53E-02 | 0,25  | 1,19 |
| ENSG00000082641 | NFE2L1   | 1,59E-03 | 2,55E-02 | -0,21 | 0,87 |
| ENSG00000141503 | MINK1    | 1,59E-03 | 2,55E-02 | -0,25 | 0,84 |
| ENSG00000014257 | ACPP     | 1,60E-03 | 2,55E-02 | 0,72  | 1,64 |
| ENSG00000204131 | NHSL2    | 1,60E-03 | 2,55E-02 | -0,24 | 0,85 |
| ENSG00000132514 | CLEC10A  | 1,61E-03 | 2,56E-02 | 0,40  | 1,32 |
| ENSG00000148082 | SHC3     | 1,62E-03 | 2,56E-02 | 0,84  | 1,80 |
| ENSG00000106004 | HOXA5    | 1,63E-03 | 2,57E-02 | -0,43 | 0,74 |
| ENSG00000121807 | CCR2     | 1,63E-03 | 2,57E-02 | 0,46  | 1,38 |
| ENSG00000166188 | ZNF319   | 1,64E-03 | 2,58E-02 | -0,33 | 0,80 |

|                 |            |          |          |       |      |
|-----------------|------------|----------|----------|-------|------|
| ENSG00000198719 | DLL1       | 1,65E-03 | 2,58E-02 | -0,40 | 0,76 |
| ENSG00000123411 | IKZF4      | 1,67E-03 | 2,60E-02 | -0,33 | 0,80 |
| ENSG00000126016 | AMOT       | 1,67E-03 | 2,60E-02 | -0,29 | 0,82 |
| ENSG00000198113 | TOR4A      | 1,67E-03 | 2,60E-02 | -0,28 | 0,83 |
| ENSG00000267221 | C17orf113  | 1,67E-03 | 2,60E-02 | -0,56 | 0,68 |
| ENSG00000177427 | MIEF2      | 1,68E-03 | 2,61E-02 | -0,29 | 0,82 |
| ENSG00000140332 | TLE3       | 1,70E-03 | 2,62E-02 | -0,32 | 0,80 |
| ENSG00000162878 | PKDCC      | 1,70E-03 | 2,62E-02 | -0,41 | 0,75 |
| ENSG00000171408 | PDE7B      | 1,74E-03 | 2,67E-02 | 0,27  | 1,21 |
| ENSG00000132005 | RFX1       | 1,75E-03 | 2,67E-02 | -0,35 | 0,78 |
| ENSG00000148773 | MKI67      | 1,75E-03 | 2,67E-02 | 0,63  | 1,54 |
| ENSG00000172366 | MCRIP2     | 1,76E-03 | 2,67E-02 | 0,31  | 1,24 |
| ENSG00000111670 | GNPTAB     | 1,77E-03 | 2,68E-02 | 0,36  | 1,28 |
| ENSG00000081059 | TCF7       | 1,78E-03 | 2,69E-02 | 0,38  | 1,30 |
| ENSG00000145283 | SLC10A6    | 1,78E-03 | 2,70E-02 | -0,79 | 0,58 |
| ENSG00000123473 | STIL       | 1,79E-03 | 2,70E-02 | 0,45  | 1,37 |
| ENSG00000165304 | MELK       | 1,79E-03 | 2,71E-02 | 1,07  | 2,10 |
| ENSG00000167625 | ZNF526     | 1,82E-03 | 2,74E-02 | -0,25 | 0,84 |
| ENSG00000273542 | HIST1H4K   | 1,83E-03 | 2,75E-02 | 0,63  | 1,55 |
| ENSG00000189319 | FAM53B     | 1,85E-03 | 2,76E-02 | -0,22 | 0,86 |
| ENSG00000247315 | ZCCHC3     | 1,86E-03 | 2,77E-02 | -0,28 | 0,82 |
| ENSG00000156931 | VPS8       | 1,87E-03 | 2,78E-02 | 0,23  | 1,17 |
| ENSG00000213493 | ACTN4P1    | 1,88E-03 | 2,80E-02 | -0,75 | 0,60 |
| ENSG00000256616 | AP002414.2 | 1,90E-03 | 2,82E-02 | -0,46 | 0,73 |
| ENSG00000113368 | LMNB1      | 1,91E-03 | 2,83E-02 | 0,48  | 1,39 |
| ENSG00000138448 | ITGAV      | 1,93E-03 | 2,85E-02 | 0,35  | 1,27 |
| ENSG00000116133 | DHCR24     | 1,94E-03 | 2,87E-02 | 0,33  | 1,26 |
| ENSG00000271503 | CCL5       | 1,94E-03 | 2,87E-02 | 0,41  | 1,32 |
| ENSG00000170439 | METTL7B    | 1,97E-03 | 2,89E-02 | 0,80  | 1,75 |
| ENSG00000198355 | PIM3       | 1,96E-03 | 2,89E-02 | -0,29 | 0,82 |
| ENSG00000127954 | STEAP4     | 1,98E-03 | 2,89E-02 | 0,34  | 1,27 |
| ENSG00000177125 | ZBTB34     | 2,01E-03 | 2,91E-02 | -0,18 | 0,88 |
| ENSG00000198752 | CDC42BPB   | 2,01E-03 | 2,91E-02 | -0,19 | 0,88 |
| ENSG00000139567 | ACVRL1     | 2,03E-03 | 2,93E-02 | -0,26 | 0,83 |
| ENSG00000133243 | BTBD2      | 2,04E-03 | 2,94E-02 | -0,21 | 0,87 |
| ENSG00000177189 | RPS6KA3    | 2,05E-03 | 2,95E-02 | 0,19  | 1,14 |
| ENSG00000196542 | SPTSSB     | 2,05E-03 | 2,96E-02 | -1,56 | 0,34 |
| ENSG00000161011 | SQSTM1     | 2,06E-03 | 2,96E-02 | -0,21 | 0,87 |
| ENSG00000184661 | CDCA2      | 2,07E-03 | 2,97E-02 | 0,93  | 1,91 |
| ENSG00000017483 | SLC38A5    | 2,08E-03 | 2,97E-02 | 0,82  | 1,76 |
| ENSG00000155097 | ATP6V1C1   | 2,10E-03 | 2,99E-02 | 0,24  | 1,18 |
| ENSG00000088179 | PTPN4      | 2,12E-03 | 2,99E-02 | 0,22  | 1,16 |
| ENSG00000104320 | NBN        | 2,12E-03 | 2,99E-02 | 0,20  | 1,15 |
| ENSG00000097046 | CDC7       | 2,13E-03 | 3,00E-02 | 0,53  | 1,45 |
| ENSG00000267397 | AC090229.1 | 2,12E-03 | 3,00E-02 | 0,71  | 1,63 |
| ENSG00000278463 | HIST1H2AB  | 2,13E-03 | 3,00E-02 | 0,48  | 1,39 |
| ENSG00000123338 | NCKAP1L    | 2,13E-03 | 3,00E-02 | 0,27  | 1,20 |

|                 |            |          |          |       |      |
|-----------------|------------|----------|----------|-------|------|
| ENSG00000134955 | SLC37A2    | 2,15E-03 | 3,02E-02 | 0,54  | 1,46 |
| ENSG00000138316 | ADAMTS14   | 2,16E-03 | 3,02E-02 | 0,85  | 1,80 |
| ENSG00000280355 | AL132656.4 | 2,16E-03 | 3,02E-02 | -0,43 | 0,74 |
| ENSG00000104312 | RIPK2      | 2,17E-03 | 3,03E-02 | 0,24  | 1,18 |
| ENSG00000134061 | CD180      | 2,18E-03 | 3,04E-02 | 0,44  | 1,36 |
| ENSG00000179262 | RAD23A     | 2,19E-03 | 3,05E-02 | -0,21 | 0,86 |
| ENSG00000183864 | TOB2       | 2,20E-03 | 3,05E-02 | -0,28 | 0,82 |
| ENSG00000256745 | AP002784.2 | 2,21E-03 | 3,06E-02 | 0,32  | 1,25 |
| ENSG00000185432 | METTL7A    | 2,22E-03 | 3,07E-02 | -0,26 | 0,83 |
| ENSG00000010671 | BTK        | 2,23E-03 | 3,07E-02 | 0,30  | 1,23 |
| ENSG00000140829 | DHX38      | 2,23E-03 | 3,07E-02 | -0,15 | 0,90 |
| ENSG00000175352 | NRIP3      | 2,24E-03 | 3,07E-02 | 0,85  | 1,80 |
| ENSG00000053702 | NRIP2      | 2,24E-03 | 3,07E-02 | -0,42 | 0,75 |
| ENSG00000239672 | NME1       | 2,25E-03 | 3,08E-02 | 0,54  | 1,45 |
| ENSG00000219607 | PPP1R3G    | 2,25E-03 | 3,09E-02 | -0,40 | 0,76 |
| ENSG00000129128 | SPCS3      | 2,27E-03 | 3,09E-02 | 0,26  | 1,20 |
| ENSG00000205221 | VIT        | 2,26E-03 | 3,09E-02 | 0,29  | 1,23 |
| ENSG00000236792 | AL513175.2 | 2,27E-03 | 3,09E-02 | 0,64  | 1,56 |
| ENSG00000100336 | APOL4      | 2,28E-03 | 3,10E-02 | 0,35  | 1,27 |
| ENSG00000173894 | CBX2       | 2,29E-03 | 3,10E-02 | -0,42 | 0,75 |
| ENSG00000112742 | TTK        | 2,30E-03 | 3,10E-02 | 0,69  | 1,61 |
| ENSG00000217027 | TPT1P4     | 2,29E-03 | 3,10E-02 | 0,23  | 1,17 |
| ENSG00000078081 | LAMP3      | 2,31E-03 | 3,11E-02 | 1,01  | 2,01 |
| ENSG00000108557 | RAI1       | 2,31E-03 | 3,11E-02 | -0,37 | 0,77 |
| ENSG00000156127 | BATF       | 2,31E-03 | 3,11E-02 | 0,72  | 1,65 |
| ENSG00000164040 | PGRMC2     | 2,32E-03 | 3,12E-02 | -0,28 | 0,82 |
| ENSG00000108846 | ABCC3      | 2,35E-03 | 3,12E-02 | -0,26 | 0,83 |
| ENSG00000150281 | CTF1       | 2,33E-03 | 3,12E-02 | -0,61 | 0,66 |
| ENSG00000165152 | TMEM246    | 2,35E-03 | 3,12E-02 | -0,35 | 0,78 |
| ENSG00000183160 | TMEM119    | 2,33E-03 | 3,12E-02 | 0,77  | 1,71 |
| ENSG00000259488 | AC023355.1 | 2,35E-03 | 3,12E-02 | -0,55 | 0,68 |
| ENSG00000162745 | OLFML2B    | 2,35E-03 | 3,12E-02 | 0,69  | 1,61 |
| ENSG00000151062 | CACNA2D4   | 2,36E-03 | 3,13E-02 | 0,43  | 1,34 |
| ENSG00000196376 | SLC35F1    | 2,37E-03 | 3,14E-02 | -0,80 | 0,57 |
| ENSG00000080986 | NDC80      | 2,40E-03 | 3,17E-02 | 0,84  | 1,79 |
| ENSG00000106123 | EPHB6      | 2,40E-03 | 3,17E-02 | -0,32 | 0,80 |
| ENSG00000125798 | FOXA2      | 2,41E-03 | 3,17E-02 | -1,30 | 0,41 |
| ENSG00000128340 | RAC2       | 2,41E-03 | 3,17E-02 | 0,44  | 1,35 |
| ENSG00000167182 | SP2        | 2,41E-03 | 3,17E-02 | -0,38 | 0,77 |
| ENSG00000197256 | KANK2      | 2,42E-03 | 3,17E-02 | -0,20 | 0,87 |
| ENSG00000185650 | ZFP36L1    | 2,43E-03 | 3,19E-02 | -0,29 | 0,82 |
| ENSG00000119760 | SUPT7L     | 2,44E-03 | 3,19E-02 | 0,15  | 1,11 |
| ENSG00000147676 | MAL2       | 2,45E-03 | 3,20E-02 | -0,99 | 0,50 |
| ENSG00000154736 | ADAMTS5    | 2,45E-03 | 3,20E-02 | -0,42 | 0,75 |
| ENSG00000135540 | NHSL1      | 2,45E-03 | 3,20E-02 | -0,29 | 0,82 |
| ENSG00000100031 | GGT1       | 2,47E-03 | 3,21E-02 | 0,66  | 1,58 |
| ENSG00000174173 | TRMT10C    | 2,47E-03 | 3,22E-02 | 0,25  | 1,19 |

|                 |              |          |          |       |      |
|-----------------|--------------|----------|----------|-------|------|
| ENSG00000129595 | EPB41L4A     | 2,49E-03 | 3,22E-02 | -0,30 | 0,81 |
| ENSG00000148229 | POLE3        | 2,49E-03 | 3,22E-02 | 0,21  | 1,16 |
| ENSG00000158715 | SLC45A3      | 2,51E-03 | 3,23E-02 | 0,50  | 1,41 |
| ENSG00000187688 | TRPV2        | 2,51E-03 | 3,23E-02 | 0,32  | 1,25 |
| ENSG00000188921 | HACD4        | 2,52E-03 | 3,24E-02 | 0,20  | 1,15 |
| ENSG00000139926 | FRMD6        | 2,53E-03 | 3,25E-02 | 0,40  | 1,32 |
| ENSG00000184182 | UBE2F        | 2,54E-03 | 3,25E-02 | 0,29  | 1,23 |
| ENSG00000157570 | TSPAN18      | 2,54E-03 | 3,25E-02 | -0,28 | 0,83 |
| ENSG00000132361 | CLUH         | 2,54E-03 | 3,26E-02 | -0,29 | 0,82 |
| ENSG00000109586 | GALNT7       | 2,55E-03 | 3,26E-02 | 0,33  | 1,26 |
| ENSG00000126461 | SCAF1        | 2,56E-03 | 3,26E-02 | -0,40 | 0,76 |
| ENSG00000164818 | DNAAF5       | 2,56E-03 | 3,26E-02 | -0,23 | 0,85 |
| ENSG00000258708 | SLC25A21-AS1 | 2,55E-03 | 3,26E-02 | -0,37 | 0,77 |
| ENSG00000263731 | AC145207.5   | 2,57E-03 | 3,26E-02 | -0,42 | 0,75 |
| ENSG00000105792 | CFAP69       | 2,57E-03 | 3,26E-02 | 0,41  | 1,33 |
| ENSG00000152518 | ZFP36L2      | 2,57E-03 | 3,26E-02 | -0,43 | 0,74 |
| ENSG00000157933 | SKI          | 2,58E-03 | 3,26E-02 | -0,36 | 0,78 |
| ENSG00000176435 | CLEC14A      | 2,59E-03 | 3,28E-02 | -0,29 | 0,82 |
| ENSG00000172081 | MOB3A        | 2,61E-03 | 3,29E-02 | -0,27 | 0,83 |
| ENSG00000196510 | ANAPC7       | 2,61E-03 | 3,29E-02 | 0,22  | 1,16 |
| ENSG00000081818 | PCDHB4       | 2,62E-03 | 3,29E-02 | -0,31 | 0,80 |
| ENSG00000118898 | PPL          | 2,62E-03 | 3,29E-02 | -0,43 | 0,74 |
| ENSG00000088325 | TPX2         | 2,65E-03 | 3,31E-02 | 0,48  | 1,40 |
| ENSG00000196924 | FLNA         | 2,66E-03 | 3,32E-02 | -0,25 | 0,84 |
| ENSG00000204397 | CARD16       | 2,67E-03 | 3,33E-02 | 0,46  | 1,38 |
| ENSG00000164253 | WDR41        | 2,68E-03 | 3,33E-02 | 0,21  | 1,16 |
| ENSG00000122756 | CNTFR        | 2,72E-03 | 3,36E-02 | -0,75 | 0,59 |
| ENSG00000087365 | SF3B2        | 2,72E-03 | 3,37E-02 | -0,18 | 0,88 |
| ENSG00000049089 | COL9A2       | 2,75E-03 | 3,39E-02 | -1,05 | 0,48 |
| ENSG00000177614 | PGBD5        | 2,75E-03 | 3,39E-02 | 0,69  | 1,61 |
| ENSG00000166482 | MFAP4        | 2,75E-03 | 3,39E-02 | -0,79 | 0,58 |
| ENSG00000275342 | PRAG1        | 2,77E-03 | 3,40E-02 | -0,37 | 0,77 |
| ENSG00000070087 | PFN2         | 2,78E-03 | 3,40E-02 | 0,42  | 1,34 |
| ENSG00000100034 | PPM1F        | 2,83E-03 | 3,44E-02 | -0,19 | 0,88 |
| ENSG00000126259 | KIRREL2      | 2,85E-03 | 3,46E-02 | 1,10  | 2,15 |
| ENSG00000164163 | ABCE1        | 2,86E-03 | 3,47E-02 | 0,23  | 1,17 |
| ENSG00000172046 | USP19        | 2,86E-03 | 3,47E-02 | -0,19 | 0,88 |
| ENSG00000100196 | KDELR3       | 2,88E-03 | 3,48E-02 | 0,63  | 1,55 |
| ENSG00000159210 | SNF8         | 2,89E-03 | 3,49E-02 | 0,19  | 1,14 |
| ENSG00000169442 | CD52         | 2,88E-03 | 3,49E-02 | 0,59  | 1,50 |
| ENSG00000150551 | LYPD1        | 2,91E-03 | 3,50E-02 | 0,93  | 1,91 |
| ENSG00000164038 | SLC9B2       | 2,91E-03 | 3,50E-02 | 0,80  | 1,74 |
| ENSG00000118263 | KLF7         | 2,93E-03 | 3,51E-02 | -0,21 | 0,86 |
| ENSG00000138944 | SHISAL1      | 2,92E-03 | 3,51E-02 | 0,64  | 1,56 |
| ENSG00000143549 | TPM3         | 2,93E-03 | 3,51E-02 | 0,18  | 1,13 |
| ENSG00000172331 | BPGM         | 2,92E-03 | 3,51E-02 | 0,36  | 1,29 |
| ENSG00000152495 | CAMK4        | 2,94E-03 | 3,51E-02 | 0,74  | 1,67 |

|                 |            |          |          |       |      |
|-----------------|------------|----------|----------|-------|------|
| ENSG00000118961 | LDAH       | 2,96E-03 | 3,53E-02 | 0,26  | 1,20 |
| ENSG00000158195 | WASF2      | 2,96E-03 | 3,53E-02 | -0,29 | 0,82 |
| ENSG00000162552 | WNT4       | 2,96E-03 | 3,53E-02 | 0,51  | 1,42 |
| ENSG00000172115 | CYCS       | 2,97E-03 | 3,53E-02 | 0,31  | 1,24 |
| ENSG00000115828 | QPCT       | 2,98E-03 | 3,54E-02 | 0,39  | 1,31 |
| ENSG00000167553 | TUBA1C     | 2,98E-03 | 3,54E-02 | 0,30  | 1,23 |
| ENSG00000182175 | RGMA       | 2,98E-03 | 3,54E-02 | -0,63 | 0,65 |
| ENSG00000124571 | XPO5       | 2,99E-03 | 3,54E-02 | 0,20  | 1,15 |
| ENSG00000164039 | BDH2       | 3,00E-03 | 3,55E-02 | 0,22  | 1,17 |
| ENSG00000169413 | RNASE6     | 3,03E-03 | 3,58E-02 | 0,35  | 1,27 |
| ENSG00000172059 | KLF11      | 3,06E-03 | 3,61E-02 | -0,33 | 0,80 |
| ENSG00000156232 | WHAMM      | 3,08E-03 | 3,62E-02 | -0,24 | 0,85 |
| ENSG00000266964 | FXD1       | 3,08E-03 | 3,62E-02 | -0,64 | 0,64 |
| ENSG00000072062 | PRKACA     | 3,08E-03 | 3,62E-02 | -0,25 | 0,84 |
| ENSG00000085872 | CHERP      | 3,09E-03 | 3,62E-02 | -0,33 | 0,80 |
| ENSG00000107186 | MPDZ       | 3,10E-03 | 3,63E-02 | -0,21 | 0,87 |
| ENSG00000164483 | SAMD3      | 3,13E-03 | 3,65E-02 | 0,60  | 1,51 |
| ENSG00000168032 | ENTPD3     | 3,14E-03 | 3,65E-02 | 0,64  | 1,56 |
| ENSG00000100479 | POLE2      | 3,15E-03 | 3,66E-02 | 0,49  | 1,40 |
| ENSG00000134900 | TPP2       | 3,16E-03 | 3,68E-02 | 0,18  | 1,13 |
| ENSG00000144199 | FAHD2B     | 3,18E-03 | 3,68E-02 | -0,31 | 0,81 |
| ENSG00000111961 | SASH1      | 3,19E-03 | 3,69E-02 | -0,18 | 0,88 |
| ENSG00000136541 | ERMN       | 3,19E-03 | 3,70E-02 | 0,91  | 1,88 |
| ENSG00000156253 | RWDD2B     | 3,21E-03 | 3,70E-02 | 0,30  | 1,24 |
| ENSG00000108932 | SLC16A6    | 3,23E-03 | 3,72E-02 | 0,75  | 1,68 |
| ENSG00000132613 | MTSS1L     | 3,24E-03 | 3,72E-02 | -0,23 | 0,85 |
| ENSG00000148218 | ALAD       | 3,24E-03 | 3,72E-02 | -0,17 | 0,89 |
| ENSG00000183715 | OPCML      | 3,24E-03 | 3,72E-02 | 0,81  | 1,75 |
| ENSG00000100014 | SPECC1L    | 3,24E-03 | 3,72E-02 | -0,16 | 0,90 |
| ENSG00000140451 | PIF1       | 3,26E-03 | 3,73E-02 | 0,84  | 1,79 |
| ENSG00000178741 | COX5A      | 3,31E-03 | 3,78E-02 | 0,27  | 1,20 |
| ENSG00000116815 | CD58       | 3,33E-03 | 3,78E-02 | 0,40  | 1,32 |
| ENSG00000185130 | HIST1H2BL  | 3,33E-03 | 3,78E-02 | 0,48  | 1,40 |
| ENSG00000120253 | NUP43      | 3,37E-03 | 3,80E-02 | 0,14  | 1,10 |
| ENSG00000151320 | AKAP6      | 3,37E-03 | 3,80E-02 | 0,57  | 1,48 |
| ENSG00000156711 | MAPK13     | 3,37E-03 | 3,80E-02 | 0,58  | 1,50 |
| ENSG00000181744 | DIPK2A     | 3,36E-03 | 3,80E-02 | 0,24  | 1,18 |
| ENSG00000204392 | LSM2       | 3,37E-03 | 3,80E-02 | 0,26  | 1,20 |
| ENSG00000205302 | SNX2       | 3,37E-03 | 3,80E-02 | 0,16  | 1,12 |
| ENSG00000007237 | GAS7       | 3,41E-03 | 3,81E-02 | 0,23  | 1,17 |
| ENSG00000133706 | LARS       | 3,40E-03 | 3,81E-02 | 0,15  | 1,11 |
| ENSG00000139496 | NUP58      | 3,41E-03 | 3,81E-02 | 0,17  | 1,12 |
| ENSG00000142327 | RNPEPL1    | 3,39E-03 | 3,81E-02 | -0,29 | 0,82 |
| ENSG00000143324 | XPR1       | 3,40E-03 | 3,81E-02 | 0,30  | 1,23 |
| ENSG00000145495 | MARCH6     | 3,40E-03 | 3,81E-02 | -0,21 | 0,87 |
| ENSG00000198168 | SVIP       | 3,39E-03 | 3,81E-02 | -0,24 | 0,85 |
| ENSG00000234287 | AC099560.2 | 3,40E-03 | 3,81E-02 | 0,20  | 1,15 |



|                 |           |          |          |       |      |
|-----------------|-----------|----------|----------|-------|------|
| ENSG00000104299 | INTS9     | 3,42E-03 | 3,82E-02 | 0,19  | 1,14 |
| ENSG00000054803 | CBLN4     | 3,43E-03 | 3,82E-02 | -0,47 | 0,72 |
| ENSG00000177363 | LRRN4CL   | 3,43E-03 | 3,82E-02 | -0,83 | 0,56 |
| ENSG00000134283 | PPHLN1    | 3,46E-03 | 3,84E-02 | 0,18  | 1,13 |
| ENSG00000184863 | RBM33     | 3,48E-03 | 3,86E-02 | -0,19 | 0,88 |
| ENSG00000176731 | C8orf59   | 3,49E-03 | 3,87E-02 | 0,23  | 1,17 |
| ENSG00000169933 | FRMPD4    | 3,50E-03 | 3,87E-02 | 0,91  | 1,87 |
| ENSG00000145349 | CAMK2D    | 3,52E-03 | 3,89E-02 | 0,15  | 1,11 |
| ENSG00000166925 | TSC22D4   | 3,53E-03 | 3,90E-02 | -0,24 | 0,85 |
| ENSG00000138036 | DYNC2LI1  | 3,55E-03 | 3,91E-02 | 0,22  | 1,16 |
| ENSG00000094880 | CDC23     | 3,56E-03 | 3,92E-02 | 0,15  | 1,11 |
| ENSG00000151725 | CENPU     | 3,61E-03 | 3,97E-02 | 0,50  | 1,42 |
| ENSG00000005700 | IBTK      | 3,63E-03 | 3,98E-02 | 0,22  | 1,17 |
| ENSG00000139278 | GLIPR1    | 3,64E-03 | 3,98E-02 | 0,25  | 1,19 |
| ENSG00000159199 | ATP5MC1   | 3,71E-03 | 4,04E-02 | 0,21  | 1,16 |
| ENSG00000246430 | LINC00968 | 3,73E-03 | 4,06E-02 | -0,85 | 0,56 |
| ENSG00000104325 | DECR1     | 3,74E-03 | 4,06E-02 | 0,20  | 1,14 |
| ENSG00000187323 | DCC       | 3,74E-03 | 4,06E-02 | -0,78 | 0,58 |
| ENSG00000169783 | LINGO1    | 3,76E-03 | 4,07E-02 | -0,41 | 0,75 |
| ENSG00000134153 | EMC7      | 3,79E-03 | 4,10E-02 | 0,23  | 1,17 |
| ENSG00000188856 | RPSAP47   | 3,80E-03 | 4,11E-02 | 0,57  | 1,48 |
| ENSG00000135677 | GNS       | 3,83E-03 | 4,13E-02 | 0,21  | 1,16 |
| ENSG00000184897 | H1FX      | 3,83E-03 | 4,13E-02 | -0,26 | 0,83 |
| ENSG00000254402 | LRRC24    | 3,84E-03 | 4,14E-02 | -0,43 | 0,74 |
| ENSG00000180198 | RCC1      | 3,86E-03 | 4,15E-02 | 0,37  | 1,29 |
| ENSG00000123505 | AMD1      | 3,87E-03 | 4,16E-02 | 0,17  | 1,12 |
| ENSG00000141965 | FEM1A     | 3,88E-03 | 4,17E-02 | -0,20 | 0,87 |
| ENSG00000138772 | ANXA3     | 3,89E-03 | 4,17E-02 | -0,57 | 0,67 |
| ENSG00000140740 | UQCRC2    | 3,90E-03 | 4,17E-02 | 0,15  | 1,11 |
| ENSG00000147224 | PRPS1     | 3,90E-03 | 4,17E-02 | 0,20  | 1,15 |
| ENSG00000173548 | SNX33     | 3,89E-03 | 4,17E-02 | -0,23 | 0,85 |
| ENSG00000251301 | LINC02384 | 3,90E-03 | 4,17E-02 | 0,75  | 1,68 |
| ENSG00000127324 | TSPAN8    | 3,92E-03 | 4,18E-02 | -0,57 | 0,67 |
| ENSG00000140650 | PMM2      | 3,92E-03 | 4,18E-02 | 0,30  | 1,23 |
| ENSG00000034053 | APBA2     | 3,95E-03 | 4,21E-02 | 0,43  | 1,35 |
| ENSG00000094804 | CDC6      | 3,97E-03 | 4,22E-02 | 0,77  | 1,70 |
| ENSG00000189057 | FAM111B   | 4,00E-03 | 4,23E-02 | 0,97  | 1,96 |
| ENSG00000182389 | CACNB4    | 4,01E-03 | 4,24E-02 | 0,71  | 1,63 |
| ENSG00000162695 | SLC30A7   | 4,01E-03 | 4,24E-02 | 0,21  | 1,16 |
| ENSG00000157456 | CCNB2     | 4,02E-03 | 4,24E-02 | 0,95  | 1,93 |
| ENSG00000138757 | G3BP2     | 4,04E-03 | 4,25E-02 | 0,15  | 1,11 |
| ENSG00000174306 | ZHX3      | 4,06E-03 | 4,27E-02 | -0,31 | 0,81 |
| ENSG00000162337 | LRP5      | 4,06E-03 | 4,27E-02 | -0,31 | 0,81 |
| ENSG00000163517 | HDAC11    | 4,08E-03 | 4,29E-02 | -0,28 | 0,83 |
| ENSG00000188282 | RUFY4     | 4,09E-03 | 4,29E-02 | 0,90  | 1,87 |
| ENSG00000034971 | MYOC      | 4,10E-03 | 4,30E-02 | -2,01 | 0,25 |
| ENSG00000128578 | STRIP2    | 4,12E-03 | 4,31E-02 | 0,82  | 1,76 |

|                 |            |          |          |       |      |
|-----------------|------------|----------|----------|-------|------|
| ENSG00000174151 | CYB561D1   | 4,12E-03 | 4,32E-02 | -0,21 | 0,86 |
| ENSG00000119042 | SATB2      | 4,15E-03 | 4,34E-02 | 0,30  | 1,23 |
| ENSG00000148516 | ZEB1       | 4,15E-03 | 4,34E-02 | 0,20  | 1,15 |
| ENSG00000279692 | AC110285.7 | 4,19E-03 | 4,36E-02 | -0,68 | 0,62 |
| ENSG00000196353 | CPNE4      | 4,21E-03 | 4,37E-02 | -0,97 | 0,51 |
| ENSG00000237350 | CDC42P6    | 4,22E-03 | 4,37E-02 | 0,19  | 1,14 |
| ENSG00000102996 | MMP15      | 4,22E-03 | 4,37E-02 | -0,30 | 0,81 |
| ENSG00000256043 | CTSO       | 4,23E-03 | 4,38E-02 | 0,18  | 1,13 |
| ENSG00000109674 | NEIL3      | 4,24E-03 | 4,39E-02 | 0,97  | 1,96 |
| ENSG00000179912 | R3HDM2     | 4,24E-03 | 4,39E-02 | -0,24 | 0,85 |
| ENSG00000184445 | KNTC1      | 4,24E-03 | 4,39E-02 | 0,19  | 1,14 |
| ENSG00000166851 | PLK1       | 4,25E-03 | 4,40E-02 | 0,62  | 1,54 |
| ENSG00000100528 | CNIH1      | 4,27E-03 | 4,40E-02 | 0,23  | 1,18 |
| ENSG00000147119 | CHST7      | 4,27E-03 | 4,40E-02 | -0,42 | 0,75 |
| ENSG00000011422 | PLAUR      | 4,28E-03 | 4,41E-02 | 0,44  | 1,36 |
| ENSG00000105732 | ZNF574     | 4,29E-03 | 4,42E-02 | -0,29 | 0,82 |
| ENSG00000196581 | AJAP1      | 4,30E-03 | 4,42E-02 | -0,53 | 0,69 |
| ENSG00000091106 | NLRC4      | 4,31E-03 | 4,43E-02 | 0,42  | 1,33 |
| ENSG00000149929 | HIRIP3     | 4,31E-03 | 4,43E-02 | -0,28 | 0,83 |
| ENSG00000079432 | CIC        | 4,32E-03 | 4,43E-02 | -0,31 | 0,81 |
| ENSG00000154330 | PGM5       | 4,34E-03 | 4,44E-02 | -0,46 | 0,73 |
| ENSG00000158813 | EDA        | 4,34E-03 | 4,44E-02 | -0,33 | 0,80 |
| ENSG00000108175 | ZMIZ1      | 4,36E-03 | 4,46E-02 | -0,33 | 0,79 |
| ENSG00000171033 | PKIA       | 4,36E-03 | 4,46E-02 | 0,62  | 1,53 |
| ENSG00000016391 | CHDH       | 4,38E-03 | 4,47E-02 | -0,72 | 0,61 |
| ENSG00000172673 | THEMIS     | 4,42E-03 | 4,49E-02 | 0,58  | 1,50 |
| ENSG00000174547 | MRPL11     | 4,41E-03 | 4,49E-02 | 0,20  | 1,15 |
| ENSG00000155966 | AFF2       | 4,44E-03 | 4,51E-02 | 0,34  | 1,26 |
| ENSG00000078399 | HOXA9      | 4,45E-03 | 4,52E-02 | -0,33 | 0,79 |
| ENSG00000069011 | PITX1      | 4,47E-03 | 4,53E-02 | -0,37 | 0,77 |
| ENSG00000138030 | KHK        | 4,50E-03 | 4,55E-02 | -0,47 | 0,72 |
| ENSG00000000005 | TNMD       | 4,52E-03 | 4,56E-02 | -0,84 | 0,56 |
| ENSG00000182600 | SNORC      | 4,52E-03 | 4,56E-02 | -1,23 | 0,43 |
| ENSG00000204469 | PRRC2A     | 4,53E-03 | 4,56E-02 | -0,28 | 0,82 |
| ENSG00000180537 | RNF182     | 4,55E-03 | 4,57E-02 | 0,73  | 1,65 |
| ENSG00000160678 | S100A1     | 4,56E-03 | 4,58E-02 | -0,88 | 0,54 |
| ENSG00000112280 | COL9A1     | 4,58E-03 | 4,59E-02 | -1,56 | 0,34 |
| ENSG00000181027 | FKRP       | 4,58E-03 | 4,59E-02 | -0,25 | 0,84 |
| ENSG00000230006 | ANKRD36BP2 | 4,58E-03 | 4,59E-02 | 0,47  | 1,39 |
| ENSG00000163904 | SENP2      | 4,61E-03 | 4,60E-02 | -0,19 | 0,87 |
| ENSG00000165416 | SUGT1      | 4,61E-03 | 4,60E-02 | -0,16 | 0,90 |
| ENSG00000198759 | EGFL6      | 4,61E-03 | 4,60E-02 | -0,94 | 0,52 |
| ENSG00000110344 | UBE4A      | 4,62E-03 | 4,60E-02 | 0,11  | 1,08 |
| ENSG00000086991 | NOX4       | 4,64E-03 | 4,61E-02 | -0,61 | 0,65 |
| ENSG00000100139 | MICALL1    | 4,64E-03 | 4,61E-02 | -0,19 | 0,88 |
| ENSG00000160791 | CCR5       | 4,63E-03 | 4,61E-02 | 0,50  | 1,41 |
| ENSG00000166689 | PLEKHA7    | 4,63E-03 | 4,61E-02 | -0,28 | 0,83 |

|                 |            |          |          |       |      |
|-----------------|------------|----------|----------|-------|------|
| ENSG00000138764 | CCNG2      | 4,65E-03 | 4,62E-02 | -0,18 | 0,88 |
| ENSG00000054116 | TRAPPC3    | 4,70E-03 | 4,65E-02 | 0,18  | 1,13 |
| ENSG00000024526 | DEPDC1     | 4,70E-03 | 4,66E-02 | 0,84  | 1,78 |
| ENSG00000143119 | CD53       | 4,73E-03 | 4,68E-02 | 0,36  | 1,28 |
| ENSG00000146859 | TMEM140    | 4,74E-03 | 4,68E-02 | -0,29 | 0,82 |
| ENSG00000151779 | NBAS       | 4,75E-03 | 4,69E-02 | 0,13  | 1,09 |
| ENSG00000099875 | MKNK2      | 4,76E-03 | 4,69E-02 | -0,35 | 0,78 |
| ENSG00000159314 | ARHGAP27   | 4,79E-03 | 4,71E-02 | -0,24 | 0,85 |
| ENSG00000254910 | AC136475.2 | 4,80E-03 | 4,72E-02 | -0,68 | 0,62 |
| ENSG00000105246 | EBI3       | 4,86E-03 | 4,75E-02 | -0,57 | 0,68 |
| ENSG00000116731 | PRDM2      | 4,86E-03 | 4,75E-02 | -0,15 | 0,90 |
| ENSG00000179364 | PACS2      | 4,86E-03 | 4,75E-02 | -0,18 | 0,88 |
| ENSG00000065183 | WDR3       | 4,87E-03 | 4,75E-02 | 0,16  | 1,11 |
| ENSG00000120708 | TGFBI      | 4,87E-03 | 4,75E-02 | 0,55  | 1,46 |
| ENSG00000152683 | SLC30A6    | 4,88E-03 | 4,76E-02 | 0,18  | 1,13 |
| ENSG00000032219 | ARID4A     | 4,88E-03 | 4,76E-02 | -0,17 | 0,89 |
| ENSG00000150275 | PCDH15     | 4,88E-03 | 4,76E-02 | 0,98  | 1,97 |
| ENSG00000123064 | DDX54      | 4,95E-03 | 4,81E-02 | -0,15 | 0,90 |
| ENSG00000139187 | KLRG1      | 4,97E-03 | 4,82E-02 | 0,49  | 1,40 |
| ENSG00000177283 | FZD8       | 4,99E-03 | 4,83E-02 | -0,29 | 0,82 |
| ENSG00000138674 | SEC31A     | 5,00E-03 | 4,83E-02 | 0,22  | 1,17 |
| ENSG00000170899 | GSTA4      | 5,02E-03 | 4,85E-02 | 0,20  | 1,14 |
| ENSG00000103196 | CRISPLD2   | 5,03E-03 | 4,86E-02 | 0,47  | 1,39 |
| ENSG00000198826 | ARHGAP11A  | 5,04E-03 | 4,86E-02 | 0,49  | 1,40 |
| ENSG00000171206 | TRIM8      | 5,05E-03 | 4,87E-02 | -0,26 | 0,83 |
| ENSG00000214717 | ZBED1      | 5,06E-03 | 4,87E-02 | -0,16 | 0,89 |
| ENSG00000063245 | EPN1       | 5,08E-03 | 4,88E-02 | -0,20 | 0,87 |
| ENSG00000278828 | HIST1H3H   | 5,08E-03 | 4,88E-02 | 0,31  | 1,24 |
| ENSG00000160007 | ARHGAP35   | 5,10E-03 | 4,90E-02 | -0,19 | 0,88 |
| ENSG00000160111 | CPAMD8     | 5,11E-03 | 4,90E-02 | -0,84 | 0,56 |
| ENSG00000184517 | ZFP1       | 5,13E-03 | 4,91E-02 | 0,19  | 1,14 |
| ENSG00000167470 | MIDN       | 5,15E-03 | 4,93E-02 | -0,33 | 0,80 |
| ENSG00000100425 | BRD1       | 5,17E-03 | 4,94E-02 | -0,18 | 0,88 |
| ENSG00000137831 | UACA       | 5,18E-03 | 4,95E-02 | -0,18 | 0,88 |
| ENSG00000150753 | CCT5       | 5,20E-03 | 4,97E-02 | 0,20  | 1,15 |
| ENSG00000144366 | GULP1      | 5,22E-03 | 4,98E-02 | -0,32 | 0,80 |
| ENSG00000159788 | RGS12      | 5,21E-03 | 4,98E-02 | -0,19 | 0,88 |
| ENSG00000205060 | SLC35B4    | 5,22E-03 | 4,98E-02 | 0,18  | 1,13 |
| ENSG00000026103 | FAS        | 5,25E-03 | 5,00E-02 | 0,28  | 1,21 |
| ENSG00000159479 | MED8       | 5,25E-03 | 5,00E-02 | 0,16  | 1,12 |
| ENSG00000149582 | TMEM25     | 5,26E-03 | 5,00E-02 | -0,32 | 0,80 |
| ENSG00000158109 | TPRG1L     | 5,25E-03 | 5,00E-02 | -0,23 | 0,85 |
| ENSG00000132603 | NIP7       | 5,26E-03 | 5,00E-02 | 0,26  | 1,20 |
