# Supplementary material for: RNA Sequencing Reveals Interacting Key Determinants of Osteoarthritis Acting in Subchondral Bone and Articular Cartilage: Identification of IL11 and CHADL as Attractive Treatment Targets
Source: PubMed Central journal article supplement — Arthritis Rheumatol. 2021 Mar 21;73(5):789–99. doi: 10.1002/art.41600 (PMC8252798; doi:10.1002/art.41600), 2021-03-21
Supplement: ART-73-789-s014.pdf [file ART-73-789-s014.pdf]

**Supplementary table 2** - Differences in gene expression levels of cartilage and bone markers measured in preserved and lesioned bone and cartilage tissue.

| Marker    | Genes  | Preserved<br>cartilage vs. bone |           | Lesioned<br>cartilage vs. bone |          |
|-----------|--------|---------------------------------|-----------|--------------------------------|----------|
|           |        | Fold difference <sup>a</sup>    | P-value   | Fold difference <sup>a</sup>   | P-value  |
| Cartilage | COL2A1 | 0,02                            | 7,46E-48  | 0,01                           | 7,93E-24 |
| Cartilage | COMP   | 0,01                            | 1,03E-60  | 0,01                           | 2,76E-47 |
| Cartilage | CRTAC1 | 0,01                            | 1,64E-112 | 0,01                           | 1,88E-75 |
| Bone      | COL1A1 | 1,85                            | 1,78E-01  | 4,31                           | 2,25E-03 |
| Bone      | SPP1   | 8,85                            | 3,54E-19  | 2,56                           | 3,56E-04 |
| Bone      | BGLAP  | 9,17                            | 5,92E-08  | 11,19                          | 1,59E-11 |

<sup>a</sup> Fold difference between cartilage and bone with cartilage expression levels as reference
