# Supplementary material for: RNA Sequencing Reveals Interacting Key Determinants of Osteoarthritis Acting in Subchondral Bone and Articular Cartilage: Identification of IL11 and CHADL as Attractive Treatment Targets
Source: PubMed Central journal article supplement — Arthritis Rheumatol. 2021 Mar 21;73(5):789–99. doi: 10.1002/art.41600 (PMC8252798; doi:10.1002/art.41600), 2021-03-21
Supplement: ART-73-789-s015.pdf [file ART-73-789-s015.pdf]

**Supplementary table 14** - Validation and replication of the RNAseq findings. The preserved samples are set as the reference.

| Genes   | RNAseq<br>(N=18 samples) |      |          | Validation<br>(N=10 technical replicates) |      |          | Replication<br>(N=10 biological replicates) |      |          |
|---------|--------------------------|------|----------|-------------------------------------------|------|----------|---------------------------------------------|------|----------|
|         | $\beta$                  | FC   | FDR      | $\beta$                                   | FC   | Pval     | $\beta$                                     | FC   | Pval     |
| FRZB    | -6,97                    | 0,48 | 5,13E-08 | -1,82                                     | 0,28 | 2,00E-06 | -2,27                                       | 0,27 | 4,10E-05 |
| CHRDL2  | -6,16                    | 0,09 | 4,13E-06 | -3,46                                     | 0,08 | 1,00E-03 | -3,93                                       | 0,10 | 2,00E-03 |
| POSTN   | 3,89                     | 2,55 | 5,99E-03 | 2,32                                      | 5,01 | 2,93E-04 | 2,52                                        | 3,37 | 5,00E-04 |
| ASPN    | 3,52                     | 3,10 | 1,24E-02 | 2,33                                      | 5,04 | 1,40E-02 | 2,21                                        | 2,34 | 1,00E-03 |
| CNTNAP2 | 6,25                     | 2,90 | 3,38E-06 | 1,38                                      | 2,60 | 1,60E-02 | 1,17                                        | 2,14 | 3,10E-02 |
| STMN2   | 5,14                     | 23,0 | 1,76E-04 | 3,04                                      | 7,86 | 1,20E-02 | 4,52                                        | 9,33 | 5,77E-07 |
