# Supplementary material for: RNA Sequencing Reveals Interacting Key Determinants of Osteoarthritis Acting in Subchondral Bone and Articular Cartilage: Identification of IL11 and CHADL as Attractive Treatment Targets
Source: PubMed Central journal article supplement — Arthritis Rheumatol. 2021 Mar 21;73(5):789–99. doi: 10.1002/art.41600 (PMC8252798; doi:10.1002/art.41600), 2021-03-21
Supplement: ART-73-789-s016.pdf [file ART-73-789-s016.pdf]

**Supplementary table 8** - Gene enrichment analysis on overlapping genes with similar direction of effect between the subchondral bone and the articular cartilage (N= 305 genes)

| Category           | Term                                          | Count | Percentage | FDR      | Genes                                                                                                                                                                                                                                              |
|--------------------|-----------------------------------------------|-------|------------|----------|----------------------------------------------------------------------------------------------------------------------------------------------------------------------------------------------------------------------------------------------------|
| Cellular Component | GO:0005615~extracellular space                | 37    | 12         | 4,42E-03 | WNT16, CRLF1, VCAN, DKK3, CHRDL2, FAP, DLG3, WNT11, IL11, CCN4, OGN, TPI1, FRMD4B, SPP1, TNFSF11, TNFAIP6, OMD, POSTN, CD63, GGH, LUM, MANF, LGI4, SEMA3D, GDF6, SCUBE1, FRZB, COL6A3, FSTL1, HTRA1, GPRC5B, ERF, GPC5, RELN, SPOCK3, S100A4, GPX3 |
| Cellular Component | GO:0005576~extracellular region               | 36    | 12         | 4,56E-03 | WNT16, CRLF1, VCAN, DKK3, WNT11, IL11, FGF14, OGN, TNR, SPP1, TNFSF11, CRISPLD1, OMD, CALU, FGF13, SPATA6, PDZD2, NGF, FST, LUM, ADAM12, PAMR1, CRIM1, LGI4, GDF6, FRZB, COL6A3, FSTL1, HTRA1, THBS3, HTRA3, ERF, GPC5, PLAC9, CD55, GPX3          |
| Cellular Component | GO:0005578~proteinaceous extracellular matrix | 17    | 6          | 7,98E-03 | WNT16, VCAN, WNT11, CHADL, COCH, CCN4, OGN, ASPN, TNR, OMD, POSTN, LUM, ADAMTS17, COL6A3, GPC5, RELN, SPOCK3                                                                                                                                       |
