# Supplementary material for: RNA Sequencing Reveals Interacting Key Determinants of Osteoarthritis Acting in Subchondral Bone and Articular Cartilage: Identification of IL11 and CHADL as Attractive Treatment Targets
Source: PubMed Central journal article supplement — Arthritis Rheumatol. 2021 Mar 21;73(5):789–99. doi: 10.1002/art.41600 (PMC8252798; doi:10.1002/art.41600), 2021-03-21
Supplement: ART-73-789-s018.pdf [file ART-73-789-s018.pdf]

**Supplementary table 5** - Gene enrichment analysis on differentially expressed genes in OA subchondral bone showing an absolute fold change of 2 or higher (N=53 genes)

| Category           | Term                                          | Count | Percentage | FDR      | Genes                                                                                                 |
|--------------------|-----------------------------------------------|-------|------------|----------|-------------------------------------------------------------------------------------------------------|
| Cellular component | GO:0005615~extracellular space                | 16    | 32,7       | 1,19E-05 | WNT16, CRLF1, CHRDL2, CHI3L2, FAP, IL11, OGN, POSTN, GDF6, CTHRC1, LEP, GPC5, SPOCK3, MSMP, HP, CCL18 |
| Cellular component | GO:0005578~proteinaceous extracellular matrix | 7     | 14,3       | 4,50E-02 | WNT16, OGN, ASPN, POSTN, CTHRC1, GPC5, SPOCK3                                                         |
