# Supplementary figures and images for: RNA Sequencing Reveals Interacting Key Determinants of Osteoarthritis Acting in Subchondral Bone and Articular Cartilage: Identification of IL11 and CHADL as Attractive Treatment Targets
Source: PubMed Central journal article supplement — Arthritis Rheumatol. 2021 Mar 21;73(5):789–99. doi: 10.1002/art.41600 (PMC8252798; doi:10.1002/art.41600), 2021-03-21

Power vs. sample size with  $\text{fdr}=0.05$  and  $\Delta/\sigma = 3.5251$

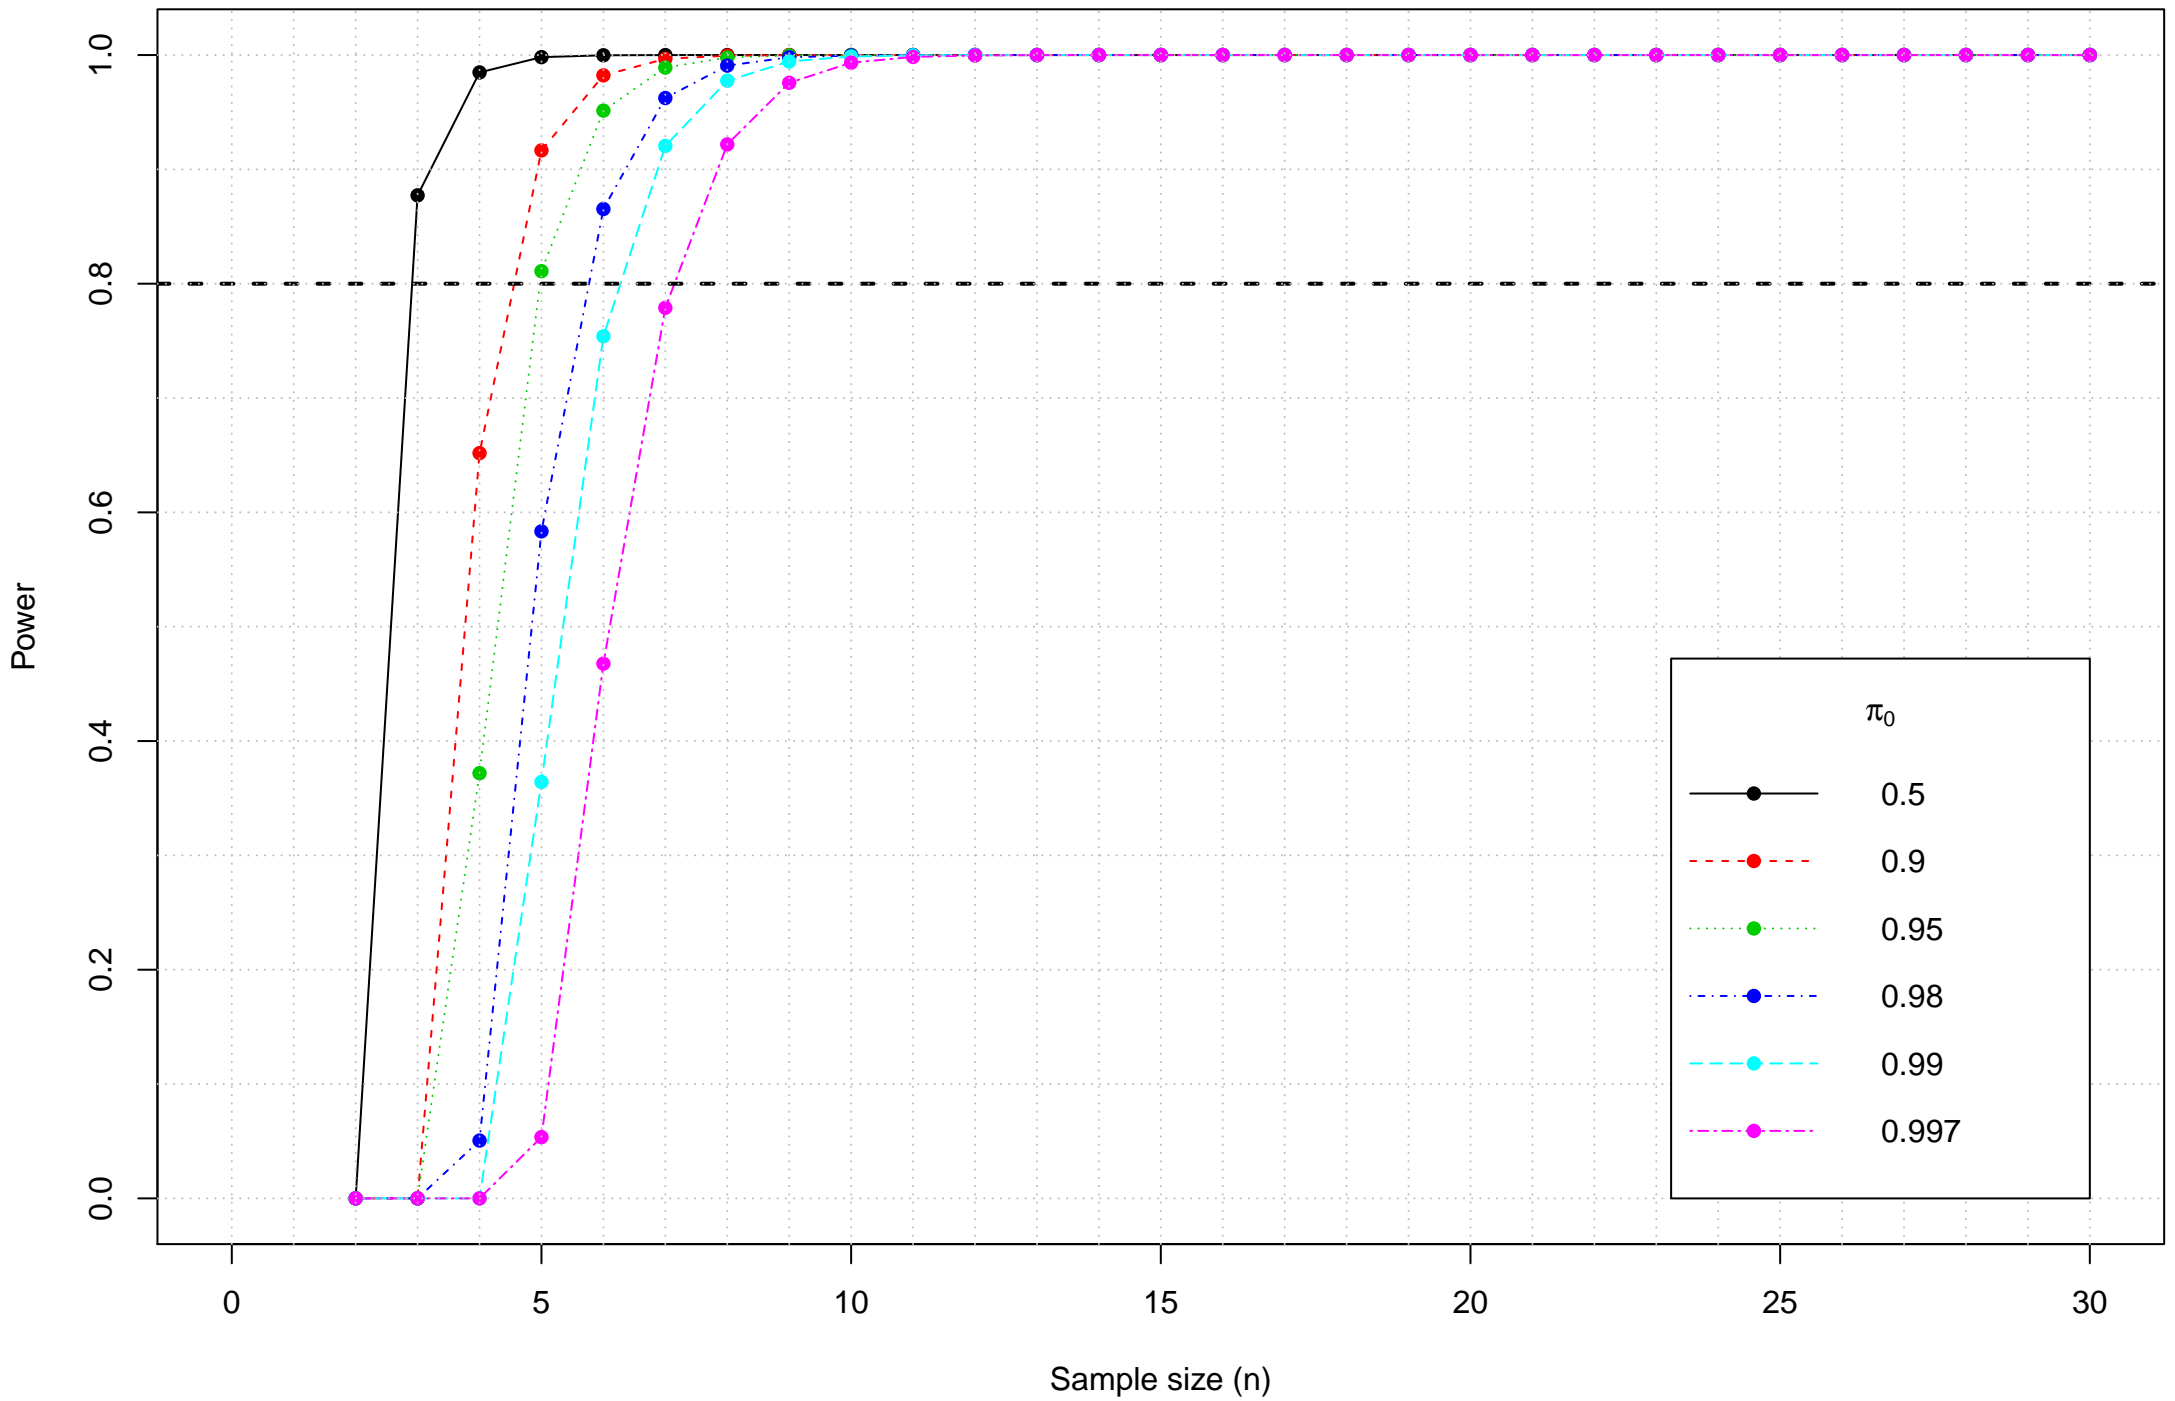

Supplement: ART-73-789-s011.pdf [file ART-73-789-s011.pdf]
